# Supplementary material for: Particulate matter emissions during autopsies: a method to reduce exposure
Source: Environ Sci Pollut Res Int. 2022 Apr 14;29(40):60519–30. doi: 10.1007/s11356-022-20021-7 (PMC9008663; doi:10.1007/s11356-022-20021-7)
Supplement: Supplementary file 1 — Supplementary file1 (XLSX 15 kb) [file 11356_2022_20021_MOESM1_ESM.xlsx]

## Sheet: mean PM values
										ordinary oscillating saw
							PMbkgd (mean)					PMsaw (mean)
					PM10 [ug/m3]	PM2,5 [ug/m3]	PM1 [ug/m3]	PMcoarse [µg/m³]	1-2.5µm [µg/m³]		PM10 [ug/m3]	PM2,5 [ug/m3]	PM1 [ug/m3]	PMcoarse [µg/m³]	1-2.5µm [µg/m³]
			05-31-2016	OS1	4.79	3.292	2.578	1.498	0.714		57.17	17.39	6.97	39.78	10.42
			05-31-2016	OS2	9.84	8.72	7.978	1.12	0.742		135.4	52.43	36.21	83	16.22
			06-01-2016	OS3	12.73	12.38	11.94	0.352	0.436		177.9	34.99	15.49	142.9	19.5
			06-02-2016	OS4	15.99	14.44	13.54	1.552	0.9		151.8	31.75	16.63	120	15.13
			06-02-2016	OS5	17.6	13.9	12.67	3.7	1.226		247.8	68.65	27.11	179.1	41.53
			06-02-2016	OS6	29.15	24.92	23.85	4.226	1.066		104.6	32.56	22.24	72.09	10.32
			06-03-2016	OS7	24.21	15.41	13.49	8.8	1.916		952.3	170.7	53.17	781.6	117.6
			06-03-2016	OS8	36.71	30.41	27.99	6.296	2.426		55.92	31.74	27.85	24.18	3.891
			06-06-2016	OS9	24.09	22.98	22.14	1.118	0.836		67.53	35.69	26.11	31.84	9.576
			06-06-2016	OS10	30.62	27.99	27.36	2.622	0.632		60.27	35.11	30.26	25.15	4.849
			06-07-2016	OS11	24.34	22.58	21.72	1.76	0.864		89.92	42.6	27.96	47.32	14.63
			06-07-2016	OS12	38.73	36.66	35.62	2.072	1.036		121.3	43.27	33.61	78.03	9.664
			06-13-2016	OS13	19.93	12.3	9.912	7.624	2.392		85.9	18.6	10.76	67.3	7.836
			06-15-2016	OS14	47.83	45.16	43.49	2.676	1.662		321.7	75.82	39.68	245.9	36.14
			06-27-2016	OS15	11.59	10.74	10.2	0.852	0.536		203.1	44.47	17.57	158.7	26.91
			06-28-2016	OS16	24.85	22.05	20.76	2.8	1.292		132	41.85	24.91	90.12	16.93
										adapted oscillating saw
							PMbkgd (mean)					PMsaw (mean)
					PM10 [ug/m3]	PM2,5 [ug/m3]	PM1 [ug/m3]	PMcoarse [µg/m³]	1-2.5µm [µg/m³]		PM10 [ug/m3]	PM2,5 [ug/m3]	PM1 [ug/m3]	PMcoarse [µg/m³]	1-2.5µm [µg/m³]
			06-07-2016	AS1	25.01	22.41	21.72	2.602	0.692		25.33	21.84	20.73	3.493	1.115
			06-08-2016	AS2	18.27	17.66	17.14	0.612	0.516		23.93	21.84	20.67	2.094	1.168
			06-09-2016	AS3	46.99	44.23	42.16	2.764	2.07		40.11	36.25	34.29	3.856	1.967
			06-09-2016	AS4	25.49	21.49	19.78	4	1.704		24.75	21.83	20.26	2.916	1.568
			06-09-2016	AS5	29.08	17.92	15.5	11.17	2.42		49.22	20.18	15.58	29.03	4.605
			06-10-2016	AS6	54.57	46.97	44.35	7.602	2.622		52.11	44.5	41.55	7.614	2.948
			06-10-2016	AS7	31.06	28.39	24.11	2.674	4.276		28.59	26.21	23.14	2.381	3.066
			06-13-2016	AS8	9.262	8.356	7.65	0.906	0.706		11.28	8.893	7.973	2.382	0.9203
			06-15-2016	AS9	14.31	9.44	7.656	4.874	1.784		12.69	8.778	7.601	3.914	1.177
			06-15-2016	AS10	17.51	13.09	11.99	4.414	1.106		17.23	13.7	12.58	3.529	1.125
			06-16-2016	AS11	10.69	8.814	8.028	1.878	0.786		15.01	11.31	10.24	3.707	1.068
			06-20-2016	AS12	17.27	13.05	11.74	4.218	1.312		15.56	13.32	12.17	2.239	1.154
			06-21-2016	AS13	20.1	17.56	16.5	2.542	1.054		19.94	16.79	15.17	3.148	1.618
			06-21-2016	AS14	21.17	16.28	14.22	4.886	2.066		21.85	15.37	13.66	6.476	1.719
			06-22-2016	AS15	27.54	24.46	23.38	3.078	1.082		27.16	22.79	20.89	4.371	1.897
			06-28-2016	AS16	16.68	13.61	12.24	3.072	1.362		17	13.81	11.7	3.188	2.109

## Sheet: Temperature and rel humidity
		temperature [°C]	rel. Humidity [%]
05-31-2016	OS1	23.7457	47.5589
05-31-2016	OS2	24.1817	46.1108
06-01-2016	OS3	23.7993	55.0229
06-02-2016	OS4	23.0947	56.1974
06-02-2016	OS5	23.9097	55.9758
06-02-2016	OS6	23.5708	55.6216
06-03-2016	OS7	23.7576	53.7552
06-03-2016	OS8	25.5158	50.5088
06-06-2016	OS9	23.5242	54.1833
06-06-2016	OS10	23.4526	49.3188
06-07-2016	OS11	23.1194	50.3011
06-07-2016	OS12	23.3744	47.1067
06-13-2016	OS13	24.098	53.7084
06-15-2016	OS14	23.9271	52.9919
06-27-2016	OS15	22.8954	49.9048
06-28-2016	OS16	23.3858	53.7804
06-07-2016	AS1	24.1061	45.8429
06-08-2016	AS2	23.5585	48.2273
06-09-2016	AS3	23.0197	46.0697
06-09-2016	AS4	23.9435	45.0259
06-09-2016	AS5	23.8996	43.5831
06-10-2016	AS6	23.9403	46.1972
06-10-2016	AS7	22.7224	45.8603
06-13-2016	AS8	25.4426	52.5648
06-15-2016	AS10	24.4234	52.9437
06-16-2016	AS11	22.4952	49.337
06-20-2016	AS12	22.9936	46.7088
06-21-2016	AS13	22.499	58.2559
06-21-2016	AS14	23.3284	56.0057
06-22-2016	AS15	23.2745	58.6794
06-28-2016	AS16	24.1656	53.9841
