# Supplementary material for: Particulate matter emissions during autopsies: a method to reduce exposure
Source: Environ Sci Pollut Res Int. 2022 Apr 14;29(40):60519–30. doi: 10.1007/s11356-022-20021-7 (PMC9008663; doi:10.1007/s11356-022-20021-7)
Supplement: Supplementary file 3 — Supplementary file3 (XLSX 1409 kb) [file 11356_2022_20021_MOESM3_ESM.xlsx]

## Sheet: 1OS
date & time	PM10 [ug/m3]	PM2,5 [ug/m3]	PM1 [ug/m3]	Inhalable [ug/m3]	Thoracic [ug/m3]	Alveolic [ug/m3]	Zeit in sek	2.5 bis 10	1 bis 2.5	kleiner 1
31.05.2016 09:32:28	19.1	4.5	3.3	24.5	16.7	5	6	14.6	1.2	3.3				Sägedauer	132
31.05.2016 09:32:34	3	3	2.8	3	3	3	12	0	0.2	2.8											Temperature [°C]	Humidity [%rH]
31.05.2016 09:32:40	3	3	3	3	3	3	18	0	0	3											24.76	47.59
31.05.2016 09:32:46	5.7	5	2.9	5.7	5.7	5.3	24	0.7	2.1	2.9											24.67	47.48
31.05.2016 09:32:52	3.4	3.2	2.5	3.4	3.4	3.3	30	0.2	0.7	2.5											24.48	47.28
31.05.2016 09:32:58	9	4.3	3.2	9	8.2	4.6	36	4.7	1.1	3.2											24.48	47.07
31.05.2016 09:33:04	10.5	3.7	3.4	10.5	10.1	5	42	6.8	0.3	3.4											24.38	46.13
31.05.2016 09:33:10	3.9	3.9	3.9	3.9	3.9	3.9	48	0	0	3.9											24.29	45.92
31.05.2016 09:33:16	4	4	4	4	4	4	54	0	0	4											24.19	44.14
31.05.2016 09:33:22	3.3	3.3	3.3	3.3	3.3	3.3	60	0	0	3.3											24.09	42.05
31.05.2016 09:33:28	4.4	4.4	4.4	4.4	4.4	4.4	66	0	0	4.4											24.09	41.43
31.05.2016 09:33:34	4.1	4.1	4.1	4.1	4.1	4.1	72	0	0	4.1											24	43.52
31.05.2016 09:33:40	3.2	3.1	2.7	3.2	3.2	3.1	78	0.1	0.4	2.7											23.9	45.6
31.05.2016 09:33:46	11.4	4.2	2.5	11.7	9.8	4.7	84	7.2	1.7	2.5											23.9	46.44
31.05.2016 09:33:52	3.8	3.6	2.9	3.8	3.8	3.7	90	0.2	0.7	2.9											23.81	47.48
31.05.2016 09:33:58	2.8	2.8	2.8	2.8	2.8	2.8	96	0	0	2.8											23.81	48.01
31.05.2016 09:34:04	3.7	3.7	3.2	3.7	3.7	3.7	102	0	0.5	3.2											23.71	49.05
31.05.2016 09:34:10	4.3	3.5	2.8	4.3	4.3	3.9	108	0.8	0.7	2.8											23.71	49.57
31.05.2016 09:34:16	5.1	4.3	2.9	5.1	5.1	4.7	114	0.8	1.4	2.9											23.61	50.09
31.05.2016 09:34:22	2	2	2	2	2	2	120	0	0	2											23.61	50.62
31.05.2016 09:34:28	3.5	3.5	2.9	3.5	3.5	3.5	126	0	0.6	2.9											23.52	50.41
31.05.2016 09:34:34	3	2.9	2.4	3	3	2.9	132	0.1	0.5	2.4											23.52	50.72
31.05.2016 09:34:40	5.8	4.1	3	43.3	13.5	4.9	138	1.7	1.1	3											23.42	50.83
31.05.2016 09:34:46	3.7	3.5	2.6	3.7	3.7	3.6	144	0.2	0.9	2.6											23.42	50.2
31.05.2016 09:34:52	2.8	2.8	2.8	2.8	2.8	2.8	150	0	0	2.8											23.42	50.09
31.05.2016 09:34:58	3	3	2.9	3	3	3	156	0	0.1	2.9		0									23.42	50.41
31.05.2016 09:35:04	10.7	4.8	2.8	110.3	15.5	6.4	162	5.9	2	2.8		6									23.52	49.36
31.05.2016 09:35:10	3	3	3	3	3	3	168	0	0	3		12									23.42	49.36
31.05.2016 09:35:16	5.7	3.9	2.7	5.7	5.7	4.7	174	1.8	1.2	2.7		18									23.42	47.38
31.05.2016 09:35:22	2.5	2.5	2.5	2.5	2.5	2.5	180	0	0	2.5		24									23.42	45.08
31.05.2016 09:35:28	8.8	3	2.7	8.8	8.4	4.2	186	5.8	0.3	2.7		30									23.33	43.73
31.05.2016 09:35:34	5.8	4.5	2.5	5.8	5.8	5.1	192	1.3	2	2.5		36									23.33	45.4
31.05.2016 09:35:40	3.4	3	2.3	3.4	3.4	3.2	198	0.4	0.7	2.3		42									23.33	46.23
31.05.2016 09:35:46	2.3	2.3	2.3	2.3	2.3	2.3	204	0	0	2.3		48									23.33	47.59
31.05.2016 09:35:52	4.8	4	2.1	4.8	4.8	4.4	210	0.8	1.9	2.1		54									23.33	48.84
31.05.2016 09:35:58	2.8	2.8	2.7	2.8	2.8	2.8	216	0	0.1	2.7		60									23.23	49.26
31.05.2016 09:36:04	2.1	2.1	2.1	2.1	2.1	2.1	222	0	0	2.1		66									23.23	50.2
31.05.2016 09:36:10	4.1	3.6	2.9	4.1	4.1	3.8	228	0.5	0.7	2.9		72
31.05.2016 09:36:16	11.3	4.7	4.3	11.3	10.9	6.3	234	6.6	0.4	4.3		78
31.05.2016 09:36:22	10.8	3.2	2.5	15.8	10	3.4	240	7.6	0.7	2.5		84
31.05.2016 09:36:28	6.3	3.2	2.7	43.8	13.7	3.6	246	3.1	0.5	2.7		90
31.05.2016 09:36:34	3.6	3.3	2.1	3.6	3.6	3.4	252	0.3	1.2	2.1		96
31.05.2016 09:36:40	2.4	2.4	2.4	2.4	2.4	2.4	258	0	0	2.4		102
31.05.2016 09:36:46	3.4	3.1	2.4	3.4	3.4	3.2	264	0.3	0.7	2.4		108
31.05.2016 09:36:52	5.6	2.7	2	43.1	13.2	3.7	270	2.9	0.7	2		114
31.05.2016 09:36:58	2.7	2.7	2.6	2.7	2.7	2.7	276	0	0.1	2.6		120
31.05.2016 09:37:04	5	3.7	2.4	5	5	4.3	282	1.3	1.3	2.4		126
31.05.2016 09:37:10	2.7	2.7	2.6	2.7	2.7	2.7	288	0	0.1	2.6		132
31.05.2016 09:37:16	6	4.3	2.4	6	6	5.1	294	1.7	1.9	2.4		138
31.05.2016 09:37:22	2.3	2.3	2.3	2.3	2.3	2.3	300	0	0	2.3		144
31.05.2016 09:37:28	9.3	4.5	3.2	9.3	8.6	4.9	306	4.8	1.3	3.2		150
31.05.2016 09:37:34	7.5	2.7	2.3	7.5	7.2	3.9	312	4.8	0.4	2.3		156
31.05.2016 09:37:40	2.8	2.8	2.8	2.8	2.8	2.8	318	0	0	2.8		162
31.05.2016 09:37:46	5.6	5.1	3.5	5.6	5.5	5.3	324	0.5	1.6	3.5		168
31.05.2016 09:37:52	5.9	3.1	2.7	5.9	5.8	4	330	2.8	0.4	2.7		174
31.05.2016 09:37:58	3.1	2.7	2.1	60.8	10	2.9	336	0.4	0.6	2.1		180
31.05.2016 09:38:04	3	3	3	3	3	3	342	0	0	3		186
31.05.2016 09:38:10	6	5	2.8	6	6	5.4	348	1	2.2	2.8		192
31.05.2016 09:38:16	8.1	5	2.8	8.1	8	6	354	3.1	2.2	2.8		198
31.05.2016 09:38:22	5.8	4.8	3.6	43.3	13.5	5.3	360	1	1.2	3.6		204
31.05.2016 09:38:28	4.8	2.7	2.2	26.4	11.4	3.2	366	2.1	0.5	2.2		210
31.05.2016 09:38:34	3.4	3.2	2.5	3.4	3.4	3.3	372	0.2	0.7	2.5		216
31.05.2016 09:38:40	3.9	3.4	2.6	3.9	3.9	3.6	378	0.5	0.8	2.6		222
31.05.2016 09:38:46	5	4.5	3.1	5	5	4.7	384	0.5	1.4	3.1		228
31.05.2016 09:38:52	4.9	3.1	2.3	4.9	4.9	3.9	390	1.8	0.8	2.3		234
31.05.2016 09:38:58	3.3	3.1	2.4	3.3	3.3	3.2	396	0.2	0.7	2.4		240
31.05.2016 09:39:04	4.7	3.6	3	4.7	4.7	4.1	402	1.1	0.6	3		246
31.05.2016 09:39:10	2.5	2.5	2.5	2.5	2.5	2.5	408	0	0	2.5		252
31.05.2016 09:39:16	5.8	2.5	1.9	5.8	5.5	3	414	3.3	0.6	1.9		258
31.05.2016 09:39:22	2.4	2.4	2.4	2.4	2.4	2.4	420	0	0	2.4		264
31.05.2016 09:39:28	6	2.8	2.3	6	5.7	3.2	426	3.2	0.5	2.3		270
31.05.2016 09:39:34	1.8	1.8	1.8	1.8	1.8	1.8	432	0	0	1.8		276
31.05.2016 09:39:40	6.1	3.8	2.7	27.7	12.7	4.4	438	2.3	1.1	2.7		282
31.05.2016 09:39:46	3.4	2.9	2.2	3.4	3.4	3.1	444	0.5	0.7	2.2		288
31.05.2016 09:39:52	3.3	2.8	2	3.3	3.3	3	450	0.5	0.8	2		294
31.05.2016 09:39:58	2.1	2.1	2.1	2.1	2.1	2.1	456	0	0	2.1		300
31.05.2016 09:40:04	5.8	4.5	3	5.8	5.8	5.1	462	1.3	1.5	3		306
31.05.2016 09:40:10	11.1	3.5	2.7	16.1	10.3	3.6	468	7.6	0.8	2.7		312
31.05.2016 09:40:16	7.9	3.3	2.5	7.9	7.2	3.6	474	4.6	0.8	2.5		318
31.05.2016 09:40:22	9.3	8	3.5	9.3	9.3	8.6	480	1.3	4.5	3.5		324
31.05.2016 09:40:28	22.9	6.7	3.9	203.6	47	9	486	16.2	2.8	3.9		330
31.05.2016 09:40:34	24.5	7.7	5.1	150.7	35.3	10.8	492	16.8	2.6	5.1		336
31.05.2016 09:40:40	32.2	14.9	5.4	235.6	40.7	19	498	17.3	9.5	5.4		342
31.05.2016 09:40:46	72.7	15.4	5.6	240.6	76.5	20.5	504	57.3	9.8	5.6		348
31.05.2016 09:40:52	63.1	16.4	6.2	271.6	70	27.3	510	46.7	10.2	6.2		354
31.05.2016 09:40:58	67.3	14.9	7	131.8	76.2	23	516	52.4	7.9	7		360
31.05.2016 09:41:04	36.5	13.4	6.9	58.1	41.4	18.1	522	23.1	6.5	6.9		366
31.05.2016 09:41:10	89.1	27.1	10.6	211	94.3	38.8	528	62	16.5	10.6		372
31.05.2016 09:41:16	111.5	25.9	11.2	363.5	119.4	40.7	534	85.6	14.7	11.2		378
31.05.2016 09:41:22	100.9	25.3	10.7	683.4	126.6	39.9	540	75.6	14.6	10.7		384
31.05.2016 09:41:28	104.9	58	16.8	164.3	116.3	72.1	546	46.9	41.2	16.8		390
31.05.2016 09:41:34	190.5	46.6	15.4	1051.6	272.7	74.1	552	143.9	31.2	15.4		396
31.05.2016 09:41:40	157.5	36.9	14.2	945.6	194.4	59.2	558	120.6	22.7	14.2		402
31.05.2016 09:41:46	139.1	34.9	13.7	652.6	163.7	52.9	564	104.2	21.2	13.7		408
31.05.2016 09:41:52	128.4	33.4	12.2	265.9	128.7	48.4	570	95	21.2	12.2		414
31.05.2016 09:41:58	85.3	25.8	9	537.6	86.5	38.9	576	59.5	16.8	9		420
31.05.2016 09:42:04	105.3	27.8	9	350.6	147.7	40.5	582	77.5	18.8	9		426
31.05.2016 09:42:10	133.8	24.8	8.9	427.5	137.7	40.6	588	109	15.9	8.9		432
31.05.2016 09:42:16	74.9	33.3	10.2	179.5	76.6	42.3	594	41.6	23.1	10.2		438
31.05.2016 09:42:22	135.9	43.3	13.6	655.4	168.6	56.5	600	92.6	29.7	13.6		444
31.05.2016 09:42:28	123.4	32.9	11.6	383.4	162.8	50.3	606	90.5	21.3	11.6		450
31.05.2016 09:42:34	83.6	17.9	8.1	193.7	93.5	30.2	612	65.7	9.8	8.1		456
31.05.2016 09:42:40	85.8	28.7	10.4	389.8	106.2	41.8	618	57.1	18.3	10.4		462
31.05.2016 09:42:46	87.3	17.5	7.8	214.5	90.6	29.2	624	69.8	9.7	7.8		468
31.05.2016 09:42:52	62	21.7	7	162.3	63.1	31.1	630	40.3	14.7	7		474
31.05.2016 09:42:58	94.2	22.4	8.2	122.2	91.3	33.2	636	71.8	14.2	8.2		480
31.05.2016 09:43:04	81.3	18.3	7.4	96.9	73	25.7	642	63	10.9	7.4		486
31.05.2016 09:43:10	53	15.3	6.6	79.6	56.6	22.5	648	37.7	8.7	6.6		492
31.05.2016 09:43:16	65.3	13.2	7.2	124.8	73.8	22.6	654	52.1	6	7.2		498
31.05.2016 09:43:22	42.1	20.2	8.1	42.1	41.2	26.1	660	21.9	12.1	8.1		504
31.05.2016 09:43:28	66.6	20.6	7.7	103.1	69.9	27.4	666	46	12.9	7.7		510
31.05.2016 09:43:34	54	19.5	7.8	153.6	57.5	29.6	672	34.5	11.7	7.8		516
31.05.2016 09:43:40	72.7	23.2	7.4	99.6	74.6	32.1	678	49.5	15.8	7.4		522
31.05.2016 09:43:46	53.2	13.3	7.6	111.9	54.4	19.7	684	39.9	5.7	7.6		528
31.05.2016 09:43:52	56.4	16	6.5	57.4	50.7	23.4	690	40.4	9.5	6.5		534
31.05.2016 09:43:58	42.8	16.2	5.9	144	61	22.9	696	26.6	10.3	5.9		540
31.05.2016 09:44:04	41.7	24.7	7.9	41.7	41.2	30.6	702	17	16.8	7.9		546
31.05.2016 09:44:10	52.7	20.9	7.5	207	79.1	28.1	708	31.8	13.4	7.5		552
31.05.2016 09:44:16	57.1	14.3	6.7	79.4	59.2	22.5	714	42.8	7.6	6.7		558
31.05.2016 09:44:22	70.7	18.4	7.8	81.7	63.6	24.4	720	52.3	10.6	7.8		564
31.05.2016 09:44:28	54.8	14.5	6.4	76.7	57.4	22.1	726	40.3	8.1	6.4		570
31.05.2016 09:44:34	53.1	14.9	6.7	53.8	48.4	21.8	732	38.2	8.2	6.7		576
31.05.2016 09:44:40	47.7	14.4	6.6	70	50.6	21.1	738	33.3	7.8	6.6		582
31.05.2016 09:44:46	35.2	11.7	6.8	131.8	55.4	17	744	23.5	4.9	6.8		588
31.05.2016 09:44:52	52.7	17.6	6.9	62.7	50.6	24.7	750	35.1	10.7	6.9		594
31.05.2016 09:44:58	66.4	21.8	7.1	81.4	63.4	29.5	756	44.6	14.7	7.1		600
31.05.2016 09:45:04	41.7	12.5	5.9	99.4	46.6	20	762	29.2	6.6	5.9		606
31.05.2016 09:45:10	33.1	13.1	5.2	55	37.8	17.4	768	20	7.9	5.2		612
31.05.2016 09:45:16	39.8	14.1	6.2	44.8	38.4	20.2	774	25.7	7.9	6.2		618
31.05.2016 09:45:22	51.8	12.3	5.5	66.7	47.6	16.4	780	39.5	6.8	5.5		624
31.05.2016 09:45:28	28.3	11.3	4.8	49.9	33.3	15	786	17	6.5	4.8		630
31.05.2016 09:45:34	30.3	13.5	5	30.7	28.3	16.9	792	16.8	8.5	5		636
31.05.2016 09:45:40	29	12.9	4.9	50.6	35.1	17.5	798	16.1	8	4.9		642
31.05.2016 09:45:46	24.4	13.5	5.3	24.4	24.2	17.7	804	10.9	8.2	5.3		648
31.05.2016 09:45:52	41.6	15.1	5	47	38.3	19.2	810	26.5	10.1	5		654
31.05.2016 09:45:58	39.2	8.5	4.9	39.9	35	13.2	816	30.7	3.6	4.9		660
31.05.2016 09:46:04	17.3	7.8	3.9	38.9	23.9	11.6	822	9.5	3.9	3.9		666
31.05.2016 09:46:10	18.5	9.1	4.4	18.5	18.3	12.6	828	9.4	4.7	4.4		672
31.05.2016 09:46:16	13.8	5.9	4.3	13.8	13.5	8	834	7.9	1.6	4.3		678
31.05.2016 09:46:22	15.6	9.1	4.1	15.6	15.5	12	840	6.5	5	4.1		684
31.05.2016 09:46:28	26.8	12.9	5.3	26.8	26.3	17.4	846	13.9	7.6	5.3		690
31.05.2016 09:46:34	29	8.8	4.1	34.3	26.5	11.5	852	20.2	4.7	4.1		696
31.05.2016 09:46:40	16.1	7.4	4.2	115.7	20.8	9.6	858	8.7	3.2	4.2		702
31.05.2016 09:46:46	25.9	7.2	3.8	30.9	23.9	9.2	864	18.7	3.4	3.8		708
31.05.2016 09:46:52	18.6	5.9	3.8	40.5	23.4	8	870	12.7	2.1	3.8		714
31.05.2016 09:46:58	25.5	6.9	4	25.8	23.4	10.7	876	18.6	2.9	4		720
31.05.2016 09:47:04	15.8	8.3	4.5	53.3	23.2	10.6	882	7.5	3.8	4.5		726
31.05.2016 09:47:10	23	9.4	4.6	226.5	31.8	12.9	888	13.6	4.8	4.6		732
31.05.2016 09:47:16	31.9	8.5	3.9	31.9	29.7	13.1	894	23.4	4.6	3.9
31.05.2016 09:47:22	29.3	9.5	5.3	29.6	27.2	13.9	900	19.8	4.2	5.3
31.05.2016 09:47:28	24.7	5.7	4.8	29.7	23.5	9.1	906	19	0.9	4.8
31.05.2016 09:47:34	24.9	6.2	3.1	25.6	21.3	8.1	912	18.7	3.1	3.1
31.05.2016 09:47:40	13.5	5.9	3.5	13.5	13.3	8.6	918	7.6	2.4	3.5
31.05.2016 09:47:46	19	5.7	3.1	23.9	18	7.7	924	13.3	2.6	3.1
31.05.2016 09:47:52	14.2	3.4	2.8	94.2	28.7	4.3	930	10.8	0.6	2.8
31.05.2016 09:47:58	5.2	4.6	2.8	5.2	5.2	4.9	936	0.6	1.8	2.8
31.05.2016 09:48:04	7.5	5.1	3	7.5	7.5	6.2	942	2.4	2.1	3
31.05.2016 09:48:10	5.7	3.6	2.8	5.7	5.7	4.2	948	2.1	0.8	2.8
31.05.2016 09:48:16	20.7	6	3.3	21.4	17.4	7.1	954	14.7	2.7	3.3
31.05.2016 09:48:22	17.8	6.3	2.9	18.2	16.1	8	960	11.5	3.4	2.9
31.05.2016 09:48:28	10.5	5.7	3.4	110.1	15.4	6.8	966	4.8	2.3	3.4
31.05.2016 09:48:34	13.5	7.2	3.8	13.5	13.4	9.3	972	6.3	3.4	3.8
31.05.2016 09:48:40	19.2	6.7	4.6	24.2	18.2	8.3	978	12.5	2.1	4.6
31.05.2016 09:48:46	14.1	8	4	14.1	13.9	10	984	6.1	4	4
31.05.2016 09:48:52	20.6	7	4.1	25.6	19.7	9.5	990	13.6	2.9	4.1
31.05.2016 09:48:58	13.5	5.8	3.3	13.5	13.4	8.9	996	7.7	2.5	3.3
31.05.2016 09:49:04	24.4	4.2	2.9	25.1	20.3	5.7	1002	20.2	1.3	2.9
31.05.2016 09:49:10	9.9	5.2	3	47.4	17.5	7	1008	4.7	2.2	3
31.05.2016 09:49:16	15.8	7	3.1	15.8	15	8.8	1014	8.8	3.9	3.1
31.05.2016 09:49:22	10.6	3.8	3	10.6	9.8	5.1	1020	6.8	0.8	3
31.05.2016 09:49:28	13.2	5	3.1	13.2	12.2	6.2	1026	8.2	1.9	3.1
31.05.2016 09:49:34	15.9	3.5	3.3	16.2	14.1	5.2	1032	12.4	0.2	3.3
31.05.2016 09:49:40	10.1	5.6	3.5	10.1	10	6.9	1038	4.5	2.1	3.5
31.05.2016 09:49:46	12.6	5.6	3.7	70.2	19	7	1044	7	1.9	3.7
31.05.2016 09:49:52	14.1	5.1	3.1	14.1	13.4	6.7	1050	9	2	3.1
31.05.2016 09:49:58	22.5	5.9	3.5	27.8	20	7.3	1056	16.6	2.4	3.5
31.05.2016 09:50:04	16.9	7	3.2	21.9	16	8.1	1062	9.9	3.8	3.2
31.05.2016 09:50:10	19.4	3.3	3	24.4	17.6	4.8	1068	16.1	0.3	3
31.05.2016 09:50:16	9.6	4.7	3.3	9.6	9.5	6.6	1074	4.9	1.4	3.3
31.05.2016 09:50:22	3.6	3.6	2.9	3.6	3.6	3.6	1080	0	0.7	2.9
31.05.2016 09:50:28	12.1	6.7	3	12.1	11.9	8.4	1086	5.4	3.7	3
31.05.2016 09:50:34	6.4	4.4	3.2	6.4	6.3	4.9	1092	2	1.2	3.2
31.05.2016 09:50:40	13.4	4.5	3.1	13.4	12.5	6.4	1098	8.9	1.4	3.1
31.05.2016 09:50:46	18.8	5.9	3.7	23.8	17.8	7.7	1104	12.9	2.2	3.7
31.05.2016 09:50:52	4.7	4.7	3.7	4.7	4.7	4.7	1110	0	1	3.7
31.05.2016 09:50:58	7.7	5.2	2.9	7.7	7.7	6	1116	2.5	2.3	2.9
31.05.2016 09:51:04	2.9	2.8	2.3	2.9	2.9	2.8	1122	0.1	0.5	2.3
31.05.2016 09:51:10	7	3.7	2.8	370.7	13.1	4.8	1128	3.3	0.9	2.8
31.05.2016 09:51:16	2.8	2.8	2.7	2.8	2.8	2.8	1134	0	0.1	2.7
31.05.2016 09:51:22	5	3.7	2.8	5	5	4.3	1140	1.3	0.9	2.8
31.05.2016 09:51:28	11.8	4.7	2.7	11.8	11.7	7.1	1146	7.1	2	2.7
31.05.2016 09:51:34	10.2	5.4	4.1	109.8	15.3	6.9	1152	4.8	1.3	4.1
31.05.2016 09:51:40	9	5.4	4.2	9	8.9	6.7	1158	3.6	1.2	4.2
31.05.2016 09:51:46	11.7	6.9	4.3	11.7	11.4	8	1164	4.8	2.6	4.3
31.05.2016 09:51:52	21.7	5.2	3.6	26.7	19.8	6.6	1170	16.5	1.6	3.6
31.05.2016 09:51:58	9.1	5.6	3.9	9.1	9.1	7.2	1176	3.5	1.7	3.9
31.05.2016 09:52:04	3.9	3.9	2.8	3.9	3.9	3.9	1182	0	1.1	2.8
31.05.2016 09:52:10	12.8	5.6	3.7	12.8	12	7.1	1188	7.2	1.9	3.7
31.05.2016 09:52:16	4.2	4.1	3.2	4.2	4.2	4.2	1194	0.1	0.9	3.2
31.05.2016 09:52:22	5.8	4.6	3.4	5.8	5.8	5.2	1200	1.2	1.2	3.4
31.05.2016 09:52:28	5.8	4	3.3	5.8	5.7	4.8	1206	1.8	0.7	3.3
31.05.2016 09:52:34	7.1	4.5	3.2	7.1	7.1	5.3	1212	2.6	1.3	3.2
31.05.2016 09:52:40	4.1	3.9	2.6	4.1	4.1	4	1218	0.2	1.3	2.6
31.05.2016 09:52:46	3.7	3.7	3	3.7	3.7	3.7	1224	0	0.7	3
31.05.2016 09:52:52	6.6	4.6	3.1	6.6	6.6	5.5	1230	2	1.5	3.1
31.05.2016 09:52:58	7.2	4.6	4	7.2	7.1	5.4	1236	2.6	0.6	4
31.05.2016 09:53:04	22.2	6.8	3.3	27.1	20.9	9.1	1242	15.4	3.5	3.3
31.05.2016 09:53:10	15.3	5.6	3.3	15.3	14.2	7.2	1248	9.7	2.3	3.3
31.05.2016 09:53:16	14.2	4.1	2.7	19.2	13.3	5	1254	10.1	1.4	2.7
31.05.2016 09:53:22	3.5	3.5	3.3	3.5	3.5	3.5	1260	0	0.2	3.3
31.05.2016 09:53:28	13.5	5.9	4.6	35.1	19.2	6.7	1266	7.6	1.3	4.6
31.05.2016 09:53:34	15.4	6.8	4.5	15.7	13.7	7.9	1272	8.6	2.3	4.5
31.05.2016 09:53:40	12.4	5.1	3.5	12.4	11.6	6.6	1278	7.3	1.6	3.5
31.05.2016 09:53:46	13.9	4.2	3.8	14.3	12.2	5.5	1284	9.7	0.4	3.8
31.05.2016 09:53:52	12.2	4.4	3.2	12.2	11.1	5.2	1290	7.8	1.2	3.2
31.05.2016 09:53:58	4.6	4.3	2.9	4.6	4.6	4.4	1296	0.3	1.4	2.9
31.05.2016 09:54:04	10.5	3.2	2.8	10.5	10	4.7	1302	7.3	0.4	2.8
31.05.2016 09:54:10	5.4	4.3	2.8	5.4	5.4	4.8	1308	1.1	1.5	2.8
31.05.2016 09:54:16	2.9	2.9	2.9	2.9	2.9	2.9	1314	0	0	2.9
31.05.2016 09:54:22	5.5	3.7	3.1	5.5	5.4	4.1	1320	1.8	0.6	3.1
31.05.2016 09:54:28	4.3	3.1	2.4	4.3	4.3	3.6	1326	1.2	0.7	2.4
31.05.2016 09:54:34	11.3	4.3	2.9	11.6	9.6	4.6	1332	7	1.4	2.9
31.05.2016 09:54:40	11.8	2.8	2.3	16.8	11	3.6	1338	9	0.5	2.3
31.05.2016 09:54:46	2.8	2.8	2.6	2.8	2.8	2.8	1344	0	0.2	2.6
31.05.2016 09:54:52	8.1	3.4	2.9	8.1	7.3	3.8	1350	4.7	0.5	2.9
31.05.2016 09:54:58	11.5	6.3	2.7	11.5	11.2	7.6	1356	5.2	3.6	2.7
31.05.2016 09:55:04	6.8	4.3	2.2	6.8	6.7	5.4	1362	2.5	2.1	2.2
31.05.2016 09:55:10	5.4	3.3	2.7	5.4	5.3	4.2	1368	2.1	0.6	2.7
31.05.2016 09:55:16	13.3	3.9	2.8	18.2	12.4	4.5	1374	9.4	1.1	2.8
31.05.2016 09:55:22	11.2	3	2.4	11.2	10.7	4.5	1380	8.2	0.6	2.4
31.05.2016 09:55:28	2.3	2.3	2.3	2.3	2.3	2.3	1386	0	0	2.3
31.05.2016 09:55:34	3.9	3.6	2.4	3.9	3.9	3.7	1392	0.3	1.2	2.4
31.05.2016 09:55:40	4.3	3	2.4	4.3	4.3	3.6	1398	1.3	0.6	2.4
31.05.2016 09:55:46	5.5	4.1	2.2	5.5	5.5	4.7	1404	1.4	1.9	2.2
31.05.2016 09:55:52	10.6	3	2.4	15.6	9.8	3.1	1410	7.6	0.6	2.4
31.05.2016 09:55:58	4.3	3.8	3.1	4.3	4.3	4	1416	0.5	0.7	3.1
31.05.2016 09:56:04	7.5	4.1	2.8	7.5	7.2	4.6	1422	3.4	1.3	2.8
31.05.2016 09:56:10	7	6.2	3.9	7	7	6.5	1428	0.8	2.3	3.9
31.05.2016 09:56:16	4.1	3.6	2.8	4.1	4.1	3.8	1434	0.5	0.8	2.8
31.05.2016 09:56:22	6.4	5.4	3.1	6.4	6.4	5.9	1440	1	2.3	3.1
31.05.2016 09:56:28	4.1	3.9	2.9	4.1	4.1	4	1446	0.2	1	2.9
31.05.2016 09:56:34	3.2	3.2	2.9	3.2	3.2	3.2	1452	0	0.3	2.9
31.05.2016 09:56:40	6.5	4.4	2.9	6.5	6.4	5	1458	2.1	1.5	2.9
31.05.2016 09:56:46	5.3	3.3	2.3	5.3	5.3	3.9	1464	2	1	2.3
31.05.2016 09:56:52	10.7	3	2.4	15.7	9.9	3.2	1470	7.7	0.6	2.4
31.05.2016 09:56:58	7.4	3.5	3	7.4	7	4.2	1476	3.9	0.5	3
31.05.2016 09:57:04	1.9	1.9	1.9	1.9	1.9	1.9	1482	0	0	1.9
31.05.2016 09:57:10	2.7	2.7	2.4	2.7	2.7	2.7	1488	0	0.3	2.4
31.05.2016 09:57:16	2.3	2.2	1.7	2.3	2.3	2.2	1494	0.1	0.5	1.7
31.05.2016 09:57:22	13	3.6	2.3	17.9	12.1	4.5	1500	9.4	1.3	2.3
31.05.2016 09:57:28	7.3	3	2.6	7.3	7.1	4.2	1506	4.3	0.4	2.6
31.05.2016 09:57:34	4.2	2.9	2.3	25.8	10.8	3	1512	1.3	0.6	2.3
31.05.2016 09:57:40	3	3	2.7	3	3	3	1518	0	0.3	2.7
31.05.2016 09:57:46	12.7	3.9	2.7	13	11.1	5.1	1524	8.8	1.2	2.7
31.05.2016 09:57:52	3.4	3.2	2.5	3.4	3.4	3.3	1530	0.2	0.7	2.5
31.05.2016 09:57:58	3.5	3.5	3.1	3.5	3.5	3.5	1536	0	0.4	3.1
31.05.2016 09:58:04	3.5	3.5	3.1	3.5	3.5	3.5	1542	0	0.4	3.1
31.05.2016 09:58:10	12.1	2.9	2.4	12.1	10.5	3.5	1548	9.2	0.5	2.4
31.05.2016 09:58:16	4.6	3.4	2.6	4.6	4.6	4	1554	1.2	0.8	2.6
31.05.2016 09:58:22	5.7	3.8	2.7	5.7	5.6	4.3	1560	1.9	1.1	2.7
31.05.2016 09:58:28	2.7	2.7	2.7	2.7	2.7	2.7	1566	0	0	2.7
31.05.2016 09:58:34	2.9	2.8	2.4	2.9	2.9	2.9	1572	0.1	0.4	2.4
31.05.2016 09:58:40	5.2	3.7	2.5	5.2	5.2	4.4	1578	1.5	1.2	2.5
31.05.2016 09:58:46	5.8	4.9	2.8	5.8	5.7	5.3	1584	0.9	2.1	2.8
31.05.2016 09:58:52	4.2	3.9	3.1	4.2	4.2	4	1590	0.3	0.8	3.1
31.05.2016 09:58:58	8.4	3.7	2.7	8.4	7.6	4	1596	4.7	1	2.7
31.05.2016 09:59:04	8.7	5	3.8	8.7	8.6	5.9	1602	3.7	1.2	3.8
31.05.2016 09:59:10	5.1	3.9	2.5	5.1	5.1	4.4	1608	1.2	1.4	2.5
31.05.2016 09:59:16	2.8	2.8	2.7	2.8	2.8	2.8	1614	0	0.1	2.7
31.05.2016 09:59:22	12.1	4.5	3.8	49.9	18.1	5.2	1620	7.6	0.7	3.8
31.05.2016 09:59:28	10.3	3.3	3.3	209.5	19.8	4.3	1626	7	0	3.3
31.05.2016 09:59:34	21.7	4.7	4	26.7	19.8	6.3	1632	17	0.7	4
31.05.2016 09:59:40	17	6.6	4.7	17.3	15	7.5	1638	10.4	1.9	4.7
31.05.2016 09:59:46	12.6	3.7	2.6	92.6	27.1	4.5	1644	8.9	1.1	2.6
31.05.2016 09:59:52	18.3	2.5	2.2	28.3	16.7	3.1	1650	15.8	0.3	2.2
31.05.2016 09:59:58	2.4	2.4	2.4	2.4	2.4	2.4	1656	0	0	2.4
31.05.2016 10:00:04	6.8	3.6	3	6.8	6.5	4	1662	3.2	0.6	3
31.05.2016 10:00:10	3	2.9	2.4	3	3	3	1668	0.1	0.5	2.4
31.05.2016 10:00:16	6.9	4.7	2.7	6.9	6.9	5.7	1674	2.2	2	2.7
31.05.2016 10:00:22	3.9	2.8	1.9	3.9	3.9	3.3	1680	1.1	0.9	1.9
31.05.2016 10:00:28	2.1	2.1	2	2.1	2.1	2.1	1686	0	0.1	2
31.05.2016 10:00:34	4.1	3.8	2.9	4.1	4.1	3.9	1692	0.3	0.9	2.9
31.05.2016 10:00:40	6	3.8	2.3	6	6	4.8	1698	2.2	1.5	2.3
31.05.2016 10:00:46	2.7	2.7	2.7	2.7	2.7	2.7	1704	0	0	2.7
31.05.2016 10:00:52	2.4	2.4	2.2	2.4	2.4	2.4	1710	0	0.2	2.2
31.05.2016 10:00:58	9.6	6.9	3.5	9.6	9.5	7.7	1716	2.7	3.4	3.5
31.05.2016 10:01:04	12.6	7.7	3	12.6	12.3	8.8	1722	4.9	4.7	3
31.05.2016 10:01:10	4.9	2.7	2.2	26.5	11.5	3.2	1728	2.2	0.5	2.2
31.05.2016 10:01:16	3.6	3.1	2.4	3.6	3.6	3.3	1734	0.5	0.7	2.4
31.05.2016 10:01:22	3.5	3.3	2.4	3.5	3.5	3.4	1740	0.2	0.9	2.4
31.05.2016 10:01:28	3.6	3.3	2.4	3.6	3.6	3.4	1746	0.3	0.9	2.4
31.05.2016 10:01:34	6.7	4.3	3.1	6.7	6.7	5.4	1752	2.4	1.2	3.1
31.05.2016 10:01:40	8.3	5.5	3.1	8.3	8.3	6.8	1758	2.8	2.4	3.1
31.05.2016 10:01:46	11.3	4.3	3.1	11.3	10.5	5.7	1764	7	1.2	3.1
31.05.2016 10:01:52	7.2	5.6	3.2	7.2	7.1	6.3	1770	1.6	2.4	3.2
31.05.2016 10:01:58	5.6	3.8	2.9	5.6	5.6	4.6	1776	1.8	0.9	2.9
31.05.2016 10:02:04	2.2	2.2	2.2	2.2	2.2	2.2	1782	0	0	2.2
31.05.2016 10:02:10	5.4	2.7	1.7	5.4	5.3	3.5	1788	2.7	1	1.7
31.05.2016 10:02:16	2.4	2.4	2.3	2.4	2.4	2.4	1794	0	0.1	2.3
31.05.2016 10:02:22	2.1	2.1	2.1	2.1	2.1	2.1	1800	0	0	2.1
31.05.2016 10:02:28	3.9	3.8	2.6	3.9	3.9	3.8	1806	0.1	1.2	2.6
31.05.2016 10:02:34	2.8	2.7	2.3	2.8	2.8	2.7	1812	0.1	0.4	2.3
31.05.2016 10:02:40	7.4	4.3	2.5	7.4	7.3	5.3	1818	3.1	1.8	2.5
31.05.2016 10:02:46	3.2	2.9	2.3	3.2	3.2	3	1824	0.3	0.6	2.3
31.05.2016 10:02:52	1.9	1.9	1.9	1.9	1.9	1.9	1830	0	0	1.9
31.05.2016 10:02:58	1.7	1.7	1.7	1.7	1.7	1.7	1836	0	0	1.7
31.05.2016 10:03:04	4.9	4.3	2.3	42.4	12.6	4.6	1842	0.6	2	2.3
31.05.2016 10:03:10	5.4	2.5	1.8	27	11.9	2.9	1848	2.9	0.7	1.8
31.05.2016 10:03:16	2.3	2.2	1.8	2.3	2.3	2.2	1854	0.1	0.4	1.8
31.05.2016 10:03:22	4.9	2.9	1.9	4.9	4.9	3.5	1860	2	1	1.9
31.05.2016 10:03:28	2.5	2.4	1.8	2.5	2.5	2.4	1866	0.1	0.6	1.8
31.05.2016 10:03:34	2.1	2.1	2.1	2.1	2.1	2.1	1872	0	0	2.1
31.05.2016 10:03:40	7.9	2.7	2.2	7.9	7.1	3.3	1878	5.2	0.5	2.2
31.05.2016 10:03:46	2.5	2.5	2.4	2.5	2.5	2.5	1884	0	0.1	2.4
31.05.2016 10:03:52	2	2	1.9	2	2	2	1890	0	0.1	1.9
31.05.2016 10:03:58	2	2	2	2	2	2	1896	0	0	2
31.05.2016 10:04:04	3.1	3.1	2.4	3.1	3.1	3.1	1902	0	0.7	2.4
31.05.2016 10:04:10	7.2	4.8	3.1	7.2	7.1	5.5	1908	2.4	1.7	3.1
31.05.2016 10:04:16	2.5	2.5	2.5	2.5	2.5	2.5	1914	0	0	2.5
31.05.2016 10:04:22	3.3	3.3	3.3	3.3	3.3	3.3	1920	0	0	3.3
31.05.2016 10:04:28	2.8	2.7	2.2	2.8	2.8	2.8	1926	0.1	0.5	2.2
31.05.2016 10:04:34	2.9	2.9	2.9	2.9	2.9	2.9	1932	0	0	2.9
31.05.2016 10:04:40	5.2	4	2.8	5.2	5.2	4.6	1938	1.2	1.2	2.8
31.05.2016 10:04:46	11.1	3.5	2.6	16.1	10.3	3.7	1944	7.6	0.9	2.6
31.05.2016 10:04:52	3.5	3.2	2.4	3.5	3.5	3.3	1950	0.3	0.8	2.4
31.05.2016 10:04:58	2.8	2.8	2.5	2.8	2.8	2.8	1956	0	0.3	2.5
31.05.2016 10:05:04	2.1	2.1	2	2.1	2.1	2.1	1962	0	0.1	2
31.05.2016 10:05:10	5.1	4.3	2.7	5.1	5.1	4.6	1968	0.8	1.6	2.7
31.05.2016 10:05:16	5.1	4.7	3.3	5.1	5.1	4.9	1974	0.4	1.4	3.3
31.05.2016 10:05:22	3.5	3.5	3.2	3.5	3.5	3.5	1980	0	0.3	3.2
31.05.2016 10:05:28	4.5	3.4	2.5	4.5	4.5	3.9	1986	1.1	0.9	2.5
31.05.2016 10:05:34	9	6.3	3.7	9	8.9	7.5	1992	2.7	2.6	3.7
31.05.2016 10:05:40	5.5	4	2.8	5.5	5.5	4.7	1998	1.5	1.2	2.8
31.05.2016 10:05:46	2.5	2.5	2.5	2.5	2.5	2.5	2004	0	0	2.5
31.05.2016 10:05:52	3.2	3.2	2.8	3.2	3.2	3.2	2010	0	0.4	2.8
31.05.2016 10:05:58	4.9	4.5	2.8	4.9	4.9	4.7	2016	0.4	1.7	2.8
31.05.2016 10:06:04	9.3	3	2.4	9.3	8.5	3.7	2022	6.3	0.6	2.4
31.05.2016 10:06:10	5	3.3	2.6	5	5	4.1	2028	1.7	0.7	2.6
31.05.2016 10:06:16	9.4	5.5	3	9.4	9.3	6.9	2034	3.9	2.5	3
31.05.2016 10:06:22	10	4.8	2.9	10	9.2	5.4	2040	5.2	1.9	2.9
31.05.2016 10:06:28	15.9	4.1	3.3	202.7	18	5.4	2046	11.8	0.8	3.3
31.05.2016 10:06:34	6.2	5	3.5	6.2	6.2	5.5	2052	1.2	1.5	3.5
31.05.2016 10:06:40	6.8	5.5	3.9	6.8	6.8	6.1	2058	1.3	1.6	3.9
31.05.2016 10:06:46	4.2	3.6	2.9	4.2	4.2	3.8	2064	0.6	0.7	2.9
31.05.2016 10:06:52	3.2	3.2	3.1	3.2	3.2	3.2	2070	0	0.1	3.1
31.05.2016 10:06:58	13.4	6.1	4.1	13.7	11.8	6.6	2076	7.3	2	4.1
31.05.2016 10:07:04	15.1	5.3	2.9	15.4	13.4	6.5	2082	9.8	2.4	2.9
31.05.2016 10:07:10	3	3	3	3	3	3	2088	0	0	3
31.05.2016 10:07:16	12.3	4.3	3.8	12.3	11.4	5.8	2094	8	0.5	3.8
31.05.2016 10:07:22	5.4	3.7	3.1	5.4	5.4	4.5	2100	1.7	0.6	3.1
31.05.2016 10:07:28	3.3	3.1	2.4	3.3	3.3	3.2	2106	0.2	0.7	2.4
31.05.2016 10:07:34	4	2.8	2.2	4	4	3.3	2112	1.2	0.6	2.2
31.05.2016 10:07:40	2.2	2.2	2.2	2.2	2.2	2.2	2118	0	0	2.2
31.05.2016 10:07:46	2.9	2.9	2.8	2.9	2.9	2.9	2124	0	0.1	2.8
31.05.2016 10:07:52	12.1	4.1	3.3	12.1	11.2	5.6	2130	8	0.8	3.3

## Sheet: 2OS
date & time	PM10 [ug/m3]	PM2,5 [ug/m3]	PM1 [ug/m3]	Inhalable [ug/m3]	Thoracic [ug/m3]	Alveolic [ug/m3]	Zeit in sek	2.5 bis 10	1 bis 2.5	kleiner 1
31.05.2016 12:29:12	13.8	12.4	11.6	51.4	21.5	13.1	6	1.4	0.8	11.6		Sägedauer	114			Temperature [°C]	Humidity [%rH]
31.05.2016 12:29:18	11.9	8.5	7.9	33.5	18.5	9.6	12	3.4	0.6	7.9						24.86	45.6
31.05.2016 12:29:24	14.4	11.4	8.5	14.4	14.4	12.7	18	3	2.9	8.5						24.86	45.81
31.05.2016 12:29:30	10.2	9.7	8.3	10.2	10.2	9.9	24	0.5	1.4	8.3						26.11	39.76
31.05.2016 12:29:36	12.8	11.2	8.3	12.8	12.8	11.9	30	1.6	2.9	8.3						25.91	39.34
31.05.2016 12:29:42	18.5	9.8	8.7	23.5	17.6	10.5	36	8.7	1.1	8.7						25.63	40.8
31.05.2016 12:29:48	9.6	9.1	8.2	9.6	9.6	9.3	42	0.5	0.9	8.2						25.34	41.85
31.05.2016 12:29:54	16.7	9.9	8.7	16.7	16	10.9	48	6.8	1.2	8.7						25.15	42.89
31.05.2016 12:30:00	12.5	10.2	8.3	12.5	12.5	10.9	54	2.3	1.9	8.3						24.96	44.04
31.05.2016 12:30:06	10.1	7.5	7.1	10.1	10	8.3	60	2.6	0.4	7.1						24.76	45.4
31.05.2016 12:30:12	12.3	12.1	11.1	12.3	12.3	12.1	66	0.2	1	11.1						24.67	45.5
31.05.2016 12:30:18	10	8.8	7.6	10	10	9.4	72	1.2	1.2	7.6						24.57	46.02
31.05.2016 12:30:24	17.5	9.7	8.5	17.8	15.8	10.4	78	7.8	1.2	8.5						24.38	46.75
31.05.2016 12:34:00	18.5	10.1	9.7	18.8	16.8	10.7	84	8.4	0.4	9.7						24.29	47.17
31.05.2016 12:34:06	12.1	11	10.4	12.1	12.1	11.5	90	1.1	0.6	10.4						24.29	46.96
31.05.2016 12:34:12	8.6	8.5	7.9	8.6	8.6	8.5	96	0.1	0.6	7.9						24.09	47.07
31.05.2016 12:34:18	12.2	11.9	10.9	12.2	12.2	12	102	0.3	1	10.9						24.09	46.44
31.05.2016 12:34:24	11	10.9	9.4	11	11	11	108	0.1	1.5	9.4						24	46.23
31.05.2016 12:34:30	20.1	19	17.9	20.1	20.1	19.5	114	1.1	1.1	17.9						24	45.5
31.05.2016 12:34:36	14.2	14.1	13.6	14.2	14.2	14.2	120	0.1	0.5	13.6						23.9	44.46
31.05.2016 12:34:42	14.3	14.3	13.7	14.3	14.3	14.3	126	0	0.6	13.7						23.9	43.73
31.05.2016 12:34:48	12.2	12.2	12.1	12.2	12.2	12.2	132	0	0.1	12.1						23.9	43.73
31.05.2016 12:34:54	14.6	14.6	14.2	14.6	14.6	14.6	138	0	0.4	14.2						23.9	44.35
31.05.2016 12:35:00	9.1	9.1	8.8	9.1	9.1	9.1	144	0	0.3	8.8						23.81	45.5
31.05.2016 12:35:06	10.9	10.8	9.7	10.9	10.9	10.9	150	0.1	1.1	9.7						23.81	46.13
31.05.2016 12:35:12	14.1	14	12.9	14.1	14.1	14.1	156	0.1	1.1	12.9						23.81	47.07
31.05.2016 12:35:18	13.5	10.7	7.9	13.5	13.5	11.9	162	2.8	2.8	7.9						23.81	47.28
31.05.2016 12:35:24	8.9	8.9	8.7	8.9	8.9	8.9	168	0	0.2	8.7						23.81	48.21
31.05.2016 12:35:30	16	12.3	10.1	16	15.7	12.9	174	3.7	2.2	10.1						23.81	48.11
31.05.2016 12:35:36	7.7	7.4	6.6	7.7	7.7	7.5	180	0.3	0.8	6.6						23.81	48.42
31.05.2016 12:35:42	9.6	9.5	8.5	9.6	9.6	9.5	186	0.1	1	8.5						23.81	49.15
31.05.2016 12:35:48	13.9	13.2	11	13.9	13.9	13.5	192	0.7	2.2	11						23.81	48.84
31.05.2016 12:35:54	10	10	9.6	10	10	10	198	0	0.4	9.6						23.81	48.74
31.05.2016 12:36:00	16.7	10.8	9.5	16.7	15.9	11.7	204	5.9	1.3	9.5						23.81	48.53
31.05.2016 12:36:06	8.5	8.5	8.5	8.5	8.5	8.5	210	0	0	8.5						23.81	48.11
31.05.2016 12:36:12	13.1	12.6	10.5	13.1	13.1	12.8	216	0.5	2.1	10.5						23.81	47.59
31.05.2016 12:36:18	12.3	11.3	10.5	12.3	12.3	11.7	222	1	0.8	10.5						23.81	46.23
31.05.2016 12:36:24	10.4	10.4	10.4	10.4	10.4	10.4	228	0	0	10.4						23.81	45.92
31.05.2016 12:36:30	8.2	8.2	8.2	8.2	8.2	8.2	234	0	0	8.2						23.81	45.29
31.05.2016 12:36:36	7.2	7.2	7.2	7.2	7.2	7.2	240	0	0	7.2						23.81	45.4
31.05.2016 12:36:42	26.1	14.9	13.5	26.5	23.7	15.4	246	11.2	1.4	13.5						23.81	46.23
31.05.2016 12:36:48	11.7	11.7	11.4	11.7	11.7	11.7	252	0	0.3	11.4						23.81	47.38
31.05.2016 12:36:54	17.1	10.3	9.3	17.5	15.5	10.6	258	6.8	1	9.3						23.9	47.9
31.05.2016 12:37:00	9.1	9.1	9	9.1	9.1	9.1	264	0	0.1	9						23.9	48.42
31.05.2016 12:37:06	14.7	11.6	9.1	14.7	14.6	12.6	270	3.1	2.5	9.1						23.9	49.05
31.05.2016 12:37:12	8.6	8.6	8.6	8.6	8.6	8.6	276	0	0	8.6						23.9	49.26
31.05.2016 12:37:18	8.8	8.8	8.7	8.8	8.8	8.8	282	0	0.1	8.7						23.9	48.32
31.05.2016 12:37:24	8.5	8.5	8.2	8.5	8.5	8.5	288	0	0.3	8.2						24	48.11
31.05.2016 12:37:30	9.4	9.4	9	9.4	9.4	9.4	294	0	0.4	9						24	48.21
31.05.2016 12:37:36	17.2	10.4	9.7	17.6	15.6	10.7	300	6.8	0.7	9.7						24	47.48
31.05.2016 12:37:42	7.4	7.4	7.1	7.4	7.4	7.4	306	0	0.3	7.1						24	45.19
31.05.2016 12:37:48	10.2	10.2	10	10.2	10.2	10.2	312	0	0.2	10						24	44.77
31.05.2016 12:37:54	8.6	8.6	8.6	8.6	8.6	8.6	318	0	0	8.6						24	43.52
31.05.2016 12:38:00	13	12.6	10.9	13	13	12.8	324	0.4	1.7	10.9
31.05.2016 12:38:06	14.7	14.7	14.4	14.7	14.7	14.7	330	0	0.3	14.4
31.05.2016 12:38:12	14.3	14.3	14.3	14.3	14.3	14.3	336	0	0	14.3
31.05.2016 12:38:18	13.4	13.4	13.4	13.4	13.4	13.4	342	0	0	13.4
31.05.2016 12:38:24	17.6	17.2	15.8	17.6	17.6	17.4	348	0.4	1.4	15.8
31.05.2016 12:38:30	24.7	17.7	17.1	25	23.1	18.1	354	7	0.6	17.1
31.05.2016 12:38:36	24.5	15.3	14.9	67	31.3	15.9	360	9.2	0.4	14.9
31.05.2016 12:38:42	16.9	15.6	14.4	38.5	23.5	15.7	366	1.3	1.2	14.4
31.05.2016 12:38:48	16.1	12.7	12.1	16.1	15.8	13.2	372	3.4	0.6	12.1
31.05.2016 12:38:54	9.1	9.1	9.1	9.1	9.1	9.1	378	0	0	9.1
31.05.2016 12:39:00	10.2	10.1	9.7	10.2	10.2	10.2	384	0.1	0.4	9.7
31.05.2016 12:39:06	11.7	11.7	11.6	11.7	11.7	11.7	390	0	0.1	11.6
31.05.2016 12:39:12	12	10	8.9	12	12	10.9	396	2	1.1	8.9
31.05.2016 12:39:18	11.1	11	10.3	11.1	11.1	11	402	0.1	0.7	10.3
31.05.2016 12:39:24	11.7	11.6	10.9	11.7	11.7	11.6	408	0.1	0.7	10.9
31.05.2016 12:39:30	10.6	10.6	10.6	10.6	10.6	10.6	414	0	0	10.6
31.05.2016 12:39:36	10.6	9.8	8.2	10.6	10.6	10.2	420	0.8	1.6	8.2
31.05.2016 12:39:42	10.9	10.7	9.8	10.9	10.9	10.8	426	0.2	0.9	9.8
31.05.2016 12:39:48	26.2	10.2	9.2	31.5	23.7	11.3	432	16	1	9.2
31.05.2016 12:39:54	20.6	10.8	8.9	42.5	25.5	12	438	9.8	1.9	8.9
31.05.2016 12:40:00	18.8	10.5	7.6	23.7	17.9	10.9	444	8.3	2.9	7.6
31.05.2016 12:40:06	6.7	6.7	6.7	6.7	6.7	6.7	450	0	0	6.7
31.05.2016 12:40:12	9.2	9.2	9.2	9.2	9.2	9.2	456	0	0	9.2
31.05.2016 12:40:18	10.9	10.6	9.9	10.9	10.9	10.7	462	0.3	0.7	9.9
31.05.2016 12:40:24	8.9	8.9	8.9	8.9	8.9	8.9	468	0	0	8.9
31.05.2016 12:40:30	9.7	9.6	9.1	9.7	9.7	9.7	474	0.1	0.5	9.1
31.05.2016 12:40:36	10	10	10	10	10	10	480	0	0	10
31.05.2016 12:40:42	9.6	9.6	9.6	9.6	9.6	9.6	486	0	0	9.6
31.05.2016 12:40:48	9.3	9.3	9.1	9.3	9.3	9.3	492	0	0.2	9.1
31.05.2016 12:40:54	10.4	10.3	9.7	10.4	10.4	10.3	498	0.1	0.6	9.7
31.05.2016 12:41:00	11	10.7	9.4	11	11	10.8	504	0.3	1.3	9.4
31.05.2016 12:41:06	8.8	8.8	8.2	8.8	8.8	8.8	510	0	0.6	8.2
31.05.2016 12:41:12	10.9	9.8	9.2	10.9	10.9	10.3	516	1.1	0.6	9.2
31.05.2016 12:41:18	9.1	9.1	9.1	9.1	9.1	9.1	522	0	0	9.1
31.05.2016 12:41:24	20.1	15	13	77.7	26.2	15.5	528	5.1	2	13
31.05.2016 12:41:30	9.5	9.5	9.2	9.5	9.5	9.5	534	0	0.3	9.2
31.05.2016 12:41:36	12.2	10.8	8.9	12.2	12.2	11.4	540	1.4	1.9	8.9
31.05.2016 12:41:42	12.9	12.9	12.8	12.9	12.9	12.9	546	0	0.1	12.8
31.05.2016 12:41:48	7.7	7.7	7.2	7.7	7.7	7.7	552	0	0.5	7.2
31.05.2016 12:41:54	5.7	5.7	5.7	5.7	5.7	5.7	558	0	0	5.7
31.05.2016 12:42:00	12.2	11.7	9.9	12.2	12.2	11.9	564	0.5	1.8	9.9
31.05.2016 12:42:06	7.3	7.3	7.3	7.3	7.3	7.3	570	0	0	7.3
31.05.2016 12:42:12	9.6	9.4	8.5	9.6	9.6	9.5	576	0.2	0.9	8.5
31.05.2016 12:42:18	11.6	11.6	11.4	11.6	11.6	11.6	582	0	0.2	11.4
31.05.2016 12:42:24	8.2	8.2	8.2	8.2	8.2	8.2	588	0	0	8.2
31.05.2016 12:42:30	9.9	9.9	9.8	9.9	9.9	9.9	594	0	0.1	9.8
31.05.2016 12:42:36	12.4	12.4	12.3	12.4	12.4	12.4	600	0	0.1	12.3
31.05.2016 12:42:42	9.6	9.6	9.6	9.6	9.6	9.6	606	0	0	9.6
31.05.2016 12:42:48	10.8	10.8	10.8	10.8	10.8	10.8	612	0	0	10.8
31.05.2016 12:42:54	10.2	10.2	10.1	10.2	10.2	10.2	618	0	0.1	10.1
31.05.2016 12:43:00	9.5	9.1	8.2	9.5	9.5	9.3	624	0.4	0.9	8.2
31.05.2016 12:43:06	9.5	9.5	9.5	9.5	9.5	9.5	630	0	0	9.5
31.05.2016 12:43:12	9.1	9.1	9.1	9.1	9.1	9.1	636	0	0	9.1
31.05.2016 12:43:18	13.3	13.3	13.3	13.3	13.3	13.3	642	0	0	13.3
31.05.2016 12:43:24	11.5	11.2	10.5	11.5	11.5	11.4	648	0.3	0.7	10.5
31.05.2016 12:43:30	11.3	10.3	9.8	11.3	11.3	10.8	654	1	0.5	9.8
31.05.2016 12:43:36	10	9.5	8.8	10	10	9.7	660	0.5	0.7	8.8
31.05.2016 12:43:42	8.4	8.4	8.2	8.4	8.4	8.4	666	0	0.2	8.2
31.05.2016 12:43:48	8.9	8.9	8.9	8.9	8.9	8.9	672	0	0	8.9
31.05.2016 12:43:54	9.1	9.1	8.9	9.1	9.1	9.1	678	0	0.2	8.9
31.05.2016 12:44:00	18.9	11.7	10.5	19.3	17.3	12.2	684	7.2	1.2	10.5
31.05.2016 12:44:06	9	9	8.9	9	9	9	690	0	0.1	8.9
31.05.2016 12:44:12	14.9	11.2	9	14.9	14.6	11.8	696	3.7	2.2	9
31.05.2016 12:44:18	11.2	9.4	8.8	11.2	11.2	9.8	702	1.8	0.6	8.8
31.05.2016 12:44:24	8.6	8.6	8.6	8.6	8.6	8.6	708	0	0	8.6
31.05.2016 12:44:30	9.3	9.3	9.2	9.3	9.3	9.3	714	0	0.1	9.2
31.05.2016 12:44:36	9.2	9	8.3	9.2	9.2	9.1	720	0.2	0.7	8.3
31.05.2016 12:44:42	8.2	8.2	8	8.2	8.2	8.2	726	0	0.2	8
31.05.2016 12:44:48	10.7	10.7	10.5	10.7	10.7	10.7	732	0	0.2	10.5
31.05.2016 12:44:54	13.7	12	10.4	13.7	13.7	12.8	738	1.7	1.6	10.4
31.05.2016 12:45:00	14.6	14.1	13.4	14.6	14.6	14.3	744	0.5	0.7	13.4
31.05.2016 12:45:06	25.7	12.9	12.4	30.7	24.1	13.6	750	12.8	0.5	12.4
31.05.2016 12:45:12	14.3	13.2	12.2	14.3	14.3	13.7	756	1.1	1	12.2
31.05.2016 12:45:18	22.1	13.4	12.1	27.1	21.3	14	762	8.7	1.3	12.1
31.05.2016 12:45:24	9.9	9.4	8.7	9.9	9.9	9.6	768	0.5	0.7	8.7
31.05.2016 12:45:30	8.1	7.9	7.2	8.1	8.1	8	774	0.2	0.7	7.2
31.05.2016 12:45:36	8.7	8.2	6.8	8.7	8.7	8.4	780	0.5	1.4	6.8
31.05.2016 12:45:42	8.1	8.1	8.1	8.1	8.1	8.1	786	0	0	8.1
31.05.2016 12:45:48	11.3	11.3	11.3	11.3	11.3	11.3	792	0	0	11.3
31.05.2016 12:45:54	9.5	9.5	9.5	9.5	9.5	9.5	798	0	0	9.5
31.05.2016 12:46:00	12.6	11.8	10.3	12.6	12.6	12.2	804	0.8	1.5	10.3
31.05.2016 12:46:06	8.4	8.4	7.9	8.4	8.4	8.4	810	0	0.5	7.9
31.05.2016 12:46:12	7.9	7.8	7.1	7.9	7.9	7.8	816	0.1	0.7	7.1
31.05.2016 12:46:18	7.4	7.4	7.3	7.4	7.4	7.4	822	0	0.1	7.3
31.05.2016 12:46:24	20.2	8.4	8.4	42.2	25.1	9.7	828	11.8	0	8.4
31.05.2016 12:46:30	10.3	9.7	9	10.3	10.3	10	834	0.6	0.7	9
31.05.2016 12:46:36	8.8	8.8	8.5	8.8	8.8	8.8	840	0	0.3	8.5
31.05.2016 12:46:42	7.6	7.6	7.6	7.6	7.6	7.6	846	0	0	7.6
31.05.2016 12:46:48	14.6	11	8.6	14.6	14.5	12.3	852	3.6	2.4	8.6
31.05.2016 12:46:54	8.7	8.7	8.6	8.7	8.7	8.7	858	0	0.1	8.6
31.05.2016 12:47:00	8.1	8.1	8.1	8.1	8.1	8.1	864	0	0	8.1
31.05.2016 12:47:06	12.5	10.7	8	12.5	12.5	11.5	870	1.8	2.7	8
31.05.2016 12:47:12	7.5	7.5	7.5	7.5	7.5	7.5	876	0	0	7.5
31.05.2016 12:47:18	15.2	7.2	5.4	15.5	13.5	8	882	8	1.8	5.4
31.05.2016 12:47:24	7	7	6.8	7	7	7	888	0	0.2	6.8
31.05.2016 12:47:30	7.2	7.2	7.2	7.2	7.2	7.2	894	0	0	7.2
31.05.2016 12:47:36	9.3	9.3	9.2	9.3	9.3	9.3	900	0	0.1	9.2
31.05.2016 12:47:42	11.2	9.4	8.9	193.1	14.2	9.8	906	1.8	0.5	8.9
31.05.2016 12:47:48	10.3	10.1	9.4	10.3	10.3	10.2	912	0.2	0.7	9.4
31.05.2016 12:47:54	11.8	10.6	9.3	11.8	11.8	11.2	918	1.2	1.3	9.3
31.05.2016 12:48:00	7	7	7	7	7	7	924	0	0	7
31.05.2016 12:48:06	27.7	12.6	12.2	37.7	26.1	12.9	930	15.1	0.4	12.2
31.05.2016 12:48:12	15.8	14.1	12.2	15.8	15.8	14.9	936	1.7	1.9	12.2
31.05.2016 12:48:18	12.5	8.1	7.8	12.5	12.3	9.4	942	4.4	0.3	7.8
31.05.2016 12:48:24	13.2	12.1	11.1	13.2	13.2	12.6	948	1.1	1	11.1
31.05.2016 12:48:30	14.2	12.7	11.5	14.2	14.2	13.4	954	1.5	1.2	11.5
31.05.2016 12:48:36	9.2	9.2	9.2	9.2	9.2	9.2	960	0	0	9.2
31.05.2016 12:48:42	9.5	9.5	9.4	9.5	9.5	9.5	966	0	0.1	9.4
31.05.2016 12:48:48	9.1	9.1	8.1	9.1	9.1	9.1	972	0	1	8.1
31.05.2016 12:48:54	19	12.2	11.2	19.3	17.3	12.5	978	6.8	1	11.2
31.05.2016 12:49:00	8.1	8.1	7.6	8.1	8.1	8.1	984	0	0.5	7.6
31.05.2016 12:49:06	10.8	10.5	8.8	10.8	10.8	10.7	990	0.3	1.7	8.8
31.05.2016 12:49:12	11	11	10.5	11	11	11	996	0	0.5	10.5
31.05.2016 12:49:18	9.5	9.5	9.4	9.5	9.5	9.5	1002	0	0.1	9.4
31.05.2016 12:49:24	21.3	12.6	10.8	26.3	20.5	13.2	1008	8.7	1.8	10.8
31.05.2016 12:49:30	8.9	8.9	8.6	8.9	8.9	8.9	1014	0	0.3	8.6
31.05.2016 12:49:36	17.8	10	9.5	60.3	24.7	10.3	1020	7.8	0.5	9.5
31.05.2016 12:49:42	13.9	12.5	10.3	13.9	13.9	13.1	1026	1.4	2.2	10.3
31.05.2016 12:49:48	10.7	10.5	9.6	10.7	10.7	10.6	1032	0.2	0.9	9.6
31.05.2016 12:49:54	9.9	9.9	9.8	9.9	9.9	9.9	1038	0	0.1	9.8
31.05.2016 12:50:00	10.6	10.4	9.7	10.6	10.6	10.5	1044	0.2	0.7	9.7
31.05.2016 12:50:06	9.6	9.6	9.2	9.6	9.6	9.6	1050	0	0.4	9.2
31.05.2016 12:50:12	11.8	11.6	10.8	11.8	11.8	11.7	1056	0.2	0.8	10.8
31.05.2016 12:50:18	8.5	8.5	8.5	8.5	8.5	8.5	1062	0	0	8.5
31.05.2016 12:50:24	10	10	10	10	10	10	1068	0	0	10
31.05.2016 12:50:30	8.9	8.9	8.6	8.9	8.9	8.9	1074	0	0.3	8.6
31.05.2016 12:50:36	9.5	9.5	9	9.5	9.5	9.5	1080	0	0.5	9
31.05.2016 12:50:42	11.7	11.7	11.5	11.7	11.7	11.7	1086	0	0.2	11.5
31.05.2016 12:50:48	11.1	11	10.1	11.1	11.1	11	1092	0.1	0.9	10.1
31.05.2016 12:50:54	10.7	10.4	9.7	10.7	10.7	10.5	1098	0.3	0.7	9.7
31.05.2016 12:51:00	10.5	10.5	10.5	10.5	10.5	10.5	1104	0	0	10.5
31.05.2016 12:51:06	10	10	10	10	10	10	1110	0	0	10
31.05.2016 12:51:12	17.9	15.1	12	17.9	17.9	16.4	1116	2.8	3.1	12
31.05.2016 12:51:18	10.2	9.2	8.4	10.2	10.2	9.7	1122	1	0.8	8.4
31.05.2016 12:51:24	10.8	9.9	9.2	10.8	10.8	10.3	1128	0.9	0.7	9.2
31.05.2016 12:51:30	9.5	9.5	9.5	9.5	9.5	9.5	1134	0	0	9.5
31.05.2016 12:51:36	11.8	11.2	10.1	11.8	11.8	11.5	1140	0.6	1.1	10.1
31.05.2016 12:51:42	15.7	12.3	10.9	15.7	15.4	12.8	1146	3.4	1.4	10.9
31.05.2016 12:51:48	15.8	11.6	10	15.8	15.5	12.4	1152	4.2	1.6	10
31.05.2016 12:51:55	17	13.9	12.7	38.6	23.5	14.4	1158	3.1	1.2	12.7
31.05.2016 12:52:00	12.1	9.4	8.5	12.1	12	10.2	1164	2.7	0.9	8.5
31.05.2016 12:52:06	15.3	12.2	11.2	15.3	15.2	13.6	1170	3.1	1	11.2
31.05.2016 12:52:12	12.4	10.9	9.7	12.4	12.4	11.5	1176	1.5	1.2	9.7
31.05.2016 12:52:18	9.6	9.6	9.4	9.6	9.6	9.6	1182	0	0.2	9.4
31.05.2016 12:52:24	18.5	10.5	8.4	18.8	16.8	11.3	1188	8	2.1	8.4
31.05.2016 12:52:30	10.2	10.2	10	10.2	10.2	10.2	1194	0	0.2	10
31.05.2016 12:52:36	7.3	7.3	7.3	7.3	7.3	7.3	1200	0	0	7.3
31.05.2016 12:52:42	11.1	8.8	6.8	11.1	11	9.4	1206	2.3	2	6.8
31.05.2016 12:52:48	7.8	7.8	7.8	7.8	7.8	7.8	1212	0	0	7.8
31.05.2016 12:52:54	9.6	8.8	7.4	9.6	9.6	9.2	1218	0.8	1.4	7.4
31.05.2016 12:53:00	15.8	7.5	7.2	16.2	14.2	8.5	1224	8.3	0.3	7.2
31.05.2016 12:53:06	9.8	9.7	8.7	9.8	9.8	9.7	1230	0.1	1	8.7
31.05.2016 12:53:12	12.4	11.2	9.5	12.4	12.4	11.7	1236	1.2	1.7	9.5
31.05.2016 12:53:18	10.1	8.6	7.9	10.1	10.1	9.3	1242	1.5	0.7	7.9
31.05.2016 12:53:24	9	9	9	9	9	9	1248	0	0	9
31.05.2016 12:53:30	7.4	7.4	7.3	7.4	7.4	7.4	1254	0	0.1	7.3
31.05.2016 12:53:36	9	8.5	7	9	9	8.7	1260	0.5	1.5	7
31.05.2016 12:53:42	11.8	8.6	7.4	11.8	11.8	9.7	1266	3.2	1.2	7.4
31.05.2016 12:53:48	8.3	7.9	6.5	8.3	8.3	8.1	1272	0.4	1.4	6.5
31.05.2016 12:53:54	11	9.1	7.3	11	11	9.9	1278	1.9	1.8	7.3
31.05.2016 12:54:00	14.5	11.1	9.7	14.5	14.4	12.2	1284	3.4	1.4	9.7
31.05.2016 12:54:06	11.7	11.3	9.6	11.7	11.7	11.5	1290	0.4	1.7	9.6
31.05.2016 12:54:12	11.9	9.7	8.9	11.9	11.8	10.3	1296	2.2	0.8	8.9
31.05.2016 12:54:18	11.6	9.6	9.1	11.6	11.5	10.2	1302	2	0.5	9.1
31.05.2016 12:54:24	7.1	7.1	7.1	7.1	7.1	7.1	1308	0	0	7.1
31.05.2016 12:54:30	11.1	9.5	7.4	11.1	11.1	10.2	1314	1.6	2.1	7.4
31.05.2016 12:54:36	8.3	8.1	7.4	8.3	8.3	8.2	1320	0.2	0.7	7.4
31.05.2016 12:54:42	10.3	8.2	7.5	10.3	10.2	8.8	1326	2.1	0.7	7.5
31.05.2016 12:54:48	7.5	7.5	7	7.5	7.5	7.5	1332	0	0.5	7
31.05.2016 12:54:54	7.2	6.4	5.1	7.2	7.2	6.8	1338	0.8	1.3	5.1
31.05.2016 12:55:00	9.4	6.8	5.9	9.4	9.3	7.6	1344	2.6	0.9	5.9
31.05.2016 12:55:06	8.5	6.6	6.1	8.5	8.4	7.1	1350	1.9	0.5	6.1
31.05.2016 12:55:12	7.5	7.5	7.3	7.5	7.5	7.5	1356	0	0.2	7.3
31.05.2016 12:55:18	8.6	7.6	7	8.6	8.6	8	1362	1	0.6	7
31.05.2016 12:55:24	8.2	6.8	6.2	8.2	8.2	7.4	1368	1.4	0.6	6.2
31.05.2016 12:55:30	6.1	6.1	6	6.1	6.1	6.1	1374	0	0.1	6
31.05.2016 12:55:36	7.2	7.2	7.1	7.2	7.2	7.2	1380	0	0.1	7.1
31.05.2016 12:55:42	14.6	7.4	6.4	14.6	13.8	8.5	1386	7.2	1	6.4
31.05.2016 12:55:48	5.5	5.5	5.1	5.5	5.5	5.5	1392	0	0.4	5.1
31.05.2016 12:55:54	16.1	6.7	5.5	16.4	14.3	7.8	1398	9.4	1.2	5.5
31.05.2016 12:56:00	10.3	7.7	6.6	31.9	16.9	8.4	1404	2.6	1.1	6.6
31.05.2016 12:56:06	6.2	6.2	5.9	6.2	6.2	6.2	1410	0	0.3	5.9
31.05.2016 12:56:12	11.3	9.6	6.9	11.3	11.3	10.3	1416	1.7	2.7	6.9	0
31.05.2016 12:56:18	10.4	7.8	6.9	10.4	10.4	8.6	1422	2.6	0.9	6.9	6
31.05.2016 12:56:24	5.1	5.1	5.1	5.1	5.1	5.1	1428	0	0	5.1	12
31.05.2016 12:56:30	6.3	6.3	6	6.3	6.3	6.3	1434	0	0.3	6	18
31.05.2016 12:56:36	8.5	8.4	7.9	8.5	8.5	8.4	1440	0.1	0.5	7.9	24
31.05.2016 12:56:42	8.9	8.9	8.6	8.9	8.9	8.9	1446	0	0.3	8.6	30
31.05.2016 12:56:48	15.4	13.7	10.5	15.4	15.4	14.4	1452	1.7	3.2	10.5	36
31.05.2016 12:56:54	7.1	6.6	5.9	7.1	7.1	6.9	1458	0.5	0.7	5.9	42
31.05.2016 12:57:00	7	7	6.3	7	7	7	1464	0	0.7	6.3	48
31.05.2016 12:57:06	4.9	4.9	4.8	4.9	4.9	4.9	1470	0	0.1	4.8	54
31.05.2016 12:57:12	8.3	8.3	8.2	8.3	8.3	8.3	1476	0	0.1	8.2	60
31.05.2016 12:57:18	7.3	7.3	6.8	7.3	7.3	7.3	1482	0	0.5	6.8	66
31.05.2016 12:57:24	9.2	8.8	7.3	9.2	9.2	9	1488	0.4	1.5	7.3	72
31.05.2016 12:57:30	6.3	6.1	5.3	6.3	6.3	6.2	1494	0.2	0.8	5.3	78
31.05.2016 12:57:36	7.4	7.4	7.3	7.4	7.4	7.4	1500	0	0.1	7.3	84
31.05.2016 12:57:42	17.1	7.7	7	17.5	15.4	8.8	1506	9.4	0.7	7	90
31.05.2016 12:57:48	8.9	7.6	6.5	8.9	8.9	8.2	1512	1.3	1.1	6.5	96
31.05.2016 12:57:54	10.6	9.9	7.7	10.6	10.6	10.2	1518	0.7	2.2	7.7	102
31.05.2016 12:58:00	11	8.5	7.1	11	11	9.6	1524	2.5	1.4	7.1	108
31.05.2016 12:58:06	7	5.9	5.4	7	7	6.4	1530	1.1	0.5	5.4	114
31.05.2016 12:58:12	6.6	6.6	6.1	6.6	6.6	6.6	1536	0	0.5	6.1	120
31.05.2016 12:58:18	11.3	8.5	7.3	32.9	17.9	9.3	1542	2.8	1.2	7.3	126
31.05.2016 12:58:24	6.4	6.4	5.8	6.4	6.4	6.4	1548	0	0.6	5.8	132
31.05.2016 12:58:30	5.3	5.3	5.3	5.3	5.3	5.3	1554	0	0	5.3	138
31.05.2016 12:58:36	9.5	7.7	6.9	9.5	9.5	8.2	1560	1.8	0.8	6.9	144
31.05.2016 12:58:42	5	5	5	5	5	5	1566	0	0	5	150
31.05.2016 12:58:48	4.8	4.8	4.8	4.8	4.8	4.8	1572	0	0	4.8	156
31.05.2016 12:58:54	5.8	5.3	4.6	5.8	5.8	5.5	1578	0.5	0.7	4.6	162
31.05.2016 12:59:00	6	5.5	4.7	6	6	5.7	1584	0.5	0.8	4.7	168
31.05.2016 12:59:06	7.1	6.9	5.9	7.1	7.1	7	1590	0.2	1	5.9	174
31.05.2016 12:59:12	5.3	5.3	5.3	5.3	5.3	5.3	1596	0	0	5.3	180
31.05.2016 12:59:18	7.2	6.7	5.9	7.2	7.2	7	1602	0.5	0.8	5.9	186
31.05.2016 12:59:24	4.8	4.6	3.9	4.8	4.8	4.7	1608	0.2	0.7	3.9	192
31.05.2016 12:59:30	7.4	5.5	4.8	7.4	7.3	6	1614	1.9	0.7	4.8	198
31.05.2016 12:59:36	8.3	5.9	5.4	8.3	8.2	6.6	1620	2.4	0.5	5.4	204
31.05.2016 12:59:42	6.2	6.2	5.9	6.2	6.2	6.2	1626	0	0.3	5.9	210
31.05.2016 12:59:48	4.7	4.7	4.6	4.7	4.7	4.7	1632	0	0.1	4.6	216
31.05.2016 12:59:54	5.9	5.9	5.8	5.9	5.9	5.9	1638	0	0.1	5.8	222
31.05.2016 13:00:00	8	6.8	6.1	8	8	7.4	1644	1.2	0.7	6.1	228
31.05.2016 13:00:06	8.3	8.3	8.3	8.3	8.3	8.3	1650	0	0	8.3	234
31.05.2016 13:00:12	27.7	12.9	11.4	33	25.2	13.5	1656	14.8	1.5	11.4	240
31.05.2016 13:00:18	12.7	12.6	11.9	12.7	12.7	12.6	1662	0.1	0.7	11.9	246
31.05.2016 13:00:24	13.7	13.5	12.5	13.7	13.7	13.6	1668	0.2	1	12.5	252
31.05.2016 13:00:30	14.1	14.1	13.1	14.1	14.1	14.1	1674	0	1	13.1	258
31.05.2016 13:00:36	21.3	21.2	20.8	21.3	21.3	21.2	1680	0.1	0.4	20.8	264
31.05.2016 13:00:42	18.7	15.2	13.9	18.7	18.4	15.7	1686	3.5	1.3	13.9	270
31.05.2016 13:00:48	13.5	13.5	12.9	13.5	13.5	13.5	1692	0	0.6	12.9	276
31.05.2016 13:00:54	17.3	17.3	17.1	17.3	17.3	17.3	1698	0	0.2	17.1	282
31.05.2016 13:01:00	18	16.8	15.6	18	18	17.4	1704	1.2	1.2	15.6	288
31.05.2016 13:01:06	23.1	21.2	19.8	23.1	23.1	22.1	1710	1.9	1.4	19.8	294
31.05.2016 13:01:12	23.1	22.6	21.7	23.1	23.1	22.9	1716	0.5	0.9	21.7	300
31.05.2016 13:01:18	25.2	18.8	18.1	25.2	24.6	19.7	1722	6.4	0.7	18.1	306
31.05.2016 13:01:24	41.2	38.5	36.2	41.2	41.1	39.3	1728	2.7	2.3	36.2	312
31.05.2016 13:01:30	31.3	28	27.1	31.3	31	28.5	1734	3.3	0.9	27.1	318
31.05.2016 13:01:36	48.2	36.6	34.2	53.2	47.3	38.2	1740	11.6	2.4	34.2	324
31.05.2016 13:01:42	95.8	28.9	22.1	116	88.3	36.2	1746	66.9	6.8	22.1	330
31.05.2016 13:01:48	110.4	58.1	25.2	158.9	119.7	70.6	1752	52.3	32.9	25.2	336
31.05.2016 13:01:54	169.3	37.5	15.9	407.6	186.5	58.7	1758	131.8	21.6	15.9	342
31.05.2016 13:02:00	179.8	27	17.7	276.2	180	44.4	1764	152.8	9.3	17.7	348
31.05.2016 13:02:06	160.8	71.3	26.1	367.5	156.6	87	1770	89.5	45.2	26.1	354
31.05.2016 13:02:12	219.3	56.7	24.9	380	235.3	83.3	1776	162.6	31.8	24.9	360
31.05.2016 13:02:18	237.1	66.6	23.3	405.9	260.6	99.7	1782	170.5	43.3	23.3	366
31.05.2016 13:02:24	243.1	42.5	20.3	637	243.4	75.1	1788	200.6	22.2	20.3	372
31.05.2016 13:02:30	171.4	40.8	20.7	231.3	169.7	61.3	1794	130.6	20.1	20.7	378
31.05.2016 13:02:36	158.2	42	20.3	233.7	159.6	62	1800	116.2	21.7	20.3	384
31.05.2016 13:02:42	128.9	32.2	16.3	203.3	134.4	49.5	1806	96.7	15.9	16.3	390
31.05.2016 13:02:48	128.6	38.7	18	198.4	133.5	52.7	1812	89.9	20.7	18	396
31.05.2016 13:02:54	136.4	44.5	20.4	151.7	129	62.9	1818	91.9	24.1	20.4	402
31.05.2016 13:03:00	188	44.4	30	271.2	180.5	66.7	1824	143.6	14.4	30	408
31.05.2016 13:03:06	176.9	59.9	30.2	299.8	174.8	81.7	1830	117	29.7	30.2	414
31.05.2016 13:03:12	186.9	55.8	29.1	257.7	186	78.4	1836	131.1	26.7	29.1	420
31.05.2016 13:03:18	155.3	47.8	29.9	242	165.6	69.7	1842	107.5	17.9	29.9	426
31.05.2016 13:03:24	244	67.8	27.6	386	251.3	103.3	1848	176.2	40.2	27.6	432
31.05.2016 13:03:30	209.3	67.2	27.6	382.7	213.2	88.8	1854	142.1	39.6	27.6	438
31.05.2016 13:03:36	224.4	71.5	36	303.7	214.3	97.8	1860	152.9	35.5	36	444
31.05.2016 13:03:42	266.1	71.7	39.7	373.7	265.5	103.8	1866	194.4	32	39.7	450
31.05.2016 13:03:48	233.2	66.3	45.4	324.9	238.3	97.5	1872	166.9	20.9	45.4	456
31.05.2016 13:03:54	193.6	60.2	37.9	369.5	214.5	83.7	1878	133.4	22.3	37.9	462
31.05.2016 13:04:00	229.8	83	48.3	499.3	252	113.8	1884	146.8	34.7	48.3	468
31.05.2016 13:04:06	272.9	55.5	42.9	492.7	291.3	81.5	1890	217.4	12.6	42.9	474
31.05.2016 13:04:12	222.1	68.8	39.6	348.6	227.8	95	1896	153.3	29.2	39.6	480
31.05.2016 13:04:18	223.3	83.3	50	235	207.7	107.3	1902	140	33.3	50	486
31.05.2016 13:04:24	160.2	74.4	64	204.8	163.6	90.7	1908	85.8	10.4	64	492
31.05.2016 13:04:30	204.1	81.8	56.7	237.4	196.1	102.3	1914	122.3	25.1	56.7	498
31.05.2016 13:04:36	188	72.9	58	284.7	197.7	94.1	1920	115.1	14.9	58	504
31.05.2016 13:04:42	149.5	52.2	39.4	209.2	143.2	68.7	1926	97.3	12.8	39.4	510
31.05.2016 13:04:48	196.6	77.3	51.2	342.5	197.8	92.9	1932	119.3	26.1	51.2	516
31.05.2016 13:04:54	175.2	76.1	56.9	241.7	181.8	92.4	1938	99.1	19.2	56.9	522
31.05.2016 13:05:00	153.2	68.3	50.7	213.3	156.9	83.6	1944	84.9	17.6	50.7	528
31.05.2016 13:05:06	138.2	63	48.7	144.6	129.1	75.8	1950	75.2	14.3	48.7	534
31.05.2016 13:05:12	155.9	67.5	45.7	188.1	154.7	84.7	1956	88.4	21.8	45.7	540
31.05.2016 13:05:18	87.5	46.4	41.5	130.3	91.9	55.6	1962	41.1	4.9	41.5	546
31.05.2016 13:05:24	116.8	60.5	47.7	181.2	125.2	70.2	1968	56.3	12.8	47.7	552
31.05.2016 13:05:30	102.2	60.5	46.2	164.8	107.3	72	1974	41.7	14.3	46.2	558
31.05.2016 13:05:36	84.2	57.4	45	205.4	94.3	64.1	1980	26.8	12.4	45	564
31.05.2016 13:05:42	110.7	64.4	48.6	154.9	118.6	74.5	1986	46.3	15.8	48.6	570
31.05.2016 13:05:48	140.6	50.1	43.6	198.7	137.4	60.6	1992	90.5	6.5	43.6	576
31.05.2016 13:05:54	83	44.1	37.8	105	86.3	52.7	1998	38.9	6.3	37.8	582
31.05.2016 13:06:00	99.8	47.5	37.8	169.2	110	58	2004	52.3	9.7	37.8	588
31.05.2016 13:06:06	116.3	54.5	41.1	126.6	111.5	66.9	2010	61.8	13.4	41.1	594
31.05.2016 13:06:12	122.3	52.8	41.7	123.3	113.2	63.8	2016	69.5	11.1	41.7	600
31.05.2016 13:06:18	116.8	47.3	40.4	260.5	130.1	56.3	2022	69.5	6.9	40.4	606
31.05.2016 13:06:24	94.1	43.6	38.3	125.6	96.7	52.3	2028	50.5	5.3	38.3	612
31.05.2016 13:06:30	78.7	40.9	34.4	88.7	75.3	47.2	2034	37.8	6.5	34.4	618
31.05.2016 13:06:36	81.4	43.6	36	181.9	91.7	50	2040	37.8	7.6	36	624
31.05.2016 13:06:42	89.8	47.1	36.5	99.7	86.5	54.1	2046	42.7	10.6	36.5	630
31.05.2016 13:06:48	104.3	48.8	37.9	114.6	98.8	57.5	2052	55.5	10.9	37.9	636
31.05.2016 13:06:54	87.5	44.5	34.6	119.4	89.7	50.9	2058	43	9.9	34.6	642
31.05.2016 13:07:00	93.8	48.7	36.9	116.1	95.5	58	2064	45.1	11.8	36.9	648
31.05.2016 13:07:06	91	46.3	35.9	117.9	94.6	57.3	2070	44.7	10.4	35.9	654
31.05.2016 13:07:12	84.1	39	32.2	94	80.2	46.8	2076	45.1	6.8	32.2	660
31.05.2016 13:07:18	54.1	36.6	32	54.1	53.2	41	2082	17.5	4.6	32	666
31.05.2016 13:07:24	76.1	42.6	35.5	176	77.2	48.6	2088	33.5	7.1	35.5	672
31.05.2016 13:07:30	65.2	44.7	38.7	65.6	63	49.1	2094	20.5	6	38.7	678
31.05.2016 13:07:36	69.2	49.2	37.6	69.2	68.7	56	2100	20	11.6	37.6	684
31.05.2016 13:07:42	72.6	51.1	43.2	110.4	77.9	55.2	2106	21.5	7.9	43.2	690
31.05.2016 13:07:48	63.5	42.5	37.1	106.7	76.1	49.2	2112	21	5.4	37.1	696
31.05.2016 13:07:54	67.7	50.3	41.3	67.7	66.6	54.9	2118	17.4	9	41.3	702
31.05.2016 13:08:00	95.4	52.8	41.8	139.3	103.2	59.5	2124	42.6	11	41.8	708
31.05.2016 13:08:06	76.5	44.3	39.5	81.5	74.9	52.3	2130	32.2	4.8	39.5	714
31.05.2016 13:08:12	88.8	55.8	46.4	89.5	84.9	62.1	2136	33	9.4	46.4
31.05.2016 13:08:18	88.5	61.2	50.8	89.2	84.8	66.2	2142	27.3	10.4	50.8
31.05.2016 13:08:24	94.8	47.6	40.4	100.5	88.6	54.8	2148	47.2	7.2	40.4
31.05.2016 13:08:30	79.7	55	46.6	80	77.5	61.2	2154	24.7	8.4	46.6
31.05.2016 13:08:36	60.6	45	36.3	60.6	60.3	51.2	2160	15.6	8.7	36.3
31.05.2016 13:08:42	85.2	41.5	36.3	100.2	81.6	48.2	2166	43.7	5.2	36.3
31.05.2016 13:08:48	73.2	40.1	37.3	78.6	69.3	44.9	2172	33.1	2.8	37.3
31.05.2016 13:08:54	82.2	44.5	39.8	87.5	77.4	49	2178	37.7	4.7	39.8
31.05.2016 13:09:00	62.1	42	38.3	62.5	59.5	45.4	2184	20.1	3.7	38.3
31.05.2016 13:09:06	68.7	43.5	38.1	69	65.7	47.8	2190	25.2	5.4	38.1
31.05.2016 13:09:12	55.3	43.7	39.1	55.6	53.6	46.2	2196	11.6	4.6	39.1
31.05.2016 13:09:18	63.2	45.7	38.4	84.8	69	50.3	2202	17.5	7.3	38.4
31.05.2016 13:09:24	62.7	42.8	41.2	62.7	60.1	45.7	2208	19.9	1.6	41.2
31.05.2016 13:09:30	61.7	44.7	38.9	61.7	60.1	48.5	2214	17	5.8	38.9
31.05.2016 13:09:36	63.4	43.2	40.3	126	67.8	45.6	2220	20.2	2.9	40.3
31.05.2016 13:09:42	60.9	40.7	35.6	98.8	66.6	45.2	2226	20.2	5.1	35.6
31.05.2016 13:09:48	52.4	42.7	36.6	52.8	50.8	44.3	2232	9.7	6.1	36.6
31.05.2016 13:09:54	63	39.8	36.8	68	60.4	42.8	2238	23.2	3	36.8
31.05.2016 13:10:00	61.8	38.5	34.2	61.8	59.4	42.3	2244	23.3	4.3	34.2
31.05.2016 13:10:06	66.6	43.4	40	71.9	63.2	45.7	2250	23.2	3.4	40
31.05.2016 13:10:12	44.8	41.9	36	82.3	52.5	43.2	2256	2.9	5.9	36
31.05.2016 13:10:18	65.5	50.1	43.5	65.5	64.7	54.2	2262	15.4	6.6	43.5
31.05.2016 13:10:24	67.1	57.5	51.6	67.1	66.6	60.4	2268	9.6	5.9	51.6
31.05.2016 13:10:30	74.6	55.7	48.6	74.6	73.3	60.4	2274	18.9	7.1	48.6
31.05.2016 13:10:36	68.9	45.1	40.2	73.8	66.8	49	2280	23.8	4.9	40.2
31.05.2016 13:10:42	36.2	36.1	34.7	36.2	36.2	36.1	2286	0.1	1.4	34.7
31.05.2016 13:10:48	42.4	33.1	30.8	47.4	41.6	34	2292	9.3	2.3	30.8
31.05.2016 13:10:54	47.9	38.7	35.1	47.9	47.5	41.8	2298	9.2	3.6	35.1
31.05.2016 13:11:00	62.7	43.1	39.4	63.1	60.4	46.7	2304	19.6	3.7	39.4
31.05.2016 13:11:06	54	41.6	37.7	58.9	53	43.5	2310	12.4	3.9	37.7
31.05.2016 13:11:12	54.6	36.4	32.3	55	52.1	39.7	2316	18.2	4.1	32.3
31.05.2016 13:11:18	24.9	24.8	24.2	24.9	24.9	24.8	2322	0.1	0.6	24.2
31.05.2016 13:11:24	36	25.5	23.9	36.3	34.3	27.1	2328	10.5	1.6	23.9
31.05.2016 13:11:30	54.5	36.4	33.9	54.8	52.1	39	2334	18.1	2.5	33.9
31.05.2016 13:11:36	56.6	43.1	40.6	99.1	63.3	45.2	2340	13.5	2.5	40.6
31.05.2016 13:11:42	55.4	44	41.9	77	61.3	46.3	2346	11.4	2.1	41.9
31.05.2016 13:11:48	61.3	47.4	43.5	98.8	67.9	50.4	2352	13.9	3.9	43.5
31.05.2016 13:11:54	62.7	47.7	41	84.2	68.7	51.8	2358	15	6.7	41
31.05.2016 13:12:00	74.7	61.2	57.4	79.7	73.7	63.3	2364	13.5	3.8	57.4
31.05.2016 13:12:06	65.3	62.7	58.1	65.3	65.3	63.9	2370	2.6	4.6	58.1
31.05.2016 13:12:12	61.6	52.3	50	61.6	61	54.5	2376	9.3	2.3	50
31.05.2016 13:12:18	63.2	40.8	39.1	73.2	61.3	43.2	2382	22.4	1.7	39.1
31.05.2016 13:12:24	54.6	38.7	35	59.6	53.6	41.9	2388	15.9	3.7	35
31.05.2016 13:12:30	48.9	35.4	33.4	175.1	59.8	37.4	2394	13.5	2	33.4
31.05.2016 13:12:36	36.2	33.1	30	36.2	36.1	34.1	2400	3.1	3.1	30
31.05.2016 13:12:42	32.2	27.9	26.3	32.2	31.9	28.8	2406	4.3	1.6	26.3
31.05.2016 13:12:48	33.8	30.2	28.2	33.8	33.7	31.1	2412	3.6	2	28.2
31.05.2016 13:12:54	26.9	26.7	25.3	26.9	26.9	26.8	2418	0.2	1.4	25.3
31.05.2016 13:13:00	34.1	29.6	26.7	34.1	34	30.9	2424	4.5	2.9	26.7
31.05.2016 13:13:06	32.8	27.6	25.2	32.8	32.7	29.6	2430	5.2	2.4	25.2
31.05.2016 13:13:12	25.3	25.2	24.3	25.3	25.3	25.2	2436	0.1	0.9	24.3
31.05.2016 13:13:18	28.5	26.7	25.8	28.5	28.5	27.1	2442	1.8	0.9	25.8
31.05.2016 13:13:24	30.6	27.1	25.9	30.6	30.5	28.7	2448	3.5	1.2	25.9
31.05.2016 13:13:30	35.2	26	23.4	56.8	40.9	27.5	2454	9.2	2.6	23.4
31.05.2016 13:13:36	22.2	22.2	21.2	22.2	22.2	22.1	2460	0	1	21.2
31.05.2016 13:13:42	27.1	24.7	23.4	27.1	27.1	25.8	2466	2.4	1.3	23.4
31.05.2016 13:13:48	32.6	30.1	27.3	32.6	32.6	31.2	2472	2.5	2.8	27.3
31.05.2016 13:13:54	31.9	23.2	22.1	32.2	30.2	23.9	2478	8.7	1.1	22.1
31.05.2016 13:14:00	27.9	24.8	22.5	27.9	27.9	26.2	2484	3.1	2.3	22.5
31.05.2016 13:14:06	37.3	27.8	24	37.7	35.6	29	2490	9.5	3.8	24
31.05.2016 13:14:12	26.1	26.1	25.9	26.1	26.1	26.1	2496	0	0.2	25.9
31.05.2016 13:14:18	36.6	28.8	28	37	35	29.6	2502	7.8	0.8	28
31.05.2016 13:14:24	36.5	31.1	27.7	36.5	36.2	32.5	2508	5.4	3.4	27.7
31.05.2016 13:14:30	31.7	28.9	28.4	53.3	38.3	29.7	2514	2.8	0.5	28.4
31.05.2016 13:14:36	31.3	30.2	28.2	31.3	31.3	30.7	2520	1.1	2	28.2
31.05.2016 13:14:42	30.2	30.2	30.1	30.2	30.2	30.2	2526	0	0.1	30.1
31.05.2016 13:14:48	32.6	26.9	26.2	32.6	32.3	28.4	2532	5.7	0.7	26.2
31.05.2016 13:14:54	29.7	26.2	24.5	29.7	29.6	27	2538	3.5	1.7	24.5
31.05.2016 13:15:00	35.9	31.4	29.3	35.9	35.8	33.1	2544	4.5	2.1	29.3
31.05.2016 13:15:06	27.3	26.6	24.9	27.3	27.3	26.9	2550	0.7	1.7	24.9
31.05.2016 13:15:12	27.9	25.8	24.5	27.9	27.9	26.4	2556	2.1	1.3	24.5
31.05.2016 13:15:18	34.2	31	28.8	34.2	34.2	32.4	2562	3.2	2.2	28.8
31.05.2016 13:15:24	50.9	33.9	32.8	60.9	49.2	34.7	2568	17	1.1	32.8
31.05.2016 13:15:30	34.2	28.4	27.1	34.2	33.8	29.6	2574	5.8	1.3	27.1
31.05.2016 13:15:36	41.9	40.3	38	41.9	41.9	41	2580	1.6	2.3	38
31.05.2016 13:15:42	45.3	29.4	27.6	50.3	44.2	32.2	2586	15.9	1.8	27.6
31.05.2016 13:15:48	36.6	30.9	29.1	36.6	36.2	32.1	2592	5.7	1.8	29.1
31.05.2016 13:15:54	35.1	29.4	28.7	35.1	34.3	30.2	2598	5.7	0.7	28.7
31.05.2016 13:16:00	36.5	35.4	34.2	36.5	36.5	35.9	2604	1.1	1.2	34.2
31.05.2016 13:16:06	33.4	33.3	32.6	33.4	33.4	33.4	2610	0.1	0.7	32.6
31.05.2016 13:16:12	42.2	33.8	33.2	42.5	40.5	34.4	2616	8.4	0.6	33.2
31.05.2016 13:16:18	36.3	34.7	32.7	36.3	36.3	35.4	2622	1.6	2	32.7
31.05.2016 13:16:24	44.8	44.1	41.6	44.8	44.8	44.4	2628	0.7	2.5	41.6
31.05.2016 13:16:30	44.2	44.2	43.8	44.2	44.2	44.2	2634	0	0.4	43.8
31.05.2016 13:16:36	60.9	58.4	56.2	60.9	60.8	59.5	2640	2.5	2.2	56.2
31.05.2016 13:16:42	53	52.5	50.1	53	53	52.7	2646	0.5	2.4	50.1
31.05.2016 13:16:48	56.5	49.9	49.6	56.5	56.3	51.8	2652	6.6	0.3	49.6
31.05.2016 13:16:54	50.9	45.1	44.4	50.9	50.8	47.3	2658	5.8	0.7	44.4
31.05.2016 13:17:00	39.3	37.4	36.3	39.3	39.2	38.2	2664	1.9	1.1	36.3
31.05.2016 13:17:06	56.7	39.3	38.3	66.6	55	40.6	2670	17.4	1	38.3
31.05.2016 13:17:12	51.9	46.2	41.2	51.9	51.5	47.7	2676	5.7	5	41.2
31.05.2016 13:17:18	55.7	43.3	42.3	56	53.7	44.7	2682	12.4	1	42.3
31.05.2016 13:17:24	50.9	45.3	43.3	50.9	50.7	47	2688	5.6	2	43.3
31.05.2016 13:17:30	42.9	42.5	41.4	42.9	42.9	42.7	2694	0.4	1.1	41.4
31.05.2016 13:17:36	47.4	38.7	36.3	52.3	46.5	39.4	2700	8.7	2.4	36.3
31.05.2016 13:17:42	42.7	40.6	37.5	42.7	42.6	41.5	2706	2.1	3.1	37.5
31.05.2016 13:17:48	45.8	41.8	39	45.8	45.7	43.2	2712	4	2.8	39
31.05.2016 13:17:54	49.2	38.5	38.1	54.1	48.3	40	2718	10.7	0.4	38.1
31.05.2016 13:18:00	41	39.5	38.4	41	40.9	40.2	2724	1.5	1.1	38.4
31.05.2016 13:18:06	48.3	39	38	53.3	47.4	39.9	2730	9.3	1	38
31.05.2016 13:18:12	37.7	35.1	34	37.7	37.7	36.3	2736	2.6	1.1	34
31.05.2016 13:18:18	41.1	39.9	37.6	41.1	41.1	40.5	2742	1.2	2.3	37.6
31.05.2016 13:18:24	33.7	31.6	30.6	33.7	33.7	32.2	2748	2.1	1	30.6
31.05.2016 13:18:30	43.9	31.4	28.7	43.9	42.5	33.2	2754	12.5	2.7	28.7
31.05.2016 13:18:36	27.9	27.9	27.9	27.9	27.9	27.9	2760	0	0	27.9
31.05.2016 13:18:42	38.6	33	32.3	38.6	37.8	33.8	2766	5.6	0.7	32.3
31.05.2016 13:18:48	33.2	31.8	30.1	33.2	33.2	32.4	2772	1.4	1.7	30.1
31.05.2016 13:18:54	24.8	24.8	24.3	24.8	24.8	24.8	2778	0	0.5	24.3
31.05.2016 13:19:00	30.2	28.5	25.9	30.2	30.2	29.3	2784	1.7	2.6	25.9
31.05.2016 13:19:06	29.2	27.4	26.7	29.2	29.1	27.8	2790	1.8	0.7	26.7
31.05.2016 13:19:12	44.6	43.6	40.3	44.6	44.6	44	2796	1	3.3	40.3
31.05.2016 13:19:18	32.6	27.9	26.3	32.6	32.4	29.3	2802	4.7	1.6	26.3
31.05.2016 13:19:24	32.6	30.4	29.6	32.6	32.5	31	2808	2.2	0.8	29.6
31.05.2016 13:19:30	27.1	26.1	25.4	27.1	27.1	26.6	2814	1	0.7	25.4
31.05.2016 13:19:36	35.8	27.2	26.4	35.8	34.9	28.9	2820	8.6	0.8	26.4
31.05.2016 13:19:42	35.4	28.4	27	35.7	33.8	28.8	2826	7	1.4	27
31.05.2016 13:19:48	31.1	27.1	26	31.1	30.8	27.9	2832	4	1.1	26
31.05.2016 13:19:54	35.9	31.7	31.3	35.9	35.7	32.9	2838	4.2	0.4	31.3
31.05.2016 13:20:00	41.8	38	36.5	41.8	41.5	38.7	2844	3.8	1.5	36.5
31.05.2016 13:20:06	38.6	32.4	31.2	38.6	37.9	33.1	2850	6.2	1.2	31.2
31.05.2016 13:20:12	30.1	30.1	29.3	30.1	30.1	30.1	2856	0	0.8	29.3
31.05.2016 13:20:18	31.7	31.7	30.6	31.7	31.7	31.7	2862	0	1.1	30.6
31.05.2016 13:20:24	35.8	30.4	30.1	35.8	35.5	31.8	2868	5.4	0.3	30.1
31.05.2016 13:20:30	34.2	34.2	33.5	34.2	34.2	34.2	2874	0	0.7	33.5
31.05.2016 13:20:36	40	36.3	32.2	40	39.9	37.6	2880	3.7	4.1	32.2
31.05.2016 13:20:42	32.7	32.7	32.6	32.7	32.7	32.7	2886	0	0.1	32.6
31.05.2016 13:20:48	36.4	34.3	32.9	36.4	36.3	34.9	2892	2.1	1.4	32.9
31.05.2016 13:20:54	38.3	36.9	36.3	38.3	38.3	37.5	2898	1.4	0.6	36.3
31.05.2016 13:21:00	37	34.6	33.8	37	36.9	35.3	2904	2.4	0.8	33.8
31.05.2016 13:21:06	35.7	34.5	33	35.7	35.7	35	2910	1.2	1.5	33
31.05.2016 13:21:12	37.7	37.6	36.8	37.7	37.7	37.6	2916	0.1	0.8	36.8
31.05.2016 13:21:18	43.9	43	40.1	43.9	43.9	43.4	2922	0.9	2.9	40.1
31.05.2016 13:21:24	39.9	37.7	37.3	61.5	46.5	38.2	2928	2.2	0.4	37.3
31.05.2016 13:21:30	41.6	41.4	40.4	41.6	41.6	41.5	2934	0.2	1	40.4
31.05.2016 13:21:36	44.3	36.2	34.6	44.6	42.6	37.1	2940	8.1	1.6	34.6
31.05.2016 13:21:42	37.4	36.4	35.8	37.4	37.4	36.8	2946	1	0.6	35.8
31.05.2016 13:21:48	36.6	35.8	34.1	36.6	36.6	36.2	2952	0.8	1.7	34.1
31.05.2016 13:21:54	35.4	34.6	31.9	35.4	35.4	34.9	2958	0.8	2.7	31.9
31.05.2016 13:22:00	44.7	34.5	32.9	45	42.7	35.3	2964	10.2	1.6	32.9
31.05.2016 13:22:06	33.5	33.2	32.2	33.5	33.5	33.3	2970	0.3	1	32.2
31.05.2016 13:22:12	32.8	32.7	31.8	32.8	32.8	32.7	2976	0.1	0.9	31.8
31.05.2016 13:22:18	36.4	36.2	34.2	36.4	36.4	36.3	2982	0.2	2	34.2
31.05.2016 13:22:24	37.4	36.9	36.1	37.4	37.4	37.1	2988	0.5	0.8	36.1
31.05.2016 13:22:30	35.9	34.8	32.8	35.9	35.9	35.3	2994	1.1	2	32.8
31.05.2016 13:22:36	33.5	33.2	32.4	33.5	33.5	33.3	3000	0.3	0.8	32.4
31.05.2016 13:22:42	36.2	33.8	31.7	36.2	36.2	34.5	3006	2.4	2.1	31.7
31.05.2016 13:22:48	35.8	30.7	29	35.8	35.4	31.6	3012	5.1	1.7	29
31.05.2016 13:22:54	45	43.7	41.8	45	45	44.3	3018	1.3	1.9	41.8
31.05.2016 13:23:00	37.5	37.5	37.4	37.5	37.5	37.5	3024	0	0.1	37.4

## Sheet: 5OS
date & time	PM10 [ug/m3]	PM2,5 [ug/m3]	PM1 [ug/m3]	Inhalable [ug/m3]	Thoracic [ug/m3]	Alveolic [ug/m3]	Zeit in sek	2.5 bis 10	1 bis 2.5	kleiner 1
01.06.2016 14:08:07	32.5	31	28.1	32.5	32.5	31.7	6	1.5	2.9	28.1		Sägedauer	42				Temperature [°C]	Humidity [%rH]
01.06.2016 14:08:13	33.4	31	29.1	91	40.3	32	12	2.4	1.9	29.1							25.34	52.7
01.06.2016 14:08:19	31.3	31.3	31	31.3	31.3	31.3	18	0	0.3	31							25.15	52.39
01.06.2016 14:08:25	36.1	36.1	35.6	36.1	36.1	36.1	24	0	0.5	35.6							24.96	53.02
01.06.2016 14:08:31	49	38.6	36.1	49	48	40.4	30	10.4	2.5	36.1							24.86	52.91
01.06.2016 14:08:37	59.6	40.7	39.1	60.3	55.6	42	36	18.9	1.6	39.1							24.67	53.02
01.06.2016 14:08:43	40.1	37.5	36.5	40.1	40.1	38.7	42	2.6	1	36.5							24.48	51.87
01.06.2016 14:08:49	32.9	32.9	31.9	32.9	32.9	32.9	48	0	1	31.9							24.38	49.47
01.06.2016 14:08:55	43.2	41.8	38.8	43.2	43.2	42.4	54	1.4	3	38.8							24.19	50.09
01.06.2016 14:09:01	43.2	41.4	38.8	43.2	43.2	42.2	60	1.8	2.6	38.8							24.09	51.66
01.06.2016 14:09:07	47.3	36.4	33.6	52.3	46.2	37	66	10.9	2.8	33.6							24.09	53.02
01.06.2016 14:09:13	43.2	42	37.8	43.2	43.2	42.5	72	1.2	4.2	37.8							24	54.06
01.06.2016 14:09:19	36.5	36.5	36	36.5	36.5	36.5	78	0	0.5	36							23.9	55.84
01.06.2016 14:09:25	37.7	37.6	36.6	37.7	37.7	37.7	84	0.1	1	36.6							23.9	56.46
01.06.2016 14:09:31	53.8	38.6	36.6	63.7	52.1	38.9	90	15.2	2	36.6							23.81	56.57
01.06.2016 14:09:37	47.8	41.6	39	47.8	47.4	43	96	6.2	2.6	39							23.81	57.3
01.06.2016 14:09:43	41.3	39.3	38.1	41.3	41.2	39.8	102	2	1.2	38.1							23.81	57.92
01.06.2016 14:09:49	55.6	42.8	39.7	60.6	54.7	44.9	108	12.8	3.1	39.7							23.71	58.34
01.06.2016 14:09:55	42.5	41.2	38	42.5	42.5	41.8	114	1.3	3.2	38							23.71	58.86
01.06.2016 14:10:01	49.6	43.4	40.7	49.6	49.2	44.8	120	6.2	2.7	40.7							23.71	59.28
01.06.2016 14:10:07	48.6	39	37.1	53.5	47.7	40	126	9.6	1.9	37.1							23.71	58.66
01.06.2016 14:10:13	45	41.3	39.7	45	45	42.9	132	3.7	1.6	39.7							23.61	57.3
01.06.2016 14:10:19	34.3	34.3	33.9	34.3	34.3	34.3	138	0	0.4	33.9							23.61	56.67
01.06.2016 14:10:25	39	38.9	37.3	39	39	39	144	0.1	1.6	37.3							23.61	54.58
01.06.2016 14:10:31	37.8	37.5	36.6	37.8	37.8	37.7	150	0.3	0.9	36.6							23.61	53.02
01.06.2016 14:10:37	39.9	39.8	38.2	39.9	39.9	39.8	156	0.1	1.6	38.2							23.61	51.03
01.06.2016 14:10:43	34.9	34.8	33.4	34.9	34.9	34.8	162	0.1	1.4	33.4							23.52	51.03
01.06.2016 14:10:49	34.4	34.4	34.1	34.4	34.4	34.4	168	0	0.3	34.1							23.61	52.29
01.06.2016 14:10:55	38.9	34.8	32.7	38.9	38.8	35.9	174	4.1	2.1	32.7							23.52	53.75
01.06.2016 14:11:01	49	37.9	37.2	53.9	48	39.2	180	11.1	0.7	37.2							23.52	55.11
01.06.2016 14:11:07	38	37	36	38	38	37.5	186	1	1	36							23.52	55.94
01.06.2016 14:11:13	47.3	38	37.1	47.3	46.7	40.1	192	9.3	0.9	37.1							23.52	56.67
01.06.2016 14:11:19	39.1	38.3	37.2	39.1	39.1	38.6	198	0.8	1.1	37.2							23.52	57.3
01.06.2016 14:11:25	39.5	37.3	36.2	39.5	39.5	37.9	204	2.2	1.1	36.2							23.52	57.61
01.06.2016 14:11:31	45.2	39.4	37.7	45.2	44.9	40.9	210	5.8	1.7	37.7							23.52	58.24
01.06.2016 14:11:37	44.5	42.1	40.2	44.5	44.5	43.2	216	2.4	1.9	40.2							23.61	58.66
01.06.2016 14:11:43	49	48	46.4	49	49	48.4	222	1	1.6	46.4							23.52	58.86
01.06.2016 14:11:49	43.9	43.9	43.7	43.9	43.9	43.9	228	0	0.2	43.7							23.61	58.66
01.06.2016 14:11:55	41	38.4	37.4	41	41	39.2	234	2.6	1	37.4							23.61	58.76
01.06.2016 14:12:01	50.1	39.2	37.2	50.1	49	41	240	10.9	2	37.2							23.61	58.34
01.06.2016 14:12:07	40.1	37.5	37	40.1	40	38.3	246	2.6	0.5	37							23.61	56.88
01.06.2016 14:12:13	47.7	44	40.7	47.7	47.6	45.3	252	3.7	3.3	40.7							23.61	56.78
01.06.2016 14:12:19	38.8	38.1	36.9	38.8	38.8	38.4	258	0.7	1.2	36.9							23.61	55
01.06.2016 14:12:25	37.1	36.5	34.9	37.1	37.1	36.8	264	0.6	1.6	34.9							23.61	52.08
01.06.2016 14:12:31	40.8	39.7	38.3	40.8	40.8	40.2	270	1.1	1.4	38.3							23.61	50.41
01.06.2016 14:12:37	40.1	38.2	37.4	40.1	40.1	38.7	276	1.9	0.8	37.4							23.61	50.72
01.06.2016 14:12:43	34.6	34.6	34.4	34.6	34.6	34.6	282	0	0.2	34.4							23.61	52.39
01.06.2016 14:12:49	38.6	38.6	37.4	38.6	38.6	38.6	288	0	1.2	37.4							23.61	53.75
01.06.2016 14:12:56	50	39.5	37.5	50.3	48.3	41.5	294	10.5	2	37.5							23.61	55.11
01.06.2016 14:13:01	39.2	37.2	35.5	39.2	39.2	37.7	300	2	1.7	35.5							23.61	55.73
01.06.2016 14:13:07	38.3	38.3	37.7	38.3	38.3	38.3	306	0	0.6	37.7							23.61	56.57
01.06.2016 14:13:13	42.8	35.5	33.3	64.4	48.6	36.6	312	7.3	2.2	33.3							23.61	56.78
01.06.2016 14:13:19	46.4	36.3	35.8	51.4	45.5	37.2	318	10.1	0.5	35.8							23.61	56.99
01.06.2016 14:13:25	35.5	35.3	33.3	35.5	35.5	35.4	324	0.2	2	33.3							23.71	57.4
01.06.2016 14:13:31	31.4	31.3	30.1	31.4	31.4	31.3	330	0.1	1.2	30.1							23.71	57.82
01.06.2016 14:13:37	40.5	30.5	29.9	45.5	39.6	31.4	336	10	0.6	29.9							23.71	57.92
01.06.2016 14:13:43	23.4	23.4	23.4	23.4	23.4	23.4	342	0	0	23.4							23.71	57.51
01.06.2016 14:13:49	27.9	26	25	27.9	27.9	26.5	348	1.9	1	25							23.71	57.19
01.06.2016 14:13:55	26.5	25.1	24.1	48.1	33.1	25.3	354	1.4	1	24.1							23.71	55.94
01.06.2016 14:14:01	23.6	23.5	22.6	23.6	23.6	23.5	360	0.1	0.9	22.6							23.71	55.11
01.06.2016 14:14:07	25.7	24.8	22.3	25.7	25.7	25.2	366	0.9	2.5	22.3							23.71	52.7
01.06.2016 14:14:13	34.4	32.6	29.3	34.4	34.4	33.4	372	1.8	3.3	29.3							23.71	50.09
01.06.2016 14:14:19	39.2	36.4	33.3	39.2	39.2	37.3	378	2.8	3.1	33.3							23.71	49.89
01.06.2016 14:14:25	27.8	27.8	27.4	27.8	27.8	27.8	384	0	0.4	27.4							23.71	50.83
01.06.2016 14:14:31	26.5	26.5	25.8	26.5	26.5	26.5	390	0	0.7	25.8							23.71	52.18
01.06.2016 14:14:37	23.4	23.4	23	23.4	23.4	23.4	396	0	0.4	23							23.71	53.44
01.06.2016 14:14:43	25.8	25.7	25.2	25.8	25.8	25.8	402	0.1	0.5	25.2							23.71	54.79
01.06.2016 14:14:49	21.6	21.6	21.5	21.6	21.6	21.6	408	0	0.1	21.5							23.71	56.05
01.06.2016 14:14:55	15.6	15.6	15.6	15.6	15.6	15.6	414	0	0	15.6							23.71	56.25
01.06.2016 14:15:01	21.8	20.7	18.3	21.8	21.8	21.2	420	1.1	2.4	18.3
01.06.2016 14:15:07	23.4	23.3	22.6	23.4	23.4	23.4	426	0.1	0.7	22.6
01.06.2016 14:15:13	23	22.8	22.1	23	23	22.9	432	0.2	0.7	22.1
01.06.2016 14:15:19	27.3	27.3	27.1	27.3	27.3	27.3	438	0	0.2	27.1
01.06.2016 14:15:25	18.8	18.3	17.4	18.8	18.8	18.5	444	0.5	0.9	17.4
01.06.2016 14:15:31	26	24.1	21.2	26	26	24.9	450	1.9	2.9	21.2
01.06.2016 14:15:37	29.8	29.7	28.7	29.8	29.8	29.8	456	0.1	1	28.7
01.06.2016 14:15:43	18	18	17.5	18	18	18	462	0	0.5	17.5
01.06.2016 14:15:49	19.4	19.4	19.3	19.4	19.4	19.4	468	0	0.1	19.3
01.06.2016 14:15:55	30.2	23.7	22.4	30.2	29.3	24.5	474	6.5	1.3	22.4
01.06.2016 14:16:01	20.7	20.7	20.5	20.7	20.7	20.7	480	0	0.2	20.5
01.06.2016 14:16:07	24.5	24.2	22.9	62.1	32.3	24.4	486	0.3	1.3	22.9
01.06.2016 14:16:13	32.5	26.8	23.2	32.5	32.2	28.3	492	5.7	3.6	23.2
01.06.2016 14:16:19	19.8	19.8	19.2	19.8	19.8	19.8	498	0	0.6	19.2
01.06.2016 14:16:25	23.1	23.1	22.9	23.1	23.1	23.1	504	0	0.2	22.9
01.06.2016 14:16:31	40.6	27.9	24.9	45.6	39.7	30	510	12.7	3	24.9
01.06.2016 14:16:37	24.4	23.2	22.6	24.4	24.3	23.7	516	1.2	0.6	22.6
01.06.2016 14:16:43	26.1	23.3	22.2	26.1	26.1	24.2	522	2.8	1.1	22.2
01.06.2016 14:16:49	22.1	22.1	21.9	22.1	22.1	22.1	528	0	0.2	21.9
01.06.2016 14:16:55	20	19	18.5	57.5	27.7	19.5	534	1	0.5	18.5
01.06.2016 14:17:01	26	24.7	24	26	26	25.3	540	1.3	0.7	24
01.06.2016 14:17:07	25.6	23.7	22	25.6	25.6	24.2	546	1.9	1.7	22
01.06.2016 14:17:13	39.2	30	26.4	39.5	37.5	31.3	552	9.2	3.6	26.4
01.06.2016 14:17:19	23.3	23.3	22.9	23.3	23.3	23.2	558	0	0.4	22.9
01.06.2016 14:17:25	27.6	27.6	27	27.6	27.6	27.6	564	0	0.6	27
01.06.2016 14:17:31	21.2	21.2	21.1	21.2	21.2	21.2	570	0	0.1	21.1
01.06.2016 14:17:37	26.2	26.2	26	26.2	26.2	26.2	576	0	0.2	26
01.06.2016 14:17:43	20	19.9	19.5	20	20	19.9	582	0.1	0.4	19.5
01.06.2016 14:17:49	21.2	21.2	21	21.2	21.2	21.2	588	0	0.2	21
01.06.2016 14:17:55	28.2	21.8	20.4	28.2	27.8	23.3	594	6.4	1.4	20.4
01.06.2016 14:18:01	22.9	22.8	21.3	22.9	22.9	22.9	600	0.1	1.5	21.3
01.06.2016 14:18:07	21.2	21.2	21.2	21.2	21.2	21.2	606	0	0	21.2
01.06.2016 14:18:13	33.9	21.8	21.6	38.9	32.8	23	612	12.1	0.2	21.6
01.06.2016 14:18:19	27.7	22	21	27.7	26.9	22.8	618	5.7	1	21
01.06.2016 14:18:25	23.5	20.4	19.8	23.5	23.4	21.4	624	3.1	0.6	19.8
01.06.2016 14:18:31	19.9	19.9	19.9	19.9	19.9	19.9	630	0	0	19.9
01.06.2016 14:18:37	20	19.8	18.3	20	20	19.9	636	0.2	1.5	18.3
01.06.2016 14:18:43	21	21	21	21	21	21	642	0	0	21
01.06.2016 14:18:49	31.8	19.4	18.7	31.8	30.2	21.1	648	12.4	0.7	18.7
01.06.2016 14:18:55	25.1	23.2	19.9	25.1	25.1	24.1	654	1.9	3.3	19.9
01.06.2016 14:19:01	21.6	21.5	20.8	21.6	21.6	21.5	660	0.1	0.7	20.8
01.06.2016 14:19:07	17.6	17.6	17	17.6	17.6	17.6	666	0	0.6	17
01.06.2016 14:19:13	16.9	16.9	16.2	16.9	16.9	16.9	672	0	0.7	16.2
01.06.2016 14:19:19	18.4	18.4	17.8	18.4	18.4	18.4	678	0	0.6	17.8
01.06.2016 14:19:25	23.1	21.6	19.6	23.1	23.1	22.3	684	1.5	2	19.6
01.06.2016 14:19:31	18.2	18.2	18.1	18.2	18.2	18.2	690	0	0.1	18.1
01.06.2016 14:19:37	20.7	19.8	19.2	20.7	20.7	20.2	696	0.9	0.6	19.2
01.06.2016 14:19:43	16.8	16.7	15.6	16.8	16.8	16.7	702	0.1	1.1	15.6
01.06.2016 14:19:49	14.1	14.1	14	14.1	14.1	14.1	708	0	0.1	14
01.06.2016 14:19:55	17.8	17.1	15.4	17.8	17.8	17.4	714	0.7	1.7	15.4
01.06.2016 14:20:01	20.2	18.4	17.6	20.2	20.2	19.2	720	1.8	0.8	17.6
01.06.2016 14:20:07	18.4	18.2	17.2	18.4	18.4	18.3	726	0.2	1	17.2
01.06.2016 14:20:13	17.9	17.9	17.9	17.9	17.9	17.9	732	0	0	17.9
01.06.2016 14:20:19	17.9	17.9	17.9	17.9	17.9	17.9	738	0	0	17.9
01.06.2016 14:20:25	23.6	21.8	19.2	23.6	23.6	22.6	744	1.8	2.6	19.2
01.06.2016 14:20:31	20.6	20.4	19.7	20.6	20.6	20.5	750	0.2	0.7	19.7
01.06.2016 14:20:37	18	18	18	18	18	18	756	0	0	18
01.06.2016 14:20:43	21.2	20.4	17.6	21.2	21.2	20.8	762	0.8	2.8	17.6
01.06.2016 14:20:49	14.8	14.8	14.6	14.8	14.8	14.8	768	0	0.2	14.6
01.06.2016 14:20:55	14.8	14.8	14.8	14.8	14.8	14.8	774	0	0	14.8
01.06.2016 14:21:01	17.7	17.2	16.6	117.3	22.9	17.4	780	0.5	0.6	16.6
01.06.2016 14:21:07	16.2	16.2	16	16.2	16.2	16.2	786	0	0.2	16
01.06.2016 14:21:13	20.2	18.9	18.4	20.2	20.2	19.5	792	1.3	0.5	18.4
01.06.2016 14:21:19	17.2	17.2	16.8	17.2	17.2	17.2	798	0	0.4	16.8
01.06.2016 14:21:25	15	15	15	15	15	15	804	0	0	15
01.06.2016 14:21:31	19.3	15.8	15.3	19.3	19.2	16.7	810	3.5	0.5	15.3
01.06.2016 14:21:37	13.6	13.6	13.1	13.6	13.6	13.6	816	0	0.5	13.1
01.06.2016 14:21:43	22.5	19.4	18.8	22.5	22.2	19.8	822	3.1	0.6	18.8
01.06.2016 14:21:49	17.4	16.9	16	17.4	17.4	17.1	828	0.5	0.9	16
01.06.2016 14:21:55	19.3	16.9	14.9	19.3	19.2	17.6	834	2.4	2	14.9
01.06.2016 14:22:01	24.3	15.3	14.9	50.9	30.1	15.6	840	9	0.4	14.9
01.06.2016 14:22:07	16.9	16.9	16.7	16.9	16.9	16.9	846	0	0.2	16.7
01.06.2016 14:22:13	16.2	16.2	15.7	16.2	16.2	16.2	852	0	0.5	15.7
01.06.2016 14:22:19	16.1	16.1	16.1	16.1	16.1	16.1	858	0	0	16.1
01.06.2016 14:22:25	13.9	13.8	12.9	13.9	13.9	13.8	864	0.1	0.9	12.9
01.06.2016 14:22:31	15.5	15.5	15.5	15.5	15.5	15.5	870	0	0	15.5
01.06.2016 14:22:37	16.4	16.4	15.9	16.4	16.4	16.4	876	0	0.5	15.9
01.06.2016 14:22:43	14	14	13.9	14	14	14	882	0	0.1	13.9
01.06.2016 14:22:49	13.9	13.9	13.8	13.9	13.9	13.9	888	0	0.1	13.8
01.06.2016 14:22:55	14.5	14.4	13.9	14.5	14.5	14.4	894	0.1	0.5	13.9
01.06.2016 14:23:01	16.2	16.1	15.7	16.2	16.2	16.1	900	0.1	0.4	15.7
01.06.2016 14:23:07	14.8	14.8	14.8	14.8	14.8	14.8	906	0	0	14.8
01.06.2016 14:23:13	17.1	17.1	16.9	17.1	17.1	17.1	912	0	0.2	16.9
01.06.2016 14:23:19	14.8	14.8	14.8	14.8	14.8	14.8	918	0	0	14.8
01.06.2016 14:23:25	27.1	20.1	18.9	27.5	25.5	20.5	924	7	1.2	18.9
01.06.2016 14:23:31	16.4	16.4	16.1	16.4	16.4	16.4	930	0	0.3	16.1
01.06.2016 14:23:37	15.3	15.3	15.3	15.3	15.3	15.3	936	0	0	15.3
01.06.2016 14:23:43	16.9	16.4	15.5	16.9	16.9	16.6	942	0.5	0.9	15.5
01.06.2016 14:23:49	16	16	15.8	16	16	16	948	0	0.2	15.8
01.06.2016 14:23:55	18.7	18.7	18.4	18.7	18.7	18.7	954	0	0.3	18.4
01.06.2016 14:24:01	17.5	17.3	16.6	17.5	17.5	17.4	960	0.2	0.7	16.6
01.06.2016 14:24:07	21.5	20.5	19.1	21.5	21.5	20.9	966	1	1.4	19.1
01.06.2016 14:24:13	22.2	21.3	19	22.2	22.2	21.7	972	0.9	2.3	19
01.06.2016 14:24:19	16.5	16.3	15.4	16.5	16.5	16.4	978	0.2	0.9	15.4
01.06.2016 14:24:25	16.5	16.5	16.3	16.5	16.5	16.5	984	0	0.2	16.3
01.06.2016 14:24:31	16.3	16	14.9	16.3	16.3	16.2	990	0.3	1.1	14.9
01.06.2016 14:24:37	16	16	15.6	16	16	16	996	0	0.4	15.6
01.06.2016 14:24:43	18	17.5	16.2	18	18	17.7	1002	0.5	1.3	16.2
01.06.2016 14:24:49	16	15.6	14.2	16	16	15.7	1008	0.4	1.4	14.2
01.06.2016 14:24:55	14.9	14.7	13.8	14.9	14.9	14.8	1014	0.2	0.9	13.8
01.06.2016 14:25:01	18.1	18.1	18	18.1	18.1	18.1	1020	0	0.1	18
01.06.2016 14:25:07	19.4	19.4	19.2	19.4	19.4	19.4	1026	0	0.2	19.2
01.06.2016 14:25:13	19.2	18.9	18.3	19.2	19.2	19	1032	0.3	0.6	18.3
01.06.2016 14:25:19	22.9	21.6	21	22.9	22.9	22.2	1038	1.3	0.6	21
01.06.2016 14:25:25	19.3	19.3	19.2	19.3	19.3	19.3	1044	0	0.1	19.2
01.06.2016 14:25:31	21.7	19.9	18.9	21.7	21.6	20.3	1050	1.8	1	18.9
01.06.2016 14:25:37	17.8	17.8	17.8	17.8	17.8	17.8	1056	0	0	17.8
01.06.2016 14:25:43	19.4	19.4	19.4	19.4	19.4	19.4	1062	0	0	19.4
01.06.2016 14:25:49	21.4	21.2	20.5	21.4	21.4	21.3	1068	0.2	0.7	20.5
01.06.2016 14:25:55	22.5	20.7	20.1	22.5	22.4	21.1	1074	1.8	0.6	20.1
01.06.2016 14:26:01	22.9	22.9	22.6	22.9	22.9	22.9	1080	0	0.3	22.6
01.06.2016 14:26:07	23	20.6	20.1	23	23	21.3	1086	2.4	0.5	20.1
01.06.2016 14:26:13	21.2	21.2	21.2	21.2	21.2	21.2	1092	0	0	21.2
01.06.2016 14:26:19	22.3	22.2	21.2	22.3	22.3	22.3	1098	0.1	1	21.2
01.06.2016 14:26:25	22.2	22.2	22.1	22.2	22.2	22.2	1104	0	0.1	22.1
01.06.2016 14:26:31	28.7	21.8	21	29	27	22.1	1110	6.9	0.8	21
01.06.2016 14:26:37	18	18	17.8	18	18	18	1116	0	0.2	17.8
01.06.2016 14:26:43	18.5	18.5	18.5	18.5	18.5	18.5	1122	0	0	18.5
01.06.2016 14:26:49	18.4	18.4	17.9	18.4	18.4	18.4	1128	0	0.5	17.9
01.06.2016 14:26:55	16.9	16.9	16.5	16.9	16.9	16.9	1134	0	0.4	16.5
01.06.2016 14:27:01	12.1	12.1	12	12.1	12.1	12.1	1140	0	0.1	12
01.06.2016 14:27:07	11.8	11.8	11.8	11.8	11.8	11.8	1146	0	0	11.8
01.06.2016 14:27:13	17.6	16.4	15.1	17.6	17.6	16.9	1152	1.2	1.3	15.1
01.06.2016 14:27:19	17.1	16.6	15.8	17.1	17.1	16.8	1158	0.5	0.8	15.8
01.06.2016 14:27:25	13.2	13.2	13	13.2	13.2	13.2	1164	0	0.2	13
01.06.2016 14:27:31	13.2	13.1	12.7	13.2	13.2	13.2	1170	0.1	0.4	12.7
01.06.2016 14:27:37	14.4	14.4	13.9	14.4	14.4	14.4	1176	0	0.5	13.9
01.06.2016 14:27:43	21.7	15.4	14.5	21.7	20.8	16.1	1182	6.3	0.9	14.5
01.06.2016 14:27:49	14.1	14.1	14	14.1	14.1	14.1	1188	0	0.1	14
01.06.2016 14:27:55	14.9	14.2	12.3	14.9	14.9	14.5	1194	0.7	1.9	12.3
01.06.2016 14:28:01	14.8	14.8	14.7	14.8	14.8	14.8	1200	0	0.1	14.7
01.06.2016 14:28:07	21.1	15.4	14.9	21.1	20.3	16.2	1206	5.7	0.5	14.9
01.06.2016 14:28:13	16.6	16.6	16.3	16.6	16.6	16.6	1212	0	0.3	16.3
01.06.2016 14:28:19	14.8	14.8	14.8	14.8	14.8	14.8	1218	0	0	14.8
01.06.2016 14:28:25	14.9	14.9	14.6	14.9	14.9	14.9	1224	0	0.3	14.6
01.06.2016 14:28:31	19.4	19.4	18.9	19.4	19.4	19.4	1230	0	0.5	18.9
01.06.2016 14:28:37	19.6	19.6	19.5	19.6	19.6	19.6	1236	0	0.1	19.5
01.06.2016 14:28:43	17.7	17.5	16.8	17.7	17.7	17.6	1242	0.2	0.7	16.8
01.06.2016 14:28:49	21.7	17.5	15.7	21.7	21.4	18.4	1248	4.2	1.8	15.7
01.06.2016 14:28:55	24.4	16.8	16.2	29.4	23.6	17	1254	7.6	0.6	16.2
01.06.2016 14:29:01	18.5	16.5	15.7	18.5	18.4	17	1260	2	0.8	15.7
01.06.2016 14:29:07	24.2	22.6	20.9	45.8	30.8	22.8	1266	1.6	1.7	20.9
01.06.2016 14:29:13	19	14.6	13.8	19	18.9	16.2	1272	4.4	0.8	13.8
01.06.2016 14:29:19	14	14	13.5	14	14	14	1278	0	0.5	13.5
01.06.2016 14:29:25	13.8	13.6	12.9	13.8	13.8	13.7	1284	0.2	0.7	12.9
01.06.2016 14:29:31	15.6	15.6	15.3	15.6	15.6	15.6	1290	0	0.3	15.3
01.06.2016 14:29:37	24.3	16.6	16	29.3	23.5	16.8	1296	7.7	0.6	16
01.06.2016 14:29:43	16.2	16.2	15.3	16.2	16.2	16.2	1302	0	0.9	15.3
01.06.2016 14:29:49	21.7	15	14.4	59.6	27.8	15.3	1308	6.7	0.6	14.4
01.06.2016 14:29:55	17.5	16.4	15.8	17.5	17.4	16.9	1314	1.1	0.6	15.8
01.06.2016 14:30:01	16.7	16.7	16.7	16.7	16.7	16.7	1320	0	0	16.7
01.06.2016 14:30:07	19.6	18.9	17.1	19.6	19.6	19.2	1326	0.7	1.8	17.1
01.06.2016 14:30:13	17.1	16.6	15.6	17.1	17.1	16.8	1332	0.5	1	15.6
01.06.2016 14:30:19	21.3	16.6	15.8	21.3	20.6	17	1338	4.7	0.8	15.8
01.06.2016 14:30:25	21.9	19.7	18.5	43.5	28.5	20.2	1344	2.2	1.2	18.5
01.06.2016 14:30:31	22.6	20.1	15.5	22.6	22.6	21.2	1350	2.5	4.6	15.5
01.06.2016 14:30:37	32.7	21.6	20.1	37.7	31.6	22.3	1356	11.1	1.5	20.1
01.06.2016 14:30:43	30.1	24.2	21.4	30.1	29.8	25.8	1362	5.9	2.8	21.4
01.06.2016 14:30:49	28	23.4	20.3	49.6	34.6	24.6	1368	4.6	3.1	20.3
01.06.2016 14:30:55	18	18	17.9	18	18	18	1374	0	0.1	17.9
01.06.2016 14:31:01	27.1	25.7	22.1	27.1	27.1	26.3	1380	1.4	3.6	22.1
01.06.2016 14:31:07	17.6	17.5	17	17.6	17.6	17.6	1386	0.1	0.5	17
01.06.2016 14:31:13	18.2	18.2	18.2	18.2	18.2	18.2	1392	0	0	18.2
01.06.2016 14:31:19	17.2	17.2	17.1	17.2	17.2	17.2	1398	0	0.1	17.1
01.06.2016 14:31:25	14.9	14.9	14.5	14.9	14.9	14.9	1404	0	0.4	14.5
01.06.2016 14:31:31	28.3	18.4	16.5	28.6	26.5	19.7	1410	9.9	1.9	16.5
01.06.2016 14:31:37	21.6	16.6	15.5	21.6	21.4	18.1	1416	5	1.1	15.5
01.06.2016 14:31:43	17.7	17.7	17.6	17.7	17.7	17.7	1422	0	0.1	17.6
01.06.2016 14:31:49	27.5	20.6	19.4	27.5	27	21.9	1428	6.9	1.2	19.4
01.06.2016 14:31:55	15.8	15.8	15.6	15.8	15.8	15.8	1434	0	0.2	15.6
01.06.2016 14:32:01	22.4	17.1	16.2	22.4	22	18.1	1440	5.3	0.9	16.2
01.06.2016 14:32:07	16.4	16.2	15.3	16.4	16.4	16.3	1446	0.2	0.9	15.3
01.06.2016 14:32:13	17	16.5	15.8	17	17	16.7	1452	0.5	0.7	15.8
01.06.2016 14:32:19	20.4	18.2	16.4	120	25.5	18.8	1458	2.2	1.8	16.4
01.06.2016 14:32:25	19.3	16.1	15.4	118.9	24.4	17.2	1464	3.2	0.7	15.4
01.06.2016 14:32:31	15	15	14.9	15	15	15	1470	0	0.1	14.9
01.06.2016 14:32:37	18	17.7	16.4	18	18	17.8	1476	0.3	1.3	16.4
01.06.2016 14:32:43	19	18.9	18.4	19	19	19	1482	0.1	0.5	18.4
01.06.2016 14:32:49	21.9	20.4	18.3	21.9	21.9	21.1	1488	1.5	2.1	18.3
01.06.2016 14:32:55	18.9	18.9	18.4	18.9	18.9	18.9	1494	0	0.5	18.4
01.06.2016 14:33:01	15.4	15.4	15.4	15.4	15.4	15.4	1500	0	0	15.4
01.06.2016 14:33:07	19.1	19.1	18.6	19.1	19.1	19.1	1506	0	0.5	18.6
01.06.2016 14:33:13	19.7	19.7	19.2	19.7	19.7	19.7	1512	0	0.5	19.2
01.06.2016 14:33:19	21.8	18.9	17.6	21.8	21.8	19.8	1518	2.9	1.3	17.6
01.06.2016 14:33:25	19.4	19.4	19.3	19.4	19.4	19.4	1524	0	0.1	19.3
01.06.2016 14:33:31	43.7	22	19.7	102	46.5	24.1	1530	21.7	2.3	19.7
01.06.2016 14:33:37	35.2	20.6	18.9	40.5	32.7	21.2	1536	14.6	1.7	18.9
01.06.2016 14:33:43	24.7	19	17.9	24.7	23.9	19.8	1542	5.7	1.1	17.9
01.06.2016 14:33:49	29.1	19.7	18.2	29.1	27.5	20.4	1548	9.4	1.5	18.2
01.06.2016 14:33:55	20.9	19.2	16.5	20.9	20.9	20	1554	1.7	2.7	16.5
01.06.2016 14:34:01	21.5	18.7	15.8	43.1	28.1	19.5	1560	2.8	2.9	15.8
01.06.2016 14:34:07	20.9	18.8	16.9	42.5	27.5	19.3	1566	2.1	1.9	16.9
01.06.2016 14:34:13	25.8	15.9	15.7	26.1	24	17.2	1572	9.9	0.2	15.7
01.06.2016 14:34:19	13.1	13.1	13.1	13.1	13.1	13.1	1578	0	0	13.1
01.06.2016 14:34:25	11.9	11.9	11.9	11.9	11.9	11.9	1584	0	0	11.9
01.06.2016 14:34:31	18	16	14.2	18	17.9	16.5	1590	2	1.8	14.2
01.06.2016 14:34:37	15.4	14	13.5	37	22	14.2	1596	1.4	0.5	13.5
01.06.2016 14:34:43	13.7	13.7	13.4	13.7	13.7	13.7	1602	0	0.3	13.4
01.06.2016 14:34:49	17.4	13.9	13.3	17.4	17	14.4	1608	3.5	0.6	13.3
01.06.2016 14:34:55	12.9	12.9	12.9	12.9	12.9	12.9	1614	0	0	12.9
01.06.2016 14:35:01	17.1	16.1	15.5	17.1	17.1	16.5	1620	1	0.6	15.5
01.06.2016 14:35:07	16.2	16.2	16.1	16.2	16.2	16.2	1626	0	0.1	16.1
01.06.2016 14:35:13	17	15.1	14.4	17	16.9	15.6	1632	1.9	0.7	14.4
01.06.2016 14:35:19	13.3	13.2	12.6	13.3	13.3	13.2	1638	0.1	0.6	12.6
01.06.2016 14:35:25	13.2	13.1	12.6	13.2	13.2	13.1	1644	0.1	0.5	12.6
01.06.2016 14:35:31	14.8	13	11.9	14.8	14.7	13.4	1650	1.8	1.1	11.9
01.06.2016 14:35:37	16.9	16.2	14.4	16.9	16.9	16.6	1656	0.7	1.8	14.4
01.06.2016 14:35:43	14.6	14.6	14.6	14.6	14.6	14.6	1662	0	0	14.6
01.06.2016 14:35:49	13.7	13.7	13.7	13.7	13.7	13.7	1668	0	0	13.7
01.06.2016 14:35:55	12.4	12.4	12	12.4	12.4	12.4	1674	0	0.4	12
01.06.2016 14:36:01	14.3	14.3	13.9	14.3	14.3	14.3	1680	0	0.4	13.9
01.06.2016 14:36:07	13.8	13.8	13.7	13.8	13.8	13.8	1686	0	0.1	13.7
01.06.2016 14:36:13	14.3	14	12.9	14.3	14.3	14.1	1692	0.3	1.1	12.9
01.06.2016 14:36:19	13.2	13.2	12.8	13.2	13.2	13.2	1698	0	0.4	12.8
01.06.2016 14:36:25	14.8	14.8	14.7	14.8	14.8	14.8	1704	0	0.1	14.7
01.06.2016 14:36:31	12.5	12.5	12.5	12.5	12.5	12.5	1710	0	0	12.5
01.06.2016 14:36:37	11	11	11	11	11	11	1716	0	0	11
01.06.2016 14:36:43	13.6	12.9	11.8	13.6	13.6	13.2	1722	0.7	1.1	11.8
01.06.2016 14:36:49	13.2	13.2	13.1	13.2	13.2	13.2	1728	0	0.1	13.1
01.06.2016 14:36:55	12.4	12.4	12.3	12.4	12.4	12.4	1734	0	0.1	12.3
01.06.2016 14:37:01	15.3	13.9	12.4	36.9	21.9	14	1740	1.4	1.5	12.4
01.06.2016 14:37:07	13.6	13.6	13.6	13.6	13.6	13.6	1746	0	0	13.6
01.06.2016 14:37:13	13.1	13.1	13	13.1	13.1	13.1	1752	0	0.1	13
01.06.2016 14:37:19	14.8	14.8	14.7	14.8	14.8	14.8	1758	0	0.1	14.7
01.06.2016 14:37:25	13.3	13.3	12.7	13.3	13.3	13.3	1764	0	0.6	12.7
01.06.2016 14:37:31	17.5	13.2	12.3	39.1	23.8	13.6	1770	4.3	0.9	12.3
01.06.2016 14:37:37	12	12	12	12	12	12	1776	0	0	12
01.06.2016 14:37:43	12.5	12.5	12.4	12.5	12.5	12.5	1782	0	0.1	12.4
01.06.2016 14:37:49	13.3	13.3	13.2	13.3	13.3	13.3	1788	0	0.1	13.2
01.06.2016 14:37:55	13.8	13.8	13.2	13.8	13.8	13.8	1794	0	0.6	13.2
01.06.2016 14:38:01	24.3	14.6	13.6	29.2	23.4	15.7	1800	9.7	1	13.6
01.06.2016 14:38:07	17.7	15.1	13.2	17.7	17.7	16	1806	2.6	1.9	13.2
01.06.2016 14:38:13	15.4	14.9	13.1	15.4	15.4	15.1	1812	0.5	1.8	13.1
01.06.2016 14:38:19	14.9	14.9	14.8	14.9	14.9	14.9	1818	0	0.1	14.8
01.06.2016 14:38:25	15.9	15.4	14.7	15.9	15.9	15.6	1824	0.5	0.7	14.7
01.06.2016 14:38:31	23.1	15.4	14.3	23.5	21.5	16.1	1830	7.7	1.1	14.3
01.06.2016 14:38:37	14.7	14.7	14.2	14.7	14.7	14.7	1836	0	0.5	14.2
01.06.2016 14:38:43	14.8	14.8	14.7	14.8	14.8	14.8	1842	0	0.1	14.7
01.06.2016 14:38:49	19	15.8	15.1	19	18.7	16.2	1848	3.2	0.7	15.1
01.06.2016 14:38:55	14	13.7	13	14	14	13.9	1854	0.3	0.7	13
01.06.2016 14:39:01	12.6	12.6	12.2	12.6	12.6	12.6	1860	0	0.4	12.2
01.06.2016 14:39:07	20.5	13.2	12.5	20.9	18.9	13.8	1866	7.3	0.7	12.5
01.06.2016 14:39:13	13.5	13.5	13.4	13.5	13.5	13.5	1872	0	0.1	13.4
01.06.2016 14:39:19	20.6	18	14.8	20.6	20.6	19.1	1878	2.6	3.2	14.8
01.06.2016 14:39:25	21.3	15.6	13.8	21.3	20.9	16.8	1884	5.7	1.8	13.8
01.06.2016 14:39:31	16	16	16	16	16	16	1890	0	0	16
01.06.2016 14:39:37	26.6	18.7	17.3	31.6	25.8	19	1896	7.9	1.4	17.3
01.06.2016 14:39:43	18.9	18.6	17.5	18.9	18.9	18.8	1902	0.3	1.1	17.5
01.06.2016 14:39:49	20	19.1	17	20	20	19.5	1908	0.9	2.1	17
01.06.2016 14:39:55	26.4	18.7	15.3	26.7	24.7	19.4	1914	7.7	3.4	15.3
01.06.2016 14:40:01	15.6	15.6	15.6	15.6	15.6	15.6	1920	0	0	15.6
01.06.2016 14:40:07	15.2	15.2	15.2	15.2	15.2	15.2	1926	0	0	15.2
01.06.2016 14:40:13	24.4	15.1	14.1	24.8	22.7	16.1	1932	9.3	1	14.1
01.06.2016 14:40:19	16.4	14.3	13.1	16.4	16.3	14.8	1938	2.1	1.2	13.1
01.06.2016 14:40:25	12	12	11.9	12	12	12	1944	0	0.1	11.9
01.06.2016 14:40:31	12.4	12.4	12.4	12.4	12.4	12.4	1950	0	0	12.4
01.06.2016 14:40:37	14.8	13.5	12.2	14.8	14.8	14	1956	1.3	1.3	12.2
01.06.2016 14:40:43	23.3	16.9	14.3	23.3	22.5	18	1962	6.4	2.6	14.3
01.06.2016 14:40:49	24.3	15	14.6	123.9	27.8	15.7	1968	9.3	0.4	14.6
01.06.2016 14:40:55	14.5	14.5	13.8	14.5	14.5	14.5	1974	0	0.7	13.8
01.06.2016 14:41:01	15.2	15.2	14.6	15.2	15.2	15.2	1980	0	0.6	14.6
01.06.2016 14:41:07	13.3	13	12.3	13.3	13.3	13.2	1986	0.3	0.7	12.3
01.06.2016 14:41:13	12.3	12.1	11.4	12.3	12.3	12.2	1992	0.2	0.7	11.4
01.06.2016 14:41:19	12.9	12.7	12	50.4	20.6	12.8	1998	0.2	0.7	12
01.06.2016 14:41:25	12.9	12.8	12.3	12.9	12.9	12.8	2004	0.1	0.5	12.3
01.06.2016 14:41:31	12.4	12.4	12.3	12.4	12.4	12.4	2010	0	0.1	12.3
01.06.2016 14:41:37	12.4	12.4	12.2	12.4	12.4	12.4	2016	0	0.2	12.2
01.06.2016 14:41:43	13.9	13.9	13.4	13.9	13.9	13.9	2022	0	0.5	13.4
01.06.2016 14:41:49	13.2	13.2	13.2	13.2	13.2	13.2	2028	0	0	13.2
01.06.2016 14:41:55	12.1	12.1	12.1	12.1	12.1	12.1	2034	0	0	12.1
01.06.2016 14:42:01	15.4	15.3	14.7	15.4	15.4	15.4	2040	0.1	0.6	14.7
01.06.2016 14:42:07	16.1	16.1	16	16.1	16.1	16.1	2046	0	0.1	16
01.06.2016 14:42:13	13.9	13.9	13.8	13.9	13.9	13.9	2052	0	0.1	13.8
01.06.2016 14:42:19	11.7	11.7	11.2	11.7	11.7	11.7	2058	0	0.5	11.2
01.06.2016 14:42:25	13	13	12.9	13	13	13	2064	0	0.1	12.9
01.06.2016 14:42:31	20.4	13.7	13.1	20.8	18.8	13.9	2070	6.7	0.6	13.1
01.06.2016 14:42:37	15.2	15	13.7	15.2	15.2	15.1	2076	0.2	1.3	13.7
01.06.2016 14:42:43	12.6	12.6	12.1	12.6	12.6	12.6	2082	0	0.5	12.1
01.06.2016 14:42:49	12.3	12.3	11.8	12.3	12.3	12.3	2088	0	0.5	11.8
01.06.2016 14:42:55	14.1	14.1	14.1	14.1	14.1	14.1	2094	0	0	14.1
01.06.2016 14:43:01	19.7	17.4	15.5	19.7	19.6	18.1	2100	2.3	1.9	15.5
01.06.2016 14:43:07	15.4	15.4	15.4	15.4	15.4	15.4	2106	0	0	15.4
01.06.2016 14:43:13	16.1	15.3	13.7	16.1	16.1	15.6	2112	0.8	1.6	13.7
01.06.2016 14:43:19	13.8	13.7	13.3	13.8	13.8	13.7	2118	0.1	0.4	13.3
01.06.2016 14:43:25	14	14	14	14	14	14	2124	0	0	14
01.06.2016 14:43:31	18.4	17.2	14.5	18.4	18.4	17.8	2130	1.2	2.7	14.5
01.06.2016 14:43:37	15.6	15.2	13.7	15.6	15.6	15.4	2136	0.4	1.5	13.7
01.06.2016 14:43:43	13.3	13.3	13.3	13.3	13.3	13.3	2142	0	0	13.3
01.06.2016 14:43:49	12.4	12.4	12.4	12.4	12.4	12.4	2148	0	0	12.4
01.06.2016 14:43:55	17.8	15.8	15.2	17.8	17.7	16.3	2154	2	0.6	15.2
01.06.2016 14:44:01	16.7	16.7	16.6	16.7	16.7	16.7	2160	0	0.1	16.6
01.06.2016 14:44:07	19.7	18.9	17.7	19.7	19.7	19.3	2166	0.8	1.2	17.7
01.06.2016 14:44:13	16.4	15.8	13.9	16.4	16.4	16	2172	0.6	1.9	13.9
01.06.2016 14:44:19	18.7	15.3	15	18.7	18.6	16.4	2178	3.4	0.3	15
01.06.2016 14:44:25	16.2	15.9	15.2	16.2	16.2	16.1	2184	0.3	0.7	15.2
01.06.2016 14:44:31	11.5	11.5	11.4	11.5	11.5	11.5	2190	0	0.1	11.4
01.06.2016 14:44:37	10.6	10.6	10.6	10.6	10.6	10.6	2196	0	0	10.6
01.06.2016 14:44:43	13.1	13.1	13.1	13.1	13.1	13.1	2202	0	0	13.1
01.06.2016 14:44:49	12.6	12.6	12.5	12.6	12.6	12.6	2208	0	0.1	12.5
01.06.2016 14:44:55	12.3	12.2	11.8	12.3	12.3	12.2	2214	0.1	0.4	11.8
01.06.2016 14:45:01	13.3	13.3	13.3	13.3	13.3	13.3	2220	0	0	13.3
01.06.2016 14:45:07	11.2	11.2	11.2	11.2	11.2	11.2	2226	0	0	11.2
01.06.2016 14:45:13	11.4	11.4	11.2	11.4	11.4	11.4	2232	0	0.2	11.2
01.06.2016 14:45:19	12.6	12.6	12.6	12.6	12.6	12.6	2238	0	0	12.6
01.06.2016 14:45:25	14	13	12.4	14	13.9	13.4	2244	1	0.6	12.4
01.06.2016 14:45:31	10.9	10.9	10.9	10.9	10.9	10.9	2250	0	0	10.9
01.06.2016 14:45:37	12.6	12.6	12.5	12.6	12.6	12.6	2256	0	0.1	12.5
01.06.2016 14:45:43	12.9	12.9	12.9	12.9	12.9	12.9	2262	0	0	12.9
01.06.2016 14:45:49	14	14	14	14	14	14	2268	0	0	14
01.06.2016 14:45:55	11.1	11.1	11	11.1	11.1	11.1	2274	0	0.1	11
01.06.2016 14:46:01	15.2	14.9	14.1	15.2	15.2	15	2280	0.3	0.8	14.1
01.06.2016 14:46:07	16.1	15.8	14.3	16.1	16.1	15.9	2286	0.3	1.5	14.3
01.06.2016 14:46:13	21.7	15	14.2	22.1	20.1	15.2	2292	6.7	0.8	14.2
01.06.2016 14:46:19	13.5	13	11.4	13.5	13.5	13.2	2298	0.5	1.6	11.4
01.06.2016 14:46:25	12.7	12.4	11.7	12.7	12.7	12.5	2304	0.3	0.7	11.7
01.06.2016 14:46:31	13.3	13.3	13.3	13.3	13.3	13.3	2310	0	0	13.3
01.06.2016 14:46:37	17.6	16.3	14.1	17.6	17.6	16.9	2316	1.3	2.2	14.1
01.06.2016 14:46:43	15.7	14.1	13.5	37.3	22.3	14.3	2322	1.6	0.6	13.5
01.06.2016 14:46:49	17.7	14.8	12.9	117.3	22.8	15.7	2328	2.9	1.9	12.9
01.06.2016 14:46:55	15	13.3	11.9	36.6	21.6	13.6	2334	1.7	1.4	11.9
01.06.2016 14:47:01	13	12.9	12.5	13	13	13	2340	0.1	0.4	12.5
01.06.2016 14:47:07	12.5	12.5	12.4	12.5	12.5	12.5	2346	0	0.1	12.4
01.06.2016 14:47:13	12.6	12.6	12.6	12.6	12.6	12.6	2352	0	0	12.6
01.06.2016 14:47:19	15.5	13.9	12.6	15.5	15.5	14.6	2358	1.6	1.3	12.6
01.06.2016 14:47:25	16	13.9	13.3	16	16	14.5	2364	2.1	0.6	13.3
01.06.2016 14:47:31	14.7	14.3	12.9	14.7	14.7	14.5	2370	0.4	1.4	12.9
01.06.2016 14:47:37	14.3	14.3	14.3	14.3	14.3	14.3	2376	0	0	14.3
01.06.2016 14:47:43	16.9	16.5	15.1	16.9	16.9	16.7	2382	0.4	1.4	15.1
01.06.2016 14:47:49	19.7	19.1	16.3	19.7	19.7	19.3	2388	0.6	2.8	16.3
01.06.2016 14:47:55	36.5	15.3	14.7	46.5	34	16.2	2394	21.2	0.6	14.7
01.06.2016 14:48:01	11.5	11.5	11.5	11.5	11.5	11.5	2400	0	0	11.5
01.06.2016 14:48:07	12.7	12.4	11.7	12.7	12.7	12.5	2406	0.3	0.7	11.7
01.06.2016 14:48:13	14.3	13.8	12	14.3	14.3	14	2412	0.5	1.8	12
01.06.2016 14:48:19	12.1	12.1	12	12.1	12.1	12.1	2418	0	0.1	12
01.06.2016 14:48:25	12.8	12.8	12.7	12.8	12.8	12.8	2424	0	0.1	12.7
01.06.2016 14:48:31	15.4	13.3	12.7	15.4	15.3	13.8	2430	2.1	0.6	12.7
01.06.2016 14:48:37	12.9	12.9	12.7	12.9	12.9	12.8	2436	0	0.2	12.7
01.06.2016 14:48:43	13.9	13.9	13.8	13.9	13.9	13.9	2442	0	0.1	13.8
01.06.2016 14:48:49	13.2	13.2	13.2	13.2	13.2	13.2	2448	0	0	13.2
01.06.2016 14:48:55	11.6	11.5	11.1	11.6	11.6	11.5	2454	0.1	0.4	11.1
01.06.2016 14:49:01	11.8	11.8	11.8	11.8	11.8	11.8	2460	0	0	11.8
01.06.2016 14:49:07	17.8	14.5	13.4	17.8	17.5	15	2466	3.3	1.1	13.4
01.06.2016 14:49:13	16.2	15.4	13.5	16.2	16.2	15.7	2472	0.8	1.9	13.5
01.06.2016 14:49:19	13.9	13.9	13.6	13.9	13.9	13.9	2478	0	0.3	13.6
01.06.2016 14:49:25	14.3	14.3	14.3	14.3	14.3	14.3	2484	0	0	14.3
01.06.2016 14:49:31	13.9	13.9	13.7	13.9	13.9	13.9	2490	0	0.2	13.7
01.06.2016 14:49:37	13.1	13.1	13	13.1	13.1	13.1	2496	0	0.1	13
01.06.2016 14:49:43	15.1	15.1	15.1	15.1	15.1	15.1	2502	0	0	15.1
01.06.2016 14:49:49	17.8	16.6	15.2	17.8	17.8	17.1	2508	1.2	1.4	15.2
01.06.2016 14:49:55	13.4	13.4	13.3	13.4	13.4	13.4	2514	0	0.1	13.3
01.06.2016 14:50:01	14	14	14	14	14	14	2520	0	0	14
01.06.2016 14:50:07	13.4	13.4	13.2	13.4	13.4	13.3	2526	0	0.2	13.2
01.06.2016 14:50:13	15	15	14.6	15	15	15	2532	0	0.4	14.6
01.06.2016 14:50:19	12.5	12.5	12.4	12.5	12.5	12.5	2538	0	0.1	12.4
01.06.2016 14:50:25	13.1	13.1	13.1	13.1	13.1	13.1	2544	0	0	13.1
01.06.2016 14:50:31	12.9	12.8	12.3	12.9	12.9	12.8	2550	0.1	0.5	12.3
01.06.2016 14:50:37	13.8	13.8	13.8	13.8	13.8	13.8	2556	0	0	13.8
01.06.2016 14:50:43	15.9	15.9	15.8	15.9	15.9	15.9	2562	0	0.1	15.8
01.06.2016 14:50:49	14	14	13.6	14	14	14	2568	0	0.4	13.6
01.06.2016 14:50:55	13.5	13.5	13.4	13.5	13.5	13.5	2574	0	0.1	13.4
01.06.2016 14:51:01	16.6	16.4	15.1	16.6	16.6	16.5	2580	0.2	1.3	15.1
01.06.2016 14:51:07	13.2	12.9	12	13.2	13.2	13	2586	0.3	0.9	12
01.06.2016 14:51:13	13.7	13.5	12.8	13.7	13.7	13.6	2592	0.2	0.7	12.8
01.06.2016 14:51:19	12.7	12.7	12.7	12.7	12.7	12.7	2598	0	0	12.7
01.06.2016 14:51:25	14.2	14.1	13.7	14.2	14.2	14.2	2604	0.1	0.4	13.7
01.06.2016 14:51:31	14.7	14.7	14.6	14.7	14.7	14.7	2610	0	0.1	14.6
01.06.2016 14:51:37	13.7	13.2	11.7	13.7	13.7	13.4	2616	0.5	1.5	11.7
01.06.2016 14:51:43	14.7	14.7	14.7	14.7	14.7	14.7	2622	0	0	14.7
01.06.2016 14:51:49	17.5	14.9	14.2	154.6	30.3	15.7	2628	2.6	0.7	14.2
01.06.2016 14:51:55	18.7	14.5	14	18.7	18.4	15.4	2634	4.2	0.5	14
01.06.2016 14:52:01	17.1	13.4	12.7	17.1	16.8	14.1	2640	3.7	0.7	12.7
01.06.2016 14:52:07	20.5	18.9	16.2	20.5	20.5	19.6	2646	1.6	2.7	16.2
01.06.2016 14:52:13	14.4	14.2	13.5	14.4	14.4	14.3	2652	0.2	0.7	13.5
01.06.2016 14:52:19	13.8	13.8	13.8	13.8	13.8	13.8	2658	0	0	13.8
01.06.2016 14:52:25	12.3	12.3	12.3	12.3	12.3	12.3	2664	0	0	12.3
01.06.2016 14:52:31	13.3	13.1	12.3	13.3	13.3	13.2	2670	0.2	0.8	12.3
01.06.2016 14:52:37	13.3	13.3	13.1	13.3	13.3	13.3	2676	0	0.2	13.1
01.06.2016 14:52:43	14.4	14.3	13.8	14.4	14.4	14.3	2682	0.1	0.5	13.8
01.06.2016 14:52:49	11.7	11.7	11.6	11.7	11.7	11.7	2688	0	0.1	11.6
01.06.2016 14:52:55	12.3	12.3	11.3	12.3	12.3	12.3	2694	0	1	11.3
01.06.2016 14:53:01	13.2	12.9	11.7	13.2	13.2	13.1	2700	0.3	1.2	11.7
01.06.2016 14:53:07	14.5	13.8	12.4	14.5	14.5	14.1	2706	0.7	1.4	12.4
01.06.2016 14:53:13	15	14.7	13.5	15	15	14.8	2712	0.3	1.2	13.5
01.06.2016 14:53:19	11.9	11.9	11.9	11.9	11.9	11.9	2718	0	0	11.9
01.06.2016 14:53:25	11.4	11.4	11.3	11.4	11.4	11.4	2724	0	0.1	11.3
01.06.2016 14:53:31	12.7	12.4	11.7	112.3	17.8	12.5	2730	0.3	0.7	11.7	0
01.06.2016 14:53:37	11.2	11.2	11.1	11.2	11.2	11.2	2736	0	0.1	11.1	6
01.06.2016 14:53:43	14.4	12.5	12	14.4	14.3	13	2742	1.9	0.5	12	12
01.06.2016 14:53:49	13.5	13.4	12.7	13.5	13.5	13.4	2748	0.1	0.7	12.7	18
01.06.2016 14:53:55	11.8	11.7	10.8	11.8	11.8	11.7	2754	0.1	0.9	10.8	24
01.06.2016 14:54:01	11.1	11.1	11.1	11.1	11.1	11.1	2760	0	0	11.1	30
01.06.2016 14:54:07	11.7	11.7	11.4	11.7	11.7	11.6	2766	0	0.3	11.4	36
01.06.2016 14:54:13	11.8	11.8	11.8	11.8	11.8	11.8	2772	0	0	11.8	42
01.06.2016 14:54:19	10.3	10.3	10.2	10.3	10.3	10.3	2778	0	0.1	10.2	48
01.06.2016 14:54:25	10.2	10.2	10.2	10.2	10.2	10.2	2784	0	0	10.2	54
01.06.2016 14:54:31	11.5	11.5	11.4	11.5	11.5	11.5	2790	0	0.1	11.4	60
01.06.2016 14:54:37	11.9	11.7	10.8	11.9	11.9	11.8	2796	0.2	0.9	10.8	66
01.06.2016 14:54:43	12.5	12.5	12.5	12.5	12.5	12.5	2802	0	0	12.5	72
01.06.2016 14:54:49	12	12	11.6	12	12	12	2808	0	0.4	11.6	78
01.06.2016 14:54:55	14.3	13.8	12.2	14.3	14.3	14	2814	0.5	1.6	12.2	84
01.06.2016 14:55:01	12.5	12.5	12.5	12.5	12.5	12.5	2820	0	0	12.5	90
01.06.2016 14:55:07	13.7	13.7	13.5	13.7	13.7	13.7	2826	0	0.2	13.5	96
01.06.2016 14:55:13	11.6	11.6	11.6	11.6	11.6	11.6	2832	0	0	11.6	102
01.06.2016 14:55:19	20	13.5	12.3	20	19.1	14.3	2838	6.5	1.2	12.3	108
01.06.2016 14:55:25	12.4	11.5	10.8	49.9	20.1	11.9	2844	0.9	0.7	10.8	114
01.06.2016 14:55:31	10.9	10.9	10.8	10.9	10.9	10.9	2850	0	0.1	10.8	120
01.06.2016 14:55:37	12.3	12.3	11.8	12.3	12.3	12.3	2856	0	0.5	11.8	126
01.06.2016 14:55:43	11.3	11.3	11.3	11.3	11.3	11.3	2862	0	0	11.3	132
01.06.2016 14:55:49	11.7	11.7	11.5	11.7	11.7	11.7	2868	0	0.2	11.5	138
01.06.2016 14:55:55	12.1	11.8	11.2	12.1	12.1	11.9	2874	0.3	0.6	11.2	144
01.06.2016 14:56:01	11.9	11.9	11.1	11.9	11.9	11.9	2880	0	0.8	11.1	150
01.06.2016 14:56:07	14.8	14.4	13.2	72.4	21.7	14.6	2886	0.4	1.2	13.2	156
01.06.2016 14:56:13	17.6	15.3	13.2	17.6	17.5	15.9	2892	2.3	2.1	13.2	162
01.06.2016 14:56:19	13.6	13.6	13.4	13.6	13.6	13.6	2898	0	0.2	13.4	168
01.06.2016 14:56:25	13.8	13.8	13.7	13.8	13.8	13.8	2904	0	0.1	13.7	174
01.06.2016 14:56:31	13.2	13.2	13.2	13.2	13.2	13.2	2910	0	0	13.2	180
01.06.2016 14:56:37	13.5	13.5	13.5	13.5	13.5	13.5	2916	0	0	13.5	186
01.06.2016 14:56:43	13.9	13.4	12.3	13.9	13.9	13.7	2922	0.5	1.1	12.3	192
01.06.2016 14:56:49	11.7	11.7	11.3	11.7	11.7	11.7	2928	0	0.4	11.3	198
01.06.2016 14:56:55	12.8	12.5	11.8	12.8	12.8	12.6	2934	0.3	0.7	11.8	204
01.06.2016 14:57:01	13.8	13.4	12.7	13.8	13.8	13.6	2940	0.4	0.7	12.7	210
01.06.2016 14:57:07	13.9	13.4	12	13.9	13.9	13.6	2946	0.5	1.4	12	216
01.06.2016 14:57:13	11.5	11.5	11.5	11.5	11.5	11.5	2952	0	0	11.5	222
01.06.2016 14:57:19	12.4	12.4	12.4	12.4	12.4	12.4	2958	0	0	12.4	228
01.06.2016 14:57:25	13.4	13.4	13.4	13.4	13.4	13.4	2964	0	0	13.4	234
01.06.2016 14:57:31	17.7	15.5	13.6	17.7	17.6	16.5	2970	2.2	1.9	13.6	240
01.06.2016 14:57:37	12	12	11.7	12	12	12	2976	0	0.3	11.7	246
01.06.2016 14:57:43	10.7	10.7	10.7	10.7	10.7	10.7	2982	0	0	10.7	252
01.06.2016 14:57:49	11.3	11.3	11.3	11.3	11.3	11.3	2988	0	0	11.3	258
01.06.2016 14:57:55	11.9	11.9	11.8	11.9	11.9	11.9	2994	0	0.1	11.8	264
01.06.2016 14:58:01	12.1	12.1	11.9	12.1	12.1	12.1	3000	0	0.2	11.9	270
01.06.2016 14:58:07	12.8	12.6	11.9	12.8	12.8	12.7	3006	0.2	0.7	11.9	276
01.06.2016 14:58:12	12.1	12.1	12.1	12.1	12.1	12.1	3012	0	0	12.1	282
01.06.2016 14:58:19	12.3	12.3	12.3	12.3	12.3	12.3	3018	0	0	12.3	288
01.06.2016 14:58:25	12.5	12.5	12.4	12.5	12.5	12.5	3024	0	0.1	12.4	294
01.06.2016 14:58:31	13.4	13.4	12.9	13.4	13.4	13.4	3030	0	0.5	12.9	300
01.06.2016 14:58:37	14.4	14.4	14.1	14.4	14.4	14.4	3036	0	0.3	14.1	306
01.06.2016 14:58:43	13.3	12.3	11.6	13.3	13.3	12.8	3042	1	0.7	11.6	312
01.06.2016 14:58:49	11.3	11.3	11.2	11.3	11.3	11.3	3048	0	0.1	11.2	318
01.06.2016 14:58:55	12.6	11.5	10.7	12.6	12.6	12	3054	1.1	0.8	10.7	324
01.06.2016 14:59:01	14.2	14.2	13.5	14.2	14.2	14.2	3060	0	0.7	13.5	330
01.06.2016 14:59:07	10.1	10.1	10.1	10.1	10.1	10.1	3066	0	0	10.1	336
01.06.2016 14:59:13	14.1	13.4	11.1	14.1	14.1	13.7	3072	0.7	2.3	11.1	342
01.06.2016 14:59:19	76.9	35.4	16.5	156.4	87.2	45.6	3078	41.5	18.9	16.5	348
01.06.2016 14:59:25	127.7	36.2	16.5	241	153.6	56.3	3084	91.5	19.7	16.5	354
01.06.2016 14:59:31	67.3	20.7	13	72.3	63.7	30.7	3090	46.6	7.7	13	360
01.06.2016 14:59:37	109	32.3	15.4	178.8	115.1	44.6	3096	76.7	16.9	15.4	366
01.06.2016 14:59:43	52.9	12.3	12.2	79.8	52.8	14.3	3102	40.6	0.1	12.2	372
01.06.2016 14:59:49	125.5	38.8	15.9	396.6	118.4	52.9	3108	86.7	22.9	15.9	378
01.06.2016 14:59:55	116.7	22.3	15.1	1009.7	177.6	36.2	3114	94.4	7.2	15.1	384
01.06.2016 15:00:01	145.7	17.9	12.4	730.9	163.6	29.5	3120	127.8	5.5	12.4	390
01.06.2016 15:00:07	71.2	26.2	13	129.2	73.5	35.2	3126	45	13.2	13	396
01.06.2016 15:00:13	52.8	24.3	13.5	352.2	76.3	31.4	3132	28.5	10.8	13.5	402
01.06.2016 15:00:19	153.7	16	12.8	780.8	198.4	27.5	3138	137.7	3.2	12.8	408
01.06.2016 15:00:25	54.2	18.4	12.7	618.8	92.3	25.7	3144	35.8	5.7	12.7	414
01.06.2016 15:00:31	76.7	23.7	13.8	92	71.2	30.8	3150	53	9.9	13.8	420
01.06.2016 15:00:37	142.6	49	17.7	540.2	155.1	63.1	3156	93.6	31.3	17.7	426
01.06.2016 15:00:43	434.1	79.5	22.7	1585.8	479.1	137.4	3162	354.6	56.8	22.7	432
01.06.2016 15:00:49	397.3	49.5	18.9	1777.3	529.6	96.1	3168	347.8	30.6	18.9	438
01.06.2016 15:00:55	254.8	56.9	19.9	1031.2	325.3	89.8	3174	197.9	37	19.9	444
01.06.2016 15:01:01	271.8	59.9	19.3	971.8	325.6	96.9	3180	211.9	40.6	19.3	450
01.06.2016 15:01:07	378.7	51.1	18.3	999.3	405	94.8	3186	327.6	32.8	18.3	456
01.06.2016 15:01:13	321.6	55.8	19.8	1991.7	404.2	88.4	3192	265.8	36	19.8	462
01.06.2016 15:01:19	398	73.1	23	1119.3	442.4	122.3	3198	324.9	50.1	23	468
01.06.2016 15:01:25	385.1	67.4	22.3	1494.8	471.2	110.1	3204	317.7	45.1	22.3	474
01.06.2016 15:01:31	214.2	63.1	21	730	288.1	87.4	3210	151.1	42.1	21	480
01.06.2016 15:01:37	296.6	32.6	16.6	1503.4	404.1	66.2	3216	264	16	16.6	486
01.06.2016 15:01:43	190.9	35.4	14.4	554.8	212.6	58.7	3222	155.5	21	14.4	492
01.06.2016 15:01:49	290.6	31.4	15.4	1519.4	371.2	56.5	3228	259.2	16	15.4	498
01.06.2016 15:01:55	312.7	49.3	18.6	622.3	342	85.5	3234	263.4	30.7	18.6	504
01.06.2016 15:02:01	358.2	65.9	22.7	1292	418.2	111.8	3240	292.3	43.2	22.7	510
01.06.2016 15:02:07	387.4	69.1	22	1154.2	440.9	109.4	3246	318.3	47.1	22	516
01.06.2016 15:02:13	320.1	31.3	14.6	1063.2	359	67.8	3252	288.8	16.7	14.6	522
01.06.2016 15:02:19	180	42.5	15	443.5	198.4	62.6	3258	137.5	27.5	15	528
01.06.2016 15:02:25	288.4	36.7	15.4	834.1	329.7	68.9	3264	251.7	21.3	15.4	534
01.06.2016 15:02:31	274.3	49.1	16.1	599.7	308.7	79	3270	225.2	33	16.1	540
01.06.2016 15:02:37	245.7	26.7	14.4	922.4	302.5	57.5	3276	219	12.3	14.4	546
01.06.2016 15:02:43	231	45.9	15.6	362.3	231.9	74.2	3282	185.1	30.3	15.6	552
01.06.2016 15:02:49	132.1	23.8	12.1	239.7	142.1	41.1	3288	108.3	11.7	12.1	558
01.06.2016 15:02:55	212.1	32	14.9	292.3	204.4	55	3294	180.1	17.1	14.9	564
01.06.2016 15:03:01	161	28.4	15.4	304	167.4	47.2	3300	132.6	13	15.4	570
01.06.2016 15:03:07	94.1	24.8	13.3	175.1	108.7	39	3306	69.3	11.5	13.3	576
01.06.2016 15:03:13	149	25.5	13.3	457.4	182.4	44.8	3312	123.5	12.2	13.3	582
01.06.2016 15:03:19	181.1	36.9	15	400	195.5	56.2	3318	144.2	21.9	15	588
01.06.2016 15:03:25	163.9	17	11.5	403.5	186.2	35.8	3324	146.9	5.5	11.5	594
01.06.2016 15:03:31	240.8	47.7	17.8	456.7	248.7	70.2	3330	193.1	29.9	17.8	600
01.06.2016 15:03:37	173.4	35.5	15.3	365.6	194	57.1	3336	137.9	20.2	15.3	606
01.06.2016 15:03:43	141.4	31.5	14.7	222.8	146.6	44.6	3342	109.9	16.8	14.7	612
01.06.2016 15:03:49	134	27.7	12.4	155	122.6	43.2	3348	106.3	15.3	12.4	618
01.06.2016 15:03:55	120.5	38.9	14.8	185.3	135.7	58.7	3354	81.6	24.1	14.8	624
01.06.2016 15:04:01	150.7	28.8	13.7	210.3	149.7	47.1	3360	121.9	15.1	13.7	630
01.06.2016 15:04:07	160.2	43.2	15.5	345.6	173.8	62.5	3366	117	27.7	15.5	636
01.06.2016 15:04:13	194.5	41.4	17.2	366.6	214.9	67.8	3372	153.1	24.2	17.2	642
01.06.2016 15:04:19	178.6	47.2	17.6	233.5	177.2	71.1	3378	131.4	29.6	17.6
01.06.2016 15:04:25	188.6	22.7	13.2	294.1	183.1	45.8	3384	165.9	9.5	13.2
01.06.2016 15:04:31	145.5	34.7	15.5	299.2	165	56.4	3390	110.8	19.2	15.5
01.06.2016 15:04:37	186.2	45.8	17.7	279.6	187.2	65.2	3396	140.4	28.1	17.7
01.06.2016 15:04:43	178.8	31.1	15.2	366.6	193.1	54.6	3402	147.7	15.9	15.2
01.06.2016 15:04:49	138.7	40.1	15	183.3	141.6	60.2	3408	98.6	25.1	15
01.06.2016 15:04:55	125.4	35.6	14.2	183.2	125.1	50	3414	89.8	21.4	14.2
01.06.2016 15:05:01	131.7	39.3	14.6	213.2	136.5	56.7	3420	92.4	24.7	14.6
01.06.2016 15:05:07	129.5	30.6	15.1	183.7	131.1	45.6	3426	98.9	15.5	15.1
01.06.2016 15:05:13	117.5	29.1	14.9	165.3	117.2	45.5	3432	88.4	14.2	14.9
01.06.2016 15:05:19	118.2	23.9	13.6	119.9	104.7	38.3	3438	94.3	10.3	13.6
01.06.2016 15:05:25	156.7	38.4	17.5	236.8	157.2	55	3444	118.3	20.9	17.5
01.06.2016 15:05:31	138.5	37.4	15.9	313.5	145.6	51.8	3450	101.1	21.5	15.9
01.06.2016 15:05:37	159.8	42.6	15.7	223.6	162.7	62.7	3456	117.2	26.9	15.7
01.06.2016 15:05:43	102.9	34.4	15.4	102.9	98.7	52.1	3462	68.5	19	15.4
01.06.2016 15:05:49	111.2	28.7	15.7	180.3	120.4	47.4	3468	82.5	13	15.7
01.06.2016 15:05:55	138	24.6	14.1	154.3	124.9	42.7	3474	113.4	10.5	14.1
01.06.2016 15:06:01	75.3	18	11.9	76	69.3	29.5	3480	57.3	6.1	11.9
01.06.2016 15:06:07	55.2	19.1	11.1	60.2	52.9	27.5	3486	36.1	8	11.1
01.06.2016 15:06:13	88.7	22.1	12.6	137.2	86.9	30.2	3492	66.6	9.5	12.6
01.06.2016 15:06:19	75.3	17.4	11.8	81.3	67.9	26.5	3498	57.9	5.6	11.8
01.06.2016 15:06:25	71.3	20.7	11.3	77.3	64.3	28	3504	50.6	9.4	11.3
01.06.2016 15:06:31	58.1	16	10.5	240.3	57.4	25.2	3510	42.1	5.5	10.5
01.06.2016 15:06:37	44	21.4	11.5	143.6	47.8	27.6	3516	22.6	9.9	11.5
01.06.2016 15:06:43	50.7	25.9	12.2	72.7	55.4	32.7	3522	24.8	13.7	12.2
01.06.2016 15:06:49	69.4	17.9	11.8	110.9	71.7	23.7	3528	51.5	6.1	11.8
01.06.2016 15:06:55	73.9	26.7	13.1	79.2	70	36.8	3534	47.2	13.6	13.1
01.06.2016 15:07:01	74.6	15.5	11.6	75	69.7	29.4	3540	59.1	3.9	11.6
01.06.2016 15:07:07	104.1	24.1	14.2	189.4	109.2	38.8	3546	80	9.9	14.2
01.06.2016 15:07:13	87.1	28.8	14.9	151.9	95.6	39.5	3552	58.3	13.9	14.9
01.06.2016 15:07:19	115.2	28.2	13.6	169.4	119.4	43.7	3558	87	14.6	13.6
01.06.2016 15:07:25	55.5	17	11.9	56.2	51.4	25.5	3564	38.5	5.1	11.9
01.06.2016 15:07:31	55.5	20.6	13	113.8	57.8	27	3570	34.9	7.6	13
01.06.2016 15:07:37	67.2	16.5	12.3	167.5	66.4	25.6	3576	50.7	4.2	12.3
01.06.2016 15:07:43	56.7	21.9	12.8	78.3	59.9	28.4	3582	34.8	9.1	12.8
01.06.2016 15:07:49	62.1	25.1	12.8	67.4	58.4	32.6	3588	37	12.3	12.8
01.06.2016 15:07:55	54.5	27.8	13.7	92	61.4	36.6	3594	26.7	14.1	13.7
01.06.2016 15:08:01	61.5	17.5	11.6	66.4	57.3	25.6	3600	44	5.9	11.6
01.06.2016 15:08:07	53.4	16.7	12.1	54.1	48.4	22.5	3606	36.7	4.6	12.1
01.06.2016 15:08:13	43	22.9	12.3	47.9	41.9	27.5	3612	20.1	10.6	12.3
01.06.2016 15:08:19	63.8	18	12.6	91.1	64.6	24.1	3618	45.8	5.4	12.6
01.06.2016 15:08:25	60.8	20.8	12.5	98.3	65	28.9	3624	40	8.3	12.5
01.06.2016 15:08:31	40.6	19	11.8	41	38.5	24.2	3630	21.6	7.2	11.8
01.06.2016 15:08:37	49	18.6	12.1	54.3	45.6	24.1	3636	30.4	6.5	12.1
01.06.2016 15:08:43	40.2	14.2	12.3	40.5	37.8	20.2	3642	26	1.9	12.3
01.06.2016 15:08:49	50.6	18.2	12.3	56	46.9	23.3	3648	32.4	5.9	12.3
01.06.2016 15:08:55	62.1	21.7	14.2	130	64.6	27.3	3654	40.4	7.5	14.2
01.06.2016 15:09:01	62	18.7	13.3	72.3	57.3	25	3660	43.3	5.4	13.3
01.06.2016 15:09:07	43.3	20.1	12.3	48.3	42.1	25.8	3666	23.2	7.8	12.3
01.06.2016 15:09:13	62.3	19.7	11.8	220.8	78.3	25.9	3672	42.6	7.9	11.8
01.06.2016 15:09:19	46.7	17.5	11.6	51.7	44.3	22.9	3678	29.2	5.9	11.6
01.06.2016 15:09:25	51.3	18.2	12.9	73.6	54	24.6	3684	33.1	5.3	12.9
01.06.2016 15:09:31	44.2	18.4	12.2	44.6	41	22.7	3690	25.8	6.2	12.2
01.06.2016 15:09:37	52	19.5	12.1	57.6	47.6	24.2	3696	32.5	7.4	12.1
01.06.2016 15:09:43	48.9	15.4	11.8	49.3	44.6	20.4	3702	33.5	3.6	11.8
01.06.2016 15:09:49	57.3	28	14.9	83.9	61.8	33.9	3708	29.3	13.1	14.9
01.06.2016 15:09:55	72	13.4	10.9	73.4	61.5	17.9	3714	58.6	2.5	10.9
01.06.2016 15:10:01	45	19.2	11.3	50.4	41.8	23.1	3720	25.8	7.9	11.3
01.06.2016 15:10:07	40.6	13.8	11	62.6	44.2	18.4	3726	26.8	2.8	11
01.06.2016 15:10:13	35.4	16.1	10.7	40.3	33.4	18.7	3732	19.3	5.4	10.7
01.06.2016 15:10:19	37	12.9	11	58.6	40.3	15.9	3738	24.1	1.9	11
01.06.2016 15:10:25	32.8	15.2	10.8	33.1	30.9	19.2	3744	17.6	4.4	10.8
01.06.2016 15:10:31	35.8	13.2	11.2	36.1	33	17.4	3750	22.6	2	11.2
01.06.2016 15:10:37	26.3	14.4	11.5	26.3	25.9	18.3	3756	11.9	2.9	11.5
01.06.2016 15:10:43	26.4	15.1	9.9	26.4	25.9	18.1	3762	11.3	5.2	9.9
01.06.2016 15:10:49	49.8	18.2	14	50.5	45.2	23	3768	31.6	4.2	14
01.06.2016 15:10:55	33.4	18.4	12.8	33.7	31.6	21.6	3774	15	5.6	12.8
01.06.2016 15:11:01	46.5	22	15	51.8	43.9	26.6	3780	24.5	7	15
01.06.2016 15:11:07	79.9	22.1	13.8	95.5	73	29.2	3786	57.8	8.3	13.8
01.06.2016 15:11:13	62.7	18.3	13.2	73	57.4	23.7	3792	44.4	5.1	13.2
01.06.2016 15:11:19	26	18.1	13.4	83.6	32.7	20.9	3798	7.9	4.7	13.4
01.06.2016 15:11:25	45.8	16.5	11.6	51.1	42.1	20.5	3804	29.3	4.9	11.6
01.06.2016 15:11:31	29.9	13.5	11.9	30.3	28.1	17	3810	16.4	1.6	11.9
01.06.2016 15:11:37	24.9	13.4	12.9	24.9	24.3	16.4	3816	11.5	0.5	12.9
01.06.2016 15:11:43	43.4	13.8	12.5	44.4	37.3	16	3822	29.6	1.3	12.5
01.06.2016 15:11:49	24	17.9	12.6	24	23.9	20.3	3828	6.1	5.3	12.6
01.06.2016 15:11:55	31.8	14.5	11.4	32.2	29.6	17.4	3834	17.3	3.1	11.4
01.06.2016 15:12:01	36.2	14.8	11.4	36.9	32.6	17.5	3840	21.4	3.4	11.4
01.06.2016 15:12:07	21.6	14.6	12	21.6	21.5	17	3846	7	2.6	12
01.06.2016 15:12:13	25.8	14.4	12.7	25.8	25.3	17.8	3852	11.4	1.7	12.7
01.06.2016 15:12:19	21	12.1	10.5	21	20.5	13.9	3858	8.9	1.6	10.5
01.06.2016 15:12:25	31.3	12.3	11.9	31.7	29	15.7	3864	19	0.4	11.9
01.06.2016 15:12:31	41.4	15.6	12.7	46.4	39.1	19.7	3870	25.8	2.9	12.7
01.06.2016 15:12:37	17.8	12.8	10.9	17.8	17.7	14.7	3876	5	1.9	10.9
01.06.2016 15:12:43	25	11.2	9.8	25	23.9	14.2	3882	13.8	1.4	9.8
01.06.2016 15:12:49	30.1	17.9	13.1	30.4	28.4	20.6	3888	12.2	4.8	13.1
01.06.2016 15:12:55	31.4	13.7	12.8	53.3	35.4	15.9	3894	17.7	0.9	12.8
01.06.2016 15:13:01	33.4	11.6	11.6	38.7	30	12.9	3900	21.8	0	11.6
01.06.2016 15:13:07	21.1	15.3	11.8	21.1	21	17.5	3906	5.8	3.5	11.8
01.06.2016 15:13:13	20.7	14.4	11.6	20.7	20.5	16.2	3912	6.3	2.8	11.6
01.06.2016 15:13:19	34.4	17.1	13.5	34.4	33	20.7	3918	17.3	3.6	13.5
01.06.2016 15:13:25	28	16.3	11.7	49.9	32.9	18	3924	11.7	4.6	11.7
01.06.2016 15:13:31	17.3	12.9	11.1	17.3	17.3	14.5	3930	4.4	1.8	11.1
01.06.2016 15:13:37	24	14.7	11.5	24	23.2	16.8	3936	9.3	3.2	11.5
01.06.2016 15:13:43	24.5	17.4	15.6	46.1	30.3	18.3	3942	7.1	1.8	15.6
01.06.2016 15:13:49	15.5	13	11.2	15.5	15.5	14.1	3948	2.5	1.8	11.2
01.06.2016 15:13:55	13.1	11.3	10.4	50.6	20.7	12.1	3954	1.8	0.9	10.4
01.06.2016 15:14:01	25.1	14.1	12.2	25.1	24.3	16.6	3960	11	1.9	12.2
01.06.2016 15:14:07	19.5	14.5	11.7	41.1	25.8	15.2	3966	5	2.8	11.7
01.06.2016 15:14:13	11	11	10.6	11	11	11	3972	0	0.4	10.6
01.06.2016 15:14:19	17.8	16.6	12.8	17.8	17.8	17.1	3978	1.2	3.8	12.8
01.06.2016 15:14:25	29.1	17.6	14.6	29.4	27.3	19.2	3984	11.5	3	14.6
01.06.2016 15:14:31	18.3	15.1	13.2	18.3	18.3	16.2	3990	3.2	1.9	13.2
01.06.2016 15:14:37	34.4	16.4	11.9	39.7	31.9	18.4	3996	18	4.5	11.9
01.06.2016 15:14:43	28.4	14.2	11.7	28.7	26.5	16.7	4002	14.2	2.5	11.7
01.06.2016 15:14:49	19.8	16.1	14	19.8	19.8	17.8	4008	3.7	2.1	14
01.06.2016 15:14:55	28.5	15.9	14.2	128.5	31.8	17.8	4014	12.6	1.7	14.2
01.06.2016 15:15:01	36.5	14.2	13.1	79.7	40	15.1	4020	22.3	1.1	13.1
01.06.2016 15:15:07	24	14.9	12.3	24	23.6	17.3	4026	9.1	2.6	12.3
01.06.2016 15:15:13	37.1	12.7	12.2	42.7	32.9	14.9	4032	24.4	0.5	12.2

## Sheet: 6OS
date & time	PM10 [ug/m3]	PM2,5 [ug/m3]	PM1 [ug/m3]	Inhalable [ug/m3]	Thoracic [ug/m3]	Alveolic [ug/m3]	Zeit in sek	2.5 bis 10	1 bis 2.5	kleiner 1
02.06.2016 08:32:31	48.4	38.6	37	48.7	46.7	39.9	6	9.8	1.6	37
02.06.2016 08:32:37	40.8	38.9	36.1	40.8	40.8	39.7	12	1.9	2.8	36.1		Sägedauer	48			Temperature [°C]	Humidity [%rH]
02.06.2016 08:32:43	44.6	40.1	37.7	44.6	44.2	41.1	18	4.5	2.4	37.7						24.19	54.79
02.06.2016 08:32:49	52.2	36.6	35.6	57.5	49.7	37.6	24	15.6	1	35.6						24.19	54.9
02.06.2016 08:32:55	40.7	36.9	34.7	40.7	40.7	38.6	30	3.8	2.2	34.7						24	55.21
02.06.2016 08:33:01	38.8	38.1	36.9	38.8	38.8	38.4	36	0.7	1.2	36.9						23.81	55.63
02.06.2016 08:33:07	41.6	39.1	36.8	41.6	41.6	40.2	42	2.5	2.3	36.8						23.61	56.05
02.06.2016 08:33:13	42.2	33.4	32.2	47.2	41.4	34.1	48	8.8	1.2	32.2						23.52	56.57
02.06.2016 08:33:19	45.6	35.1	33.6	50.6	44.7	36.2	54	10.5	1.5	33.6						23.42	56.99
02.06.2016 08:33:25	39.4	37.4	34	39.4	39.4	38.3	60	2	3.4	34						23.33	57.09
02.06.2016 08:33:31	51.8	44	40.4	151.4	56.6	46.5	66	7.8	3.6	40.4						23.23	56.78
02.06.2016 08:33:37	57.5	37.2	36.2	62.5	54.8	38.6	72	20.3	1	36.2						23.42	56.15
02.06.2016 08:33:43	44.8	44.7	43.9	44.8	44.8	44.7	78	0.1	0.8	43.9						23.81	53.33
02.06.2016 08:33:49	54	46	43.7	113.1	68.1	48.4	84	8	2.3	43.7						23.81	51.03
02.06.2016 08:33:55	82.6	48.2	41.8	83.3	78.1	54.5	90	34.4	6.4	41.8						23.61	50.2
02.06.2016 08:34:01	48.7	41.6	40.4	48.7	48.5	44	96	7.1	1.2	40.4						23.52	50.93
02.06.2016 08:34:07	105.8	55.1	37.5	288.4	103.5	66	102	50.7	17.6	37.5						23.33	52.29
02.06.2016 08:34:13	180.4	73.5	52.5	459.3	199.5	92.8	108	106.9	21	52.5						23.23	52.91
02.06.2016 08:34:19	144.9	83.8	51.8	684.2	184.3	99.7	114	61.1	32	51.8						23.14	54.79
02.06.2016 08:34:25	103.4	50.7	36.8	505.4	120.3	61	120	52.7	13.9	36.8						23.04	55.84
02.06.2016 08:34:31	69.8	36.9	28.2	167.1	88.1	43.8	126	32.9	8.7	28.2						22.94	56.57
02.06.2016 08:34:37	93	43	32	162.8	101.4	50.5	132	50	11	32						22.94	57.4
02.06.2016 08:34:43	85.1	56.2	34.6	85.5	82.7	63.5	138	28.9	21.6	34.6						22.85	57.92
02.06.2016 08:34:49	39.7	24.4	23	223.8	55.9	24.8	144	15.3	1.4	23						22.85	58.55
02.06.2016 08:34:55	37.7	26.6	22.9	37.7	37.4	30.2	150	11.1	3.7	22.9						22.85	58.55
02.06.2016 08:35:01	72.2	35	26.1	177.8	71.2	38.4	156	37.2	8.9	26.1						22.75	58.97
02.06.2016 08:35:07	27.2	26	23.1	84.9	34.1	26.6	162	1.2	2.9	23.1						22.75	59.18
02.06.2016 08:35:13	32.7	27.8	26	90.4	39.5	29.3	168	4.9	1.8	26						22.75	58.97
02.06.2016 08:35:19	43.3	34	28.4	225.1	46.1	37.1	174	9.3	5.6	28.4						22.75	58.97
02.06.2016 08:35:25	57.6	36.6	32.1	58.3	53.5	38.8	180	21	4.5	32.1						22.85	59.39
02.06.2016 08:35:31	50.5	42.4	39.6	108.1	57.2	45.3	186	8.1	2.8	39.6						22.85	59.49
02.06.2016 08:35:37	68.5	40.5	39.8	131.8	71.1	43.2	192	28	0.7	39.8						22.85	59.39
02.06.2016 08:35:43	50.1	38.7	35.8	76.6	55.8	40.1	198	11.4	2.9	35.8						22.85	59.6
02.06.2016 08:35:49	42.4	32.5	31.2	64	48.7	35.4	204	9.9	1.3	31.2						22.85	60.12
02.06.2016 08:35:55	57.3	43.2	40.7	116.5	70.2	45.3	210	14.1	2.5	40.7						22.85	59.6
02.06.2016 08:36:01	78.2	39.6	37.4	270.4	76.3	43.4	216	38.6	2.2	37.4						22.85	58.66
02.06.2016 08:36:07	47.7	42.9	42	47.7	47.6	44.7	222	4.8	0.9	42						22.85	57.4
02.06.2016 08:36:13	59	48	42.1	59	58.8	51.8	228	11	5.9	42.1						22.85	57.09
02.06.2016 08:36:19	43.2	28.8	26.9	43.2	43	34.6	234	14.4	1.9	26.9						22.85	56.46
02.06.2016 08:36:25	49.6	34.8	33.3	54.6	48.6	37.4	240	14.8	1.5	33.3						22.85	54.9
02.06.2016 08:36:31	47.6	35.4	31.3	69.2	54	39	246	12.2	4.1	31.3						22.85	53.23
02.06.2016 08:36:37	41.9	28.8	28.5	63.5	47.9	32	252	13.1	0.3	28.5						22.85	51.76
02.06.2016 08:36:43	37	30.3	29.2	37	36.6	31.9	258	6.7	1.1	29.2						22.85	52.5
02.06.2016 08:36:49	59.3	50.7	46.1	59.3	58.4	52.4	264	8.6	4.6	46.1						22.75	53.75
02.06.2016 08:36:55	53.5	34.7	32.7	58.5	51.5	36.8	270	18.8	2	32.7						22.75	55
02.06.2016 08:37:01	47.6	34.7	31.7	85.5	53.5	37	276	12.9	3	31.7						22.85	55.94
02.06.2016 08:37:07	42.3	38.7	35.6	42.3	42.2	40	282	3.6	3.1	35.6						22.85	56.78
02.06.2016 08:37:13	51.8	38.4	35	51.8	51.2	42.3	288	13.4	3.4	35						22.85	57.4
02.06.2016 08:37:19	61.1	47.9	46.6	66	60.1	50.2	294	13.2	1.3	46.6						22.85	57.61
02.06.2016 08:37:25	58.4	43.2	41.2	58.8	55.9	45.2	300	15.2	2	41.2						22.85	57.82
02.06.2016 08:37:31	63.7	60.3	58.4	63.7	63.7	61.8	306	3.4	1.9	58.4						22.85	58.13
02.06.2016 08:37:37	61.1	59.3	56.2	61.1	61.1	60.1	312	1.8	3.1	56.2						22.85	58.24
02.06.2016 08:37:43	57.4	53.1	50.3	57.4	57.3	55	318	4.3	2.8	50.3						22.85	58.03
02.06.2016 08:37:49	69.8	59.9	57.2	70.2	68.1	61.3	324	9.9	2.7	57.2						22.94	58.13
02.06.2016 08:37:55	82.2	71.7	67.8	82.2	81	73.6	330	10.5	3.9	67.8						22.94	58.13
02.06.2016 08:38:01	74.4	62.4	61.3	79.3	73.4	63.8	336	12	1.1	61.3						22.94	58.13
02.06.2016 08:38:07	42.1	40.6	38.5	42.1	42.1	41.3	342	1.5	2.1	38.5						22.94	58.55
02.06.2016 08:38:13	35.8	34.9	33.1	35.8	35.8	35.3	348	0.9	1.8	33.1						22.94	58.76
02.06.2016 08:38:19	51.2	47.7	44.3	51.2	51.2	49.3	354	3.5	3.4	44.3						23.04	58.86
02.06.2016 08:38:25	69.9	64.2	60.5	69.9	69.8	66.1	360	5.7	3.7	60.5						23.04	58.86
02.06.2016 08:38:31	63.6	48.4	47.4	69	61.2	49.2	366	15.2	1	47.4						23.04	58.86
02.06.2016 08:38:37	78	75.3	71.4	99.6	84.6	76	372	2.7	3.9	71.4						23.04	57.61
02.06.2016 08:38:43	73.5	71.1	69.4	173.1	78.7	72.2	378	2.4	1.7	69.4						23.04	57.3
02.06.2016 08:38:49	36.6	35.2	34.5	58.2	43.2	35.4	384	1.4	0.7	34.5						23.14	56.57
02.06.2016 08:38:55	86.1	72.4	71.8	86.8	82.9	73	390	13.7	0.6	71.8						23.14	54.79
02.06.2016 08:39:01	91.8	88	85.5	91.8	91.7	89.3	396	3.8	2.5	85.5						23.14	52.29
02.06.2016 08:39:07	75.7	72.6	70.4	75.7	75.6	74	402	3.1	2.2	70.4						23.04	50.72
02.06.2016 08:39:13	46	46	45.6	46	46	46	408	0	0.4	45.6						23.04	50.83
02.06.2016 08:39:19	81.7	71.9	70.6	86.7	80.8	72.7	414	9.8	1.3	70.6						23.04	52.08
02.06.2016 08:39:25	60.7	50.6	48	60.7	59.8	52.7	420	10.1	2.6	48						23.04	53.85
02.06.2016 08:39:31	52.5	40.9	38.7	57.5	51.6	42.5	426	11.6	2.2	38.7						23.04	55.42
02.06.2016 08:39:37	42.4	38.3	37	42.4	42.3	39.8	432	4.1	1.3	37						23.04	56.25
02.06.2016 08:39:43	64.1	58.6	56.5	64.1	64	60.7	438	5.5	2.1	56.5						23.04	56.88
02.06.2016 08:39:49	49.3	49.3	49.1	49.3	49.3	49.3	444	0	0.2	49.1						23.04	57.09
02.06.2016 08:39:55	47.2	42.6	41.6	68.8	53.7	43.9	450	4.6	1	41.6						23.04	57.19
02.06.2016 08:40:01	47.5	42.8	39.8	69.1	54	44.1	456	4.7	3	39.8						23.04	57.4
02.06.2016 08:40:07	35.7	35.6	34.5	35.7	35.7	35.7	462	0.1	1.1	34.5						23.14	57.61
02.06.2016 08:40:13	64.3	59.5	59	64.3	64	60.7	468	4.8	0.5	59						23.14	57.82
02.06.2016 08:40:19	48.2	42.9	41.9	48.2	47.8	43.9	474	5.3	1	41.9						23.14	57.92
02.06.2016 08:40:25	47.7	47.7	47.4	47.7	47.7	47.7	480	0	0.3	47.4						23.14	58.13
02.06.2016 08:40:31	45.5	45.4	44.9	45.5	45.5	45.4	486	0.1	0.5	44.9						23.14	58.13
02.06.2016 08:40:37	87.5	77.4	75.6	87.8	85.8	78.8	492	10.1	1.8	75.6						23.14	58.24
02.06.2016 08:40:43	64.8	48.1	47.6	305	71.4	49.7	498	16.7	0.5	47.6						23.14	58.34
02.06.2016 08:40:49	71.2	69.2	68.5	71.2	71.2	70.1	504	2	0.7	68.5						23.14	58.13
02.06.2016 08:40:55	87.5	69.1	65.2	87.9	84.3	71.1	510	18.4	3.9	65.2						23.23	57.82
02.06.2016 08:41:01	73.9	71.6	69.9	73.9	73.9	72.7	516	2.3	1.7	69.9						23.23	56.46
02.06.2016 08:41:07	62.3	62.3	62.1	62.3	62.3	62.3	522	0	0.2	62.1						23.23	55.73
02.06.2016 08:41:13	60.3	59.3	55.8	60.3	60.3	59.7	528	1	3.5	55.8						23.23	54.37
02.06.2016 08:41:19	65.4	56.5	55.6	65.8	63.8	57.8	534	8.9	0.9	55.6						23.23	51.87
02.06.2016 08:41:25	65.8	63.1	62.5	65.8	65.7	64	540	2.7	0.6	62.5						23.23	51.14
02.06.2016 08:41:31	50.1	50	48.9	50.1	50.1	50	546	0.1	1.1	48.9						23.14	50.62
02.06.2016 08:41:37	63.3	63.2	62.7	63.3	63.3	63.2	552	0.1	0.5	62.7						23.14	51.97
02.06.2016 08:41:43	65.2	65.1	63.4	65.2	65.2	65.2	558	0.1	1.7	63.4						23.14	53.12
02.06.2016 08:41:49	71	70.2	69.4	71	70.9	70.6	564	0.8	0.8	69.4						23.14	54.06
02.06.2016 08:41:55	78.2	73.7	71.3	78.2	77.9	74.7	570	4.5	2.4	71.3						23.14	55.63
02.06.2016 08:42:01	96.5	86.6	84.8	96.9	94.8	87.9	576	9.9	1.8	84.8						23.14	56.05
02.06.2016 08:42:07	101	97.5	96.3	101	100.9	98.7	582	3.5	1.2	96.3
02.06.2016 08:42:13	63.8	63.8	63.5	63.8	63.8	63.8	588	0	0.3	63.5
02.06.2016 08:42:19	63.6	61.8	59.6	63.6	63.6	62.6	594	1.8	2.2	59.6
02.06.2016 08:42:25	73.3	72.8	71.5	73.3	73.3	73	600	0.5	1.3	71.5
02.06.2016 08:42:31	68.6	66.3	65.1	68.6	68.6	67.3	606	2.3	1.2	65.1
02.06.2016 08:42:37	47.2	47	46.3	47.2	47.2	47.1	612	0.2	0.7	46.3
02.06.2016 08:42:43	51.5	50.7	47.7	51.5	51.5	51	618	0.8	3	47.7
02.06.2016 08:42:49	50.4	50	48.7	50.4	50.4	50.2	624	0.4	1.3	48.7
02.06.2016 08:42:55	60.4	60.4	60.1	60.4	60.4	60.4	630	0	0.3	60.1
02.06.2016 08:43:01	55.8	54	51.1	55.8	55.7	54.8	636	1.8	2.9	51.1
02.06.2016 08:43:07	48.9	48.2	45.7	48.9	48.9	48.5	642	0.7	2.5	45.7
02.06.2016 08:43:13	53	49.8	46.8	53	52.9	50.8	648	3.2	3	46.8
02.06.2016 08:43:19	60.3	52.9	50.9	60.6	58.6	53.5	654	7.4	2	50.9
02.06.2016 08:43:25	53.1	48.8	47.8	96.2	66.2	49.4	660	4.3	1	47.8
02.06.2016 08:43:31	46.8	40.1	38.8	46.8	45.9	41	666	6.7	1.3	38.8
02.06.2016 08:43:37	40.6	40.4	39.7	98.2	47.5	40.5	672	0.2	0.7	39.7
02.06.2016 08:43:43	38.9	38.9	38.4	38.9	38.9	38.9	678	0	0.5	38.4
02.06.2016 08:43:49	49	44	43.5	49	48.8	45.5	684	5	0.5	43.5
02.06.2016 08:43:55	53.7	48.9	46.8	53.7	53.6	50.7	690	4.8	2.1	46.8
02.06.2016 08:44:01	34.8	27.5	27	34.8	33.9	28.6	696	7.3	0.5	27
02.06.2016 08:44:07	24	21.7	21.1	24	24	22.7	702	2.3	0.6	21.1
02.06.2016 08:44:13	38.4	38.3	37.8	38.4	38.4	38.3	708	0.1	0.5	37.8
02.06.2016 08:44:19	41	41	40.4	41	41	41	714	0	0.6	40.4
02.06.2016 08:44:25	40.3	34	33.3	40.3	39.4	34.7	720	6.3	0.7	33.3
02.06.2016 08:44:31	42.5	40.1	38.3	42.5	42.4	40.8	726	2.4	1.8	38.3
02.06.2016 08:44:37	47.3	42.5	40.9	168.5	59	43.8	732	4.8	1.6	40.9
02.06.2016 08:44:43	32	31.9	31	32	32	31.9	738	0.1	0.9	31
02.06.2016 08:44:49	38.7	29.2	28	43.6	37.8	29.8	744	9.5	1.2	28
02.06.2016 08:44:55	43.4	34.6	33.5	48.4	42.5	35.3	750	8.8	1.1	33.5
02.06.2016 08:45:01	27	27	27	27	27	27	756	0	0	27
02.06.2016 08:45:07	22.1	22.1	22	22.1	22.1	22.1	762	0	0.1	22
02.06.2016 08:45:13	19.3	19.3	19.3	19.3	19.3	19.3	768	0	0	19.3
02.06.2016 08:45:19	23.8	23.8	23.7	23.8	23.8	23.8	774	0	0.1	23.7
02.06.2016 08:45:25	23.7	23.7	23.7	23.7	23.7	23.7	780	0	0	23.7
02.06.2016 08:45:31	23.4	23.4	23.3	23.4	23.4	23.4	786	0	0.1	23.3
02.06.2016 08:45:37	35.9	28.2	27.6	40.9	35.1	28.4	792	7.7	0.6	27.6
02.06.2016 08:45:43	31.2	31.2	31	31.2	31.2	31.2	798	0	0.2	31
02.06.2016 08:45:49	32.9	32.8	32.2	32.9	32.9	32.8	804	0.1	0.6	32.2
02.06.2016 08:45:55	48.1	48.1	47.4	48.1	48.1	48	810	0	0.7	47.4
02.06.2016 08:46:01	59.8	55.8	54.5	59.8	59.5	56.6	816	4	1.3	54.5
02.06.2016 08:46:07	67.6	52.4	50.9	89.9	70.9	53.2	822	15.2	1.5	50.9
02.06.2016 08:46:13	60.3	48.3	47.6	60.7	58.3	49.9	828	12	0.7	47.6
02.06.2016 08:46:19	52.6	49.5	48.2	52.6	52.5	50.5	834	3.1	1.3	48.2
02.06.2016 08:46:25	43.4	42.7	41.1	43.4	43.4	43	840	0.7	1.6	41.1
02.06.2016 08:46:31	43.6	43.2	42.5	43.6	43.6	43.4	846	0.4	0.7	42.5
02.06.2016 08:46:37	58.8	58.1	56.7	58.8	58.8	58.4	852	0.7	1.4	56.7
02.06.2016 08:46:43	47.3	47.3	47.2	47.3	47.3	47.3	858	0	0.1	47.2
02.06.2016 08:46:49	40.1	40.1	40.1	40.1	40.1	40.1	864	0	0	40.1
02.06.2016 08:46:55	42.4	41.1	39.8	42.4	42.4	41.7	870	1.3	1.3	39.8
02.06.2016 08:47:01	43.9	43.9	43.4	43.9	43.9	43.9	876	0	0.5	43.4
02.06.2016 08:47:07	32.6	32.6	32.3	32.6	32.6	32.6	882	0	0.3	32.3
02.06.2016 08:47:13	33.7	32.4	30.8	33.7	33.7	33	888	1.3	1.6	30.8
02.06.2016 08:47:19	36	35.5	34.7	36	36	35.7	894	0.5	0.8	34.7
02.06.2016 08:47:25	59	50.5	47.4	59.3	57.4	51.5	900	8.5	3.1	47.4
02.06.2016 08:47:31	49.6	44.1	42.1	49.6	49.4	45.8	906	5.5	2	42.1
02.06.2016 08:47:37	34.6	33.3	32.8	34.6	34.6	33.9	912	1.3	0.5	32.8
02.06.2016 08:47:43	30.8	30.8	30.7	30.8	30.8	30.8	918	0	0.1	30.7
02.06.2016 08:47:49	38	38	37.6	38	38	37.9	924	0	0.4	37.6
02.06.2016 08:47:55	52.2	51.2	49.8	52.2	52.2	51.6	930	1	1.4	49.8
02.06.2016 08:48:01	46	46	45.8	46	46	46	936	0	0.2	45.8
02.06.2016 08:48:07	57.9	53.8	50.9	57.9	57.8	54.9	942	4.1	2.9	50.9
02.06.2016 08:48:13	57.3	49.3	47.6	57.6	55.7	50.2	948	8	1.7	47.6
02.06.2016 08:48:19	48.1	45.4	44	48.1	48.1	46.6	954	2.7	1.4	44
02.06.2016 08:48:25	49.5	42.8	42.2	49.9	47.9	43.1	960	6.7	0.6	42.2
02.06.2016 08:48:31	58.2	55.8	53.6	58.2	58.2	56.9	966	2.4	2.2	53.6
02.06.2016 08:48:37	53.5	47.2	46.2	53.5	52.7	48.3	972	6.3	1	46.2
02.06.2016 08:48:43	53.4	45.6	45.2	53.7	51.7	46.3	978	7.8	0.4	45.2
02.06.2016 08:48:49	49.3	49.3	48.8	49.3	49.3	49.3	984	0	0.5	48.8
02.06.2016 08:48:55	40	40	39.1	40	40	40	990	0	0.9	39.1
02.06.2016 08:49:01	44	42.7	41.6	44	44	43.3	996	1.3	1.1	41.6
02.06.2016 08:49:07	44.7	42.6	41.1	44.7	44.7	43.2	1002	2.1	1.5	41.1
02.06.2016 08:49:13	52.8	40.1	35.5	74.7	57.7	42.2	1008	12.7	4.6	35.5
02.06.2016 08:49:19	35.8	35.7	34.9	35.8	35.8	35.7	1014	0.1	0.8	34.9
02.06.2016 08:49:25	49.7	42.5	40.1	49.7	48.8	43.6	1020	7.2	2.4	40.1
02.06.2016 08:49:31	49.1	44.2	42.2	49.1	49.1	46.4	1026	4.9	2	42.2
02.06.2016 08:49:37	66.1	58.3	49.9	66.1	66	61.4	1032	7.8	8.4	49.9
02.06.2016 08:49:43	44.1	42	38.7	44.1	44.1	42.9	1038	2.1	3.3	38.7
02.06.2016 08:49:49	55.2	48.4	42.8	55.2	55.1	51.1	1044	6.8	5.6	42.8
02.06.2016 08:49:55	42.2	42.1	40.8	42.2	42.2	42.2	1050	0.1	1.3	40.8
02.06.2016 08:50:01	45.1	31.2	29.6	45.8	41.9	31.9	1056	13.9	1.6	29.6
02.06.2016 08:50:07	36.8	34.3	31.6	36.8	36.7	35	1062	2.5	2.7	31.6
02.06.2016 08:50:13	33.8	33.7	32.7	33.8	33.8	33.8	1068	0.1	1	32.7
02.06.2016 08:50:19	63.3	52.3	46.6	68.3	62.4	53.6	1074	11	5.7	46.6
02.06.2016 08:50:25	64	52.8	50.5	64	63.3	55.4	1080	11.2	2.3	50.5
02.06.2016 08:50:31	46.5	41.7	38.8	46.5	46.5	43.8	1086	4.8	2.9	38.8
02.06.2016 08:50:37	51.5	47.5	44.9	89.1	59.1	48.6	1092	4	2.6	44.9
02.06.2016 08:50:43	41.4	41.4	41	41.4	41.4	41.4	1098	0	0.4	41
02.06.2016 08:50:49	64.1	48.2	44.2	246.3	65.1	50.8	1104	15.9	4	44.2
02.06.2016 08:50:55	54.2	50.3	44.7	54.2	54.2	52	1110	3.9	5.6	44.7
02.06.2016 08:51:01	45.4	39.9	34.6	45.4	45	41.3	1116	5.5	5.3	34.6
02.06.2016 08:51:07	37.6	37.1	35.8	37.6	37.6	37.3	1122	0.5	1.3	35.8
02.06.2016 08:51:13	83.3	79.2	74	83.3	83.3	80.7	1128	4.1	5.2	74
02.06.2016 08:51:19	99.6	77.9	67.2	104.5	98	81.9	1134	21.7	10.7	67.2
02.06.2016 08:51:25	86.5	79.3	70.9	181.7	101.1	82.2	1140	7.2	8.4	70.9
02.06.2016 08:51:31	63.7	52.3	45.7	68.7	62.8	54.2	1146	11.4	6.6	45.7
02.06.2016 08:51:37	59.5	45.4	41.7	64.5	58.3	47.1	1152	14.1	3.7	41.7
02.06.2016 08:51:43	47.5	41.2	38.4	47.5	47.2	43	1158	6.3	2.8	38.4
02.06.2016 08:51:49	87.8	83.2	74.6	87.8	87.7	85.3	1164	4.6	8.6	74.6
02.06.2016 08:51:55	57.3	55.8	51.7	57.3	57.3	56.4	1170	1.5	4.1	51.7
02.06.2016 08:52:01	67.2	59.8	52.4	110.4	80.4	62.2	1176	7.4	7.4	52.4
02.06.2016 08:52:07	51.3	47.8	44.7	51.3	51.2	49	1182	3.5	3.1	44.7
02.06.2016 08:52:13	50.3	46.8	42	50.3	50.2	48	1188	3.5	4.8	42
02.06.2016 08:52:19	44.3	40.8	37.6	44.3	44.2	42	1194	3.5	3.2	37.6
02.06.2016 08:52:25	42.9	40.2	37.8	42.9	42.8	41.1	1200	2.7	2.4	37.8
02.06.2016 08:52:31	39	36.6	35.3	39	38.9	37.3	1206	2.4	1.3	35.3
02.06.2016 08:52:37	33.5	32.1	30.4	33.5	33.5	32.7	1212	1.4	1.7	30.4
02.06.2016 08:52:43	37.6	34.6	31.4	37.6	37.6	35.9	1218	3	3.2	31.4
02.06.2016 08:52:49	34.2	31.5	30.2	34.2	34.2	32.4	1224	2.7	1.3	30.2
02.06.2016 08:52:55	42.9	32.8	30.4	42.9	41.7	34.5	1230	10.1	2.4	30.4
02.06.2016 08:53:01	36.4	36.4	36.3	36.4	36.4	36.4	1236	0	0.1	36.3
02.06.2016 08:53:07	52.3	48.7	42.8	52.3	52.3	50.3	1242	3.6	5.9	42.8
02.06.2016 08:53:13	39	34.8	32.7	39	38.9	36.7	1248	4.2	2.1	32.7
02.06.2016 08:53:19	28.9	27.9	27	66.4	36.6	28.4	1254	1	0.9	27
02.06.2016 08:53:25	30.1	30	28.9	30.1	30.1	30.1	1260	0.1	1.1	28.9
02.06.2016 08:53:31	37.6	35.5	33.5	37.6	37.6	36.4	1266	2.1	2	33.5
02.06.2016 08:53:37	32.2	32.2	31.5	32.2	32.2	32.2	1272	0	0.7	31.5
02.06.2016 08:53:43	59.2	40.3	38.1	69.2	57.5	41.9	1278	18.9	2.2	38.1
02.06.2016 08:53:49	52	40	36.8	52.3	50	41.6	1284	12	3.2	36.8
02.06.2016 08:53:55	48.5	40.2	37.4	48.8	46.8	41.1	1290	8.3	2.8	37.4
02.06.2016 08:54:01	62.8	47.7	41.1	63.5	59.5	48.9	1296	15.1	6.6	41.1
02.06.2016 08:54:07	39.4	37.2	34.2	39.4	39.4	38.2	1302	2.2	3	34.2
02.06.2016 08:54:13	45.9	34.5	32.3	50.9	44.8	35.3	1308	11.4	2.2	32.3
02.06.2016 08:54:19	44.7	37.8	36.2	82.6	50.8	38.1	1314	6.9	1.6	36.2
02.06.2016 08:54:25	43.4	27	25.8	70.3	47.6	27.9	1320	16.4	1.2	25.8
02.06.2016 08:54:31	36.1	34.6	31.3	36.1	36	35.3	1326	1.5	3.3	31.3
02.06.2016 08:54:37	34	30.6	29.4	34	33.9	31.7	1332	3.4	1.2	29.4
02.06.2016 08:54:43	24.6	24.5	24.1	24.6	24.6	24.5	1338	0.1	0.4	24.1
02.06.2016 08:54:49	35.1	33.2	31.5	35.1	35	33.7	1344	1.9	1.7	31.5
02.06.2016 08:54:55	35	31.5	27.8	35	35	32.7	1350	3.5	3.7	27.8
02.06.2016 08:55:01	26.2	24	21.4	26.2	26.2	25	1356	2.2	2.6	21.4
02.06.2016 08:55:07	24.9	24.8	23.7	24.9	24.9	24.9	1362	0.1	1.1	23.7
02.06.2016 08:55:13	25.8	25.8	25.1	25.8	25.8	25.8	1368	0	0.7	25.1
02.06.2016 08:55:19	28.3	27.4	25	28.3	28.3	27.8	1374	0.9	2.4	25
02.06.2016 08:55:25	31.3	30	27.1	31.3	31.2	30.5	1380	1.3	2.9	27.1
02.06.2016 08:55:31	35	26.9	24.5	40	34.2	27.3	1386	8.1	2.4	24.5
02.06.2016 08:55:37	23	22.3	20.8	23	23	22.6	1392	0.7	1.5	20.8
02.06.2016 08:55:43	29.5	19.5	19	34.5	28.6	20.3	1398	10	0.5	19
02.06.2016 08:55:49	20.1	20.1	20.1	20.1	20.1	20.1	1404	0	0	20.1
02.06.2016 08:55:55	25.5	22.8	22	25.5	25.4	23.6	1410	2.7	0.8	22
02.06.2016 08:56:01	24.7	23.4	21.8	24.7	24.7	23.9	1416	1.3	1.6	21.8
02.06.2016 08:56:07	23.1	23	22.6	23.1	23.1	23	1422	0.1	0.4	22.6
02.06.2016 08:56:13	25.3	24.3	22.5	25.3	25.3	24.8	1428	1	1.8	22.5
02.06.2016 08:56:19	25.1	23.3	22.8	25.1	25.1	24.1	1434	1.8	0.5	22.8
02.06.2016 08:56:25	29.5	28.2	26.2	29.5	29.5	28.8	1440	1.3	2	26.2
02.06.2016 08:56:31	32.5	32.5	32.3	32.5	32.5	32.5	1446	0	0.2	32.3
02.06.2016 08:56:37	19.9	19.9	19.9	19.9	19.9	19.9	1452	0	0	19.9
02.06.2016 08:56:43	26.4	26.4	25.8	26.4	26.4	26.4	1458	0	0.6	25.8
02.06.2016 08:56:49	26.4	22.5	21	26.4	26	23.2	1464	3.9	1.5	21
02.06.2016 08:56:55	31.6	26.4	25.1	31.6	30.8	27	1470	5.2	1.3	25.1
02.06.2016 08:57:01	23.3	23.2	21.9	23.3	23.3	23.3	1476	0.1	1.3	21.9
02.06.2016 08:57:07	25.7	24.3	22.1	25.7	25.7	24.9	1482	1.4	2.2	22.1
02.06.2016 08:57:13	25.1	23.8	22.5	25.1	25.1	24.4	1488	1.3	1.3	22.5
02.06.2016 08:57:19	26.8	23.8	22.7	26.8	26.8	25.2	1494	3	1.1	22.7
02.06.2016 08:57:25	21.9	21.9	21.7	21.9	21.9	21.9	1500	0	0.2	21.7
02.06.2016 08:57:31	25	23.8	22.7	25	25	24.4	1506	1.2	1.1	22.7
02.06.2016 08:57:37	21.8	21.3	19.9	21.8	21.8	21.5	1512	0.5	1.4	19.9
02.06.2016 08:57:43	22.9	22.9	22.9	22.9	22.9	22.9	1518	0	0	22.9
02.06.2016 08:57:49	26.8	25	24.1	26.8	26.8	25.4	1524	1.8	0.9	24.1
02.06.2016 08:57:55	31.4	25.4	23.6	31.4	30.6	26.4	1530	6	1.8	23.6
02.06.2016 08:58:01	27.7	26.9	24.9	27.7	27.7	27.3	1536	0.8	2	24.9
02.06.2016 08:58:07	20.7	20.2	19.5	20.7	20.7	20.4	1542	0.5	0.7	19.5
02.06.2016 08:58:13	24.6	24.6	24.1	24.6	24.6	24.6	1548	0	0.5	24.1
02.06.2016 08:58:19	19.4	19.4	19.4	19.4	19.4	19.4	1554	0	0	19.4
02.06.2016 08:58:25	29.2	28.9	27.7	29.2	29.2	29	1560	0.3	1.2	27.7
02.06.2016 08:58:31	21.2	21.2	21.1	21.2	21.2	21.2	1566	0	0.1	21.1
02.06.2016 08:58:37	32.8	31.1	27.6	32.8	32.8	31.8	1572	1.7	3.5	27.6
02.06.2016 08:58:43	38.5	20.3	20.1	48.4	36.7	21.5	1578	18.2	0.2	20.1
02.06.2016 08:58:49	23.5	21	20.5	23.5	23.4	22.1	1584	2.5	0.5	20.5
02.06.2016 08:58:55	23	21.1	19.5	23	22.9	21.6	1590	1.9	1.6	19.5
02.06.2016 08:59:01	19.4	19.4	19.3	19.4	19.4	19.4	1596	0	0.1	19.3
02.06.2016 08:59:07	23.2	23	21.7	23.2	23.2	23.1	1602	0.2	1.3	21.7
02.06.2016 08:59:13	19.4	19.4	19.1	19.4	19.4	19.4	1608	0	0.3	19.1
02.06.2016 08:59:19	25.7	20.7	20.3	25.7	25.3	21.6	1614	5	0.4	20.3
02.06.2016 08:59:25	18.2	18.1	16.8	18.2	18.2	18.2	1620	0.1	1.3	16.8
02.06.2016 08:59:31	22	21.7	20.9	22	22	21.8	1626	0.3	0.8	20.9
02.06.2016 08:59:37	20.8	20.6	19.7	20.8	20.8	20.7	1632	0.2	0.9	19.7
02.06.2016 08:59:43	22	21.2	18.4	22	22	21.5	1638	0.8	2.8	18.4
02.06.2016 08:59:49	20.4	20.4	20.2	20.4	20.4	20.4	1644	0	0.2	20.2
02.06.2016 08:59:55	28.6	21.9	20.1	66.1	35.5	23.2	1650	6.7	1.8	20.1
02.06.2016 09:00:01	29.8	21.6	19.2	34.7	28.9	22	1656	8.2	2.4	19.2
02.06.2016 09:00:07	20.5	19	18.3	20.5	20.5	19.6	1662	1.5	0.7	18.3
02.06.2016 09:00:13	22.1	20.8	18.9	22.1	22.1	21.4	1668	1.3	1.9	18.9
02.06.2016 09:00:19	18.7	18.7	18.7	18.7	18.7	18.7	1674	0	0	18.7
02.06.2016 09:00:25	21.8	21.8	21.3	21.8	21.8	21.8	1680	0	0.5	21.3
02.06.2016 09:00:31	18.4	18.4	17.7	18.4	18.4	18.4	1686	0	0.7	17.7
02.06.2016 09:00:37	20.7	20.7	20.6	20.7	20.7	20.7	1692	0	0.1	20.6
02.06.2016 09:00:43	27.1	20.6	19.2	27.1	26.3	21.7	1698	6.5	1.4	19.2
02.06.2016 09:00:49	17.2	17.2	16.6	17.2	17.2	17.2	1704	0	0.6	16.6
02.06.2016 09:00:55	17.4	17.4	17.2	1208.1	41.2	17.4	1710	0	0.2	17.2
02.06.2016 09:01:01	22.3	20.4	18.7	43.9	28.9	20.8	1716	1.9	1.7	18.7
02.06.2016 09:01:07	20.3	20.3	19.7	20.3	20.3	20.3	1722	0	0.6	19.7
02.06.2016 09:01:13	19.8	18.7	18.3	57.3	27.5	19.2	1728	1.1	0.4	18.3
02.06.2016 09:01:19	19.7	18.7	17.8	19.7	19.7	19.1	1734	1	0.9	17.8
02.06.2016 09:01:25	21	20.4	18.3	21	21	20.6	1740	0.6	2.1	18.3
02.06.2016 09:01:31	27.2	23.6	21.9	27.2	27.2	24.9	1746	3.6	1.7	21.9
02.06.2016 09:01:37	21.8	21.7	20.7	21.8	21.8	21.7	1752	0.1	1	20.7
02.06.2016 09:01:43	17.5	17.5	16.9	17.5	17.5	17.5	1758	0	0.6	16.9
02.06.2016 09:01:49	16	16	15.6	16	16	16	1764	0	0.4	15.6
02.06.2016 09:01:55	17.6	15.9	15.4	17.6	17.6	16.6	1770	1.7	0.5	15.4
02.06.2016 09:02:01	17.6	17.3	16.1	17.6	17.6	17.4	1776	0.3	1.2	16.1
02.06.2016 09:02:07	22.6	20.3	18.9	22.6	22.6	21	1782	2.3	1.4	18.9
02.06.2016 09:02:13	21.8	21.8	21.2	21.8	21.8	21.8	1788	0	0.6	21.2
02.06.2016 09:02:19	27	21.5	20.1	27	26.2	22.2	1794	5.5	1.4	20.1
02.06.2016 09:02:25	21.4	19.5	17.5	21.4	21.4	20	1800	1.9	2	17.5
02.06.2016 09:02:31	19.4	17.6	16.9	19.4	19.4	18.4	1806	1.8	0.7	16.9
02.06.2016 09:02:37	16.2	16.2	16.2	16.2	16.2	16.2	1812	0	0	16.2
02.06.2016 09:02:43	17.7	16.2	14.9	17.7	17.7	16.9	1818	1.5	1.3	14.9
02.06.2016 09:02:49	23.1	19.1	16.7	23.1	22.9	20.1	1824	4	2.4	16.7
02.06.2016 09:02:55	22.2	19	18.3	22.2	21.8	19.4	1830	3.2	0.7	18.3
02.06.2016 09:03:01	20.6	19.4	18.8	20.6	20.6	19.9	1836	1.2	0.6	18.8
02.06.2016 09:03:07	16.7	16.6	15.8	16.7	16.7	16.6	1842	0.1	0.8	15.8
02.06.2016 09:03:13	15.5	15.5	15	15.5	15.5	15.5	1848	0	0.5	15
02.06.2016 09:03:19	16.6	16.3	15.5	16.6	16.6	16.4	1854	0.3	0.8	15.5
02.06.2016 09:03:25	17.2	17.2	16.5	17.2	17.2	17.2	1860	0	0.7	16.5
02.06.2016 09:03:31	16.4	16.4	16.1	16.4	16.4	16.4	1866	0	0.3	16.1
02.06.2016 09:03:37	26	16.6	14.9	207.9	28.2	18.3	1872	9.4	1.7	14.9
02.06.2016 09:03:43	14.7	14.7	14.6	14.7	14.7	14.7	1878	0	0.1	14.6
02.06.2016 09:03:49	22.7	21	19.6	22.7	22.7	21.8	1884	1.7	1.4	19.6
02.06.2016 09:03:55	17.4	16.6	14.6	17.4	17.4	17	1890	0.8	2	14.6
02.06.2016 09:04:01	23.4	18.4	16.7	23.4	22.6	18.9	1896	5	1.7	16.7
02.06.2016 09:04:07	24.3	18.7	17.3	24.3	24	20.2	1902	5.6	1.4	17.3
02.06.2016 09:04:13	37.7	18	15.9	64.6	41.7	19.6	1908	19.7	2.1	15.9
02.06.2016 09:04:19	21.2	18.7	18.2	21.2	21.1	19.8	1914	2.5	0.5	18.2
02.06.2016 09:04:25	15.6	15.6	15.6	15.6	15.6	15.6	1920	0	0	15.6
02.06.2016 09:04:31	19.8	17.2	16.6	19.8	19.7	18	1926	2.6	0.6	16.6
02.06.2016 09:04:37	18.7	18.7	18.5	18.7	18.7	18.7	1932	0	0.2	18.5
02.06.2016 09:04:43	17.2	17.2	17	17.2	17.2	17.2	1938	0	0.2	17
02.06.2016 09:04:49	19.4	18.7	18	19.4	19.4	19.1	1944	0.7	0.7	18
02.06.2016 09:04:55	17.6	17	16.3	17.6	17.6	17.3	1950	0.6	0.7	16.3
02.06.2016 09:05:01	19.6	19.5	18.8	19.6	19.6	19.5	1956	0.1	0.7	18.8
02.06.2016 09:05:07	21.6	19.3	17.2	21.6	21.5	19.9	1962	2.3	2.1	17.2
02.06.2016 09:05:13	25.5	22.5	19.1	47.1	32.1	23.4	1968	3	3.4	19.1
02.06.2016 09:05:19	18.9	18.4	16.7	18.9	18.9	18.6	1974	0.5	1.7	16.7
02.06.2016 09:05:25	15.7	15.7	15.2	15.7	15.7	15.7	1980	0	0.5	15.2
02.06.2016 09:05:31	17.8	16.6	14	17.8	17.8	17.1	1986	1.2	2.6	14
02.06.2016 09:05:37	22.8	14.6	12.6	27.8	22	15	1992	8.2	2	12.6
02.06.2016 09:05:43	18.8	15.2	13.3	18.8	18.7	16.4	1998	3.6	1.9	13.3
02.06.2016 09:05:49	21.9	19.9	18.2	21.9	21.9	20.8	2004	2	1.7	18.2
02.06.2016 09:05:55	15.1	15.1	14.8	15.1	15.1	15.1	2010	0	0.3	14.8
02.06.2016 09:06:01	24.3	17.5	16	24.7	22.7	17.8	2016	6.8	1.5	16
02.06.2016 09:06:07	14.1	14.1	14.1	14.1	14.1	14.1	2022	0	0	14.1
02.06.2016 09:06:13	17.7	15.8	13.8	17.7	17.7	16.6	2028	1.9	2	13.8
02.06.2016 09:06:19	15.8	15.5	13.8	15.8	15.8	15.7	2034	0.3	1.7	13.8
02.06.2016 09:06:25	18.4	14.9	14	18.4	18.3	15.7	2040	3.5	0.9	14
02.06.2016 09:06:31	22.9	15.2	14.7	27.8	22	15.4	2046	7.7	0.5	14.7
02.06.2016 09:06:37	34.3	16.5	15.3	44.2	32.5	17.6	2052	17.8	1.2	15.3
02.06.2016 09:06:43	21	16.3	14	21	20.9	17.7	2058	4.7	2.3	14
02.06.2016 09:06:49	27.2	19.9	17.8	27.2	26.8	21.8	2064	7.3	2.1	17.8
02.06.2016 09:06:55	13.8	13.8	13.8	13.8	13.8	13.8	2070	0	0	13.8
02.06.2016 09:07:01	16.6	14.9	14.3	16.6	16.6	15.7	2076	1.7	0.6	14.3
02.06.2016 09:07:07	19.9	13.1	12.6	20.2	18.2	13.4	2082	6.8	0.5	12.6
02.06.2016 09:07:13	13.5	13.5	13.3	13.5	13.5	13.5	2088	0	0.2	13.3
02.06.2016 09:07:19	19.5	19.5	19.3	19.5	19.5	19.5	2094	0	0.2	19.3
02.06.2016 09:07:25	32.8	22.1	19.8	37.8	31.9	23.7	2100	10.7	2.3	19.8
02.06.2016 09:07:31	29.5	15.1	14	34.8	27.1	15.6	2106	14.4	1.1	14
02.06.2016 09:07:37	17.3	17.3	17.2	17.3	17.3	17.3	2112	0	0.1	17.2
02.06.2016 09:07:43	16.2	16.2	16.2	16.2	16.2	16.2	2118	0	0	16.2
02.06.2016 09:07:49	22.3	21	19.9	22.3	22.3	21.5	2124	1.3	1.1	19.9
02.06.2016 09:07:55	21.2	20.7	20	21.2	21.2	21	2130	0.5	0.7	20
02.06.2016 09:08:01	24.2	23	21.2	24.2	24.2	23.5	2136	1.2	1.8	21.2
02.06.2016 09:08:07	25.6	24.9	23.3	25.6	25.6	25.2	2142	0.7	1.6	23.3
02.06.2016 09:08:13	20.9	18.1	16.3	42.5	27.5	18.9	2148	2.8	1.8	16.3
02.06.2016 09:08:19	26.7	18.1	16.6	27.1	25.1	19.2	2154	8.6	1.5	16.6
02.06.2016 09:08:25	15.1	15.1	14.9	15.1	15.1	15.1	2160	0	0.2	14.9
02.06.2016 09:08:31	21.5	16.1	14.7	21.5	20.7	16.8	2166	5.4	1.4	14.7
02.06.2016 09:08:37	15.2	14.7	13.2	15.2	15.2	14.9	2172	0.5	1.5	13.2
02.06.2016 09:08:43	23.6	16.6	15.1	23.9	22	17	2178	7	1.5	15.1
02.06.2016 09:08:49	22.4	19.5	17.7	22.4	22.3	20.4	2184	2.9	1.8	17.7
02.06.2016 09:08:55	22	21.7	20.8	22	22	21.8	2190	0.3	0.9	20.8
02.06.2016 09:09:01	22.8	21.3	19.9	22.8	22.8	22	2196	1.5	1.4	19.9
02.06.2016 09:09:07	19.2	18.8	17.9	19.2	19.2	19	2202	0.4	0.9	17.9
02.06.2016 09:09:13	21.3	20	17.8	21.3	21.3	20.6	2208	1.3	2.2	17.8
02.06.2016 09:09:19	15.8	13.7	13.4	95	29.3	14.2	2214	2.1	0.3	13.4
02.06.2016 09:09:25	12.8	12.7	12.3	12.8	12.8	12.7	2220	0.1	0.4	12.3
02.06.2016 09:09:31	14.4	14.4	14.4	14.4	14.4	14.4	2226	0	0	14.4
02.06.2016 09:09:37	13.6	13.6	13.6	13.6	13.6	13.6	2232	0	0	13.6
02.06.2016 09:09:43	17.2	16	14.5	17.2	17.2	16.6	2238	1.2	1.5	14.5
02.06.2016 09:09:49	15.7	15.7	14.5	15.7	15.7	15.7	2244	0	1.2	14.5
02.06.2016 09:09:55	16.5	14.9	14.1	38.1	23.1	15.2	2250	1.6	0.8	14.1
02.06.2016 09:10:01	15.2	15.2	15.1	15.2	15.2	15.2	2256	0	0.1	15.1
02.06.2016 09:10:07	15.7	15.4	14.7	15.7	15.7	15.5	2262	0.3	0.7	14.7
02.06.2016 09:10:13	28.6	13.8	13	50.5	32.7	15.1	2268	14.8	0.8	13
02.06.2016 09:10:19	22.6	15.8	14.6	23	21	16.1	2274	6.8	1.2	14.6
02.06.2016 09:10:25	14.7	14.7	14.2	14.7	14.7	14.7	2280	0	0.5	14.2
02.06.2016 09:10:31	19.9	15.2	14.4	19.9	19.1	15.5	2286	4.7	0.8	14.4
02.06.2016 09:10:37	14.1	14.1	14.1	14.1	14.1	14.1	2292	0	0	14.1
02.06.2016 09:10:43	15	14.9	14.4	15	15	14.9	2298	0.1	0.5	14.4
02.06.2016 09:10:49	14.9	14.7	14	14.9	14.9	14.8	2304	0.2	0.7	14
02.06.2016 09:10:55	25.2	17.4	16.1	25.6	23.6	18.1	2310	7.8	1.3	16.1
02.06.2016 09:11:01	16.5	14.7	14.1	16.5	16.4	15.1	2316	1.8	0.6	14.1
02.06.2016 09:11:07	20.9	20.4	19.6	20.9	20.9	20.7	2322	0.5	0.8	19.6
02.06.2016 09:11:13	18	16.3	13.7	18	18	17.1	2328	1.7	2.6	13.7
02.06.2016 09:11:19	13.7	13.7	13.7	13.7	13.7	13.7	2334	0	0	13.7
02.06.2016 09:11:25	13.1	13	12.4	13.1	13.1	13	2340	0.1	0.6	12.4
02.06.2016 09:11:31	13.2	13.2	13.1	13.2	13.2	13.2	2346	0	0.1	13.1
02.06.2016 09:11:37	13.5	12.5	12	13.5	13.5	13	2352	1	0.5	12
02.06.2016 09:11:43	12.8	12.6	11.9	12.8	12.8	12.7	2358	0.2	0.7	11.9
02.06.2016 09:11:49	21.2	13.2	12	26.2	20.4	13.6	2364	8	1.2	12
02.06.2016 09:11:55	17.5	15.3	13.5	39.1	24.1	15.8	2370	2.2	1.8	13.5
02.06.2016 09:12:01	22.7	13.5	13	27.7	21.9	14	2376	9.2	0.5	13
02.06.2016 09:12:07	11.6	11.6	11.5	11.6	11.6	11.6	2382	0	0.1	11.5
02.06.2016 09:12:13	16.7	16.6	16.1	16.7	16.7	16.7	2388	0.1	0.5	16.1
02.06.2016 09:12:19	13.8	13.7	13.3	13.8	13.8	13.8	2394	0.1	0.4	13.3
02.06.2016 09:12:25	15.6	15.4	14.7	15.6	15.6	15.5	2400	0.2	0.7	14.7
02.06.2016 09:12:31	19.2	18.5	15.9	19.2	19.2	18.8	2406	0.7	2.6	15.9
02.06.2016 09:12:37	14.8	14.8	14.7	14.8	14.8	14.8	2412	0	0.1	14.7
02.06.2016 09:12:43	15	15	14.9	15	15	15	2418	0	0.1	14.9
02.06.2016 09:12:49	15.8	14.6	13.3	15.8	15.8	15.1	2424	1.2	1.3	13.3
02.06.2016 09:12:55	16.3	16.3	16.3	16.3	16.3	16.3	2430	0	0	16.3
02.06.2016 09:13:01	15.3	13.2	12.8	36.9	21.9	13.6	2436	2.1	0.4	12.8
02.06.2016 09:13:07	18	17.6	16.1	18	18	17.8	2442	0.4	1.5	16.1
02.06.2016 09:13:13	16	16	15.5	16	16	16	2448	0	0.5	15.5
02.06.2016 09:13:19	19.5	15.1	13.2	19.5	19.1	16	2454	4.4	1.9	13.2
02.06.2016 09:13:25	13.8	13.8	13.6	13.8	13.8	13.8	2460	0	0.2	13.6
02.06.2016 09:13:31	14.4	14.4	14.4	14.4	14.4	14.4	2466	0	0	14.4
02.06.2016 09:13:37	12.9	12.9	12.9	12.9	12.9	12.9	2472	0	0	12.9
02.06.2016 09:13:43	16	16	16	16	16	16	2478	0	0	16
02.06.2016 09:13:49	13.2	13.2	12.7	13.2	13.2	13.2	2484	0	0.5	12.7
02.06.2016 09:13:55	19	18.8	17.8	19	19	18.9	2490	0.2	1	17.8
02.06.2016 09:14:01	24.1	15.1	15	384.2	30.4	16.1	2496	9	0.1	15
02.06.2016 09:14:07	14.7	14.4	13.1	14.7	14.7	14.6	2502	0.3	1.3	13.1
02.06.2016 09:14:13	15.2	14.7	14	15.2	15.2	14.9	2508	0.5	0.7	14
02.06.2016 09:14:19	12.7	12.7	12.6	12.7	12.7	12.7	2514	0	0.1	12.6
02.06.2016 09:14:25	12.7	12.7	12.7	12.7	12.7	12.7	2520	0	0	12.7
02.06.2016 09:14:31	20.8	14.8	13	20.8	20	15.7	2526	6	1.8	13
02.06.2016 09:14:37	14.1	13.9	12.8	51.6	21.8	14	2532	0.2	1.1	12.8
02.06.2016 09:14:43	12.1	12.1	12.1	12.1	12.1	12.1	2538	0	0	12.1
02.06.2016 09:14:49	12.8	12.8	12.7	12.8	12.8	12.8	2544	0	0.1	12.7
02.06.2016 09:14:55	12.7	12.3	10.9	12.7	12.7	12.5	2550	0.4	1.4	10.9
02.06.2016 09:15:01	14.8	14.8	14.6	14.8	14.8	14.8	2556	0	0.2	14.6
02.06.2016 09:15:07	12.8	12.5	11.7	12.8	12.8	12.7	2562	0.3	0.8	11.7
02.06.2016 09:15:13	11.6	11.6	11.6	11.6	11.6	11.6	2568	0	0	11.6
02.06.2016 09:15:19	20.5	12.1	11.7	25.5	19.7	12.6	2574	8.4	0.4	11.7
02.06.2016 09:15:25	13.8	13	11.7	13.8	13.8	13.4	2580	0.8	1.3	11.7
02.06.2016 09:15:31	15.3	11.2	11.2	214.5	25.5	12.3	2586	4.1	0	11.2
02.06.2016 09:15:37	11	11	11	11	11	11	2592	0	0	11
02.06.2016 09:15:43	12.3	12.3	12.1	12.3	12.3	12.3	2598	0	0.2	12.1
02.06.2016 09:15:49	11.9	11.9	11.7	11.9	11.9	11.9	2604	0	0.2	11.7
02.06.2016 09:15:55	13.7	13.3	12.3	13.7	13.7	13.5	2610	0.4	1	12.3
02.06.2016 09:16:01	11.2	11.2	11.2	11.2	11.2	11.2	2616	0	0	11.2
02.06.2016 09:16:07	19.9	11.3	10.9	19.9	19	12.7	2622	8.6	0.4	10.9
02.06.2016 09:16:13	15.3	15.2	14.8	15.3	15.3	15.3	2628	0.1	0.4	14.8
02.06.2016 09:16:19	16.3	16	15.3	16.3	16.3	16.1	2634	0.3	0.7	15.3
02.06.2016 09:16:25	14.6	14.6	14.6	14.6	14.6	14.6	2640	0	0	14.6
02.06.2016 09:16:31	33	16.5	15.1	33.7	29.6	18	2646	16.5	1.4	15.1
02.06.2016 09:16:37	10.6	10.6	10.6	10.6	10.6	10.6	2652	0	0	10.6
02.06.2016 09:16:43	16.1	16	15.3	16.1	16.1	16.1	2658	0.1	0.7	15.3
02.06.2016 09:16:49	13	13	13	13	13	13	2664	0	0	13
02.06.2016 09:16:55	13.3	13.3	13.2	13.3	13.3	13.3	2670	0	0.1	13.2
02.06.2016 09:17:01	18.7	11.1	10.5	23.7	17.9	11.2	2676	7.6	0.6	10.5
02.06.2016 09:17:07	15	15	14.9	15	15	15	2682	0	0.1	14.9
02.06.2016 09:17:13	14.8	14.5	13.8	14.8	14.8	14.6	2688	0.3	0.7	13.8
02.06.2016 09:17:19	11.5	11.5	11.5	11.5	11.5	11.5	2694	0	0	11.5
02.06.2016 09:17:25	13.3	13.3	12.7	13.3	13.3	13.3	2700	0	0.6	12.7
02.06.2016 09:17:31	10.9	10.9	10.9	10.9	10.9	10.9	2706	0	0	10.9
02.06.2016 09:17:37	20.6	17.2	15.8	20.6	20.3	17.7	2712	3.4	1.4	15.8
02.06.2016 09:17:43	15.8	15.8	15.7	15.8	15.8	15.8	2718	0	0.1	15.7
02.06.2016 09:17:49	15.7	15	13.5	15.7	15.7	15.3	2724	0.7	1.5	13.5
02.06.2016 09:17:55	11	10.8	10.1	11	11	10.9	2730	0.2	0.7	10.1
02.06.2016 09:18:01	14.1	14.1	14.1	14.1	14.1	14.1	2736	0	0	14.1
02.06.2016 09:18:07	11.5	11.4	10.9	11.5	11.5	11.5	2742	0.1	0.5	10.9
02.06.2016 09:18:13	16.6	13.3	10.9	16.6	16.5	14.4	2748	3.3	2.4	10.9
02.06.2016 09:18:19	13.1	13.1	13.1	13.1	13.1	13.1	2754	0	0	13.1
02.06.2016 09:18:25	15.1	15.1	15	15.1	15.1	15.1	2760	0	0.1	15
02.06.2016 09:18:31	8.9	8.9	8.5	8.9	8.9	8.9	2766	0	0.4	8.5
02.06.2016 09:18:37	11.2	10.7	10	11.2	11.2	10.9	2772	0.5	0.7	10
02.06.2016 09:18:43	21.5	13.8	12.8	26.5	20.7	14	2778	7.7	1	12.8
02.06.2016 09:18:49	12.6	11.9	9.8	12.6	12.6	12.2	2784	0.7	2.1	9.8
02.06.2016 09:18:55	12	12	11.9	12	12	12	2790	0	0.1	11.9
02.06.2016 09:19:01	13.5	13.5	13.2	13.5	13.5	13.5	2796	0	0.3	13.2
02.06.2016 09:19:07	12.6	12.6	12.6	12.6	12.6	12.6	2802	0	0	12.6
02.06.2016 09:19:13	13.7	13.7	13.7	13.7	13.7	13.7	2808	0	0	13.7
02.06.2016 09:19:19	11.1	11.1	10.6	11.1	11.1	11.1	2814	0	0.5	10.6
02.06.2016 09:19:25	12.3	12.3	12.3	12.3	12.3	12.3	2820	0	0	12.3
02.06.2016 09:19:31	12.4	12.4	12.4	12.4	12.4	12.4	2826	0	0	12.4
02.06.2016 09:19:37	18.7	18.5	17.5	18.7	18.7	18.6	2832	0.2	1	17.5
02.06.2016 09:19:43	13.3	13.3	13.2	13.3	13.3	13.3	2838	0	0.1	13.2
02.06.2016 09:19:49	18.2	15.4	14	18.2	18.2	16.3	2844	2.8	1.4	14
02.06.2016 09:19:55	15.6	14.6	13.6	15.6	15.6	15.1	2850	1	1	13.6
02.06.2016 09:20:01	17.6	17.5	16.6	17.6	17.6	17.5	2856	0.1	0.9	16.6
02.06.2016 09:20:07	26.3	22	19.8	26.3	26.2	23.2	2862	4.3	2.2	19.8
02.06.2016 09:20:13	21.6	21.6	20.8	21.6	21.6	21.6	2868	0	0.8	20.8
02.06.2016 09:20:19	17.6	17.1	15.4	17.6	17.6	17.3	2874	0.5	1.7	15.4
02.06.2016 09:20:25	17.9	17.9	17.2	17.9	17.9	17.9	2880	0	0.7	17.2
02.06.2016 09:20:31	15.3	15	13.9	15.3	15.3	15.1	2886	0.3	1.1	13.9
02.06.2016 09:20:37	19.1	14.3	13.5	19.1	18.3	14.7	2892	4.8	0.8	13.5
02.06.2016 09:20:43	24.8	24.8	24.8	24.8	24.8	24.8	2898	0	0	24.8
02.06.2016 09:20:49	12.2	12.2	12	12.2	12.2	12.2	2904	0	0.2	12
02.06.2016 09:20:55	20.7	20.4	19.3	20.7	20.7	20.6	2910	0.3	1.1	19.3
02.06.2016 09:21:01	12.6	12.6	12.4	12.6	12.6	12.5	2916	0	0.2	12.4
02.06.2016 09:21:07	12.6	12.6	12.6	12.6	12.6	12.6	2922	0	0	12.6
02.06.2016 09:21:13	16.7	16.7	16.6	16.7	16.7	16.7	2928	0	0.1	16.6
02.06.2016 09:21:19	21.8	21.8	21.8	21.8	21.8	21.8	2934	0	0	21.8
02.06.2016 09:21:25	21.2	18	17.4	21.2	20.9	18.4	2940	3.2	0.6	17.4
02.06.2016 09:21:31	23.7	23.5	22.7	23.7	23.7	23.6	2946	0.2	0.8	22.7
02.06.2016 09:21:37	23.3	23.3	23.3	23.3	23.3	23.3	2952	0	0	23.3
02.06.2016 09:21:43	26.5	25.1	23.7	48.1	33.1	25.3	2958	1.4	1.4	23.7
02.06.2016 09:21:49	13	13	13	13	13	13	2964	0	0	13
02.06.2016 09:21:55	16.8	13.6	13	16.8	16.5	14	2970	3.2	0.6	13
02.06.2016 09:22:01	12.1	11.3	10.7	12.1	12.1	11.7	2976	0.8	0.6	10.7
02.06.2016 09:22:07	14.6	14.6	14.5	14.6	14.6	14.6	2982	0	0.1	14.5
02.06.2016 09:22:13	14.8	14.8	14.8	14.8	14.8	14.8	2988	0	0	14.8
02.06.2016 09:22:19	17.3	17.3	17.2	17.3	17.3	17.3	2994	0	0.1	17.2
02.06.2016 09:22:25	15.6	15.6	14.8	15.6	15.6	15.6	3000	0	0.8	14.8
02.06.2016 09:22:31	12.7	12.7	12.7	12.7	12.7	12.7	3006	0	0	12.7
02.06.2016 09:22:37	14	13.7	12.4	113.6	19.2	13.8	3012	0.3	1.3	12.4
02.06.2016 09:22:43	18.3	16.7	15.1	39.9	24.9	16.9	3018	1.6	1.6	15.1
02.06.2016 09:22:49	16.6	14.9	14.3	16.6	16.6	15.6	3024	1.7	0.6	14.3
02.06.2016 09:22:55	20.9	19.6	18.1	20.9	20.9	20.2	3030	1.3	1.5	18.1
02.06.2016 09:23:01	21.1	20.9	18.9	21.1	21.1	21	3036	0.2	2	18.9
02.06.2016 09:23:07	15.6	14.3	12.6	15.6	15.6	14.9	3042	1.3	1.7	12.6
02.06.2016 09:23:13	18.6	18.3	17.7	18.6	18.6	18.4	3048	0.3	0.6	17.7
02.06.2016 09:23:19	18.6	17	16.4	18.6	18.6	17.7	3054	1.6	0.6	16.4
02.06.2016 09:23:25	17.9	14.8	13.9	17.9	17.6	15.2	3060	3.1	0.9	13.9
02.06.2016 09:23:31	13.6	13.6	13.6	13.6	13.6	13.6	3066	0	0	13.6
02.06.2016 09:23:37	13.6	13.4	12.7	13.6	13.6	13.5	3072	0.2	0.7	12.7
02.06.2016 09:23:43	16.4	16.1	14.9	16.4	16.4	16.2	3078	0.3	1.2	14.9
02.06.2016 09:23:49	15.5	15.5	15.5	15.5	15.5	15.5	3084	0	0	15.5
02.06.2016 09:23:55	18.5	17.5	14.3	18.5	18.5	17.9	3090	1	3.2	14.3
02.06.2016 09:24:01	13.8	13.8	13.7	13.8	13.8	13.8	3096	0	0.1	13.7
02.06.2016 09:24:07	23.4	15.4	14.9	28.4	22.5	15.8	3102	8	0.5	14.9
02.06.2016 09:24:13	27.8	16.9	12.7	32.8	26.9	18.2	3108	10.9	4.2	12.7
02.06.2016 09:24:19	26.7	15.6	12.7	53.3	32.5	16.9	3114	11.1	2.9	12.7
02.06.2016 09:24:25	20.5	12.4	11.3	42.5	25.5	12.8	3120	8.1	1.1	11.3
02.06.2016 09:24:31	33.8	13.5	13.3	39.1	30.5	14.5	3126	20.3	0.2	13.3
02.06.2016 09:24:37	13	12.9	12.2	13	13	12.9	3132	0.1	0.7	12.2
02.06.2016 09:24:43	14.8	14.7	13.8	14.8	14.8	14.7	3138	0.1	0.9	13.8
02.06.2016 09:24:49	21.7	14.2	13.8	22	20.1	14.8	3144	7.5	0.4	13.8
02.06.2016 09:24:55	23.7	14.5	12.3	24.1	22	15.5	3150	9.2	2.2	12.3
02.06.2016 09:25:01	15.3	13.4	11.7	15.3	15.3	14.3	3156	1.9	1.7	11.7
02.06.2016 09:25:07	22.1	14	12.2	22.4	20.5	14.9	3162	8.1	1.8	12.2
02.06.2016 09:25:13	22.9	13.9	11.6	23.2	21.2	14.8	3168	9	2.3	11.6
02.06.2016 09:25:19	14.2	12.9	12.3	35.8	20.8	13	3174	1.3	0.6	12.3
02.06.2016 09:25:25	10.7	10.7	10.6	10.7	10.7	10.7	3180	0	0.1	10.6
02.06.2016 09:25:31	15.1	12.2	11.8	36.7	21.7	12.7	3186	2.9	0.4	11.8
02.06.2016 09:25:37	13.2	11.4	11	13.2	13.2	12.2	3192	1.8	0.4	11
02.06.2016 09:25:43	11.6	11.6	11.6	11.6	11.6	11.6	3198	0	0	11.6
02.06.2016 09:25:49	10.1	10.1	10.1	10.1	10.1	10.1	3204	0	0	10.1
02.06.2016 09:25:55	10.9	10.9	10.9	10.9	10.9	10.9	3210	0	0	10.9
02.06.2016 09:26:01	12.2	12.1	11.4	12.2	12.2	12.1	3216	0.1	0.7	11.4
02.06.2016 09:26:07	11.4	11.4	11	11.4	11.4	11.4	3222	0	0.4	11
02.06.2016 09:26:13	21.9	13.4	13.1	21.9	20.8	14.4	3228	8.5	0.3	13.1
02.06.2016 09:26:19	11.1	11.1	10.8	11.1	11.1	11.1	3234	0	0.3	10.8
02.06.2016 09:26:25	22.6	11.7	11.4	27.6	21.6	12.6	3240	10.9	0.3	11.4
02.06.2016 09:26:31	12.5	12.4	12	12.5	12.5	12.5	3246	0.1	0.4	12
02.06.2016 09:26:37	20.9	20.9	20.9	20.9	20.9	20.9	3252	0	0	20.9
02.06.2016 09:26:43	19.1	19.1	18.8	19.1	19.1	19	3258	0	0.3	18.8
02.06.2016 09:26:49	18.6	18.1	17.2	18.6	18.6	18.4	3264	0.5	0.9	17.2
02.06.2016 09:26:55	17.8	17.5	16.9	17.8	17.8	17.6	3270	0.3	0.6	16.9
02.06.2016 09:27:01	14.8	14.7	14.3	14.8	14.8	14.7	3276	0.1	0.4	14.3
02.06.2016 09:27:07	20.5	19.5	19	20.5	20.5	20	3282	1	0.5	19
02.06.2016 09:27:13	17.8	17.8	17.8	17.8	17.8	17.8	3288	0	0	17.8
02.06.2016 09:27:19	13.2	13.2	13.2	13.2	13.2	13.2	3294	0	0	13.2
02.06.2016 09:27:25	19.6	19.4	18.4	19.6	19.6	19.5	3300	0.2	1	18.4
02.06.2016 09:27:31	14.7	14	13.2	14.7	14.7	14.3	3306	0.7	0.8	13.2
02.06.2016 09:27:37	18.7	17.7	17.2	18.7	18.7	18.2	3312	1	0.5	17.2
02.06.2016 09:27:43	18.3	16.5	15.5	18.3	18.3	16.9	3318	1.8	1	15.5
02.06.2016 09:27:49	16.5	16.5	16.5	16.5	16.5	16.5	3324	0	0	16.5
02.06.2016 09:27:55	14.9	12.9	12.4	14.9	14.9	13.8	3330	2	0.5	12.4
02.06.2016 09:28:01	15.4	13.8	12.8	37	22.1	14.1	3336	1.6	1	12.8
02.06.2016 09:28:07	11.6	11.6	11.6	11.6	11.6	11.6	3342	0	0	11.6
02.06.2016 09:28:13	16.1	16.1	16.1	16.1	16.1	16.1	3348	0	0	16.1
02.06.2016 09:28:19	11.8	11.8	11.8	11.8	11.8	11.8	3354	0	0	11.8
02.06.2016 09:28:25	16.9	16.9	16.9	16.9	16.9	16.9	3360	0	0	16.9
02.06.2016 09:28:31	13.1	12.8	11.7	13.1	13.1	12.9	3366	0.3	1.1	11.7
02.06.2016 09:28:37	14	14	13.6	14	14	14	3372	0	0.4	13.6
02.06.2016 09:28:43	10.8	10.8	10.8	10.8	10.8	10.8	3378	0	0	10.8
02.06.2016 09:28:49	13.5	13.5	13.5	13.5	13.5	13.5	3384	0	0	13.5
02.06.2016 09:28:55	11.8	11.6	10.9	11.8	11.8	11.7	3390	0.2	0.7	10.9
02.06.2016 09:29:01	10.7	10.7	10.7	10.7	10.7	10.7	3396	0	0	10.7
02.06.2016 09:29:07	14.9	14.9	14.9	14.9	14.9	14.9	3402	0	0	14.9
02.06.2016 09:29:13	14.1	14.1	14.1	14.1	14.1	14.1	3408	0	0	14.1
02.06.2016 09:29:19	14.9	14.6	13.3	14.9	14.9	14.7	3414	0.3	1.3	13.3
02.06.2016 09:29:25	16.9	16.9	16.9	16.9	16.9	16.9	3420	0	0	16.9
02.06.2016 09:29:31	22.5	22.5	22	22.5	22.5	22.5	3426	0	0.5	22
02.06.2016 09:29:37	22.6	22.3	21.5	22.6	22.6	22.4	3432	0.3	0.8	21.5
02.06.2016 09:29:43	23.4	23	21.3	23.4	23.4	23.2	3438	0.4	1.7	21.3
02.06.2016 09:29:49	17.8	17.5	16.1	17.8	17.8	17.6	3444	0.3	1.4	16.1
02.06.2016 09:29:55	19.7	19.4	18.7	19.7	19.7	19.6	3450	0.3	0.7	18.7
02.06.2016 09:30:01	12.1	12.1	11.9	12.1	12.1	12.1	3456	0	0.2	11.9
02.06.2016 09:30:07	34.1	15.4	13.2	65.7	39	16.4	3462	18.7	2.2	13.2
02.06.2016 09:30:13	40.9	11.7	11.4	73.2	42.6	12.3	3468	29.2	0.3	11.4
02.06.2016 09:30:19	23.8	23.7	22.6	23.8	23.8	23.7	3474	0.1	1.1	22.6
02.06.2016 09:30:25	19.7	17.3	15.8	19.7	19.6	18	3480	2.4	1.5	15.8
02.06.2016 09:30:31	22.5	17.2	14.3	262	31.7	17.8	3486	5.3	2.9	14.3
02.06.2016 09:30:37	26.3	14.6	11.5	26.7	24.4	16.1	3492	11.7	3.1	11.5
02.06.2016 09:30:43	30.7	15.2	13.3	40.7	29	15.6	3498	15.5	1.9	13.3
02.06.2016 09:30:49	23.3	20	17	23.3	23.2	21.1	3504	3.3	3	17
02.06.2016 09:30:55	17	13.9	12.8	17	16.9	14.9	3510	3.1	1.1	12.8
02.06.2016 09:31:01	17.6	17.6	17.6	17.6	17.6	17.6	3516	0	0	17.6
02.06.2016 09:31:07	20.9	15.2	13.5	20.9	20.5	16.3	3522	5.7	1.7	13.5
02.06.2016 09:31:13	11.5	11.5	11.5	11.5	11.5	11.5	3528	0	0	11.5
02.06.2016 09:31:19	13.7	13.6	12.5	13.7	13.7	13.7	3534	0.1	1.1	12.5
02.06.2016 09:31:25	12.3	12.3	11.8	12.3	12.3	12.3	3540	0	0.5	11.8
02.06.2016 09:31:31	15.9	13.8	12.5	15.9	15.8	14.4	3546	2.1	1.3	12.5
02.06.2016 09:31:37	13.9	12.1	10.4	13.9	13.9	12.9	3552	1.8	1.7	10.4
02.06.2016 09:31:43	11.2	11.2	11.1	11.2	11.2	11.2	3558	0	0.1	11.1
02.06.2016 09:31:49	11.3	11.3	11.2	11.3	11.3	11.3	3564	0	0.1	11.2
02.06.2016 09:31:55	16.3	16.2	15.6	16.3	16.3	16.2	3570	0.1	0.6	15.6
02.06.2016 09:32:01	22.5	13.2	12.2	27.5	21.6	13.8	3576	9.3	1	12.2
02.06.2016 09:32:07	12.9	12.9	12.9	12.9	12.9	12.9	3582	0	0	12.9
02.06.2016 09:32:13	12	12	11.7	12	12	12	3588	0	0.3	11.7
02.06.2016 09:32:19	18.7	17.1	14.7	18.7	18.7	17.8	3594	1.6	2.4	14.7
02.06.2016 09:32:25	12.2	12.2	12.1	12.2	12.2	12.2	3600	0	0.1	12.1
02.06.2016 09:32:31	16	16	16	16	16	16	3606	0	0	16
02.06.2016 09:32:37	16.7	16.4	15.3	16.7	16.7	16.5	3612	0.3	1.1	15.3
02.06.2016 09:32:43	14.3	14.3	13.7	14.3	14.3	14.3	3618	0	0.6	13.7
02.06.2016 09:32:49	13.9	13.2	11.1	13.9	13.9	13.5	3624	0.7	2.1	11.1
02.06.2016 09:32:55	16.4	13.3	12.6	16.4	16.1	13.7	3630	3.1	0.7	12.6
02.06.2016 09:33:01	13.9	13.4	11.4	13.9	13.9	13.6	3636	0.5	2	11.4
02.06.2016 09:33:07	16.3	15.3	13.9	16.3	16.3	15.7	3642	1	1.4	13.9
02.06.2016 09:33:13	13.6	13.6	13.6	13.6	13.6	13.6	3648	0	0	13.6
02.06.2016 09:33:19	18	18	17.9	18	18	18	3654	0	0.1	17.9
02.06.2016 09:33:25	19.7	19.7	19.7	19.7	19.7	19.7	3660	0	0	19.7
02.06.2016 09:33:31	18.6	17.6	14.8	18.6	18.6	18	3666	1	2.8	14.8
02.06.2016 09:33:37	14.6	14.6	14.6	14.6	14.6	14.6	3672	0	0	14.6
02.06.2016 09:33:43	13.3	13	11.7	13.3	13.3	13.2	3678	0.3	1.3	11.7
02.06.2016 09:33:49	21.2	14.4	12.6	21.2	20.8	16.1	3684	6.8	1.8	12.6
02.06.2016 09:33:55	23.1	13.8	13.1	23.5	21.5	15.2	3690	9.3	0.7	13.1
02.06.2016 09:34:01	17.2	14.1	13.2	17.2	17.1	15.1	3696	3.1	0.9	13.2
02.06.2016 09:34:07	15.4	12.8	12.5	15.4	15.4	14	3702	2.6	0.3	12.5
02.06.2016 09:34:13	19.5	17.2	15.4	41.1	26.1	17.8	3708	2.3	1.8	15.4
02.06.2016 09:34:19	12.8	12.8	12.8	12.8	12.8	12.8	3714	0	0	12.8
02.06.2016 09:34:25	23.6	11.8	10.8	28.6	22.5	12.8	3720	11.8	1	10.8
02.06.2016 09:34:31	21.7	15.4	13.4	43.3	27.5	16	3726	6.3	2	13.4
02.06.2016 09:34:37	21.4	17.5	14.9	21.4	21.1	18.3	3732	3.9	2.6	14.9
02.06.2016 09:34:43	24.1	13.5	13	29.1	23	14	3738	10.6	0.5	13
02.06.2016 09:34:49	21.1	19.2	18.6	21.1	21	19.7	3744	1.9	0.6	18.6
02.06.2016 09:34:55	22.3	18.9	14.2	22.3	22.2	20	3750	3.4	4.7	14.2
02.06.2016 09:35:01	22.7	13.1	12.7	27.6	21.8	14.2	3756	9.6	0.4	12.7
02.06.2016 09:35:07	18.3	13.2	12.6	77.5	32.3	14.1	3762	5.1	0.6	12.6
02.06.2016 09:35:13	19.1	18.4	15.8	19.1	19.1	18.7	3768	0.7	2.6	15.8
02.06.2016 09:35:19	24.2	11.9	11.3	24.2	22.7	13.2	3774	12.3	0.6	11.3
02.06.2016 09:35:25	20.4	14.7	14.3	20.4	19.6	15.6	3780	5.7	0.4	14.3
02.06.2016 09:35:31	32.3	18	17	37.6	29.8	18.4	3786	14.3	1	17
02.06.2016 09:35:37	20.3	18	16.1	20.3	20.3	19.1	3792	2.3	1.9	16.1
02.06.2016 09:35:43	14.4	13.4	12.9	14.4	14.4	13.9	3798	1	0.5	12.9
02.06.2016 09:35:49	14.1	14.1	13.7	14.1	14.1	14.1	3804	0	0.4	13.7
02.06.2016 09:35:55	17.4	15.4	13.9	17.4	17.4	16.3	3810	2	1.5	13.9
02.06.2016 09:36:01	15.1	14.1	13.5	15.1	15	14.5	3816	1	0.6	13.5
02.06.2016 09:36:07	11.7	11.4	10.7	11.7	11.7	11.5	3822	0.3	0.7	10.7
02.06.2016 09:36:13	16.8	13.7	12.1	16.8	16.8	14.7	3828	3.1	1.6	12.1
02.06.2016 09:36:19	14.8	14.8	14.8	14.8	14.8	14.8	3834	0	0	14.8
02.06.2016 09:36:25	14.9	14.4	13.2	14.9	14.9	14.6	3840	0.5	1.2	13.2
02.06.2016 09:36:31	14.9	14.9	14.8	14.9	14.9	14.9	3846	0	0.1	14.8
02.06.2016 09:36:37	16.5	15.3	14.1	16.5	16.5	15.9	3852	1.2	1.2	14.1
02.06.2016 09:36:43	16.5	16.1	15.4	16.5	16.5	16.3	3858	0.4	0.7	15.4
02.06.2016 09:36:49	18.2	17.1	16.4	18.2	18.2	17.6	3864	1.1	0.7	16.4
02.06.2016 09:36:55	15.3	14	12.9	15.3	15.3	14.6	3870	1.3	1.1	12.9
02.06.2016 09:37:01	23.1	20.9	19.1	23.1	23.1	21.5	3876	2.2	1.8	19.1
02.06.2016 09:37:07	19.2	19.2	19.1	19.2	19.2	19.2	3882	0	0.1	19.1
02.06.2016 09:37:13	20.4	15.7	14.7	20.4	19.6	16.1	3888	4.7	1	14.7
02.06.2016 09:37:19	19.1	17.1	16.1	19.1	19	17.6	3894	2	1	16.1
02.06.2016 09:37:25	17	10.3	9.7	17.4	15.4	10.6	3900	6.7	0.6	9.7
02.06.2016 09:37:31	12.3	12.3	12.3	12.3	12.3	12.3	3906	0	0	12.3
02.06.2016 09:37:37	12.8	12.8	12.8	12.8	12.8	12.8	3912	0	0	12.8
02.06.2016 09:37:43	15.4	14.4	12.1	15.4	15.4	14.8	3918	1	2.3	12.1
02.06.2016 09:37:49	13.9	13.9	13.9	13.9	13.9	13.9	3924	0	0	13.9
02.06.2016 09:37:55	14.4	14.4	13.9	14.4	14.4	14.4	3930	0	0.5	13.9
02.06.2016 09:38:01	14.8	14.4	12.9	14.8	14.8	14.5	3936	0.4	1.5	12.9
02.06.2016 09:38:07	12.4	12.4	11.8	12.4	12.4	12.4	3942	0	0.6	11.8
02.06.2016 09:38:13	17.3	15.6	14.7	17.3	17.3	16.4	3948	1.7	0.9	14.7
02.06.2016 09:38:19	10.7	10.7	10.7	10.7	10.7	10.7	3954	0	0	10.7
02.06.2016 09:38:25	13	13	13	13	13	13	3960	0	0	13
02.06.2016 09:38:31	29.8	14	13.4	39.8	28.2	14.6	3966	15.8	0.6	13.4
02.06.2016 09:38:37	10.8	10.8	10.8	10.8	10.8	10.8	3972	0	0	10.8
02.06.2016 09:38:43	12.2	12.2	12.2	12.2	12.2	12.2	3978	0	0	12.2
02.06.2016 09:38:49	12	12	11.5	12	12	12	3984	0	0.5	11.5
02.06.2016 09:38:55	12.7	12.7	12.4	12.7	12.7	12.7	3990	0	0.3	12.4
02.06.2016 09:39:01	13.4	12.4	11.7	13.4	13.4	12.9	3996	1	0.7	11.7
02.06.2016 09:39:07	28.1	17.4	16.6	33	26.9	17.9	4002	10.7	0.8	16.6
02.06.2016 09:39:13	12.7	12.7	12.7	12.7	12.7	12.7	4008	0	0	12.7
02.06.2016 09:39:19	16.5	16.5	16.5	16.5	16.5	16.5	4014	0	0	16.5
02.06.2016 09:39:25	18.7	17.8	14.9	18.7	18.7	18.2	4020	0.9	2.9	14.9
02.06.2016 09:39:31	17.3	16.8	16.1	17.3	17.3	17	4026	0.5	0.7	16.1
02.06.2016 09:39:37	18.1	18.1	17.8	18.1	18.1	18.1	4032	0	0.3	17.8
02.06.2016 09:39:43	17	17	16.1	17	17	17	4038	0	0.9	16.1
02.06.2016 09:39:49	14.5	14.5	14.2	14.5	14.5	14.5	4044	0	0.3	14.2
02.06.2016 09:39:55	12.5	12.2	11.5	12.5	12.5	12.3	4050	0.3	0.7	11.5
02.06.2016 09:40:01	10.9	10.9	10.8	10.9	10.9	10.9	4056	0	0.1	10.8
02.06.2016 09:40:07	13	13	13	13	13	13	4062	0	0	13
02.06.2016 09:40:13	17	17	17	17	17	17	4068	0	0	17
02.06.2016 09:40:19	13.5	13.5	13.5	13.5	13.5	13.5	4074	0	0	13.5
02.06.2016 09:40:25	10.3	10.3	10.3	10.3	10.3	10.3	4080	0	0	10.3
02.06.2016 09:40:31	14.9	14.9	14.8	14.9	14.9	14.9	4086	0	0.1	14.8
02.06.2016 09:40:37	16.8	16.4	15	16.8	16.8	16.6	4092	0.4	1.4	15
02.06.2016 09:40:43	14.3	13.9	12.3	14.3	14.3	14.1	4098	0.4	1.6	12.3
02.06.2016 09:40:49	12.2	12.2	12.1	12.2	12.2	12.2	4104	0	0.1	12.1
02.06.2016 09:40:55	15.1	13.9	11.1	72.7	22	14.5	4110	1.2	2.8	11.1
02.06.2016 09:41:01	10.9	10.6	9.5	10.9	10.9	10.8	4116	0.3	1.1	9.5
02.06.2016 09:41:07	11.4	10	9.2	11.4	11.4	10.6	4122	1.4	0.8	9.2
02.06.2016 09:41:13	9.9	9.9	9.6	9.9	9.9	9.9	4128	0	0.3	9.6
02.06.2016 09:41:19	14.7	11.8	10.9	36.3	21.3	12.6	4134	2.9	0.9	10.9
02.06.2016 09:41:25	25.4	16.6	16.3	25.8	23.8	17.8	4140	8.8	0.3	16.3
02.06.2016 09:41:31	17.2	17.2	16.4	17.2	17.2	17.2	4146	0	0.8	16.4
02.06.2016 09:41:37	18.8	15	11.5	200.7	21.9	16.3	4152	3.8	3.5	11.5
02.06.2016 09:41:43	17.6	12.8	11.4	17.6	17.4	14.2	4158	4.8	1.4	11.4
02.06.2016 09:41:49	21.6	19.5	15.9	21.6	21.6	20.4	4164	2.1	3.6	15.9
02.06.2016 09:41:55	34.8	18.2	12	40.1	32.3	19.6	4170	16.6	6.2	12
02.06.2016 09:42:01	26.4	13.2	11.3	26.4	25.4	15.8	4176	13.2	1.9	11.3
02.06.2016 09:42:07	33.2	14.7	10.4	38.2	31.2	17	4182	18.5	4.3	10.4
02.06.2016 09:42:13	51.7	15.3	10.8	57.3	46.9	20	4188	36.4	4.5	10.8
02.06.2016 09:42:19	27.2	10.3	9.4	27.5	24.8	12.7	4194	16.9	0.9	9.4
02.06.2016 09:42:25	36.2	15.2	11.4	36.9	32.2	17.4	4200	21	3.8	11.4
02.06.2016 09:42:31	25.4	15	13.9	68.6	38.2	17.4	4206	10.4	1.1	13.9
02.06.2016 09:42:37	22.3	15.7	13.7	59.9	29.7	17.3	4212	6.6	2	13.7
02.06.2016 09:42:43	21.4	19.1	13.6	21.4	21.4	20.1	4218	2.3	5.5	13.6
02.06.2016 09:42:49	20.9	15.3	10.7	20.9	20.8	17.4	4224	5.6	4.6	10.7
02.06.2016 09:42:55	14.1	14	13.2	14.1	14.1	14.1	4230	0.1	0.8	13.2
02.06.2016 09:43:01	16.2	16.2	15.6	16.2	16.2	16.2	4236	0	0.6	15.6
02.06.2016 09:43:07	20.2	10.1	9.9	20.6	18.5	11.5	4242	10.1	0.2	9.9
02.06.2016 09:43:13	23.3	14.2	9.7	28.3	22.5	15.1	4248	9.1	4.5	9.7
02.06.2016 09:43:19	11.8	11.8	11.7	11.8	11.8	11.8	4254	0	0.1	11.7
02.06.2016 09:43:25	20.7	16.8	10.1	20.7	20.6	18.2	4260	3.9	6.7	10.1
02.06.2016 09:43:31	13.2	13.1	12.2	13.2	13.2	13.1	4266	0.1	0.9	12.2
02.06.2016 09:43:37	36.4	16	12.7	105.4	48.7	17.1	4272	20.4	3.3	12.7
02.06.2016 09:43:43	16	11.6	10.1	16	15.9	13.2	4278	4.4	1.5	10.1
02.06.2016 09:43:49	11.4	11.4	10.9	11.4	11.4	11.4	4284	0	0.5	10.9
02.06.2016 09:43:55	10.9	10.8	10.4	10.9	10.9	10.8	4290	0.1	0.4	10.4
02.06.2016 09:44:01	10.3	10.3	9.8	10.3	10.3	10.3	4296	0	0.5	9.8
02.06.2016 09:44:07	22.1	11.5	9.9	27.1	21.3	13	4302	10.6	1.6	9.9
02.06.2016 09:44:13	22.2	11	10.4	27.2	21	11.8	4308	11.2	0.6	10.4	0
02.06.2016 09:44:19	17.4	14.7	11.6	17.4	17.3	15.5	4314	2.7	3.1	11.6	6
02.06.2016 09:44:25	16	14.2	12.6	16	16	15.1	4320	1.8	1.6	12.6	12
02.06.2016 09:44:31	11.9	11.9	11.8	11.9	11.9	11.9	4326	0	0.1	11.8	18
02.06.2016 09:44:37	17	13.8	10.8	54.5	24.7	15.3	4332	3.2	3	10.8	24
02.06.2016 09:44:43	18.5	11.1	9.4	18.8	16.8	11.6	4338	7.4	1.7	9.4	30
02.06.2016 09:44:49	20.7	15.1	9.3	20.7	20.6	17.2	4344	5.6	5.8	9.3	36
02.06.2016 09:44:55	12.4	11.6	10	12.4	12.4	12	4350	0.8	1.6	10	42
02.06.2016 09:45:01	16.1	15.2	14.2	16.1	16.1	15.6	4356	0.9	1	14.2	48
02.06.2016 09:45:07	14.5	12.9	11.8	36.1	21.1	13.1	4362	1.6	1.1	11.8	54
02.06.2016 09:45:13	13.5	13.5	13.5	13.5	13.5	13.5	4368	0	0	13.5	60
02.06.2016 09:45:19	13.7	11	10.5	13.7	13.6	11.8	4374	2.7	0.5	10.5	66
02.06.2016 09:45:25	9.4	9.4	9.3	9.4	9.4	9.4	4380	0	0.1	9.3	72
02.06.2016 09:45:31	13.3	13.3	13.2	13.3	13.3	13.3	4386	0	0.1	13.2	78
02.06.2016 09:45:37	10	10	9.7	10	10	10	4392	0	0.3	9.7	84
02.06.2016 09:45:43	15.2	15.2	14.9	15.2	15.2	15.2	4398	0	0.3	14.9	90
02.06.2016 09:45:49	17.3	10.7	9.9	17.3	16.5	11.6	4404	6.6	0.8	9.9	96
02.06.2016 09:45:55	13.9	12.8	11.3	13.9	13.9	13.3	4410	1.1	1.5	11.3	102
02.06.2016 09:46:01	15.8	12.5	12.1	15.8	15.8	13.6	4416	3.3	0.4	12.1	108
02.06.2016 09:46:07	12	12	12	12	12	12	4422	0	0	12	114
02.06.2016 09:46:13	13.7	13.4	12.7	13.7	13.7	13.5	4428	0.3	0.7	12.7	120
02.06.2016 09:46:19	22.3	11.3	9.5	27.3	21.2	12	4434	11	1.8	9.5	126
02.06.2016 09:46:25	9.5	9.5	9.5	9.5	9.5	9.5	4440	0	0	9.5	132
02.06.2016 09:46:31	11	11	10.9	11	11	11	4446	0	0.1	10.9	138
02.06.2016 09:46:37	15.9	13	12	37.5	22.5	13.5	4452	2.9	1	12	144
02.06.2016 09:46:43	15.1	13.2	11.8	15.1	15.1	14.1	4458	1.9	1.4	11.8	150
02.06.2016 09:46:49	14.2	14.2	13.7	14.2	14.2	14.2	4464	0	0.5	13.7	156
02.06.2016 09:46:55	10.5	10.5	10.5	10.5	10.5	10.5	4470	0	0	10.5	162
02.06.2016 09:47:01	11	10.4	9	11	11	10.7	4476	0.6	1.4	9	168
02.06.2016 09:47:07	19.6	19.5	18.5	19.6	19.6	19.5	4482	0.1	1	18.5	174
02.06.2016 09:47:13	19.9	19.8	19.1	19.9	19.9	19.9	4488	0.1	0.7	19.1	180
02.06.2016 09:47:19	14.2	14.2	14	14.2	14.2	14.2	4494	0	0.2	14	186
02.06.2016 09:47:25	12.6	11.3	10.7	12.6	12.6	11.9	4500	1.3	0.6	10.7	192
02.06.2016 09:47:31	13	13	12.6	13	13	13	4506	0	0.4	12.6	198
02.06.2016 09:47:37	26.1	26.1	25.9	26.1	26.1	26.1	4512	0	0.2	25.9	204
02.06.2016 09:47:43	17.2	15.3	11.9	17.2	17.2	16.1	4518	1.9	3.4	11.9	210
02.06.2016 09:47:49	21.9	21.9	21.3	21.9	21.9	21.9	4524	0	0.6	21.3	216
02.06.2016 09:47:55	21.7	21.7	21.5	21.7	21.7	21.7	4530	0	0.2	21.5	222
02.06.2016 09:48:01	21.2	19.9	18.7	21.2	21.1	20.5	4536	1.3	1.2	18.7	228
02.06.2016 09:48:07	25.9	25.9	25.7	25.9	25.9	25.9	4542	0	0.2	25.7	234
02.06.2016 09:48:13	24.6	21.5	20	46.2	31.2	22.1	4548	3.1	1.5	20	240
02.06.2016 09:48:19	14.3	14.3	14.1	14.3	14.3	14.3	4554	0	0.2	14.1	246
02.06.2016 09:48:25	17.1	17.1	17	17.1	17.1	17.1	4560	0	0.1	17	252
02.06.2016 09:48:31	17.6	17.3	16.1	17.6	17.6	17.4	4566	0.3	1.2	16.1	258
02.06.2016 09:48:37	12.7	12.7	12.7	12.7	12.7	12.7	4572	0	0	12.7	264
02.06.2016 09:48:43	12.9	12.7	11.5	12.9	12.9	12.8	4578	0.2	1.2	11.5	270
02.06.2016 09:48:49	15.6	13.8	13.3	15.6	15.6	14.3	4584	1.8	0.5	13.3	276
02.06.2016 09:48:55	16.6	16.6	16	16.6	16.6	16.6	4590	0	0.6	16	282
02.06.2016 09:49:01	20.1	18.2	17.7	20.1	20	18.7	4596	1.9	0.5	17.7	288
02.06.2016 09:49:07	10.9	10.9	10.9	10.9	10.9	10.9	4602	0	0	10.9	294
02.06.2016 09:49:13	18.3	18.2	17.3	18.3	18.3	18.2	4608	0.1	0.9	17.3	300
02.06.2016 09:49:19	19.3	18.3	17.6	19.3	19.3	18.7	4614	1	0.7	17.6	306
02.06.2016 09:49:25	22.1	21.8	20.4	22.1	22.1	21.9	4620	0.3	1.4	20.4	312
02.06.2016 09:49:31	13.7	13.7	13.4	13.7	13.7	13.7	4626	0	0.3	13.4	318
02.06.2016 09:49:37	20.4	20.2	18.8	20.4	20.4	20.3	4632	0.2	1.4	18.8	324
02.06.2016 09:49:43	23.8	23.8	23.7	23.8	23.8	23.8	4638	0	0.1	23.7	330
02.06.2016 09:49:49	672.6	241.2	63.1	1603.1	697.6	321.1	4644	431.4	178.1	63.1	336
02.06.2016 09:49:55	357.6	90.4	29	1079	402.2	147.6	4650	267.2	61.4	29	342
02.06.2016 09:50:01	480.1	53.7	26.8	2287.3	550.8	115.5	4656	426.4	26.9	26.8	348
02.06.2016 09:50:07	258.2	51.5	19.5	1477.7	293.9	79.1	4662	206.7	32	19.5	354
02.06.2016 09:50:13	251.7	54.9	18.4	982	284.7	91.6	4668	196.8	36.5	18.4	360
02.06.2016 09:50:19	271.9	34.1	18.3	1080.6	297.7	69.4	4674	237.8	15.8	18.3	366
02.06.2016 09:50:25	227.8	52.9	21	1810.4	310	82.2	4680	174.9	31.9	21	372
02.06.2016 09:50:31	348.8	47.4	18.2	2073.1	464	88.3	4686	301.4	29.2	18.2	378
02.06.2016 09:50:37	154.8	30.8	16.1	1382.8	262.5	49.2	4692	124	14.7	16.1	384
02.06.2016 09:50:43	144.7	27.6	12.2	313	143.7	46.2	4698	117.1	15.4	12.2	390
02.06.2016 09:50:49	195.2	32.6	21.1	1350.4	268.1	53.7	4704	162.6	11.5	21.1	396
02.06.2016 09:50:55	182.4	32	17.8	1524.4	210	52.9	4710	150.4	14.2	17.8	402
02.06.2016 09:51:01	232.4	43.8	19.4	1039.9	322.5	62.9	4716	188.6	24.4	19.4	408
02.06.2016 09:51:07	268.5	28.5	17.3	1421.7	328.8	54.9	4722	240	11.2	17.3	414
02.06.2016 09:51:13	210.9	34.2	18.5	517.7	232	58	4728	176.7	15.7	18.5	420
02.06.2016 09:51:19	233.6	32.1	17.5	1247.5	335.2	54.9	4734	201.5	14.6	17.5	426
02.06.2016 09:51:25	215.8	36	17.2	955.1	239.1	57.9	4740	179.8	18.8	17.2	432
02.06.2016 09:51:31	182.9	28.7	17	789.3	234.1	46.3	4746	154.2	11.7	17	438
02.06.2016 09:51:37	192.1	26.6	17.2	1176.6	219.5	48.9	4752	165.5	9.4	17.2	444
02.06.2016 09:51:43	166.1	30.2	16.2	1836.9	286	47.2	4758	135.9	14	16.2	450
02.06.2016 09:51:49	154.4	22.7	14.8	544.6	191.1	37.1	4764	131.7	7.9	14.8	456
02.06.2016 09:51:55	175.9	34.7	14.7	549.3	209.1	53.2	4770	141.2	20	14.7	462
02.06.2016 09:52:01	127.9	33.1	14.5	391.6	149.2	47.7	4776	94.8	18.6	14.5	468
02.06.2016 09:52:07	172.8	20.7	12.7	564.7	207.5	38.3	4782	152.1	8	12.7	474
02.06.2016 09:52:13	135.1	46.7	17.9	516.8	187.2	61.8	4788	88.4	28.8	17.9	480
02.06.2016 09:52:19	135.6	24.8	12.9	452.5	161.6	36.7	4794	110.8	11.9	12.9	486
02.06.2016 09:52:25	143.9	20.8	12.7	866.4	194.1	31.7	4800	123.1	8.1	12.7	492
02.06.2016 09:52:31	172.9	27.2	14.9	773.8	211.6	43.8	4806	145.7	12.3	14.9	498
02.06.2016 09:52:37	192.5	19.4	14.1	1134.3	241.3	39.9	4812	173.1	5.3	14.1	504
02.06.2016 09:52:43	146.4	30.7	16	231.8	154.4	46.6	4818	115.7	14.7	16	510
02.06.2016 09:52:49	90.4	19.2	10.9	371.6	122.2	28.6	4824	71.2	8.3	10.9	516
02.06.2016 09:52:55	135.1	28.7	15.3	547.8	163.2	42.1	4830	106.4	13.4	15.3	522
02.06.2016 09:53:01	150.3	20	13.8	384.8	166.3	36.2	4836	130.3	6.2	13.8	528
02.06.2016 09:53:07	114.4	35.5	17.4	307.9	139.6	47.6	4842	78.9	18.1	17.4	534
02.06.2016 09:53:13	146.3	21.7	14.2	625.9	178.6	35.6	4848	124.6	7.5	14.2	540
02.06.2016 09:53:19	75.7	28.3	15.2	98	77.5	38.2	4854	47.4	13.1	15.2	546
02.06.2016 09:53:25	103.2	22.1	14.7	254.7	135	35.2	4860	81.1	7.4	14.7	552
02.06.2016 09:53:31	96.9	18	12.6	320.9	127.8	28.3	4866	78.9	5.4	12.6	558
02.06.2016 09:53:37	100.4	19.9	13.6	137.3	99.2	31.5	4872	80.5	6.3	13.6	564
02.06.2016 09:53:43	102.2	15.4	11	203.7	103.2	25.1	4878	86.8	4.4	11	570
02.06.2016 09:53:49	68.9	18.4	11.8	223.7	99.9	24.7	4884	50.5	6.6	11.8	576
02.06.2016 09:53:55	93	22	14.2	121	89.6	30.8	4890	71	7.8	14.2	582
02.06.2016 09:54:01	59.3	13.7	10.5	181.7	75	20.7	4896	45.6	3.2	10.5	588
02.06.2016 09:54:07	65.3	23	13.2	113.8	73.8	28.5	4902	42.3	9.8	13.2	594
02.06.2016 09:54:13	85.2	21	14.5	153.6	91.6	27.4	4908	64.2	6.5	14.5	600
02.06.2016 09:54:19	72.9	20.8	13.7	168.7	82.1	31	4914	52.1	7.1	13.7	606
02.06.2016 09:54:25	59	19	13.2	107.5	68.1	25.5	4920	40	5.8	13.2	612
02.06.2016 09:54:31	104.5	14	11.3	111.6	91.1	25.4	4926	90.5	2.7	11.3	618
02.06.2016 09:54:37	42.2	11.7	10.3	68.8	46.4	16.5	4932	30.5	1.4	10.3	624
02.06.2016 09:54:43	41.5	16.6	11.2	104.5	45.5	20.4	4938	24.9	5.4	11.2	630
02.06.2016 09:54:49	92.2	18.3	12.7	146	96.6	27.8	4944	73.9	5.6	12.7	636
02.06.2016 09:54:55	78	22.5	14.6	83.6	70.1	29.1	4950	55.5	7.9	14.6	642
02.06.2016 09:55:01	54.5	17.5	12.8	54.9	50.8	25.1	4956	37	4.7	12.8	648
02.06.2016 09:55:07	55.1	21.9	14.1	60.1	52.4	28.6	4962	33.2	7.8	14.1
02.06.2016 09:55:13	63.9	15.7	13.5	95.8	65.8	22	4968	48.2	2.2	13.5
02.06.2016 09:55:19	49.8	17	12.7	76.7	52.7	22.1	4974	32.8	4.3	12.7
02.06.2016 09:55:25	54.9	15.3	13.4	114.7	63.5	19.6	4980	39.6	1.9	13.4
02.06.2016 09:55:31	59.4	21.2	15.7	97.7	63	28.9	4986	38.2	5.5	15.7
02.06.2016 09:55:37	46.1	13.5	11.1	51.1	43.8	20.1	4992	32.6	2.4	11.1
02.06.2016 09:55:43	54.4	12.3	11.1	82.1	54.7	16.4	4998	42.1	1.2	11.1
02.06.2016 09:55:49	29.4	15.5	9.7	92	35.3	18.1	5004	13.9	5.8	9.7
02.06.2016 09:55:55	37	13.4	11.8	42	34.5	16.9	5010	23.6	1.6	11.8
02.06.2016 09:56:01	60.9	19	13.8	62.3	54.1	25.3	5016	41.9	5.2	13.8
02.06.2016 09:56:07	42.4	14.9	10.9	64.3	45.9	19.4	5022	27.5	4	10.9
02.06.2016 09:56:13	36.6	18.5	15.2	63.2	41.9	21.2	5028	18.1	3.3	15.2
02.06.2016 09:56:19	95.2	25.5	18.3	149	100.5	34.6	5034	69.7	7.2	18.3
02.06.2016 09:56:25	57.8	19.5	15.2	79.8	59.3	24.5	5040	38.3	4.3	15.2
02.06.2016 09:56:31	65.9	21	13	88.8	64.7	26.5	5046	44.9	8	13
02.06.2016 09:56:37	46.1	17	14.2	51.5	43.1	21.6	5052	29.1	2.8	14.2
02.06.2016 09:56:43	47.5	18.5	14.7	52.5	45	23.1	5058	29	3.8	14.7
02.06.2016 09:56:49	57.1	15.2	12.9	62.8	51.5	20.6	5064	41.9	2.3	12.9
02.06.2016 09:56:55	44	15.8	14.8	321.4	58.4	20.5	5070	28.2	1	14.8
02.06.2016 09:57:01	62.2	13.7	12.2	249.3	59.7	20	5076	48.5	1.5	12.2
02.06.2016 09:57:07	55.5	14.7	11.6	61.5	49.4	19.6	5082	40.8	3.1	11.6
02.06.2016 09:57:13	49	17.8	12.8	54	46.4	22.9	5088	31.2	5	12.8
02.06.2016 09:57:19	30.5	16.5	13.4	30.5	29.8	20.2	5094	14	3.1	13.4
02.06.2016 09:57:25	44.4	17.9	13.5	49.4	42.9	23.7	5100	26.5	4.4	13.5
02.06.2016 09:57:31	52.7	19.6	14.4	53.4	48.2	25.4	5106	33.1	5.2	14.4
02.06.2016 09:57:37	35.6	17.6	13.4	36	32.8	19.8	5112	18	4.2	13.4
02.06.2016 09:57:43	34.2	11.5	10.5	39.2	31.8	14.3	5118	22.7	1	10.5
02.06.2016 09:57:49	45.2	14.5	13	45.9	41	19.3	5124	30.7	1.5	13
02.06.2016 09:57:55	14.3	14.3	13.8	14.3	14.3	14.3	5130	0	0.5	13.8
02.06.2016 09:58:01	47.5	20.8	15.5	52.5	45	25.7	5136	26.7	5.3	15.5
02.06.2016 09:58:07	24.2	15.7	14.9	24.2	23.3	17.4	5142	8.5	0.8	14.9
02.06.2016 09:58:13	26.3	16.1	12.7	26.6	24.6	17.6	5148	10.2	3.4	12.7
02.06.2016 09:58:19	27	15.3	13.5	48.6	32.4	17	5154	11.7	1.8	13.5
02.06.2016 09:58:25	31.5	14.2	13.3	31.8	28.8	15.8	5160	17.3	0.9	13.3
02.06.2016 09:58:31	31.2	20.6	15.9	31.2	30.9	24.2	5166	10.6	4.7	15.9
02.06.2016 09:58:37	32.8	14.9	13.9	32.8	31.2	18.4	5172	17.9	1	13.9
02.06.2016 09:58:43	27.4	14.5	14.2	27.7	25.3	16.1	5178	12.9	0.3	14.2
02.06.2016 09:58:49	29.8	19	16.1	29.8	28.9	21.4	5184	10.8	2.9	16.1
02.06.2016 09:58:55	22.7	15.1	13.5	226.2	32.3	17.3	5190	7.6	1.6	13.5
02.06.2016 09:59:01	47.5	19.7	16.8	137	56.9	20.7	5196	27.8	2.9	16.8
02.06.2016 09:59:07	40.1	15.7	14	45.4	37.3	18.8	5202	24.4	1.7	14
02.06.2016 09:59:13	29.2	15	13.7	29.5	27.4	17.9	5208	14.2	1.3	13.7
02.06.2016 09:59:19	31.6	14.5	13.2	31.9	28.8	16.6	5214	17.1	1.3	13.2
02.06.2016 09:59:25	27.9	18.7	15.8	49.5	34.1	21	5220	9.2	2.9	15.8
02.06.2016 09:59:31	22.3	11.6	11.4	121.9	26.4	13	5226	10.7	0.2	11.4
02.06.2016 09:59:37	24.4	13.2	11.1	29.4	23.5	14.3	5232	11.2	2.1	11.1
02.06.2016 09:59:43	24.8	13.6	12.5	24.8	24.1	16.2	5238	11.2	1.1	12.5
02.06.2016 09:59:49	12.2	12.2	12.1	12.2	12.2	12.2	5244	0	0.1	12.1
02.06.2016 09:59:55	22.6	14	12.4	22.6	22.1	15.8	5250	8.6	1.6	12.4
02.06.2016 10:00:01	22.4	17.6	15.2	60	30	19.4	5256	4.8	2.4	15.2
02.06.2016 10:00:07	13.5	13.5	13.4	13.5	13.5	13.5	5262	0	0.1	13.4
02.06.2016 10:00:13	19.5	17.5	13.5	19.5	19.5	18.4	5268	2	4	13.5
02.06.2016 10:00:19	27	17.9	13.9	27	26.1	19.8	5274	9.1	4	13.9
02.06.2016 10:00:25	21.8	13.4	13.3	21.8	21.1	15.1	5280	8.4	0.1	13.3
02.06.2016 10:00:31	21.5	12.7	11.4	43.1	27.6	14.4	5286	8.8	1.3	11.4
02.06.2016 10:00:37	20.3	16.3	13.9	20.3	20.2	17.7	5292	4	2.4	13.9
02.06.2016 10:00:43	14.3	14.2	13.6	14.3	14.3	14.3	5298	0.1	0.6	13.6
02.06.2016 10:00:49	21.5	12.7	11.5	64.7	34.3	14.3	5304	8.8	1.2	11.5
02.06.2016 10:00:55	24.3	19.4	17.5	24.3	24.3	21.2	5310	4.9	1.9	17.5
02.06.2016 10:01:01	36.6	15	12.9	297.7	34.9	17.4	5316	21.6	2.1	12.9
02.06.2016 10:01:07	19.7	15.9	14.8	19.7	19.6	17.3	5322	3.8	1.1	14.8
02.06.2016 10:01:13	25.8	13.6	13	25.8	24.7	15.9	5328	12.2	0.6	13
02.06.2016 10:01:19	20	15.5	14.4	20	19.9	16.8	5334	4.5	1.1	14.4
02.06.2016 10:01:25	25.5	16	15	25.5	24.5	17.2	5340	9.5	1	15
02.06.2016 10:01:31	18.1	18	16.1	18.1	18.1	18	5346	0.1	1.9	16.1
02.06.2016 10:01:37	23.5	13.3	12.7	128.1	27.8	14.3	5352	10.2	0.6	12.7
02.06.2016 10:01:43	33.6	14.2	12.4	38.6	31.8	16.6	5358	19.4	1.8	12.4
02.06.2016 10:01:49	19.3	15.4	13.4	56.8	26.9	16.8	5364	3.9	2	13.4
02.06.2016 10:01:55	26.5	16.4	14.3	26.5	26	19.2	5370	10.1	2.1	14.3
02.06.2016 10:02:01	15.9	15.9	15.9	15.9	15.9	15.9	5376	0	0	15.9
02.06.2016 10:02:07	29.2	17.5	13	34.2	28.3	19.2	5382	11.7	4.5	13
02.06.2016 10:02:13	17.4	14.9	12.5	17.4	17.4	16	5388	2.5	2.4	12.5
02.06.2016 10:02:19	14.4	13	11.1	14.4	14.4	13.6	5394	1.4	1.9	11.1
02.06.2016 10:02:25	19.6	12.6	10.9	19.6	19.3	14.8	5400	7	1.7	10.9
02.06.2016 10:02:31	29.6	13	11.3	34.5	27.6	14.4	5406	16.6	1.7	11.3
02.06.2016 10:02:37	16	12.3	11.3	16	15.9	13.9	5412	3.7	1	11.3
02.06.2016 10:02:43	16.9	14.4	12.6	16.9	16.9	15.5	5418	2.5	1.8	12.6
02.06.2016 10:02:49	27.9	15.3	13.8	32.9	26.3	16	5424	12.6	1.5	13.8
02.06.2016 10:02:55	12.5	12.5	11.8	12.5	12.5	12.5	5430	0	0.7	11.8
02.06.2016 10:03:01	14	13.9	12.8	14	14	14	5436	0.1	1.1	12.8
02.06.2016 10:03:07	26.8	16.6	14.4	27.2	25.1	18.1	5442	10.2	2.2	14.4
02.06.2016 10:03:13	20.4	18	16.7	20.4	20.4	18.7	5448	2.4	1.3	16.7
02.06.2016 10:03:19	14.8	13.9	13.2	14.8	14.8	14.3	5454	0.9	0.7	13.2
02.06.2016 10:03:25	33.1	16	15.3	60.1	37.3	17.2	5460	17.1	0.7	15.3
02.06.2016 10:03:31	14.5	14.5	14.5	14.5	14.5	14.5	5466	0	0	14.5
02.06.2016 10:03:37	25.6	21.2	17.6	63.1	33.2	22.8	5472	4.4	3.6	17.6
02.06.2016 10:03:43	18.6	16.5	14.5	18.6	18.5	17.1	5478	2.1	2	14.5
02.06.2016 10:03:49	16.7	16	14	16.7	16.7	16.3	5484	0.7	2	14
02.06.2016 10:03:55	38.8	19.7	16.2	48.8	37.1	21.4	5490	19.1	3.5	16.2
02.06.2016 10:04:01	17.7	16.9	15.3	17.7	17.7	17.3	5496	0.8	1.6	15.3
02.06.2016 10:04:07	22.2	13.6	12.4	22.5	20.5	14.3	5502	8.6	1.2	12.4
02.06.2016 10:04:13	17.9	16.8	12.9	17.9	17.9	17.2	5508	1.1	3.9	12.9
02.06.2016 10:04:19	13	13	12.5	13	13	13	5514	0	0.5	12.5
02.06.2016 10:04:25	14.8	12	11.4	36.4	21.4	12.8	5520	2.8	0.6	11.4
02.06.2016 10:04:31	22.3	13.2	12.2	43.9	28	14.6	5526	9.1	1	12.2
02.06.2016 10:04:37	10.9	10.8	10.3	10.9	10.9	10.8	5532	0.1	0.5	10.3
02.06.2016 10:04:43	17.4	14.8	14.4	17.4	17.3	15.6	5538	2.6	0.4	14.4
02.06.2016 10:04:49	16	14.2	11.8	16	16	15	5544	1.8	2.4	11.8
02.06.2016 10:04:55	14.3	10.8	10.4	14.3	14.1	11.6	5550	3.5	0.4	10.4
02.06.2016 10:05:01	13.9	13.9	13.4	13.9	13.9	13.9	5556	0	0.5	13.4
02.06.2016 10:05:07	27.8	10.9	9.9	28.5	24.2	12	5562	16.9	1	9.9
02.06.2016 10:05:13	10	10	10	10	10	10	5568	0	0	10
02.06.2016 10:05:19	12	11.3	9.7	12	12	11.6	5574	0.7	1.6	9.7

## Sheet: 7OS
date & time	PM10 [ug/m3]	PM2,5 [ug/m3]	PM1 [ug/m3]	Inhalable [ug/m3]	Thoracic [ug/m3]	Alveolic [ug/m3]	Zeit in sek	2.5 bis 10	1 bis 2.5	kleiner 1
02.06.2016 11:58:16	37.3	27.2	21.4	37.7	35.6	28.6	6	10.1	5.8	21.4		Sägedauer	78			Temperature [°C]	Humidity [%rH]
02.06.2016 11:58:22	36.7	28.3	21.8	36.7	35.9	30.3	12	8.4	6.5	21.8						25.63	49.68
02.06.2016 11:58:28	23.5	23.4	22.1	23.5	23.5	23.4	18	0.1	1.3	22.1						25.63	49.36
02.06.2016 11:58:34	23.1	20.8	18.3	23.1	23.1	21.8	24	2.3	2.5	18.3						25.34	49.89
02.06.2016 11:58:40	22.1	20.3	18.6	22.1	22.1	21.1	30	1.8	1.7	18.6						25.05	51.24
02.06.2016 11:58:46	33.2	21.5	18.4	38.2	32.3	23.1	36	11.7	3.1	18.4						24.76	52.5
02.06.2016 11:58:52	20.4	20.3	18.8	20.4	20.4	20.3	42	0.1	1.5	18.8						24.57	53.23
02.06.2016 11:58:58	29.2	24.3	19.6	29.2	29.1	25.8	48	4.9	4.7	19.6						24.38	54.58
02.06.2016 11:59:04	27.7	25.1	20.6	27.7	27.7	26.3	54	2.6	4.5	20.6						24.19	55.63
02.06.2016 11:59:10	26.5	19.7	17.1	26.5	25.7	21	60	6.8	2.6	17.1						24	56.25
02.06.2016 11:59:16	21.6	19.3	16.9	21.6	21.5	20.3	66	2.3	2.4	16.9						23.9	56.99
02.06.2016 11:59:22	32.9	23.1	19.8	37.8	32	24.2	72	9.8	3.3	19.8						23.81	57.19
02.06.2016 11:59:28	34.3	24.7	18.9	39.2	33.4	25.8	78	9.6	5.8	18.9						23.71	57.51
02.06.2016 11:59:34	36.5	24.6	19.9	36.8	34.5	26.1	84	11.9	4.7	19.9						23.61	58.13
02.06.2016 11:59:40	31.6	23.6	19.9	74.1	38.5	23.9	90	8	3.7	19.9						23.52	58.24
02.06.2016 11:59:46	49.4	28.5	21.1	76	54.5	32.1	96	20.9	7.4	21.1						23.52	58.76
02.06.2016 11:59:52	32.1	25.1	21.5	32.1	31.3	26.5	102	7	3.6	21.5						23.52	58.86
02.06.2016 11:59:58	35.9	25.3	18	35.9	35.8	30	108	10.6	7.3	18						23.52	58.45
02.06.2016 12:00:04	53	23.9	20.3	257.2	58.3	27.9	114	29.1	3.6	20.3						23.42	57.92
02.06.2016 12:00:10	50.5	26.5	19.9	50.5	48.1	31	120	24	6.6	19.9						23.42	57.82
02.06.2016 12:00:16	19.6	15.6	14.7	19.6	19.5	17.3	126	4	0.9	14.7						23.42	57.4
02.06.2016 12:00:22	30.5	21.9	17.3	30.8	28.8	22.9	132	8.6	4.6	17.3						23.42	55.84
02.06.2016 12:00:28	27.6	22.8	18.5	27.6	27.2	23.9	138	4.8	4.3	18.5						23.42	54.58
02.06.2016 12:00:34	27	20.3	17.4	27	26.6	21.9	144	6.7	2.9	17.4						23.33	54.27
02.06.2016 12:00:40	32.7	21.1	18.6	90.7	37.6	22.2	150	11.6	2.5	18.6						23.42	55.11
02.06.2016 12:00:46	33.1	22.8	19.4	55.1	38.1	24.2	156	10.3	3.4	19.4						23.33	55.73
02.06.2016 12:00:52	34.1	22.1	20.1	60.6	39.8	23.4	162	12	2	20.1						23.33	56.25
02.06.2016 12:00:58	28.2	24.7	16.7	28.2	28.2	26.2	168	3.5	8	16.7						23.33	56.78
02.06.2016 12:01:04	29	23.5	18.6	29	28.7	24.9	174	5.5	4.9	18.6						23.33	57.61
02.06.2016 12:01:10	36.7	25.7	20.4	36.7	35.1	27.1	180	11	5.3	20.4						23.42	57.82
02.06.2016 12:01:16	35.2	24.5	17.3	156.7	45.3	26	186	10.7	7.2	17.3						23.42	58.76
02.06.2016 12:01:22	22.1	21.6	17.1	22.1	22.1	21.8	192	0.5	4.5	17.1						23.61	58.76
02.06.2016 12:01:28	34.6	30.3	20.6	34.6	34.5	32.2	198	4.3	9.7	20.6						23.81	56.99
02.06.2016 12:01:34	31.9	30.5	21.8	89.5	38.8	31.1	204	1.4	8.7	21.8						23.9	57.4
02.06.2016 12:01:40	29.3	22.6	16.9	29.3	28.5	23.9	210	6.7	5.7	16.9						24.09	58.24
02.06.2016 12:01:46	25.4	23.8	13.5	25.4	25.4	24.4	216	1.6	10.3	13.5						24.29	56.15
02.06.2016 12:01:52	27.8	26.5	19.1	27.8	27.8	27	222	1.3	7.4	19.1						24.38	55.21
02.06.2016 12:01:58	29.8	20.6	15.8	34.8	28.9	21.4	228	9.2	4.8	15.8
02.06.2016 12:02:04	25.3	20.1	15.8	207.1	28.1	21.4	234	5.2	4.3	15.8
02.06.2016 12:02:10	29.1	22.5	15.2	29.1	28.3	23.7	240	6.6	7.3	15.2
02.06.2016 12:02:16	26.4	24	15.4	26.4	26.4	25	246	2.4	8.6	15.4
02.06.2016 12:02:22	20.2	18.6	15	119.8	25.3	19.3	252	1.6	3.6	15
02.06.2016 12:02:28	20.1	19.7	16.3	20.1	20.1	19.9	258	0.4	3.4	16.3
02.06.2016 12:02:34	25.8	22.9	16	25.8	25.8	24.1	264	2.9	6.9	16
02.06.2016 12:02:40	24.6	19.3	15.7	24.6	24.2	20.6	270	5.3	3.6	15.7
02.06.2016 12:02:46	25.1	22.6	17.9	124.7	30.2	23.3	276	2.5	4.7	17.9
02.06.2016 12:02:52	17.1	16.9	13	17.1	17.1	17	282	0.2	3.9	13
02.06.2016 12:02:58	14.8	13.6	11.6	14.8	14.8	14.2	288	1.2	2	11.6
02.06.2016 12:03:04	14.2	14	11	14.2	14.2	14.1	294	0.2	3	11
02.06.2016 12:03:10	35.6	15.6	12.3	36.3	32	17.7	300	20	3.3	12.3
02.06.2016 12:03:16	25.3	17.7	13.2	25.6	23.7	18.3	306	7.6	4.5	13.2
02.06.2016 12:03:22	18.3	17	13.2	18.3	18.3	17.5	312	1.3	3.8	13.2
02.06.2016 12:03:28	29.4	18.2	14.2	155.6	40.3	19.1	318	11.2	4	14.2
02.06.2016 12:03:34	19.3	19	14.8	19.3	19.3	19.1	324	0.3	4.2	14.8
02.06.2016 12:03:40	21.4	18.2	13.3	21.4	21.3	19.6	330	3.2	4.9	13.3
02.06.2016 12:03:46	31.4	20.6	15.8	36.4	30.5	21.8	336	10.8	4.8	15.8
02.06.2016 12:03:52	30.9	21.2	14.8	35.8	30	22.2	342	9.7	6.4	14.8
02.06.2016 12:03:58	16.1	16	14.2	16.1	16.1	16	348	0.1	1.8	14.2
02.06.2016 12:04:04	27.6	24.2	16.9	27.6	27.6	25.7	354	3.4	7.3	16.9
02.06.2016 12:04:10	23.3	20.3	16.6	23.3	23.2	21.2	360	3	3.7	16.6
02.06.2016 12:04:16	28.7	22.5	14.7	28.7	27.9	23.5	366	6.2	7.8	14.7
02.06.2016 12:04:22	17.2	17.1	14.7	17.2	17.2	17.2	372	0.1	2.4	14.7
02.06.2016 12:04:28	26	22.4	17	26	25.9	23.6	378	3.6	5.4	17
02.06.2016 12:04:34	32.7	17	13.5	37.7	30.8	18.1	384	15.7	3.5	13.5
02.06.2016 12:04:40	19.8	17.7	14.3	41.4	26.4	18.1	390	2.1	3.4	14.3
02.06.2016 12:04:46	24.3	19.4	15.6	24.3	23.5	19.8	396	4.9	3.8	15.6
02.06.2016 12:04:52	18.8	18.7	15.9	18.8	18.8	18.7	402	0.1	2.8	15.9
02.06.2016 12:04:58	22.5	20.6	15.2	22.5	22.5	21.4	408	1.9	5.4	15.2
02.06.2016 12:05:04	33.6	19.5	14.9	38.6	32	20.4	414	14.1	4.6	14.9
02.06.2016 12:05:10	20.6	19.9	15.5	20.6	20.6	20.2	420	0.7	4.4	15.5
02.06.2016 12:05:16	22.7	20.2	15.2	22.7	22.7	21.3	426	2.5	5	15.2
02.06.2016 12:05:22	20.3	19.3	16.2	20.3	20.3	19.7	432	1	3.1	16.2
02.06.2016 12:05:28	22.1	20.9	15.3	22.1	22.1	21.4	438	1.2	5.6	15.3
02.06.2016 12:05:34	18	17.9	16	18	18	17.9	444	0.1	1.9	16
02.06.2016 12:05:40	18.1	16.6	14.7	18.1	18.1	17.3	450	1.5	1.9	14.7
02.06.2016 12:05:46	35.4	22.2	15.5	40.3	34.2	23.8	456	13.2	6.7	15.5
02.06.2016 12:05:52	26.1	20.6	16.7	47.7	32.7	22.6	462	5.5	3.9	16.7
02.06.2016 12:05:58	16.9	16.6	13.9	16.9	16.9	16.7	468	0.3	2.7	13.9
02.06.2016 12:06:04	18.2	16.7	12.7	18.2	18.2	17.4	474	1.5	4	12.7
02.06.2016 12:06:10	17.2	16.8	14.4	17.2	17.2	17	480	0.4	2.4	14.4
02.06.2016 12:06:16	22.3	18.8	14.4	22.3	22.2	20	486	3.5	4.4	14.4
02.06.2016 12:06:22	18	16.5	13	18	18	17.2	492	1.5	3.5	13
02.06.2016 12:06:28	24.4	16.4	13.4	29.4	23.6	16.7	498	8	3	13.4
02.06.2016 12:06:34	14.8	14.8	13.1	14.8	14.8	14.8	504	0	1.7	13.1
02.06.2016 12:06:40	18.6	17.3	13.6	18.6	18.6	17.9	510	1.3	3.7	13.6
02.06.2016 12:06:46	25.7	16.6	14.2	26.1	24	17.6	516	9.1	2.4	14.2
02.06.2016 12:06:52	21	16.8	15.7	21	20.7	17.7	522	4.2	1.1	15.7
02.06.2016 12:06:58	18.5	15.8	14.7	18.5	18.5	17	528	2.7	1.1	14.7
02.06.2016 12:07:04	14.5	14.5	13.9	14.5	14.5	14.5	534	0	0.6	13.9
02.06.2016 12:07:10	29.3	19.9	15.8	29.6	27.6	21.3	540	9.4	4.1	15.8
02.06.2016 12:07:16	18.7	17.4	15.1	18.7	18.7	18	546	1.3	2.3	15.1
02.06.2016 12:07:22	20.8	18.1	16.1	20.8	20.8	19.3	552	2.7	2	16.1
02.06.2016 12:07:28	21.4	17.7	15.8	21.4	21.3	18.9	558	3.7	1.9	15.8
02.06.2016 12:07:34	16.8	16.5	14.9	16.8	16.8	16.6	564	0.3	1.6	14.9
02.06.2016 12:07:40	19.5	18	14.6	19.5	19.5	18.7	570	1.5	3.4	14.6
02.06.2016 12:07:46	26.8	17.4	15.7	27.1	25.1	18.5	576	9.4	1.7	15.7
02.06.2016 12:07:52	19.3	15	13.8	19.3	19.2	16.2	582	4.3	1.2	13.8
02.06.2016 12:07:58	19.8	16.6	14.9	19.8	19.5	17	588	3.2	1.7	14.9
02.06.2016 12:08:04	21.8	20	16.3	121.4	27	20.8	594	1.8	3.7	16.3
02.06.2016 12:08:10	20.5	17.6	16.1	20.5	20.4	18.5	600	2.9	1.5	16.1
02.06.2016 12:08:16	21.1	19.6	16.1	21.1	21.1	20.3	606	1.5	3.5	16.1
02.06.2016 12:08:22	22.2	19.3	15.9	22.2	22.2	20.6	612	2.9	3.4	15.9
02.06.2016 12:08:28	19.9	18.4	16	19.9	19.8	19.1	618	1.5	2.4	16
02.06.2016 12:08:34	21	20.4	17.5	21	21	20.6	624	0.6	2.9	17.5
02.06.2016 12:08:40	25.5	22.3	17.8	25.5	25.4	23.4	630	3.2	4.5	17.8
02.06.2016 12:08:46	22	18.5	17	22	21.8	19.3	636	3.5	1.5	17
02.06.2016 12:08:52	19.9	18.6	16.8	19.9	19.9	19.2	642	1.3	1.8	16.8
02.06.2016 12:08:58	24.3	20.6	17.4	24.3	24.1	21.5	648	3.7	3.2	17.4
02.06.2016 12:09:04	22.7	21.3	18.4	22.7	22.7	21.9	654	1.4	2.9	18.4
02.06.2016 12:09:10	28.9	21	18.5	33.9	28	21.3	660	7.9	2.5	18.5
02.06.2016 12:09:16	31.7	19.7	17.7	32.1	30	21.6	666	12	2	17.7
02.06.2016 12:09:22	23	21.5	17.2	23	23	22.2	672	1.5	4.3	17.2
02.06.2016 12:09:28	18	18	17.7	18	18	18	678	0	0.3	17.7
02.06.2016 12:09:34	17.8	16.8	15.8	17.8	17.8	17.2	684	1	1	15.8
02.06.2016 12:09:40	21.7	16	15.3	43.3	27.5	16.3	690	5.7	0.7	15.3	0
02.06.2016 12:09:46	15	14	12.5	15	15	14.4	696	1	1.5	12.5	6
02.06.2016 12:09:52	11	11	10.5	11	11	11	702	0	0.5	10.5	12
02.06.2016 12:09:58	17.3	15	12.8	17.3	17.2	15.7	708	2.3	2.2	12.8	18
02.06.2016 12:10:04	32.7	12.2	11.2	64.3	37.5	13.7	714	20.5	1	11.2	24
02.06.2016 12:10:10	19.8	14.8	12.7	19.8	19.5	16	720	5	2.1	12.7	30
02.06.2016 12:10:16	43	19.7	14.2	44	38.1	21.9	726	23.3	5.5	14.2	36
02.06.2016 12:10:22	20.3	19.6	17.5	20.3	20.3	19.9	732	0.7	2.1	17.5	42
02.06.2016 12:10:28	16.1	15.5	13.1	16.1	16.1	15.8	738	0.6	2.4	13.1	48
02.06.2016 12:10:34	24.4	15	13.1	29.4	23.5	15.6	744	9.4	1.9	13.1	54
02.06.2016 12:10:40	14.3	14.2	13.2	14.3	14.3	14.3	750	0.1	1	13.2	60
02.06.2016 12:10:46	18.7	17.6	15.9	18.7	18.6	18	756	1.1	1.7	15.9	66
02.06.2016 12:10:52	20.4	16.3	15.3	20.4	20.3	17.7	762	4.1	1	15.3	72
02.06.2016 12:10:58	14	13.9	13.3	14	14	13.9	768	0.1	0.6	13.3	78
02.06.2016 12:11:04	18.9	15.7	14	40.5	25.4	16.3	774	3.2	1.7	14	84
02.06.2016 12:11:10	18.6	18	16.4	18.6	18.6	18.3	780	0.6	1.6	16.4	90
02.06.2016 12:11:16	23.9	18.5	16.4	23.9	23.5	19.5	786	5.4	2.1	16.4	96
02.06.2016 12:11:22	37	16.7	15.7	41.9	34.2	18	792	20.3	1	15.7	102
02.06.2016 12:11:28	13.4	13.3	12.4	13.4	13.4	13.3	798	0.1	0.9	12.4	108
02.06.2016 12:11:34	26	13.6	12.9	26.3	23.5	14.7	804	12.4	0.7	12.9	114
02.06.2016 12:11:40	12.2	12.2	12.1	12.2	12.2	12.2	810	0	0.1	12.1	120
02.06.2016 12:11:46	16.1	13.3	12.3	16.1	16.1	14.6	816	2.8	1	12.3	126
02.06.2016 12:11:52	27.3	13.5	12	32.3	25.6	14.3	822	13.8	1.5	12	132
02.06.2016 12:11:58	18.6	17.5	13.1	18.6	18.6	18	828	1.1	4.4	13.1	138
02.06.2016 12:12:04	12.5	12.3	11.2	12.5	12.5	12.4	834	0.2	1.1	11.2	144
02.06.2016 12:12:10	14.5	14.5	14.2	14.5	14.5	14.5	840	0	0.3	14.2	150
02.06.2016 12:12:16	11.2	11.2	10.8	11.2	11.2	11.2	846	0	0.4	10.8	156
02.06.2016 12:12:22	17.7	16.2	14.9	17.7	17.6	16.9	852	1.5	1.3	14.9	162
02.06.2016 12:12:28	10.3	10.3	10.3	10.3	10.3	10.3	858	0	0	10.3	168
02.06.2016 12:12:34	14.6	12.1	9.9	36.2	21.2	12.7	864	2.5	2.2	9.9	174
02.06.2016 12:12:40	11.8	11.7	11.2	11.8	11.8	11.7	870	0.1	0.5	11.2	180
02.06.2016 12:12:46	11.6	11.6	11.2	11.6	11.6	11.6	876	0	0.4	11.2	186
02.06.2016 12:12:52	15.2	14.4	12.6	15.2	15.2	14.8	882	0.8	1.8	12.6	192
02.06.2016 12:12:58	10.3	10.3	10.2	10.3	10.3	10.3	888	0	0.1	10.2	198
02.06.2016 12:13:04	29	14.5	12	34.4	26.6	15	894	14.5	2.5	12	204
02.06.2016 12:13:10	13.8	11.7	11.1	13.8	13.8	12.3	900	2.1	0.6	11.1	210
02.06.2016 12:13:16	11.5	11.4	10.5	11.5	11.5	11.5	906	0.1	0.9	10.5	216
02.06.2016 12:13:22	14.4	11.4	10.2	14.4	14.3	12.4	912	3	1.2	10.2	222
02.06.2016 12:13:28	11.2	11.2	10.9	11.2	11.2	11.2	918	0	0.3	10.9	228
02.06.2016 12:13:34	14.5	11.8	10.9	14.5	14.5	13	924	2.7	0.9	10.9	234
02.06.2016 12:13:40	20.6	11.4	10.8	25.6	19.8	12.3	930	9.2	0.6	10.8	240
02.06.2016 12:13:46	10.8	10.8	10.8	10.8	10.8	10.8	936	0	0	10.8	246
02.06.2016 12:13:52	11.8	11.8	11.7	11.8	11.8	11.8	942	0	0.1	11.7	252
02.06.2016 12:13:58	16.3	12.9	12.4	16.3	16.2	13.7	948	3.4	0.5	12.4	258
02.06.2016 12:14:04	14.2	13.7	12.9	14.2	14.2	13.9	954	0.5	0.8	12.9	264
02.06.2016 12:14:10	21.8	12.6	11.9	26.8	20.9	13.1	960	9.2	0.7	11.9	270
02.06.2016 12:14:16	12.6	12.6	12	12.6	12.6	12.6	966	0	0.6	12	276
02.06.2016 12:14:22	15.8	14.7	13.6	15.8	15.8	15.2	972	1.1	1.1	13.6	282
02.06.2016 12:14:28	16.7	16.7	15.8	16.7	16.7	16.7	978	0	0.9	15.8	288
02.06.2016 12:14:34	14.5	14	11.7	14.5	14.5	14.3	984	0.5	2.3	11.7	294
02.06.2016 12:14:40	15.1	11.7	10.5	15.1	15	12.8	990	3.4	1.2	10.5	300
02.06.2016 12:14:46	14.1	13.5	11.6	14.1	14.1	13.8	996	0.6	1.9	11.6	306
02.06.2016 12:14:52	10.4	10.4	10.1	10.4	10.4	10.4	1002	0	0.3	10.1	312
02.06.2016 12:14:58	13.2	12.9	11.8	13.2	13.2	13	1008	0.3	1.1	11.8	318
02.06.2016 12:15:04	15.2	14	12.6	15.2	15.2	14.6	1014	1.2	1.4	12.6	324
02.06.2016 12:15:10	224.6	166.2	37.2	229.6	222.4	184.6	1020	58.4	129	37.2	330
02.06.2016 12:15:16	2495.9	406.1	132.9	6332.7	2747.2	743.6	1026	2089.8	273.2	132.9	336
02.06.2016 12:15:22	918.2	54.6	32.5	1723.2	965.4	168.3	1032	863.6	22.1	32.5	342
02.06.2016 12:15:28	1198.6	334.8	89.5	2022.8	1226.6	489.9	1038	863.8	245.3	89.5	348
02.06.2016 12:15:34	1501.7	302.7	94.3	2735.5	1541	507.2	1044	1199	208.4	94.3	354
02.06.2016 12:15:40	28.9	14.1	13	674.6	164.6	14.8	1050	14.8	1.1	13	360
02.06.2016 12:15:46	699.5	259	65.6	1095.1	718.9	338.8	1056	440.5	193.4	65.6	366
02.06.2016 12:15:52	617.6	61.2	32.4	1057.7	591.8	132.7	1062	556.4	28.8	32.4	372
02.06.2016 12:15:58	701.4	323.4	90.6	1181.7	720.7	402.2	1068	378	232.8	90.6	378
02.06.2016 12:16:04	891.6	253.6	80.4	2132.4	958.9	376.9	1074	638	173.2	80.4	384
02.06.2016 12:16:10	517.7	100.4	38.6	892	518.3	182.7	1080	417.3	61.8	38.6	390
02.06.2016 12:16:16	469.2	98.8	40	633	450.1	157.4	1086	370.4	58.8	40	396
02.06.2016 12:16:22	373	69.1	35	479.9	354.8	123.5	1092	303.9	34.1	35	402
02.06.2016 12:16:28	302.2	120.2	40.8	414.9	309.4	160.2	1098	182	79.4	40.8	408
02.06.2016 12:16:34	370.4	93.4	37.1	489.8	367.4	142.6	1104	277	56.3	37.1	414
02.06.2016 12:16:40	284.9	77.4	32.6	540.9	302.6	118.9	1110	207.5	44.8	32.6	420
02.06.2016 12:16:46	263.3	70.6	25.7	501.7	277.6	107.4	1116	192.7	44.9	25.7	426
02.06.2016 12:16:52	187.1	53.4	23.8	202.7	175.3	79.3	1122	133.7	29.6	23.8	432
02.06.2016 12:16:58	169	50	22.6	366.8	158.3	67.5	1128	119	27.4	22.6	438
02.06.2016 12:17:04	161	55.1	24.5	197.9	159.9	76.4	1134	105.9	30.6	24.5	444
02.06.2016 12:17:10	178.2	55.6	24.2	206.2	171.3	77.3	1140	122.6	31.4	24.2	450
02.06.2016 12:17:16	215.4	71.5	26.6	434.8	210.4	97.1	1146	143.9	44.9	26.6	456
02.06.2016 12:17:22	200.3	49.8	22.2	359.3	214.8	78	1152	150.5	27.6	22.2	462
02.06.2016 12:17:28	155.1	48.9	21.6	215.3	158.1	69.6	1158	106.2	27.3	21.6	468
02.06.2016 12:17:34	114.8	45.4	17.8	199.3	122.9	61.7	1164	69.4	27.6	17.8	474
02.06.2016 12:17:40	127.5	62.2	25	190.1	131.2	80.4	1170	65.3	37.2	25	480
02.06.2016 12:17:46	107.5	32.1	17.1	107.8	100.6	49.1	1176	75.4	15	17.1	486
02.06.2016 12:17:52	87.7	28.5	19.6	93.1	82.2	40.3	1182	59.2	8.9	19.6	492
02.06.2016 12:17:58	82.7	37.3	18	88.1	78.5	46.4	1188	45.4	19.3	18	498
02.06.2016 12:18:04	73	31.8	20.1	77.9	70.7	42.7	1194	41.2	11.7	20.1	504
02.06.2016 12:18:10	149.3	66.2	26.2	218.3	146.1	79.8	1200	83.1	40	26.2	510
02.06.2016 12:18:16	107.7	45.7	20.2	250.2	116.9	62.4	1206	62	25.5	20.2	516
02.06.2016 12:18:22	114.1	43.9	18.6	119.1	108.9	59.6	1212	70.2	25.3	18.6	522
02.06.2016 12:18:28	78.4	42.1	19.2	120.9	84.4	52.4	1218	36.3	22.9	19.2	528
02.06.2016 12:18:34	98.3	39.2	17.2	130.2	99.7	50.1	1224	59.1	22	17.2	534
02.06.2016 12:18:40	79.2	39.3	20	79.9	75.4	49.1	1230	39.9	19.3	20	540
02.06.2016 12:18:46	70.9	37.3	18.7	70.9	69.3	47.4	1236	33.6	18.6	18.7	546
02.06.2016 12:18:52	92.9	33.2	17.9	98.2	87.9	45.5	1242	59.7	15.3	17.9	552
02.06.2016 12:18:58	71.9	38.1	16.4	71.9	69.1	45.6	1248	33.8	21.7	16.4	558
02.06.2016 12:19:04	68.5	34.2	17.9	111	73.9	42.1	1254	34.3	16.3	17.9	564
02.06.2016 12:19:10	60	31	17.3	60	58.9	39.8	1260	29	13.7	17.3	570
02.06.2016 12:19:16	95.4	30.1	16.7	110.7	89.1	40.6	1266	65.3	13.4	16.7	576
02.06.2016 12:19:22	60.4	29	15.8	60.4	58.9	38.8	1272	31.4	13.2	15.8	582
02.06.2016 12:19:28	51.1	25.8	14.6	115.2	63.6	30.9	1278	25.3	11.2	14.6	588
02.06.2016 12:19:34	69.9	29	16.3	75.2	65.2	35	1284	40.9	12.7	16.3	594
02.06.2016 12:19:40	85.9	32.7	16.4	100.8	81.5	42.6	1290	53.2	16.3	16.4	600
02.06.2016 12:19:46	79.3	39.5	20.2	84.3	77.8	51.4	1296	39.8	19.3	20.2	606
02.06.2016 12:19:52	73.2	32.1	15.7	83.9	68.1	37.4	1302	41.1	16.4	15.7	612
02.06.2016 12:19:58	63.7	27.9	16.4	163.6	66	37.9	1308	35.8	11.5	16.4	618
02.06.2016 12:20:04	60.6	21.7	14.3	61.2	55.4	28.6	1314	38.9	7.4	14.3	624
02.06.2016 12:20:10	60.1	24.1	14.2	65	57.4	31.4	1320	36	9.9	14.2	630
02.06.2016 12:20:16	38.8	18.2	13.1	38.8	37.2	22.9	1326	20.6	5.1	13.1	636
02.06.2016 12:20:22	47.1	21.3	14.4	47.5	44.1	26.2	1332	25.8	6.9	14.4	642
02.06.2016 12:20:28	44.3	19.5	12.9	44.6	41.9	25	1338	24.8	6.6	12.9	648
02.06.2016 12:20:34	48.4	19.6	13.3	48.7	45.5	25.8	1344	28.8	6.3	13.3	654
02.06.2016 12:20:40	44.3	20.6	13.4	70.9	49.7	26.1	1350	23.7	7.2	13.4	660
02.06.2016 12:20:46	46.9	24.5	14.6	47.2	44.2	28.9	1356	22.4	9.9	14.6	666
02.06.2016 12:20:52	57	17.1	13.3	62.4	53	23.5	1362	39.9	3.8	13.3	672
02.06.2016 12:20:58	53.3	20.7	12.1	58.6	49.6	25.8	1368	32.6	8.6	12.1	678
02.06.2016 12:21:04	38.8	21	12.7	39.1	36.8	25.2	1374	17.8	8.3	12.7
02.06.2016 12:21:10	48.9	24.6	13	106.5	53.4	29.6	1380	24.3	11.6	13
02.06.2016 12:21:16	56.6	21	12.8	88.5	58.7	24.1	1386	35.6	8.2	12.8
02.06.2016 12:21:22	42.8	26	14.2	43.1	40.8	29.4	1392	16.8	11.8	14.2
02.06.2016 12:21:28	57.9	21.6	13.1	63.3	54.5	28.4	1398	36.3	8.5	13.1
02.06.2016 12:21:34	43.4	20.4	12.6	65	47.5	24.6	1404	23	7.8	12.6
02.06.2016 12:21:40	65.8	37.6	20.1	65.8	64.5	45.6	1410	28.2	17.5	20.1
02.06.2016 12:21:46	82.4	30.3	14.1	92.7	77.9	39.4	1416	52.1	16.2	14.1
02.06.2016 12:21:52	61.2	23.8	13.6	61.6	58.6	33.9	1422	37.4	10.2	13.6
02.06.2016 12:21:58	74.8	26	16.4	79.8	70.3	34.9	1428	48.8	9.6	16.4
02.06.2016 12:22:04	60.2	28.6	17.3	60.5	56.9	35.5	1434	31.6	11.3	17.3
02.06.2016 12:22:10	63.4	30	15.6	63.4	61.5	39	1440	33.4	14.4	15.6
02.06.2016 12:22:16	44.6	19	12.7	71.1	49.9	24.9	1446	25.6	6.3	12.7
02.06.2016 12:22:22	48.7	23.2	13.8	49.1	46	29	1452	25.5	9.4	13.8
02.06.2016 12:22:28	33.7	20.7	14	33.7	33.5	25.8	1458	13	6.7	14
02.06.2016 12:22:34	26.6	15.2	11.2	26.6	26.2	18.9	1464	11.4	4	11.2
02.06.2016 12:22:40	32.8	16.7	12.7	32.8	32.4	22.1	1470	16.1	4	12.7
02.06.2016 12:22:46	41.1	26.8	14.8	62.7	47.5	31.6	1476	14.3	12	14.8
02.06.2016 12:22:52	31.8	16.4	12.6	31.8	31.2	20.8	1482	15.4	3.8	12.6
02.06.2016 12:22:58	43.8	21.9	12.8	44.2	41.9	27.5	1488	21.9	9.1	12.8
02.06.2016 12:23:04	35.5	24	13.1	35.5	35.3	28.4	1494	11.5	10.9	13.1
02.06.2016 12:23:10	29.8	18.8	14	29.8	29.6	23	1500	11	4.8	14
02.06.2016 12:23:16	48.8	16.1	12.4	63.8	46.1	19.9	1506	32.7	3.7	12.4
02.06.2016 12:23:22	53.3	21.7	15.6	58.6	50.1	26.6	1512	31.6	6.1	15.6
02.06.2016 12:23:28	35.3	17.4	12.2	35.3	33.7	22	1518	17.9	5.2	12.2
02.06.2016 12:23:34	35.4	18.8	13.3	35.7	32.9	21.7	1524	16.6	5.5	13.3
02.06.2016 12:23:40	31.5	19.8	12.6	31.5	30.7	23.3	1530	11.7	7.2	12.6
02.06.2016 12:23:46	39.8	18.2	11.7	77.4	45.6	22.4	1536	21.6	6.5	11.7
02.06.2016 12:23:52	33.8	18.9	11.4	33.8	33.6	24.8	1542	14.9	7.5	11.4
02.06.2016 12:23:58	40	22.1	12.7	40	38.5	26.3	1548	17.9	9.4	12.7
02.06.2016 12:24:04	44.3	22.2	12.9	44.3	43.5	28.8	1554	22.1	9.3	12.9
02.06.2016 12:24:10	31.2	22.1	14.6	31.2	31	25.1	1560	9.1	7.5	14.6
02.06.2016 12:24:16	36	23.5	14	36	35.1	27.1	1566	12.5	9.5	14
02.06.2016 12:24:22	33.3	16.9	13.4	33.3	31.8	20.1	1572	16.4	3.5	13.4
02.06.2016 12:24:28	29.2	21.3	14	29.2	28.9	23.8	1578	7.9	7.3	14
02.06.2016 12:24:34	49.4	21.4	13.9	49.4	48.1	29.1	1584	28	7.5	13.9
02.06.2016 12:24:40	60.5	22.2	14.1	61.2	55.7	29.3	1590	38.3	8.1	14.1
02.06.2016 12:24:46	39.9	22.6	14.1	40.2	38.1	27.2	1596	17.3	8.5	14.1
02.06.2016 12:24:52	59.1	22.4	15.3	74.1	56	26.2	1602	36.7	7.1	15.3
02.06.2016 12:24:58	32.2	19.3	12.7	32.2	31.9	23.7	1608	12.9	6.6	12.7
02.06.2016 12:25:04	55.6	21.3	13.5	65.5	52.5	26.3	1614	34.3	7.8	13.5
02.06.2016 12:25:10	40.2	20.9	13.5	40.6	37.7	24.7	1620	19.3	7.4	13.5
02.06.2016 12:25:16	47.6	24.5	13.7	48	44.7	28.6	1626	23.1	10.8	13.7
02.06.2016 12:25:22	37.3	19.2	13	37.7	35.2	22.8	1632	18.1	6.2	13
02.06.2016 12:25:28	29.2	16.2	11.6	86.9	35.4	19.6	1638	13	4.6	11.6
02.06.2016 12:25:34	31.2	19.5	12	31.2	30.6	22.6	1644	11.7	7.5	12
02.06.2016 12:25:40	38.4	18.4	12	60	43.5	22.8	1650	20	6.4	12
02.06.2016 12:25:46	22	15.2	12.2	22	21.8	17.9	1656	6.8	3	12.2
02.06.2016 12:25:52	27.7	16.2	12.4	49.6	32.6	18.1	1662	11.5	3.8	12.4
02.06.2016 12:25:58	17.5	14.6	12.3	17.5	17.5	15.9	1668	2.9	2.3	12.3
02.06.2016 12:26:04	26.2	16.2	12.1	26.2	25.9	18.9	1674	10	4.1	12.1
02.06.2016 12:26:10	18.3	14.2	12.5	18.3	18.3	16	1680	4.1	1.7	12.5
02.06.2016 12:26:16	21.1	11.9	10.1	21.1	20.3	14.3	1686	9.2	1.8	10.1
02.06.2016 12:26:22	19	10.9	8.9	19	18.1	12.4	1692	8.1	2	8.9
02.06.2016 12:26:28	17.2	13.5	11	17.2	17.1	14.8	1698	3.7	2.5	11
02.06.2016 12:26:34	15	13.2	10.7	15	14.9	14	1704	1.8	2.5	10.7
02.06.2016 12:26:40	23.1	16.1	10.9	23.1	23	18.9	1710	7	5.2	10.9
02.06.2016 12:26:46	23.9	15.1	10.9	23.9	23.7	17.9	1716	8.8	4.2	10.9
02.06.2016 12:26:52	21.4	14.5	11	43	27.8	16.4	1722	6.9	3.5	11
02.06.2016 12:26:58	28.1	15	11.7	28.5	26.4	17.7	1728	13.1	3.3	11.7
02.06.2016 12:27:04	18.3	12.6	9.8	18.3	18	14.1	1734	5.7	2.8	9.8
02.06.2016 12:27:10	19.6	12.3	9.5	19.6	19.2	14.2	1740	7.3	2.8	9.5
02.06.2016 12:27:16	11.5	11.4	10.3	11.5	11.5	11.4	1746	0.1	1.1	10.3
02.06.2016 12:27:22	22.9	16.2	11.1	22.9	22.7	18.4	1752	6.7	5.1	11.1
02.06.2016 12:27:28	23.9	17.6	16.2	23.9	23.9	20.4	1758	6.3	1.4	16.2
02.06.2016 12:27:34	17.2	14.4	11.9	17.2	17.2	15.7	1764	2.8	2.5	11.9
02.06.2016 12:27:40	21.8	11.7	9.8	21.8	21.3	14.4	1770	10.1	1.9	9.8
02.06.2016 12:27:46	17.7	15.1	14.2	55.2	25.4	16.3	1776	2.6	0.9	14.2
02.06.2016 12:27:52	20.9	14.6	13.8	20.9	20	15.3	1782	6.3	0.8	13.8
02.06.2016 12:27:58	18	13.7	11	18	17.7	14.6	1788	4.3	2.7	11
02.06.2016 12:28:04	20	14.1	11.4	20	19.9	16.3	1794	5.9	2.7	11.4
02.06.2016 12:28:10	18	14.6	13.4	18	18	15.8	1800	3.4	1.2	13.4
02.06.2016 12:28:16	18.9	13.3	11.5	18.9	18.6	14.8	1806	5.6	1.8	11.5
02.06.2016 12:28:22	16	11.6	11.3	16	15.9	12.9	1812	4.4	0.3	11.3
02.06.2016 12:28:28	25.6	14.6	11.6	25.9	23.9	16.4	1818	11	3	11.6
02.06.2016 12:28:34	28.4	19.9	16.9	28.7	26.7	20.9	1824	8.5	3	16.9
02.06.2016 12:28:40	10.7	10.2	8.9	10.7	10.7	10.4	1830	0.5	1.3	8.9
02.06.2016 12:28:46	27.7	16.5	12.3	32.7	26.9	18.3	1836	11.2	4.2	12.3
02.06.2016 12:28:52	34.8	13.8	11.8	44.8	33	16	1842	21	2	11.8
02.06.2016 12:28:58	19.9	16.8	14.6	19.9	19.9	17.8	1848	3.1	2.2	14.6
02.06.2016 12:29:04	24.6	15.1	13.5	24.6	23.9	16.9	1854	9.5	1.6	13.5
02.06.2016 12:29:10	13.3	13.2	12.1	13.3	13.3	13.3	1860	0.1	1.1	12.1
02.06.2016 12:29:16	19.8	13.6	11.8	19.8	19.4	15	1866	6.2	1.8	11.8
02.06.2016 12:29:22	19.5	15.5	11.6	19.5	19.4	16.9	1872	4	3.9	11.6
02.06.2016 12:29:28	12.9	12.9	12.8	12.9	12.9	12.9	1878	0	0.1	12.8
02.06.2016 12:29:34	16.4	12.4	10.8	16.4	16	13.2	1884	4	1.6	10.8
02.06.2016 12:29:40	11	11	10.8	11	11	11	1890	0	0.2	10.8
02.06.2016 12:29:46	13.2	13.2	12.8	13.2	13.2	13.2	1896	0	0.4	12.8
02.06.2016 12:29:52	23.6	14.2	13	23.6	22.7	15.9	1902	9.4	1.2	13
02.06.2016 12:29:58	14.8	14.7	13.5	14.8	14.8	14.8	1908	0.1	1.2	13.5
02.06.2016 12:30:04	25.5	18.7	15.4	25.5	25.1	20.4	1914	6.8	3.3	15.4
02.06.2016 12:30:10	21.3	11.8	9.3	26.3	20.5	12.8	1920	9.5	2.5	9.3
02.06.2016 12:30:16	12.8	11.4	8.8	12.8	12.8	12	1926	1.4	2.6	8.8
02.06.2016 12:30:22	18.6	9.9	8.4	18.6	17.9	11.4	1932	8.7	1.5	8.4
02.06.2016 12:30:28	15.8	14.6	11.6	15.8	15.8	15.1	1938	1.2	3	11.6
02.06.2016 12:30:34	9	9	8.9	9	9	9	1944	0	0.1	8.9
02.06.2016 12:30:40	11.5	9.3	8.6	11.5	11.4	9.9	1950	2.2	0.7	8.6
02.06.2016 12:30:46	24.8	15.8	12.2	25.2	23.2	17.1	1956	9	3.6	12.2
02.06.2016 12:30:52	16.4	11.5	10.6	16.4	16.1	12.7	1962	4.9	0.9	10.6
02.06.2016 12:30:58	13.1	11.4	9.1	50.6	20.8	12.2	1968	1.7	2.3	9.1
02.06.2016 12:31:04	18.5	9.8	9.8	18.5	18	11.6	1974	8.7	0	9.8
02.06.2016 12:31:10	9.4	9.3	8.8	9.4	9.4	9.4	1980	0.1	0.5	8.8
02.06.2016 12:31:16	13.4	13.4	13.4	13.4	13.4	13.4	1986	0	0	13.4
02.06.2016 12:31:22	9.6	9.6	9.3	9.6	9.6	9.6	1992	0	0.3	9.3
02.06.2016 12:31:28	16	15.4	13.8	16	16	15.7	1998	0.6	1.6	13.8
02.06.2016 12:31:34	15	15	14.4	15	15	15	2004	0	0.6	14.4
02.06.2016 12:31:40	17.5	11.9	9.6	17.5	17.4	13.7	2010	5.6	2.3	9.6
02.06.2016 12:31:46	9.8	9.7	8.9	9.8	9.8	9.7	2016	0.1	0.8	8.9
02.06.2016 12:31:52	13.2	11.1	10.5	34.8	19.8	11.6	2022	2.1	0.6	10.5
02.06.2016 12:31:58	9.5	9.5	9.1	9.5	9.5	9.5	2028	0	0.4	9.1
02.06.2016 12:32:04	16.5	9.5	8.8	16.8	14.8	9.9	2034	7	0.7	8.8
02.06.2016 12:32:10	11.2	10	8.9	11.2	11.2	10.5	2040	1.2	1.1	8.9
02.06.2016 12:32:16	13.3	9.4	8.8	13.3	13	10.2	2046	3.9	0.6	8.8

## Sheet: 8OS
date & time	PM10 [ug/m3]	PM2,5 [ug/m3]	PM1 [ug/m3]	Inhalable [ug/m3]	Thoracic [ug/m3]	Alveolic [ug/m3]	Zeit in sek	2.5 bis 10	1 bis 2.5	kleiner 1
02.06.2016 14:12:45	59.9	55	49.5	81.5	66.5	56.7	6	4.9	5.5	49.5		Sägedauer	54			Temperature [°C]	Humidity [%rH]
02.06.2016 14:12:51	59.2	47.6	43.5	196.9	80.7	49.6	12	11.6	4.1	43.5						23.71	55.42
02.06.2016 14:12:57	51.8	48	41.9	51.8	51.7	49.7	18	3.8	6.1	41.9						23.61	55
02.06.2016 14:13:03	51.6	39.7	33.2	51.9	49.9	42.2	24	11.9	6.5	33.2						23.61	54.06
02.06.2016 14:13:09	51.6	47.3	42.8	73.2	58.2	48.8	30	4.3	4.5	42.8						23.52	54.06
02.06.2016 14:13:15	64.1	27.6	26.7	84.4	59.2	28.2	36	36.5	0.9	26.7						23.52	54.27
02.06.2016 14:13:21	39	34.1	31.4	39	38.7	35.3	42	4.9	2.7	31.4						23.42	55
02.06.2016 14:13:27	52.5	34.8	32.5	52.8	49.7	37.2	48	17.7	2.3	32.5						23.42	56.05
02.06.2016 14:13:33	37.5	36.1	33.7	37.5	37.5	36.7	54	1.4	2.4	33.7						23.42	56.88
02.06.2016 14:13:39	66.1	40.5	37.9	66.8	61.6	43.3	60	25.6	2.6	37.9						23.42	57.19
02.06.2016 14:13:45	33.8	33.7	32.4	33.8	33.8	33.7	66	0.1	1.3	32.4						23.42	58.13
02.06.2016 14:13:51	39.6	35.3	32	39.6	39.5	36.8	72	4.3	3.3	32						23.42	58.55
02.06.2016 14:13:57	37	33.5	31.9	80.2	50.2	34.1	78	3.5	1.6	31.9						23.42	58.55
02.06.2016 14:14:03	34.4	31.7	28.2	34.4	34.3	32.5	84	2.7	3.5	28.2						23.42	58.34
02.06.2016 14:14:09	48	35.3	30.6	53	47.1	37	90	12.7	4.7	30.6						23.52	57.72
02.06.2016 14:14:15	33.7	21	20.7	55.7	38.5	22.4	96	12.7	0.3	20.7						23.52	55.63
02.06.2016 14:14:21	27.7	25	23.3	27.7	27.6	26.2	102	2.7	1.7	23.3						23.52	55.11
02.06.2016 14:14:27	38.1	35.3	32.7	38.1	38.1	36.6	108	2.8	2.6	32.7						23.52	53.85
02.06.2016 14:14:33	30	28.3	26	30	30	29.1	114	1.7	2.3	26						23.52	52.81
02.06.2016 14:14:39	29.5	25.4	24.3	29.5	29.4	26.9	120	4.1	1.1	24.3						23.52	53.02
02.06.2016 14:14:45	41.9	27.7	25.5	84.4	48	29.1	126	14.2	2.2	25.5						23.52	54.27
02.06.2016 14:14:51	32.5	32.5	31.9	32.5	32.5	32.5	132	0	0.6	31.9						23.52	55.52
02.06.2016 14:14:57	24.6	24.6	24.3	24.6	24.6	24.6	138	0	0.3	24.3						23.52	56.25
02.06.2016 14:15:03	28.9	26.9	25.9	28.9	28.9	27.8	144	2	1	25.9						23.52	57.09
02.06.2016 14:15:09	35.1	27.4	26.4	77.6	42	27.7	150	7.7	1	26.4						23.52	57.51
02.06.2016 14:15:15	45.1	43.7	41.6	45.1	45.1	44.3	156	1.4	2.1	41.6						23.61	58.03
02.06.2016 14:15:21	40	37.1	33.6	40	39.9	38	162	2.9	3.5	33.6						23.61	57.92
02.06.2016 14:15:27	57.8	45.8	43.9	84.3	63.4	47.1	168	12	1.9	43.9						23.71	57.72
02.06.2016 14:15:33	72.7	44.7	41.4	77.7	69.8	48.7	174	28	3.3	41.4						23.71	57.4
02.06.2016 14:15:39	42.2	31.2	27.6	42.6	40.3	32.4	180	11	3.6	27.6						23.71	55.73
02.06.2016 14:15:45	54.2	27.3	26.4	59.8	49.2	28.5	186	26.9	0.9	26.4						23.71	55
02.06.2016 14:15:51	26.5	24	21.1	26.5	26.5	25.1	192	2.5	2.9	21.1						23.71	53.33
02.06.2016 14:15:57	25.5	25.5	24.8	25.5	25.5	25.5	198	0	0.7	24.8						23.71	51.76
02.06.2016 14:16:03	47.5	34.6	31.9	74.1	53.3	36.7	204	12.9	2.7	31.9						23.61	51.97
02.06.2016 14:16:09	23.8	23.8	23.4	23.8	23.8	23.8	210	0	0.4	23.4						23.71	52.91
02.06.2016 14:16:15	43.9	35.8	33.7	44.3	42.3	36.7	216	8.1	2.1	33.7						23.71	53.75
02.06.2016 14:16:21	27.3	27.3	27	27.3	27.3	27.3	222	0	0.3	27						23.71	55.21
02.06.2016 14:16:27	28.1	28.1	27.7	28.1	28.1	28.1	228	0	0.4	27.7						23.71	55.94
02.06.2016 14:16:33	30.6	28.5	26.7	30.6	30.5	29.1	234	2.1	1.8	26.7						23.71	56.67
02.06.2016 14:16:39	31.5	31.4	30	31.5	31.5	31.4	240	0.1	1.4	30
02.06.2016 14:16:45	39.8	33.4	29.8	61.4	46.1	34.4	246	6.4	3.6	29.8
02.06.2016 14:16:51	58.9	41.2	38.5	64.2	56.3	42.7	252	17.7	2.7	38.5
02.06.2016 14:16:57	40	38	35.7	40	39.9	38.5	258	2	2.3	35.7
02.06.2016 14:17:03	40.9	37.8	36.3	40.9	40.9	38.9	264	3.1	1.5	36.3
02.06.2016 14:17:09	34.8	33.8	30.2	34.8	34.8	34.2	270	1	3.6	30.2
02.06.2016 14:17:15	38.5	37.7	36.3	38.5	38.5	38.1	276	0.8	1.4	36.3
02.06.2016 14:17:21	37.9	34.2	31.3	37.9	37.6	34.8	282	3.7	2.9	31.3
02.06.2016 14:17:27	35.1	34.1	31	35.1	35.1	34.6	288	1	3.1	31
02.06.2016 14:17:33	34.9	30	29	34.9	34.8	31.8	294	4.9	1	29
02.06.2016 14:17:39	23.1	23	22.2	23.1	23.1	23	300	0.1	0.8	22.2
02.06.2016 14:17:45	35.4	31.3	27.5	35.4	35.3	32.7	306	4.1	3.8	27.5
02.06.2016 14:17:51	30.4	30.4	29.2	30.4	30.4	30.4	312	0	1.2	29.2
02.06.2016 14:17:57	43.7	32.7	30.2	107.8	57.1	33.6	318	11	2.5	30.2
02.06.2016 14:18:03	52.5	38.3	37.4	57.5	50.8	39.3	324	14.2	0.9	37.4
02.06.2016 14:18:09	41	39.1	37.6	41	40.9	39.5	330	1.9	1.5	37.6
02.06.2016 14:18:15	45.9	40	36.1	45.9	45.8	42.2	336	5.9	3.9	36.1
02.06.2016 14:18:21	49	41.4	38	49.3	47.4	42	342	7.6	3.4	38
02.06.2016 14:18:27	46	34.3	33.3	51	45.1	35.6	348	11.7	1	33.3
02.06.2016 14:18:33	34.8	32.6	29.2	34.8	34.8	33.6	354	2.2	3.4	29.2
02.06.2016 14:18:39	25.3	24.4	23.5	62.8	33	24.8	360	0.9	0.9	23.5
02.06.2016 14:18:45	36.8	27.4	26.8	41.8	35.9	28.4	366	9.4	0.6	26.8
02.06.2016 14:18:51	29.6	25.1	24.2	51.2	36.2	26.3	372	4.5	0.9	24.2
02.06.2016 14:18:57	41.8	36.4	33.8	41.8	41.4	37.4	378	5.4	2.6	33.8
02.06.2016 14:19:03	41.3	36.6	31.2	41.3	41.2	38.3	384	4.7	5.4	31.2
02.06.2016 14:19:09	28.7	28.6	27	28.7	28.7	28.7	390	0.1	1.6	27
02.06.2016 14:19:15	46	35.4	32.1	188.1	58	36.5	396	10.6	3.3	32.1
02.06.2016 14:19:21	36.2	30.6	27.8	57.8	42.8	32.3	402	5.6	2.8	27.8
02.06.2016 14:19:27	36.8	33.6	31.4	36.8	36.8	35	408	3.2	2.2	31.4
02.06.2016 14:19:33	37.3	30.5	27.5	37.3	36.9	32.2	414	6.8	3	27.5
02.06.2016 14:19:39	40.7	36.7	32.4	40.7	40.6	38.1	420	4	4.3	32.4
02.06.2016 14:19:45	32.9	27	24.6	132.5	37.7	28.3	426	5.9	2.4	24.6
02.06.2016 14:19:51	39.3	28.8	27.5	39.3	37.7	30	432	10.5	1.3	27.5
02.06.2016 14:19:57	50.7	40.2	36.5	55.7	49.8	41.7	438	10.5	3.7	36.5
02.06.2016 14:20:03	35.7	27	24.7	93.4	42.4	29.8	444	8.7	2.3	24.7
02.06.2016 14:20:09	39.2	27.1	24.8	44.2	38.3	28.5	450	12.1	2.3	24.8
02.06.2016 14:20:15	43.4	27.4	23.3	43.7	40.9	29.7	456	16	4.1	23.3
02.06.2016 14:20:21	41.8	29.8	29.4	68.4	47.4	30.7	462	12	0.4	29.4
02.06.2016 14:20:27	48	28.9	27.2	79.6	52.9	30.1	468	19.1	1.7	27.2
02.06.2016 14:20:33	48.1	30.4	27.3	48.5	45.3	32.8	474	17.7	3.1	27.3
02.06.2016 14:20:39	67.3	37.7	35.5	139.9	71.7	41.3	480	29.6	2.2	35.5
02.06.2016 14:20:45	44	39.6	34.2	81.5	51.6	41.2	486	4.4	5.4	34.2
02.06.2016 14:20:51	79.1	26.2	23.7	446.2	110.8	29.2	492	52.9	2.5	23.7
02.06.2016 14:20:57	62.3	38.5	30.3	162.6	64	42.9	498	23.8	8.2	30.3
02.06.2016 14:21:03	53.1	37.9	34.3	53.1	51.9	41.6	504	15.2	3.6	34.3
02.06.2016 14:21:09	59.2	38.5	34.8	279.1	76.2	41.4	510	20.7	3.7	34.8
02.06.2016 14:21:15	28	22.8	21.5	49.6	34.5	24.3	516	5.2	1.3	21.5
02.06.2016 14:21:21	31.7	20.7	20.2	91.2	44.3	21.7	522	11	0.5	20.2
02.06.2016 14:21:27	40.9	26.8	26	480.1	69.6	28.8	528	14.1	0.8	26
02.06.2016 14:21:33	24.3	24.3	24	24.3	24.3	24.3	534	0	0.3	24
02.06.2016 14:21:39	56.3	24.8	23.6	71.2	53.3	27.4	540	31.5	1.2	23.6
02.06.2016 14:21:45	50.5	36.6	33.9	55.5	49.3	38.2	546	13.9	2.7	33.9
02.06.2016 14:21:51	35.2	24.1	22.1	40.2	34.3	25.5	552	11.1	2	22.1
02.06.2016 14:21:57	41.3	22	20.5	46.6	38.7	23.9	558	19.3	1.5	20.5
02.06.2016 14:22:03	35.9	30.5	24.4	35.9	35.8	32.5	564	5.4	6.1	24.4
02.06.2016 14:22:09	44.6	28.7	25.3	71.2	49.5	30	570	15.9	3.4	25.3
02.06.2016 14:22:15	28.5	20.2	18.6	71.7	40.9	21.2	576	8.3	1.6	18.6
02.06.2016 14:22:21	27.2	26.5	23.9	27.2	27.2	26.8	582	0.7	2.6	23.9
02.06.2016 14:22:27	23.1	20.5	19.8	80.7	29.9	21.3	588	2.6	0.7	19.8
02.06.2016 14:22:33	31.4	23.3	20	69.3	37.5	24.2	594	8.1	3.3	20
02.06.2016 14:22:39	20.4	20.3	19.1	20.4	20.4	20.3	600	0.1	1.2	19.1
02.06.2016 14:22:45	29.3	22.2	21	50.9	35.6	23.9	606	7.1	1.2	21
02.06.2016 14:22:51	33.5	27.7	23.5	71	41.1	30	612	5.8	4.2	23.5
02.06.2016 14:22:57	27.7	19.4	18.6	49.3	33.9	21.3	618	8.3	0.8	18.6
02.06.2016 14:23:03	36.6	18.3	17.2	63.5	40.6	19.7	624	18.3	1.1	17.2
02.06.2016 14:23:09	22.8	19.4	18.5	22.8	22.7	20.6	630	3.4	0.9	18.5
02.06.2016 14:23:15	22	20.7	19.8	79.6	28.9	21.2	636	1.3	0.9	19.8
02.06.2016 14:23:21	40	22	20.3	45.3	37.5	24	642	18	1.7	20.3
02.06.2016 14:23:27	37.3	17.2	16.9	38	33.2	18.6	648	20.1	0.3	16.9
02.06.2016 14:23:33	27.8	20.3	19.4	169.9	39.9	20.4	654	7.5	0.9	19.4
02.06.2016 14:23:39	28.5	26.3	24.2	28.5	28.4	27.3	660	2.2	2.1	24.2
02.06.2016 14:23:45	21.7	19	18.6	21.7	21.6	19.9	666	2.7	0.4	18.6
02.06.2016 14:23:51	34.4	22.9	21.4	39.3	33.5	24.4	672	11.5	1.5	21.4
02.06.2016 14:23:57	34.4	23	20.4	39.4	33.2	23.8	678	11.4	2.6	20.4
02.06.2016 14:24:03	19	18.9	18.4	19	19	18.9	684	0.1	0.5	18.4
02.06.2016 14:24:09	35.7	20	18.9	73.6	40.8	21.8	690	15.7	1.1	18.9
02.06.2016 14:24:15	24.1	22.4	20.9	24.1	24.1	23.2	696	1.7	1.5	20.9
02.06.2016 14:24:21	24.4	19.5	19	24.4	24	20.3	702	4.9	0.5	19
02.06.2016 14:24:27	40.9	21.5	19.8	46.2	37.6	22.5	708	19.4	1.7	19.8
02.06.2016 14:24:33	34.1	22.8	19.9	34.4	32.1	24.1	714	11.3	2.9	19.9
02.06.2016 14:24:39	27.4	25.6	21.7	27.4	27.4	26.4	720	1.8	3.9	21.7
02.06.2016 14:24:45	38.1	21.8	20.5	43.4	35.6	22.7	726	16.3	1.3	20.5
02.06.2016 14:24:51	24	23.4	21.8	24	24	23.6	732	0.6	1.6	21.8
02.06.2016 14:24:57	51.4	22.8	21.9	66.3	48	23.7	738	28.6	0.9	21.9
02.06.2016 14:25:03	25.8	21.7	21.2	25.8	25.5	22.5	744	4.1	0.5	21.2
02.06.2016 14:25:09	23.3	22.1	21.4	23.3	23.3	22.6	750	1.2	0.7	21.4
02.06.2016 14:25:15	47.5	32.3	28.7	47.8	44.7	33.6	756	15.2	3.6	28.7
02.06.2016 14:25:21	40	28.3	25.9	66.6	45.7	29.5	762	11.7	2.4	25.9
02.06.2016 14:25:27	19.4	19.4	18.8	19.4	19.4	19.4	768	0	0.6	18.8
02.06.2016 14:25:33	34.8	24.6	22.2	34.8	33.8	26.7	774	10.2	2.4	22.2
02.06.2016 14:25:39	20.7	20.7	20.3	20.7	20.7	20.7	780	0	0.4	20.3
02.06.2016 14:25:45	36.9	33	22.1	36.9	36.9	34.7	786	3.9	10.9	22.1
02.06.2016 14:25:51	41.1	21.6	21.2	51.1	38.7	22.1	792	19.5	0.4	21.2
02.06.2016 14:25:57	30	22.4	20.7	30.3	28.4	23.1	798	7.6	1.7	20.7
02.06.2016 14:26:03	33.7	25.6	23.8	133.6	37.2	26.4	804	8.1	1.8	23.8
02.06.2016 14:26:09	28.7	27.5	24.7	28.7	28.7	28	810	1.2	2.8	24.7
02.06.2016 14:26:15	28.9	24.9	23	28.9	28.8	26.3	816	4	1.9	23
02.06.2016 14:26:21	44.1	21.9	21.1	54	41.5	23.2	822	22.2	0.8	21.1
02.06.2016 14:26:27	21.2	21.2	21.1	21.2	21.2	21.2	828	0	0.1	21.1
02.06.2016 14:26:33	26.8	26.6	24.7	26.8	26.8	26.7	834	0.2	1.9	24.7
02.06.2016 14:26:39	38.2	20.2	19.6	85.7	43.9	20.8	840	18	0.6	19.6
02.06.2016 14:26:45	22.2	22.2	21.3	22.2	22.2	22.2	846	0	0.9	21.3
02.06.2016 14:26:51	23	22.8	21.5	23	23	22.9	852	0.2	1.3	21.5
02.06.2016 14:26:57	30.1	29.3	27.2	30.1	30.1	29.7	858	0.8	2.1	27.2
02.06.2016 14:27:03	29.1	29.1	28.5	29.1	29.1	29.1	864	0	0.6	28.5
02.06.2016 14:27:09	39.2	25	23.7	39.5	37.3	27.5	870	14.2	1.3	23.7
02.06.2016 14:27:15	19.4	19.3	18.8	19.4	19.4	19.3	876	0.1	0.5	18.8
02.06.2016 14:27:21	22.4	22.4	22.2	22.4	22.4	22.4	882	0	0.2	22.2
02.06.2016 14:27:27	24.4	23	21.4	24.4	24.4	23.7	888	1.4	1.6	21.4
02.06.2016 14:27:33	25.1	24.1	21.5	25.1	25.1	24.6	894	1	2.6	21.5
02.06.2016 14:27:39	25.8	25	22.4	25.8	25.8	25.4	900	0.8	2.6	22.4
02.06.2016 14:27:45	22.3	22.3	21.8	22.3	22.3	22.3	906	0	0.5	21.8
02.06.2016 14:27:51	43.3	26	24.6	48.6	40.8	27.7	912	17.3	1.4	24.6
02.06.2016 14:27:57	35.3	25.6	24.3	40.3	34.4	26.3	918	9.7	1.3	24.3
02.06.2016 14:28:03	33.3	25.2	24.1	71.1	39.3	26.1	924	8.1	1.1	24.1
02.06.2016 14:28:09	40.6	24.9	24.6	145.5	43.3	25.9	930	15.7	0.3	24.6
02.06.2016 14:28:15	24.6	24.6	24.5	24.6	24.6	24.6	936	0	0.1	24.5
02.06.2016 14:28:21	29.6	24.8	24.3	29.6	28.8	25.2	942	4.8	0.5	24.3
02.06.2016 14:28:27	31.1	29.6	27.4	31.1	31.1	30.3	948	1.5	2.2	27.4
02.06.2016 14:28:33	26.7	26.7	26.4	26.7	26.7	26.7	954	0	0.3	26.4
02.06.2016 14:28:39	26.1	25.6	24.9	26.1	26.1	25.8	960	0.5	0.7	24.9	0
02.06.2016 14:28:45	43.8	29.6	28.7	49.1	41.3	29.9	966	14.2	0.9	28.7	6
02.06.2016 14:28:51	39.1	29.7	28.2	39.4	37.4	31.2	972	9.4	1.5	28.2	12
02.06.2016 14:28:57	43.7	26.9	25.6	44.1	40.9	28.9	978	16.8	1.3	25.6	18
02.06.2016 14:29:03	27.6	26.7	25.6	27.6	27.6	27.1	984	0.9	1.1	25.6	24
02.06.2016 14:29:09	37	30.2	29	37	36.2	31.5	990	6.8	1.2	29	30
02.06.2016 14:29:15	55.7	34.2	32.2	78	58.6	36.5	996	21.5	2	32.2	36
02.06.2016 14:29:21	35.6	27.1	25.1	57.5	40.6	27.7	1002	8.5	2	25.1	42
02.06.2016 14:29:27	35.5	26.6	25.9	79.1	47.1	26.9	1008	8.9	0.7	25.9	48
02.06.2016 14:29:33	36.2	28	26.9	36.5	34.6	28.9	1014	8.2	1.1	26.9	54
02.06.2016 14:29:39	23.4	23.4	23.3	23.4	23.4	23.4	1020	0	0.1	23.3	60
02.06.2016 14:29:45	33.5	31.5	30.4	33.5	33.5	32.4	1026	2	1.1	30.4	66
02.06.2016 14:29:51	28.7	28.7	28.6	28.7	28.7	28.7	1032	0	0.1	28.6	72
02.06.2016 14:29:57	24	23.9	22.9	24	24	23.9	1038	0.1	1	22.9	78
02.06.2016 14:30:03	25.5	25.4	24.8	25.5	25.5	25.4	1044	0.1	0.6	24.8	84
02.06.2016 14:30:09	30	30	29.4	30	30	30	1050	0	0.6	29.4	90
02.06.2016 14:30:15	36	35.4	33.5	36	36	35.7	1056	0.6	1.9	33.5	96
02.06.2016 14:30:21	40.3	26.5	25.8	45.2	38.6	27.3	1062	13.8	0.7	25.8	102
02.06.2016 14:30:27	33.5	29.4	27	33.5	33.4	30.9	1068	4.1	2.4	27	108
02.06.2016 14:30:33	21.4	21.4	21.4	21.4	21.4	21.4	1074	0	0	21.4	114
02.06.2016 14:30:39	27.7	27.7	27.3	27.7	27.7	27.7	1080	0	0.4	27.3	120
02.06.2016 14:30:45	31.7	25.6	24.4	31.7	31.3	27.3	1086	6.1	1.2	24.4	126
02.06.2016 14:30:51	24	23.5	21.5	24	24	23.7	1092	0.5	2	21.5	132
02.06.2016 14:30:57	25.6	25.6	25.6	25.6	25.6	25.6	1098	0	0	25.6	138
02.06.2016 14:31:03	22	22	21.7	22	22	22	1104	0	0.3	21.7	144
02.06.2016 14:31:09	24.9	23.9	23.4	24.9	24.9	24.3	1110	1	0.5	23.4	150
02.06.2016 14:31:15	22.7	22.7	22.6	22.7	22.7	22.7	1116	0	0.1	22.6	156
02.06.2016 14:31:21	20.9	20.9	20.7	20.9	20.9	20.9	1122	0	0.2	20.7	162
02.06.2016 14:31:27	26.8	22.1	20.8	26.8	26.5	23.2	1128	4.7	1.3	20.8	168
02.06.2016 14:31:33	33.5	30.7	27	33.5	33.4	31.6	1134	2.8	3.7	27	174
02.06.2016 14:31:39	44.8	33	30.1	49.8	43.8	34.3	1140	11.8	2.9	30.1	180
02.06.2016 14:31:45	34	30	29.2	71.5	41.4	30.8	1146	4	0.8	29.2	186
02.06.2016 14:31:51	24.8	23.2	22.4	24.8	24.8	23.9	1152	1.6	0.8	22.4	192
02.06.2016 14:31:57	24.6	21	19.9	24.6	24.6	22.2	1158	3.6	1.1	19.9	198
02.06.2016 14:32:03	20.3	20.3	20.2	20.3	20.3	20.3	1164	0	0.1	20.2	204
02.06.2016 14:32:09	24.6	24.2	23	24.6	24.6	24.4	1170	0.4	1.2	23	210
02.06.2016 14:32:15	33.2	24.1	21.5	38.1	32.3	24.9	1176	9.1	2.6	21.5	216
02.06.2016 14:32:21	22	21.5	20.1	22	22	21.7	1182	0.5	1.4	20.1	222
02.06.2016 14:32:27	23.8	22	20.1	45.4	30.4	22.3	1188	1.8	1.9	20.1	228
02.06.2016 14:32:33	30.9	21.5	20.5	35.9	30	22.1	1194	9.4	1	20.5	234
02.06.2016 14:32:39	29.4	23.4	22.3	29.4	29.1	24.7	1200	6	1.1	22.3	240
02.06.2016 14:32:45	26.9	22.5	20.6	26.9	26.6	23.5	1206	4.4	1.9	20.6	246
02.06.2016 14:32:51	28	23.9	22.8	28	27.7	24.7	1212	4.1	1.1	22.8	252
02.06.2016 14:32:57	22.5	18.5	17	22.5	22.3	19.5	1218	4	1.5	17	258
02.06.2016 14:33:03	20.1	20.1	19.5	20.1	20.1	20.1	1224	0	0.6	19.5	264
02.06.2016 14:33:09	20.4	19.4	18.7	20.4	20.3	19.8	1230	1	0.7	18.7	270
02.06.2016 14:33:15	15.8	15.8	15.8	15.8	15.8	15.8	1236	0	0	15.8	276
02.06.2016 14:33:21	17.8	16.6	16	17.8	17.8	17.1	1242	1.2	0.6	16	282
02.06.2016 14:33:27	31.6	17.4	16.8	37	29.2	17.8	1248	14.2	0.6	16.8	288
02.06.2016 14:33:33	25.4	22.7	22	25.4	25.3	23.5	1254	2.7	0.7	22	294
02.06.2016 14:33:39	23.1	23.1	22.5	23.1	23.1	23.1	1260	0	0.6	22.5	300
02.06.2016 14:33:45	18.9	18.4	17.7	18.9	18.9	18.6	1266	0.5	0.7	17.7	306
02.06.2016 14:33:51	19.2	19.2	19.2	19.2	19.2	19.2	1272	0	0	19.2	312
02.06.2016 14:33:57	20.3	19.2	18.2	20.3	20.3	19.7	1278	1.1	1	18.2	318
02.06.2016 14:34:03	19.4	19.4	19.2	19.4	19.4	19.4	1284	0	0.2	19.2	324
02.06.2016 14:34:09	18.4	18.3	17.6	18.4	18.4	18.3	1290	0.1	0.7	17.6	330
02.06.2016 14:34:15	19	18.9	18	19	19	18.9	1296	0.1	0.9	18	336
02.06.2016 14:34:21	41.4	22	20.8	141.4	44	25.1	1302	19.4	1.2	20.8	342
02.06.2016 14:34:27	90.9	18.7	18	301.6	98.6	21.9	1308	72.2	0.7	18	348
2016-06-02 14:34:33	76.9	31.3	20.9	215.3	92.8	36.7	1314	45.6	10.4	20.9	354
02.06.2016 14:34:39	181.8	29.2	22	1955.3	306.1	46.9	1320	152.6	7.2	22	360
02.06.2016 14:34:45	167.7	27.8	20	1612.6	207.3	47.7	1326	139.9	7.8	20	366
02.06.2016 14:34:51	85.5	30.9	22.3	561	134	40.1	1332	54.6	8.6	22.3	372
02.06.2016 14:34:57	120.9	24	21.3	457.2	141.2	34.2	1338	96.9	2.7	21.3	378
02.06.2016 14:35:03	64.1	22.6	21.7	1334	120	23.8	1344	41.5	0.9	21.7	384
02.06.2016 14:35:09	83.4	26.5	24.4	1311.9	149.7	31.3	1350	56.9	2.1	24.4	390
02.06.2016 14:35:15	110.5	24.7	22.4	1840.1	176.3	36.1	1356	85.8	2.3	22.4	396
02.06.2016 14:35:21	249.7	76.9	33.4	1467.1	306	99.2	1362	172.8	43.5	33.4	402
02.06.2016 14:35:27	268.5	65	30.5	825.3	312.2	93.8	1368	203.5	34.5	30.5	408
02.06.2016 14:35:33	235.3	71.3	31.5	1545.9	359.5	101	1374	164	39.8	31.5	414
02.06.2016 14:35:39	352.2	83.5	34	1248.7	409.4	116.2	1380	268.7	49.5	34	420
02.06.2016 14:35:45	245.5	67.1	31.6	599.6	274.6	97	1386	178.4	35.5	31.6	426
02.06.2016 14:35:51	158.1	47.9	28	955.5	222.3	67.3	1392	110.2	19.9	28	432
02.06.2016 14:35:57	197.6	41.3	26.6	778.3	252.4	61.8	1398	156.3	14.7	26.6	438
02.06.2016 14:36:03	181.6	47.4	27.3	430.3	199.7	66.5	1404	134.2	20.1	27.3	444
02.06.2016 14:36:09	192.2	40.6	23.2	442.2	217.4	58.6	1410	151.6	17.4	23.2	450
02.06.2016 14:36:15	132.9	40.3	24.8	614	173.6	55.1	1416	92.6	15.5	24.8	456
02.06.2016 14:36:21	149.5	22.4	18.2	394.9	184.1	39.8	1422	127.1	4.2	18.2	462
02.06.2016 14:36:27	181.6	41.1	23.4	394.7	204.9	54.8	1428	140.5	17.7	23.4	468
02.06.2016 14:36:33	141.1	28.9	21.3	232.1	143.2	44.7	1434	112.2	7.6	21.3	474
02.06.2016 14:36:39	76.5	38	21.2	271.3	93.6	47.2	1440	38.5	16.8	21.2	480
02.06.2016 14:36:45	106.5	29.5	19.3	182.6	116.2	38.8	1446	77	10.2	19.3	486
02.06.2016 14:36:51	126.2	32.9	23.6	322.8	140.6	44.3	1452	93.3	9.3	23.6	492
02.06.2016 14:36:57	105.3	35.4	22.4	380.7	101	46.1	1458	69.9	13	22.4	498
02.06.2016 14:37:03	111.5	35	24.4	134.2	107.8	46.6	1464	76.5	10.6	24.4	504
02.06.2016 14:37:09	113.2	32.2	24.1	128.5	105	44.5	1470	81	8.1	24.1	510
02.06.2016 14:37:15	105.8	33	21.8	148.3	103.7	41.4	1476	72.8	11.2	21.8	516
02.06.2016 14:37:21	92	34.6	23	119.3	91.5	43.8	1482	57.4	11.6	23	522
02.06.2016 14:37:27	66.4	23.2	18.4	232	95.6	29.6	1488	43.2	4.8	18.4	528
02.06.2016 14:37:33	68.2	29.8	18.8	131.1	71.1	35.8	1494	38.4	11	18.8	534
02.06.2016 14:37:39	101.2	37	26.2	145.4	106.2	47.7	1500	64.2	10.8	26.2	540
02.06.2016 14:37:45	86.4	24.6	20.7	404.4	95.9	33.8	1506	61.8	3.9	20.7	546
02.06.2016 14:37:51	74.9	19.9	18.4	107.1	74.5	25.8	1512	55	1.5	18.4	552
02.06.2016 14:37:57	89.2	41.8	24.2	94.5	84.1	49.6	1518	47.4	17.6	24.2	558
02.06.2016 14:38:03	103.4	29.1	21.7	231	105.5	40.3	1524	74.3	7.4	21.7	564
02.06.2016 14:38:09	96.5	23	19.6	140.7	98.7	31.8	1530	73.5	3.4	19.6	570
02.06.2016 14:38:15	68.7	19.9	18.5	112.3	69.1	25.8	1536	48.8	1.4	18.5	576
02.06.2016 14:38:21	51.6	25.5	19.5	51.6	50	31.9	1542	26.1	6	19.5	582
02.06.2016 14:38:27	98.5	37.3	23.7	179.9	112.1	47.2	1548	61.2	13.6	23.7	588
02.06.2016 14:38:33	76.9	38.1	23.5	119.7	80.2	44.6	1554	38.8	14.6	23.5	594
02.06.2016 14:38:39	74.7	30	21.9	229.7	98.4	37.4	1560	44.7	8.1	21.9	600
02.06.2016 14:38:45	79	25	20.5	84.3	73.6	34.8	1566	54	4.5	20.5	606
02.06.2016 14:38:51	54.5	32.4	21	92.3	60	37.5	1572	22.1	11.4	21	612
02.06.2016 14:38:57	40.9	20.9	17.5	78.4	47.8	26.7	1578	20	3.4	17.5	618
02.06.2016 14:39:03	52	19.1	15.9	74	54.3	24	1584	32.9	3.2	15.9	624
02.06.2016 14:39:09	49.5	23.3	19.7	49.5	47.1	28.8	1590	26.2	3.6	19.7	630
02.06.2016 14:39:15	63.7	37.6	23	64	61.4	43.6	1596	26.1	14.6	23	636
02.06.2016 14:39:21	84.7	36.6	27.1	111.6	85.9	44.4	1602	48.1	9.5	27.1	642
02.06.2016 14:39:27	71.5	19.1	17	140.5	80.2	24.9	1608	52.4	2.1	17	648
02.06.2016 14:39:33	42.1	21.8	18	47.1	40.4	25.5	1614	20.3	3.8	18	654
02.06.2016 14:39:39	36.4	20.6	15.7	41.4	35.4	23.7	1620	15.8	4.9	15.7
02.06.2016 14:39:45	54.3	27.4	20.7	55	50.6	32.5	1626	26.9	6.7	20.7
02.06.2016 14:39:51	53.8	25.3	18.9	58.8	51.8	31.1	1632	28.5	6.4	18.9
02.06.2016 14:39:57	38.9	22	18.3	38.9	38.2	26.7	1638	16.9	3.7	18.3
02.06.2016 14:40:03	48.4	21.3	18.9	49.1	44.5	25.8	1644	27.1	2.4	18.9
02.06.2016 14:40:09	63.2	35.8	23	162.8	67	43.7	1650	27.4	12.8	23
02.06.2016 14:40:15	76.8	22.2	17.7	104.1	76	28.5	1656	54.6	4.5	17.7
02.06.2016 14:40:21	66.2	28.2	21.8	71.9	60.9	33.4	1662	38	6.4	21.8
02.06.2016 14:40:27	62.1	29.6	19.4	63.1	56.5	33.8	1668	32.5	10.2	19.4
02.06.2016 14:40:33	48.3	27	20.8	53.3	47.2	32.2	1674	21.3	6.2	20.8
02.06.2016 14:40:39	67.7	25.2	18.8	110.9	69.9	31.3	1680	42.5	6.4	18.8
02.06.2016 14:40:45	28.1	17.2	15.8	85.8	33.8	18.6	1686	10.9	1.4	15.8
02.06.2016 14:40:51	51.4	24.3	18	61.4	48.8	27.8	1692	27.1	6.3	18
02.06.2016 14:40:57	46.1	24.2	19.7	126.1	59.9	28.1	1698	21.9	4.5	19.7
02.06.2016 14:41:03	18.6	18.6	17.5	18.6	18.6	18.6	1704	0	1.1	17.5
02.06.2016 14:41:09	37.2	23.1	18.5	58.8	43.3	26.8	1710	14.1	4.6	18.5
02.06.2016 14:41:15	31.9	17.5	16.9	32.2	29.4	19.1	1716	14.4	0.6	16.9
02.06.2016 14:41:21	22.5	19.3	17.4	22.5	22.4	20.7	1722	3.2	1.9	17.4
02.06.2016 14:41:27	34.8	21.8	19.6	34.8	33.6	24.5	1728	13	2.2	19.6
02.06.2016 14:41:33	32.5	21.1	18.4	32.5	31.5	23.7	1734	11.4	2.7	18.4
02.06.2016 14:41:39	41.1	26	20.3	62.7	46.7	29.4	1740	15.1	5.7	20.3
02.06.2016 14:41:45	35.7	25.9	23.3	210.4	56	28.9	1746	9.8	2.6	23.3
02.06.2016 14:41:51	34.1	21.8	18.7	133.7	38.6	24.9	1752	12.3	3.1	18.7
02.06.2016 14:41:57	26.3	22.1	19.5	26.3	26.2	23.3	1758	4.2	2.6	19.5
02.06.2016 14:42:03	41.4	18.7	18.3	46.4	39	21.5	1764	22.7	0.4	18.3
02.06.2016 14:42:09	26.9	20.1	17.8	26.9	26.1	21.4	1770	6.8	2.3	17.8
02.06.2016 14:42:15	46.3	18.7	17.8	56.6	42.3	19.8	1776	27.6	0.9	17.8
02.06.2016 14:42:21	34.9	21.2	16.6	94	47.6	23.4	1782	13.7	4.6	16.6
02.06.2016 14:42:27	29.6	19	17.1	34.6	28.8	20.5	1788	10.6	1.9	17.1
02.06.2016 14:42:33	30.7	18	16.1	30.7	29.7	20.9	1794	12.7	1.9	16.1
02.06.2016 14:42:39	26.7	18.8	17.9	26.7	26.3	20.6	1800	7.9	0.9	17.9
02.06.2016 14:42:45	28.1	19.8	18.4	49.7	34.3	21.7	1806	8.3	1.4	18.4
02.06.2016 14:42:51	28.2	20.9	18.3	28.2	27.8	23.1	1812	7.3	2.6	18.3
02.06.2016 14:42:57	27.1	21.1	18.2	27.1	26.9	23	1818	6	2.9	18.2
02.06.2016 14:43:03	47.8	19	17	70.5	48.7	21.4	1824	28.8	2	17
02.06.2016 14:43:09	38.4	26.3	19.1	38.7	36.7	28.6	1830	12.1	7.2	19.1
02.06.2016 14:43:15	36	20.7	19	36	34.8	24.1	1836	15.3	1.7	19
02.06.2016 14:43:21	37.9	19	17.5	86	48.6	19.8	1842	18.9	1.5	17.5
02.06.2016 14:43:27	26.5	17.4	15.9	26.9	24.9	18.7	1848	9.1	1.5	15.9
02.06.2016 14:43:33	32	21.5	17	32	31.7	25	1854	10.5	4.5	17
02.06.2016 14:43:39	34.3	17.5	16.9	39.6	31.8	18.7	1860	16.8	0.6	16.9
02.06.2016 14:43:45	39.6	19.2	18.6	44.9	37	22	1866	20.4	0.6	18.6
02.06.2016 14:43:51	37.3	18.7	17.5	37.6	34.6	21.4	1872	18.6	1.2	17.5
02.06.2016 14:43:57	30.2	16.8	15.4	35.2	29.1	18.5	1878	13.4	1.4	15.4
02.06.2016 14:44:03	16.8	16.7	15.4	16.8	16.8	16.7	1884	0.1	1.3	15.4
02.06.2016 14:44:09	25.4	17.1	15.7	63	32.3	18.8	1890	8.3	1.4	15.7
02.06.2016 14:44:15	25	17.1	16.1	62.5	31.8	18.5	1896	7.9	1	16.1
02.06.2016 14:44:21	42.1	21.2	17.8	64	45.4	23.5	1902	20.9	3.4	17.8
02.06.2016 14:44:27	25.5	17.3	15.9	25.8	23.9	18.2	1908	8.2	1.4	15.9
02.06.2016 14:44:33	24.1	19	15.9	45.7	30.7	20.5	1914	5.1	3.1	15.9
02.06.2016 14:44:39	37.2	17.5	16.1	63.8	42.4	20.2	1920	19.7	1.4	16.1
02.06.2016 14:44:45	18.6	15.6	15.3	18.6	18.6	17	1926	3	0.3	15.3
02.06.2016 14:44:51	27.5	17.5	14.3	27.5	26.6	20.2	1932	10	3.2	14.3
02.06.2016 14:44:57	21.9	19	17.6	21.9	21.9	20.3	1938	2.9	1.4	17.6
02.06.2016 14:45:03	23.6	17.5	16.2	23.6	23.4	19.1	1944	6.1	1.3	16.2
02.06.2016 14:45:09	30.8	21.3	20.6	30.8	29.8	23.1	1950	9.5	0.7	20.6
02.06.2016 14:45:15	35.8	22.9	20.1	40.8	34.8	25	1956	12.9	2.8	20.1
02.06.2016 14:45:21	49.2	24.8	22.9	236	49.5	27.9	1962	24.4	1.9	22.9
02.06.2016 14:45:27	35.3	24	19.8	40.3	34.5	25.8	1968	11.3	4.2	19.8
02.06.2016 14:45:33	36.7	20.5	20.1	63.3	41.8	21.7	1974	16.2	0.4	20.1
02.06.2016 14:45:39	27.4	19.2	17.1	27.4	27	21.5	1980	8.2	2.1	17.1
02.06.2016 14:45:45	32.2	17.9	17.8	37.2	30.6	19.3	1986	14.3	0.1	17.8
02.06.2016 14:45:51	32	23.2	20.7	131.6	36.5	25.1	1992	8.8	2.5	20.7
02.06.2016 14:45:57	36.8	19.1	17.6	94.8	41.4	22.3	1998	17.7	1.5	17.6
02.06.2016 14:46:03	31.3	24.4	18.1	31.3	30.5	25.7	2004	6.9	6.3	18.1
02.06.2016 14:46:09	27.4	21.4	18.3	27.4	27	23.1	2010	6	3.1	18.3
02.06.2016 14:46:15	27.3	18.4	17.3	32.3	26.5	19.2	2016	8.9	1.1	17.3
02.06.2016 14:46:21	39.5	17.5	15.3	44.8	36.2	19.6	2022	22	2.2	15.3
02.06.2016 14:46:27	24.9	16.8	14.8	29.9	24.1	17.2	2028	8.1	2	14.8
02.06.2016 14:46:33	40.7	20.5	18.2	41.4	36.5	22	2034	20.2	2.3	18.2
02.06.2016 14:46:39	23	16.4	16.3	23	22.7	18.2	2040	6.6	0.1	16.3
02.06.2016 14:46:45	17.3	17.3	16.2	17.3	17.3	17.3	2046	0	1.1	16.2
02.06.2016 14:46:51	30	18.3	15.7	129.9	33.2	19.7	2052	11.7	2.6	15.7
02.06.2016 14:46:57	31.9	19.7	17.8	36.8	30.9	21.1	2058	12.2	1.9	17.8
02.06.2016 14:47:03	16.5	16.5	16.5	16.5	16.5	16.5	2064	0	0	16.5
02.06.2016 14:47:09	28.3	16.2	14.8	28.6	26.5	18.1	2070	12.1	1.4	14.8
02.06.2016 14:47:15	34.6	15.9	15.1	82.8	46.1	18	2076	18.7	0.8	15.1
02.06.2016 14:47:21	24.8	20.8	17.8	83.9	39	21.8	2082	4	3	17.8
02.06.2016 14:47:27	26.6	20.4	20	26.6	26.2	22.1	2088	6.2	0.4	20
02.06.2016 14:47:33	31	19.4	16.4	31.4	29.1	20.9	2094	11.6	3	16.4
02.06.2016 14:47:39	21.7	18.3	16.1	21.7	21.6	19.5	2100	3.4	2.2	16.1
02.06.2016 14:47:45	28.4	21.4	18.9	28.4	27.6	22.8	2106	7	2.5	18.9
02.06.2016 14:47:51	26.8	19	18.3	64.3	34.1	21.1	2112	7.8	0.7	18.3
02.06.2016 14:47:57	21.6	16.6	16.2	21.6	21.5	18.1	2118	5	0.4	16.2
02.06.2016 14:48:03	37.6	21.1	20	97.4	48.6	22.2	2124	16.5	1.1	20
02.06.2016 14:48:09	21.9	21	20.3	21.9	21.9	21.4	2130	0.9	0.7	20.3
02.06.2016 14:48:15	24.7	17.5	15.7	24.7	24.5	20	2136	7.2	1.8	15.7
02.06.2016 14:48:21	32.9	17.3	15.6	38.3	30.5	18.3	2142	15.6	1.7	15.6
02.06.2016 14:48:27	21.7	17.3	16.1	21.7	21.4	18.2	2148	4.4	1.2	16.1
02.06.2016 14:48:33	39.2	19.4	17.1	44.6	36.7	21.9	2154	19.8	2.3	17.1
02.06.2016 14:48:39	20.5	16.3	15.9	42.1	26.8	16.7	2160	4.2	0.4	15.9
02.06.2016 14:48:45	21.9	17.5	16	59.4	29.5	19.1	2166	4.4	1.5	16
02.06.2016 14:48:51	42.4	23.4	18.3	52.3	40.6	25	2172	19	5.1	18.3
02.06.2016 14:48:57	21.5	16.2	15.3	21.5	21.4	18.2	2178	5.3	0.9	15.3
02.06.2016 14:49:03	21	17.3	16	78.6	27.8	18.6	2184	3.7	1.3	16
02.06.2016 14:49:09	27.3	23.9	21.9	27.3	27.2	25	2190	3.4	2	21.9
02.06.2016 14:49:15	16	16	15.5	16	16	16	2196	0	0.5	15.5
02.06.2016 14:49:21	29.1	19.5	17.9	29.4	27.4	20.7	2202	9.6	1.6	17.9
02.06.2016 14:49:27	25.8	22	20.4	25.8	25.5	22.7	2208	3.8	1.6	20.4
02.06.2016 14:49:33	20.1	17	15.8	20.1	20	18	2214	3.1	1.2	15.8
02.06.2016 14:49:39	17	16.9	16.3	17	17	17	2220	0.1	0.6	16.3
02.06.2016 14:49:45	17.7	15.9	15.6	117.3	22.8	16.7	2226	1.8	0.3	15.6
02.06.2016 14:49:51	23.1	16.3	15.8	61	29.2	16.6	2232	6.8	0.5	15.8
02.06.2016 14:49:57	32.9	18.6	16.2	37.8	31.7	20.7	2238	14.3	2.4	16.2
02.06.2016 14:50:03	19.3	17.4	16.3	19.3	19.3	18.2	2244	1.9	1.1	16.3
02.06.2016 14:50:09	28.1	17	13.6	33.1	27.3	18.7	2250	11.1	3.4	13.6
02.06.2016 14:50:15	16.4	16.4	16.1	16.4	16.4	16.4	2256	0	0.3	16.1
02.06.2016 14:50:21	24.3	22.9	21.3	24.3	24.3	23.6	2262	1.4	1.6	21.3
02.06.2016 14:50:27	40.6	22.9	21.2	45.6	38.8	25.1	2268	17.7	1.7	21.2

## Sheet: 9OS
date & time	PM10 [ug/m3]	PM2,5 [ug/m3]	PM1 [ug/m3]	Inhalable [ug/m3]	Thoracic [ug/m3]	Alveolic [ug/m3]	Zeit in sek	2.5 bis 10	1 bis 2.5	kleiner 1
03.06.2016 09:05:37	9	9	8.9	9	9	9	6	0	0.1	8.9		Sägedauer	78			Temperature [°C]	Humidity [%rH]
03.06.2016 09:05:43	18	9	7.8	23	17.1	9.8	12	9	1.2	7.8						24	52.39
03.06.2016 09:05:49	13.6	8.9	8.3	13.6	12.8	9.3	18	4.7	0.6	8.3						24	52.39
03.06.2016 09:05:55	9.3	9.2	8.7	9.3	9.3	9.3	24	0.1	0.5	8.7						23.9	52.7
03.06.2016 09:06:01	9.6	8.9	8.2	9.6	9.6	9.3	30	0.7	0.7	8.2						23.71	53.02
03.06.2016 09:06:07	12.9	8.4	8	12.9	12.8	9.7	36	4.5	0.4	8						23.71	53.44
03.06.2016 09:06:13	7.6	7.6	7.6	7.6	7.6	7.6	42	0	0	7.6						23.61	53.44
03.06.2016 09:06:19	9.8	9.5	8.3	9.8	9.8	9.6	48	0.3	1.2	8.3						23.52	53.54
03.06.2016 09:06:25	9	9	8.7	9	9	9	54	0	0.3	8.7						23.52	53.75
03.06.2016 09:06:31	17	11.5	8.7	17	16.7	13	60	5.5	2.8	8.7						23.52	54.17
03.06.2016 09:06:37	14.2	10.4	9.2	35.8	20.8	11.6	66	3.8	1.2	9.2						23.42	54.17
03.06.2016 09:06:43	14.5	9.4	8.3	14.5	14.1	10.3	72	5.1	1.1	8.3						23.42	54.69
03.06.2016 09:06:49	10.8	10.2	9.1	10.8	10.8	10.5	78	0.6	1.1	9.1						23.33	54.69
03.06.2016 09:06:55	11.4	11.3	10	11.4	11.4	11.3	84	0.1	1.3	10						23.33	54.79
03.06.2016 09:07:01	18.1	9.5	7.8	18.5	16.4	10.2	90	8.6	1.7	7.8						23.23	55.11
03.06.2016 09:07:07	9.9	9	8.3	9.9	9.9	9.4	96	0.9	0.7	8.3						23.23	55.21
03.06.2016 09:07:13	12.1	9.5	8	12.1	12	10.3	102	2.6	1.5	8						23.23	55.52
03.06.2016 09:07:19	13.4	12	9.5	13.4	13.4	12.6	108	1.4	2.5	9.5						23.23	55.63
03.06.2016 09:07:25	21.3	11.3	10.3	21.3	20.1	12.6	114	10	1	10.3						23.23	55.84
03.06.2016 09:07:31	8.4	8.4	8.3	8.4	8.4	8.4	120	0	0.1	8.3						23.23	55.94
03.06.2016 09:07:37	19.9	13.6	11.2	19.9	19.5	15	126	6.3	2.4	11.2						23.23	56.05
03.06.2016 09:07:43	14.9	13	11.6	14.9	14.8	13.4	132	1.9	1.4	11.6						23.14	56.25
03.06.2016 09:07:49	9.9	9.9	9.8	9.9	9.9	9.9	138	0	0.1	9.8						23.23	56.46
03.06.2016 09:07:55	14	12.9	12	14	14	13.4	144	1.1	0.9	12						23.23	56.36
03.06.2016 09:08:01	15.7	15.2	13.1	15.7	15.7	15.4	150	0.5	2.1	13.1						23.23	56.15
03.06.2016 09:08:07	23	14.6	12.4	27.9	22.1	15.1	156	8.4	2.2	12.4						23.23	55.52
03.06.2016 09:08:13	18.2	13.4	12.5	18.2	17.8	14.1	162	4.8	0.9	12.5						23.23	55.73
03.06.2016 09:08:19	13.7	13.6	13.1	13.7	13.7	13.6	168	0.1	0.5	13.1						23.23	55.52
03.06.2016 09:08:25	13	12.2	11	13	13	12.5	174	0.8	1.2	11						23.23	55.42
03.06.2016 09:08:31	11.5	11.5	11.4	11.5	11.5	11.5	180	0	0.1	11.4						23.23	55.63
03.06.2016 09:08:37	16.9	12.2	11.2	16.9	16.1	12.6	186	4.7	1	11.2						23.23	55.52
03.06.2016 09:08:43	13.9	11.2	10.8	13.9	13.9	12.1	192	2.7	0.4	10.8						23.33	55.42
03.06.2016 09:08:49	8	8	7.9	8	8	8	198	0	0.1	7.9						23.33	54.58
03.06.2016 09:08:55	18.6	15.7	11.7	18.6	18.6	17	204	2.9	4	11.7						23.33	53.96
03.06.2016 09:09:01	13.3	13.1	11.9	13.3	13.3	13.2	210	0.2	1.2	11.9						23.33	53.33
03.06.2016 09:09:07	12.8	12.3	10.7	12.8	12.8	12.5	216	0.5	1.6	10.7						23.33	52.29
03.06.2016 09:09:13	13	11.4	10.7	34.6	19.6	11.6	222	1.6	0.7	10.7						23.33	51.03
03.06.2016 09:09:19	13.8	12.6	11.8	13.8	13.8	13.2	228	1.2	0.8	11.8						23.33	51.24
03.06.2016 09:09:25	13.2	12.5	10.8	13.2	13.2	12.8	234	0.7	1.7	10.8						23.33	51.45
03.06.2016 09:09:31	9.3	8.6	7.8	9.3	9.3	8.9	240	0.7	0.8	7.8						23.33	52.18
03.06.2016 09:09:37	17.8	12.7	11.2	17.8	17	13.3	246	5.1	1.5	11.2						23.42	52.91
03.06.2016 09:09:43	7.5	7.5	7.5	7.5	7.5	7.5	252	0	0	7.5						23.42	53.02
03.06.2016 09:09:49	10.3	9.3	8.8	10.3	10.3	9.7	258	1	0.5	8.8						23.42	53.44
03.06.2016 09:09:55	10.5	9.2	7.5	10.5	10.5	9.8	264	1.3	1.7	7.5						23.52	53.75
03.06.2016 09:10:01	9.5	9.5	9.5	9.5	9.5	9.5	270	0	0	9.5						23.52	54.27
03.06.2016 09:10:07	19.6	11.5	10.1	19.9	18	12.4	276	8.1	1.4	10.1						23.61	54.69
03.06.2016 09:10:13	11.7	11.7	11.5	11.7	11.7	11.7	282	0	0.2	11.5						23.61	54.69
03.06.2016 09:10:19	18.5	10.3	10	18.9	16.9	11.2	288	8.2	0.3	10						23.61	55
03.06.2016 09:10:25	15.4	13.8	11.8	73.1	22.3	14.5	294	1.6	2	11.8						23.71	55.11
03.06.2016 09:10:31	8.2	8.2	8	8.2	8.2	8.2	300	0	0.2	8						23.71	55.21
03.06.2016 09:10:37	8.7	8.7	8.2	8.7	8.7	8.7	306	0	0.5	8.2						23.71	55.11
03.06.2016 09:10:43	15.6	10.1	8.5	15.6	14.8	10.8	312	5.5	1.6	8.5						23.81	55.11
03.06.2016 09:10:49	7.7	7.7	7.7	7.7	7.7	7.7	318	0	0	7.7						23.81	55.21
03.06.2016 09:10:55	9	9	8.5	9	9	9	324	0	0.5	8.5						23.81	54.9
03.06.2016 09:11:01	17.7	11.8	9.1	17.7	16.9	12.7	330	5.9	2.7	9.1						23.81	54.9
03.06.2016 09:11:07	11.9	9.8	9.2	11.9	11.8	10.4	336	2.1	0.6	9.2						23.9	55.11
03.06.2016 09:11:13	8.6	8.6	8.1	8.6	8.6	8.6	342	0	0.5	8.1						23.9	55
03.06.2016 09:11:19	10	10	9.7	10	10	10	348	0	0.3	9.7						23.9	55.11
03.06.2016 09:11:25	10.2	8.6	7.6	10.2	10.2	9.3	354	1.6	1	7.6						24	55.21
03.06.2016 09:11:31	20.1	11.4	9.8	20.4	18.4	12.2	360	8.7	1.6	9.8						24	55
03.06.2016 09:11:37	9.2	9.1	8.7	9.2	9.2	9.2	366	0.1	0.4	8.7						24	55
03.06.2016 09:11:43	26.2	11.7	9.3	48.2	30.3	12.9	372	14.5	2.4	9.3						24	54.9
03.06.2016 09:11:49	17.8	9.6	8.2	61	30.6	10.9	378	8.2	1.4	8.2						24.09	54.79
03.06.2016 09:11:55	17.4	11.2	10.6	39	23.2	11.8	384	6.2	0.6	10.6						24.09	54.79
03.06.2016 09:12:01	19	11.1	9.7	24	18.2	11.4	390	7.9	1.4	9.7						24.09	54.79
03.06.2016 09:12:07	14	12.6	10.6	14	14	13.2	396	1.4	2	10.6						24.09	54.27
03.06.2016 09:12:13	16.3	11.5	9.6	16.3	15.9	12.6	402	4.8	1.9	9.6						24.19	53.96
03.06.2016 09:12:19	10.1	10.1	9.8	10.1	10.1	10.1	408	0	0.3	9.8						24.19	53.23
03.06.2016 09:12:25	12.8	12.7	11.8	12.8	12.8	12.8	414	0.1	0.9	11.8						24.19	52.39
03.06.2016 09:12:31	11	11	10.9	11	11	11	420	0	0.1	10.9						24.19	51.87
03.06.2016 09:12:37	11.4	9.9	8.7	11.4	11.4	10.6	426	1.5	1.2	8.7						24.19	49.89
03.06.2016 09:12:43	13.1	12.6	10.8	13.1	13.1	12.8	432	0.5	1.8	10.8						24.19	48.53
03.06.2016 09:12:49	10.6	10.5	9.8	10.6	10.6	10.6	438	0.1	0.7	9.8						24.19	48.84
03.06.2016 09:12:55	11.2	11	10.2	11.2	11.2	11.1	444	0.2	0.8	10.2						24.19	49.57
03.06.2016 09:13:01	14.1	11.1	10.5	35.7	20.7	12	450	3	0.6	10.5						24.19	51.14
03.06.2016 09:13:07	10.9	10.9	10.8	10.9	10.9	10.9	456	0	0.1	10.8						24.19	51.03
03.06.2016 09:13:13	15.4	13.3	12.1	15.4	15.3	13.9	462	2.1	1.2	12.1						24.19	51.66
03.06.2016 09:13:19	11.9	11.9	11.7	11.9	11.9	11.9	468	0	0.2	11.7						24.19	51.97
03.06.2016 09:13:25	11.3	11.3	11.3	11.3	11.3	11.3	474	0	0	11.3						24.19	52.5
03.06.2016 09:13:31	21.4	11.8	11.1	21.4	19.8	12.6	480	9.6	0.7	11.1						24.19	52.91
03.06.2016 09:13:37	22.5	12.9	10.5	22.5	20.9	13.7	486	9.6	2.4	10.5						24.19	53.12
03.06.2016 09:13:43	13.6	13.1	11.7	13.6	13.6	13.3	492	0.5	1.4	11.7						24.19	53.54
03.06.2016 09:13:49	11.4	11.4	11.2	11.4	11.4	11.4	498	0	0.2	11.2						24.19	53.64
03.06.2016 09:13:55	20.1	13.3	12.3	20.4	18.5	13.6	504	6.8	1	12.3						24.19	53.96
03.06.2016 09:14:01	13.8	12.9	11	13.8	13.8	13.3	510	0.9	1.9	11						24.19	53.75
03.06.2016 09:14:07	14.9	13.9	13.1	14.9	14.9	14.3	516	1	0.8	13.1						24.19	54.27
03.06.2016 09:14:13	14.1	12.1	11	14.1	14	12.6	522	2	1.1	11						24.19	54.37
03.06.2016 09:14:19	11.1	11.1	10.5	11.1	11.1	11.1	528	0	0.6	10.5						24.29	54.37
03.06.2016 09:14:25	12.1	12.1	11.6	12.1	12.1	12.1	534	0	0.5	11.6						24.29	54.17
03.06.2016 09:14:31	15.3	11.4	9.6	15.3	15.2	12.4	540	3.9	1.8	9.6						24.29	54.27
03.06.2016 09:14:37	26.1	10.9	10.1	26.4	23.5	12.4	546	15.2	0.8	10.1						24.29	53.33
03.06.2016 09:14:43	25.1	12.2	11.1	30.1	23.9	13.7	552	12.9	1.1	11.1						24.19	53.23
03.06.2016 09:14:49	15.7	10.8	10.1	15.7	15	11.3	558	4.9	0.7	10.1						24.29	52.7
03.06.2016 09:14:55	17.4	13.5	12.2	17.4	17.1	14.2	564	3.9	1.3	12.2						24.19	52.18
03.06.2016 09:15:01	10.9	10.9	10.8	10.9	10.9	10.9	570	0	0.1	10.8						24.19	50.62
03.06.2016 09:15:07	14.6	12.9	12.2	14.6	14.6	13.6	576	1.7	0.7	12.2						24.19	49.26
03.06.2016 09:15:13	13.3	13.3	12.5	13.3	13.3	13.3	582	0	0.8	12.5						24.19	48.42
03.06.2016 09:15:19	12.9	12.6	11.8	12.9	12.9	12.7	588	0.3	0.8	11.8
03.06.2016 09:15:25	20.7	13.6	12.9	20.7	19.8	14.7	594	7.1	0.7	12.9
03.06.2016 09:15:31	21.6	20.1	18	43.2	28.2	20.3	600	1.5	2.1	18
03.06.2016 09:15:37	21.3	8.5	8.5	21.7	19.3	10.1	606	12.8	0	8.5
03.06.2016 09:15:43	9.5	9.5	9.3	9.5	9.5	9.5	612	0	0.2	9.3
03.06.2016 09:15:49	12.8	12.7	12.2	12.8	12.8	12.8	618	0.1	0.5	12.2
03.06.2016 09:15:55	14.7	14.2	13	14.7	14.7	14.4	624	0.5	1.2	13
03.06.2016 09:16:01	15.9	15.1	12.6	15.9	15.9	15.4	630	0.8	2.5	12.6
03.06.2016 09:16:07	26.6	21.9	21.2	26.6	25.8	22.3	636	4.7	0.7	21.2
03.06.2016 09:16:13	23	12.9	12.6	27.9	22	13.8	642	10.1	0.3	12.6
03.06.2016 09:16:19	18.8	10.9	9.2	76.5	25.3	12.7	648	7.9	1.7	9.2
03.06.2016 09:16:25	12.8	11.2	10.1	12.8	12.8	11.9	654	1.6	1.1	10.1
03.06.2016 09:16:31	23.4	16.2	15.7	23.4	22.5	17.3	660	7.2	0.5	15.7
03.06.2016 09:16:37	35.7	27.6	23.9	36	34.1	28.5	666	8.1	3.7	23.9
03.06.2016 09:16:43	21	11.7	10	63.5	27.9	12.7	672	9.3	1.7	10
03.06.2016 09:16:49	13.4	13.4	13.3	13.4	13.4	13.4	678	0	0.1	13.3
03.06.2016 09:16:55	16.7	16.6	15.7	16.7	16.7	16.7	684	0.1	0.9	15.7
03.06.2016 09:17:01	18	16.5	12.3	18	18	17.1	690	1.5	4.2	12.3
03.06.2016 09:17:07	15.8	15.8	15.6	15.8	15.8	15.8	696	0	0.2	15.6
03.06.2016 09:17:13	19.6	19.6	19.6	19.6	19.6	19.6	702	0	0	19.6
03.06.2016 09:17:19	32.4	31.6	28.6	32.4	32.4	32	708	0.8	3	28.6
03.06.2016 09:17:25	36.4	28.8	28	41.4	35.6	28.9	714	7.6	0.8	28
03.06.2016 09:17:31	57	41.4	39.9	57.7	53.7	42.9	720	15.6	1.5	39.9
03.06.2016 09:17:37	39.6	19	18.2	49.5	37.1	20	726	20.6	0.8	18.2
03.06.2016 09:17:43	36.1	27.4	26.4	36.4	34.4	28.5	732	8.7	1	26.4
03.06.2016 09:17:49	26.8	21.4	21	84.4	32.9	22.1	738	5.4	0.4	21
03.06.2016 09:17:55	20.1	20.1	19.6	20.1	20.1	20.1	744	0	0.5	19.6
03.06.2016 09:18:01	27.1	25.3	20.6	27.1	27.1	26.1	750	1.8	4.7	20.6
03.06.2016 09:18:07	32.1	23.1	21.3	32.4	30.4	24	756	9	1.8	21.3
03.06.2016 09:18:13	29.6	29.5	28.9	29.6	29.6	29.5	762	0.1	0.6	28.9
03.06.2016 09:18:19	29.2	24.1	22.8	29.2	28.4	24.6	768	5.1	1.3	22.8
03.06.2016 09:18:25	34.3	31.2	29	34.3	34.3	32.6	774	3.1	2.2	29
03.06.2016 09:18:31	21.8	21.7	21.1	21.8	21.8	21.8	780	0.1	0.6	21.1
03.06.2016 09:18:37	22.5	22.5	22.4	22.5	22.5	22.5	786	0	0.1	22.4
03.06.2016 09:18:43	30.7	17.8	17	31	28.3	19.1	792	12.9	0.8	17
03.06.2016 09:18:49	22.8	18.6	18.1	22.8	22.5	19.5	798	4.2	0.5	18.1
03.06.2016 09:18:55	19.2	17.4	15	118.8	24.4	18.2	804	1.8	2.4	15
03.06.2016 09:19:01	19.5	19.5	19.3	19.5	19.5	19.5	810	0	0.2	19.3
03.06.2016 09:19:07	20.4	17.9	15.9	20.4	20.4	19	816	2.5	2	15.9
03.06.2016 09:19:13	20.1	20.1	19.6	20.1	20.1	20.1	822	0	0.5	19.6
03.06.2016 09:19:19	24	24	23.8	24	24	24	828	0	0.2	23.8
03.06.2016 09:19:25	32	29.3	26.4	32	31.9	30.1	834	2.7	2.9	26.4
03.06.2016 09:19:31	30	20.8	18.1	35	29.2	21.7	840	9.2	2.7	18.1
03.06.2016 09:19:37	49.4	35.5	33.2	50.1	46.1	36.2	846	13.9	2.3	33.2
03.06.2016 09:19:43	28.1	23.8	21.8	28.1	28	25.4	852	4.3	2	21.8
03.06.2016 09:19:49	24.6	24.6	24.1	24.6	24.6	24.6	858	0	0.5	24.1
03.06.2016 09:19:55	26.2	17.4	16.9	31.2	25.4	18.1	864	8.8	0.5	16.9
03.06.2016 09:20:01	20.4	20.1	19.3	20.4	20.4	20.2	870	0.3	0.8	19.3
03.06.2016 09:20:07	21.8	21.8	21.4	21.8	21.8	21.8	876	0	0.4	21.4
03.06.2016 09:20:13	38.4	29.5	28.8	60.3	43.3	30.3	882	8.9	0.7	28.8
03.06.2016 09:20:19	22.7	20.7	19	22.7	22.7	21.6	888	2	1.7	19
03.06.2016 09:20:25	20.1	18.7	16.4	20.1	20	19.3	894	1.4	2.3	16.4
03.06.2016 09:20:31	16.8	16.8	16.7	16.8	16.8	16.8	900	0	0.1	16.7
03.06.2016 09:20:37	16.5	16.5	16.5	16.5	16.5	16.5	906	0	0	16.5
03.06.2016 09:20:43	17.5	13.6	13	17.5	17.2	14.3	912	3.9	0.6	13
03.06.2016 09:20:49	11.8	11.8	11.7	11.8	11.8	11.8	918	0	0.1	11.7
03.06.2016 09:20:55	18.5	15.7	14.6	18.5	18.5	16.6	924	2.8	1.1	14.6
03.06.2016 09:21:01	23.1	16.1	14.5	23.5	21.5	16.5	930	7	1.6	14.5
03.06.2016 09:21:07	20.9	15.7	13.7	78.5	27	16.3	936	5.2	2	13.7
03.06.2016 09:21:13	14.2	14.2	14.2	14.2	14.2	14.2	942	0	0	14.2
03.06.2016 09:21:19	21.2	21.2	21.1	21.2	21.2	21.2	948	0	0.1	21.1
03.06.2016 09:21:25	20.5	18.1	16.4	20.5	20.5	18.8	954	2.4	1.7	16.4
03.06.2016 09:21:31	21.3	13	12.7	21.7	19.7	14	960	8.3	0.3	12.7
03.06.2016 09:21:37	13.1	13.1	13	13.1	13.1	13.1	966	0	0.1	13
03.06.2016 09:21:43	15	15	14.9	15	15	15	972	0	0.1	14.9
03.06.2016 09:21:49	15.8	15.8	15.5	15.8	15.8	15.8	978	0	0.3	15.5
03.06.2016 09:21:55	20.3	13.3	12.6	20.6	18.7	13.7	984	7	0.7	12.6
03.06.2016 09:22:01	73.5	64.2	59.4	78.5	72.7	65.2	990	9.3	4.8	59.4
03.06.2016 09:22:07	20.7	20.7	20.2	20.7	20.7	20.7	996	0	0.5	20.2
03.06.2016 09:22:13	24	23.2	21.4	24	24	23.6	1002	0.8	1.8	21.4
03.06.2016 09:22:19	15.5	15.5	15.2	15.5	15.5	15.5	1008	0	0.3	15.2
03.06.2016 09:22:25	14.8	14.8	14.5	14.8	14.8	14.8	1014	0	0.3	14.5
03.06.2016 09:22:31	17.9	16.9	16.3	17.9	17.9	17.4	1020	1	0.6	16.3
03.06.2016 09:22:37	14.1	14.1	14.1	14.1	14.1	14.1	1026	0	0	14.1
03.06.2016 09:22:43	18.8	18.8	18.8	18.8	18.8	18.8	1032	0	0	18.8
03.06.2016 09:22:49	21.6	18.1	17.6	21.6	21.3	18.7	1038	3.5	0.5	17.6
03.06.2016 09:22:55	27.9	27.4	26.5	27.9	27.9	27.6	1044	0.5	0.9	26.5
03.06.2016 09:23:01	29.7	29.3	28.2	29.7	29.7	29.5	1050	0.4	1.1	28.2
03.06.2016 09:23:07	35.5	29.5	28	35.5	35.2	31.2	1056	6	1.5	28
03.06.2016 09:23:13	20.6	20.6	20.6	20.6	20.6	20.6	1062	0	0	20.6
03.06.2016 09:23:19	14	14	14	14	14	14	1068	0	0	14
03.06.2016 09:23:25	23.5	21.4	20.7	45.1	30.1	21.9	1074	2.1	0.7	20.7
03.06.2016 09:23:31	25.3	24.1	23.5	25.3	25.3	24.6	1080	1.2	0.6	23.5
03.06.2016 09:23:37	23.6	23	20.3	23.6	23.6	23.3	1086	0.6	2.7	20.3
03.06.2016 09:23:43	22.2	18.2	16.8	22.2	21.8	18.9	1092	4	1.4	16.8
03.06.2016 09:23:49	19.2	16.9	15.8	19.2	19.2	17.6	1098	2.3	1.1	15.8
03.06.2016 09:23:55	19.5	19.4	18.3	19.5	19.5	19.5	1104	0.1	1.1	18.3
03.06.2016 09:24:01	30.8	21.3	20	35.8	30	22.3	1110	9.5	1.3	20
03.06.2016 09:24:07	22.1	22.1	21.9	22.1	22.1	22.1	1116	0	0.2	21.9
03.06.2016 09:24:13	40.7	18.1	18	110.1	51.7	18.5	1122	22.6	0.1	18
03.06.2016 09:24:19	19.3	19.3	19.2	19.3	19.3	19.3	1128	0	0.1	19.2
03.06.2016 09:24:25	20	19.9	19.3	20	20	19.9	1134	0.1	0.6	19.3
03.06.2016 09:24:31	31.9	21.1	19.9	36.9	30.8	21.7	1140	10.8	1.2	19.9
03.06.2016 09:24:37	22	21.4	19.3	22	22	21.6	1146	0.6	2.1	19.3
03.06.2016 09:24:43	18	18	17.9	18	18	18	1152	0	0.1	17.9
03.06.2016 09:24:49	15.5	15.5	14.9	15.5	15.5	15.5	1158	0	0.6	14.9
03.06.2016 09:24:55	22.1	14.2	13.6	27.1	21.3	14.5	1164	7.9	0.6	13.6
03.06.2016 09:25:01	14.6	14.5	13.6	14.6	14.6	14.5	1170	0.1	0.9	13.6
03.06.2016 09:25:07	14.3	14.3	13.7	14.3	14.3	14.3	1176	0	0.6	13.7
03.06.2016 09:25:13	27.7	18.2	17.8	54.3	33.5	18.8	1182	9.5	0.4	17.8
03.06.2016 09:25:19	18	17.4	16	18	18	17.7	1188	0.6	1.4	16
03.06.2016 09:25:25	16.3	16.3	16.2	16.3	16.3	16.3	1194	0	0.1	16.2
03.06.2016 09:25:31	18.8	18.8	18.1	18.8	18.8	18.8	1200	0	0.7	18.1
03.06.2016 09:25:37	22.5	21.7	20.3	22.5	22.5	22.1	1206	0.8	1.4	20.3
03.06.2016 09:25:43	24.2	17.7	16.9	45.8	30.7	19.4	1212	6.5	0.8	16.9
03.06.2016 09:25:49	17.1	17.1	17.1	17.1	17.1	17.1	1218	0	0	17.1
03.06.2016 09:25:55	17.1	16.1	14.5	17.1	17.1	16.6	1224	1	1.6	14.5
03.06.2016 09:26:01	14.3	14.3	14.3	14.3	14.3	14.3	1230	0	0	14.3
03.06.2016 09:26:07	20.4	12.7	12	25.3	19.5	12.9	1236	7.7	0.7	12
03.06.2016 09:26:13	12.4	12.4	12.4	12.4	12.4	12.4	1242	0	0	12.4
03.06.2016 09:26:19	17	17	16.7	17	17	17	1248	0	0.3	16.7
03.06.2016 09:26:25	11.5	11.5	11.4	11.5	11.5	11.5	1254	0	0.1	11.4
03.06.2016 09:26:31	16.2	15.3	12.6	16.2	16.2	15.7	1260	0.9	2.7	12.6
03.06.2016 09:26:37	18.1	18	17.3	18.1	18.1	18.1	1266	0.1	0.7	17.3
03.06.2016 09:26:43	11	11	10.9	11	11	11	1272	0	0.1	10.9
03.06.2016 09:26:49	12.3	11.1	9.8	12.3	12.3	11.6	1278	1.2	1.3	9.8
03.06.2016 09:26:55	10	10	9.9	10	10	10	1284	0	0.1	9.9
03.06.2016 09:27:01	12.5	12.5	12	12.5	12.5	12.5	1290	0	0.5	12
03.06.2016 09:27:07	13.5	13.5	13.5	13.5	13.5	13.5	1296	0	0	13.5
03.06.2016 09:27:13	13.7	13.7	13.7	13.7	13.7	13.7	1302	0	0	13.7
03.06.2016 09:27:19	18.7	18.7	18.3	18.7	18.7	18.7	1308	0	0.4	18.3
03.06.2016 09:27:25	17.4	16.5	14.4	17.4	17.3	16.9	1314	0.9	2.1	14.4
03.06.2016 09:27:31	18.9	17.4	14.9	18.9	18.9	18.1	1320	1.5	2.5	14.9
03.06.2016 09:27:37	26.7	19	18.1	31.7	25.9	19.2	1326	7.7	0.9	18.1
03.06.2016 09:27:43	18.3	16.9	14.9	18.3	18.3	17.5	1332	1.4	2	14.9
03.06.2016 09:27:49	16.4	16.4	15.9	16.4	16.4	16.4	1338	0	0.5	15.9
03.06.2016 09:27:55	16.1	15.1	14.5	16.1	16	15.5	1344	1	0.6	14.5
03.06.2016 09:28:01	13.8	13.8	13.8	13.8	13.8	13.8	1350	0	0	13.8
03.06.2016 09:28:07	22.8	16.6	16.3	22.8	22	17.6	1356	6.2	0.3	16.3
03.06.2016 09:28:13	21.5	12.6	12.2	48	27.2	12.9	1362	8.9	0.4	12.2
03.06.2016 09:28:19	15.8	14.3	12.4	15.8	15.8	15	1368	1.5	1.9	12.4
03.06.2016 09:28:25	16.3	14.2	13	16.3	16.2	14.8	1374	2.1	1.2	13
03.06.2016 09:28:31	22.8	12.9	11.1	27.7	21.9	13.7	1380	9.9	1.8	11.1
03.06.2016 09:28:37	18.6	15.2	14.2	18.6	18.3	15.7	1386	3.4	1	14.2
03.06.2016 09:28:43	21.3	12.6	12.2	26.2	20.4	13.2	1392	8.7	0.4	12.2
03.06.2016 09:28:49	15.5	14.6	13	15.5	15.4	15	1398	0.9	1.6	13
03.06.2016 09:28:55	11	10.9	10.4	11	11	10.9	1404	0.1	0.5	10.4
03.06.2016 09:29:01	19.1	12.5	11.2	19.1	18.2	13.3	1410	6.6	1.3	11.2
03.06.2016 09:29:07	10.5	10.5	10.5	10.5	10.5	10.5	1416	0	0	10.5
03.06.2016 09:29:13	14.4	12.4	11.8	14.4	14.3	13	1422	2	0.6	11.8
03.06.2016 09:29:19	13	13	13	13	13	13	1428	0	0	13
03.06.2016 09:29:25	13.1	13.1	12.9	13.1	13.1	13.1	1434	0	0.2	12.9
03.06.2016 09:29:31	16.7	16.6	16.2	16.7	16.7	16.7	1440	0.1	0.4	16.2
03.06.2016 09:29:37	19.9	19.3	18.4	19.9	19.9	19.5	1446	0.6	0.9	18.4
03.06.2016 09:29:43	19	19	18.9	19	19	19	1452	0	0.1	18.9
03.06.2016 09:29:49	24.4	17.2	15.3	24.8	22.8	17.7	1458	7.2	1.9	15.3
03.06.2016 09:29:55	31	20.2	18.5	31.4	29.3	21.6	1464	10.8	1.7	18.5
03.06.2016 09:30:01	39.8	22.7	18.2	49.8	38.2	23.9	1470	17.1	4.5	18.2
03.06.2016 09:30:07	18	17.9	16.9	18	18	18	1476	0.1	1	16.9
03.06.2016 09:30:13	27.9	24.3	20.9	27.9	27.8	25.5	1482	3.6	3.4	20.9
03.06.2016 09:30:19	23	22.4	20.5	23	23	22.7	1488	0.6	1.9	20.5
03.06.2016 09:30:25	20.2	20.2	19.6	20.2	20.2	20.2	1494	0	0.6	19.6
03.06.2016 09:30:31	23.9	21.7	19.9	23.9	23.8	22.3	1500	2.2	1.8	19.9
03.06.2016 09:30:37	20.2	19.2	18.2	20.2	20.2	19.7	1506	1	1	18.2
03.06.2016 09:30:43	16.1	16.1	16.1	16.1	16.1	16.1	1512	0	0	16.1
03.06.2016 09:30:49	29.2	24.5	22.8	50.8	35.7	25.7	1518	4.7	1.7	22.8
03.06.2016 09:30:55	24.1	21.6	18.9	24.1	24	22.3	1524	2.5	2.7	18.9
03.06.2016 09:31:01	20	18.8	17.3	20	20	19.3	1530	1.2	1.5	17.3
03.06.2016 09:31:07	20.7	20.7	20.5	20.7	20.7	20.7	1536	0	0.2	20.5
03.06.2016 09:31:13	25.8	21	18.7	25.8	25.7	22.7	1542	4.8	2.3	18.7
03.06.2016 09:31:19	23.9	21.7	18.9	23.9	23.9	22.7	1548	2.2	2.8	18.9
03.06.2016 09:31:25	16.3	16.2	15.6	16.3	16.3	16.2	1554	0.1	0.6	15.6
03.06.2016 09:31:31	18	18	17.5	18	18	18	1560	0	0.5	17.5
03.06.2016 09:31:37	38.1	28.7	26.4	64.7	43.9	29.2	1566	9.4	2.3	26.4
03.06.2016 09:31:43	29.7	27.2	26.7	29.7	29.7	28.3	1572	2.5	0.5	26.7
03.06.2016 09:31:49	31.1	29.5	25.2	31.1	31.1	30.2	1578	1.6	4.3	25.2
03.06.2016 09:31:55	31.2	26.1	22.3	31.2	31.1	28	1584	5.1	3.8	22.3
03.06.2016 09:32:01	16.8	16	15.2	16.8	16.8	16.4	1590	0.8	0.8	15.2
03.06.2016 09:32:07	14.5	14.5	14.2	14.5	14.5	14.4	1596	0	0.3	14.2
03.06.2016 09:32:13	27.4	26.2	22.9	27.4	27.4	26.8	1602	1.2	3.3	22.9
03.06.2016 09:32:19	20.7	17.2	16.5	20.7	20.6	18	1608	3.5	0.7	16.5
03.06.2016 09:32:25	13.9	13.9	13.1	13.9	13.9	13.9	1614	0	0.8	13.1
03.06.2016 09:32:31	13.2	13.2	13	13.2	13.2	13.2	1620	0	0.2	13
03.06.2016 09:32:37	27.1	24.1	21.3	27.1	27	25.1	1626	3	2.8	21.3
03.06.2016 09:32:43	26	20.7	19.3	26	25.6	21.7	1632	5.3	1.4	19.3
03.06.2016 09:32:49	26.2	19.6	19.1	26.2	26	21.5	1638	6.6	0.5	19.1
03.06.2016 09:32:55	22.9	22.8	21.9	22.9	22.9	22.9	1644	0.1	0.9	21.9
03.06.2016 09:33:01	24.4	21.4	20.1	24.4	24.4	22.4	1650	3	1.3	20.1
03.06.2016 09:33:07	22.2	17.5	16.9	22.2	22.1	18.9	1656	4.7	0.6	16.9
03.06.2016 09:33:13	19.3	18	16.2	19.3	19.3	18.6	1662	1.3	1.8	16.2
03.06.2016 09:33:19	15.4	15.3	14.8	15.4	15.4	15.3	1668	0.1	0.5	14.8
03.06.2016 09:33:25	14.1	14.1	14	14.1	14.1	14.1	1674	0	0.1	14
03.06.2016 09:33:31	23.4	14.9	14.6	23.8	21.8	16	1680	8.5	0.3	14.6
03.06.2016 09:33:37	17.8	15.7	15.2	17.8	17.8	16.7	1686	2.1	0.5	15.2
03.06.2016 09:33:43	20	20	19.3	20	20	20	1692	0	0.7	19.3
03.06.2016 09:33:49	21.4	19.6	17.6	21.4	21.4	20.4	1698	1.8	2	17.6
03.06.2016 09:33:55	17.5	17.5	17.5	17.5	17.5	17.5	1704	0	0	17.5
03.06.2016 09:34:01	17.4	16.5	13.6	17.4	17.4	16.9	1710	0.9	2.9	13.6
03.06.2016 09:34:07	18.1	17.4	15.3	18.1	18.1	17.7	1716	0.7	2.1	15.3
03.06.2016 09:34:13	14.5	14.5	14.4	14.5	14.5	14.5	1722	0	0.1	14.4
03.06.2016 09:34:19	22.5	15.5	14.2	22.9	20.9	15.9	1728	7	1.3	14.2
03.06.2016 09:34:25	14.5	14.5	14.3	14.5	14.5	14.5	1734	0	0.2	14.3
03.06.2016 09:34:31	17	16.5	15.3	17	17	16.7	1740	0.5	1.2	15.3
03.06.2016 09:34:37	14.5	14.5	14.5	14.5	14.5	14.5	1746	0	0	14.5
03.06.2016 09:34:43	14.3	14.3	14.3	14.3	14.3	14.3	1752	0	0	14.3
03.06.2016 09:34:49	14.6	14.6	14.3	14.6	14.6	14.6	1758	0	0.3	14.3
03.06.2016 09:34:55	14.5	14.5	14.5	14.5	14.5	14.5	1764	0	0	14.5
03.06.2016 09:35:01	14.4	14.4	14.4	14.4	14.4	14.4	1770	0	0	14.4
03.06.2016 09:35:07	15.4	15.4	15.3	15.4	15.4	15.4	1776	0	0.1	15.3
03.06.2016 09:35:13	14.1	14.1	14.1	14.1	14.1	14.1	1782	0	0	14.1
03.06.2016 09:35:19	14	13.9	13.5	14	14	14	1788	0.1	0.4	13.5
03.06.2016 09:35:25	18.2	14.9	14.5	18.2	18.1	16	1794	3.3	0.4	14.5
03.06.2016 09:35:31	15	15	14.8	15	15	15	1800	0	0.2	14.8
03.06.2016 09:35:37	16.1	16.1	15.9	16.1	16.1	16.1	1806	0	0.2	15.9
03.06.2016 09:35:43	14.5	14.5	14.3	14.5	14.5	14.5	1812	0	0.2	14.3
03.06.2016 09:35:49	18.5	17.6	14.7	18.5	18.5	18	1818	0.9	2.9	14.7
03.06.2016 09:35:55	17.9	17.9	17.4	17.9	17.9	17.9	1824	0	0.5	17.4
03.06.2016 09:36:01	15.6	15.3	14.2	15.6	15.6	15.4	1830	0.3	1.1	14.2
03.06.2016 09:36:07	13.9	13.9	13.9	13.9	13.9	13.9	1836	0	0	13.9
03.06.2016 09:36:13	14.5	14.5	14.4	14.5	14.5	14.5	1842	0	0.1	14.4
03.06.2016 09:36:19	14.7	14.7	14.5	14.7	14.7	14.7	1848	0	0.2	14.5
03.06.2016 09:36:25	16.3	16.1	15.3	16.3	16.3	16.2	1854	0.2	0.8	15.3
03.06.2016 09:36:31	15.5	15.5	15.1	15.5	15.5	15.5	1860	0	0.4	15.1
03.06.2016 09:36:37	25.4	16.3	15.9	25.7	23.7	17.2	1866	9.1	0.4	15.9
03.06.2016 09:36:43	12.3	12.3	12.3	12.3	12.3	12.3	1872	0	0	12.3
03.06.2016 09:36:49	13.3	12.8	11.3	13.3	13.3	13	1878	0.5	1.5	11.3
03.06.2016 09:36:55	16.6	16.6	16.3	16.6	16.6	16.6	1884	0	0.3	16.3
03.06.2016 09:37:01	20.6	20.3	19.1	20.6	20.6	20.4	1890	0.3	1.2	19.1
03.06.2016 09:37:07	29.8	21.2	19.9	30.2	28.1	22	1896	8.6	1.3	19.9
03.06.2016 09:37:13	26.6	25.6	22.5	26.6	26.6	26	1902	1	3.1	22.5
03.06.2016 09:37:19	19.4	18.3	17.3	19.4	19.4	18.8	1908	1.1	1	17.3
03.06.2016 09:37:25	24.7	22.5	21.7	46.3	31.3	23	1914	2.2	0.8	21.7
03.06.2016 09:37:31	19.8	17.4	15.6	19.8	19.7	18.1	1920	2.4	1.8	15.6
03.06.2016 09:37:37	20.5	20.5	20.4	20.5	20.5	20.5	1926	0	0.1	20.4
03.06.2016 09:37:43	18.6	18.6	18	18.6	18.6	18.6	1932	0	0.6	18
03.06.2016 09:37:49	20.7	19.3	17.7	20.7	20.7	19.9	1938	1.4	1.6	17.7
03.06.2016 09:37:55	30.2	20.6	19.1	35.2	29.4	21.6	1944	9.6	1.5	19.1
03.06.2016 09:38:01	20.1	20.1	20	20.1	20.1	20.1	1950	0	0.1	20
03.06.2016 09:38:07	28.1	24.2	23.5	28.1	28	25.6	1956	3.9	0.7	23.5
03.06.2016 09:38:13	18	17.8	16.2	18	18	17.9	1962	0.2	1.6	16.2
03.06.2016 09:38:19	16.9	16.8	16.3	16.9	16.9	16.9	1968	0.1	0.5	16.3
03.06.2016 09:38:25	18.1	15.9	14.9	39.7	24.7	16.4	1974	2.2	1	14.9
03.06.2016 09:38:31	28.1	15.3	14.9	28.4	25.8	16.2	1980	12.8	0.4	14.9
03.06.2016 09:38:37	17	15.1	14.5	17	17	15.6	1986	1.9	0.6	14.5
03.06.2016 09:38:43	14.7	14.7	14.3	14.7	14.7	14.7	1992	0	0.4	14.3
03.06.2016 09:38:49	11.8	11.7	11.3	11.8	11.8	11.7	1998	0.1	0.4	11.3
03.06.2016 09:38:55	11	11	11	11	11	11	2004	0	0	11
03.06.2016 09:39:01	17.2	15.5	12.8	17.2	17.1	16.2	2010	1.7	2.7	12.8
03.06.2016 09:39:07	9.7	9.7	9.7	9.7	9.7	9.7	2016	0	0	9.7
03.06.2016 09:39:13	16.4	15.9	15.2	16.4	16.4	16.2	2022	0.5	0.7	15.2
03.06.2016 09:39:19	15.2	15	14.1	15.2	15.2	15.1	2028	0.2	0.9	14.1
03.06.2016 09:39:25	12	11.9	11.4	12	12	11.9	2034	0.1	0.5	11.4
03.06.2016 09:39:31	11.6	11.6	11.2	11.6	11.6	11.6	2040	0	0.4	11.2
03.06.2016 09:39:37	12.5	12.5	12.5	12.5	12.5	12.5	2046	0	0	12.5
03.06.2016 09:39:43	12.4	12.4	12.3	12.4	12.4	12.4	2052	0	0.1	12.3
03.06.2016 09:39:49	25.4	15.4	14.6	25.8	23.7	16.4	2058	10	0.8	14.6
03.06.2016 09:39:55	13	13	12.8	13	13	13	2064	0	0.2	12.8
03.06.2016 09:40:01	14.9	14.6	13.9	14.9	14.9	14.8	2070	0.3	0.7	13.9
03.06.2016 09:40:07	14.3	14.2	13.7	14.3	14.3	14.2	2076	0.1	0.5	13.7
03.06.2016 09:40:13	13.4	13.4	13.4	13.4	13.4	13.4	2082	0	0	13.4
03.06.2016 09:40:19	16	15	14.4	16	16	15.4	2088	1	0.6	14.4
03.06.2016 09:40:25	17.2	16.5	15.8	17.2	17.2	16.8	2094	0.7	0.7	15.8
03.06.2016 09:40:31	13.3	13.3	13.3	13.3	13.3	13.3	2100	0	0	13.3
03.06.2016 09:40:37	21.4	14.4	13.2	21.8	19.8	14.8	2106	7	1.2	13.2
03.06.2016 09:40:43	13.1	13.1	13.1	13.1	13.1	13.1	2112	0	0	13.1
03.06.2016 09:40:49	14.5	14.5	14.5	14.5	14.5	14.5	2118	0	0	14.5
03.06.2016 09:40:55	15	15	15	15	15	15	2124	0	0	15
03.06.2016 09:41:01	20.5	19.4	15.6	20.5	20.5	19.9	2130	1.1	3.8	15.6
03.06.2016 09:41:07	14.3	14.2	13.7	14.3	14.3	14.2	2136	0.1	0.5	13.7
03.06.2016 09:41:13	14.7	14.4	13.4	14.7	14.7	14.5	2142	0.3	1	13.4
03.06.2016 09:41:19	16	15.5	13.9	16	16	15.7	2148	0.5	1.6	13.9
03.06.2016 09:41:25	19.1	14.2	13.2	114.3	33.3	15	2154	4.9	1	13.2
03.06.2016 09:41:31	18.2	17.7	15.8	18.2	18.2	17.9	2160	0.5	1.9	15.8
03.06.2016 09:41:37	14.7	14.6	14.2	14.7	14.7	14.7	2166	0.1	0.4	14.2
03.06.2016 09:41:43	13.2	13.2	12.9	13.2	13.2	13.2	2172	0	0.3	12.9
03.06.2016 09:41:49	15.6	15.3	14.5	15.6	15.6	15.4	2178	0.3	0.8	14.5
03.06.2016 09:41:55	15	14.8	13.8	15	15	14.9	2184	0.2	1	13.8
03.06.2016 09:42:01	14.5	14.5	14.5	14.5	14.5	14.5	2190	0	0	14.5
03.06.2016 09:42:07	12.2	12.2	12.1	12.2	12.2	12.2	2196	0	0.1	12.1
03.06.2016 09:42:13	12.2	12.2	11.9	12.2	12.2	12.2	2202	0	0.3	11.9
03.06.2016 09:42:19	12.9	12.8	12.4	12.9	12.9	12.8	2208	0.1	0.4	12.4
03.06.2016 09:42:25	10.7	10.7	10.7	10.7	10.7	10.7	2214	0	0	10.7
03.06.2016 09:42:31	14.7	14	11.9	14.7	14.7	14.3	2220	0.7	2.1	11.9
03.06.2016 09:42:37	13.8	13.8	13.1	13.8	13.8	13.8	2226	0	0.7	13.1
03.06.2016 09:42:43	19.1	13.6	12.1	19.1	18.3	14.3	2232	5.5	1.5	12.1
03.06.2016 09:42:49	11.3	11.3	11.3	11.3	11.3	11.3	2238	0	0	11.3
03.06.2016 09:42:55	12.3	12.3	12.2	12.3	12.3	12.3	2244	0	0.1	12.2
03.06.2016 09:43:01	22.3	14.1	11.7	27.2	21.4	14.5	2250	8.2	2.4	11.7
03.06.2016 09:43:07	23.7	14.8	12.7	24.1	22.1	16.1	2256	8.9	2.1	12.7
03.06.2016 09:43:13	11.5	11.5	11.4	11.5	11.5	11.5	2262	0	0.1	11.4
03.06.2016 09:43:19	18.6	14.9	13.5	18.6	18.5	16.2	2268	3.7	1.4	13.5
03.06.2016 09:43:25	20.6	15.6	14.8	20.6	20.3	16.5	2274	5	0.8	14.8
03.06.2016 09:43:31	19.7	18.2	15.3	19.7	19.7	18.9	2280	1.5	2.9	15.3
03.06.2016 09:43:37	14.1	14.1	13.5	14.1	14.1	14.1	2286	0	0.6	13.5
03.06.2016 09:43:43	18.6	16.7	14.8	40.2	25.2	17.1	2292	1.9	1.9	14.8
03.06.2016 09:43:49	15.2	15.2	15.1	15.2	15.2	15.2	2298	0	0.1	15.1
03.06.2016 09:43:55	14.4	14.4	14.4	14.4	14.4	14.4	2304	0	0	14.4
03.06.2016 09:44:01	14.9	13.9	13.2	14.9	14.9	14.3	2310	1	0.7	13.2
03.06.2016 09:44:07	16.6	12.9	10.7	38.2	23.1	13.7	2316	3.7	2.2	10.7
03.06.2016 09:44:13	11.3	11.3	11.2	11.3	11.3	11.3	2322	0	0.1	11.2
03.06.2016 09:44:19	15.5	14.5	13.6	15.5	15.5	14.9	2328	1	0.9	13.6
03.06.2016 09:44:25	24.4	16.4	14.9	29.4	23.5	16.7	2334	8	1.5	14.9
03.06.2016 09:44:31	26.6	21.2	17.9	48.1	33.1	22.8	2340	5.4	3.3	17.9
03.06.2016 09:44:37	17.8	15.7	14.5	17.8	17.7	16.3	2346	2.1	1.2	14.5
03.06.2016 09:44:43	22.8	19.9	17.1	22.8	22.8	21.2	2352	2.9	2.8	17.1
03.06.2016 09:44:49	20	15.6	14.3	20	19.7	16.6	2358	4.4	1.3	14.3
03.06.2016 09:44:55	15.7	14.1	12.3	37.3	22.3	14.4	2364	1.6	1.8	12.3
03.06.2016 09:45:01	12.6	12.6	12.1	12.6	12.6	12.6	2370	0	0.5	12.1
03.06.2016 09:45:07	28.5	13.5	12.3	33.4	26.8	15.2	2376	15	1.2	12.3
03.06.2016 09:45:13	15.9	12.7	11.1	15.9	15.8	13.8	2382	3.2	1.6	11.1
03.06.2016 09:45:19	11	11	10.9	11	11	11	2388	0	0.1	10.9
03.06.2016 09:45:25	13.9	12.5	10.9	13.9	13.9	13.2	2394	1.4	1.6	10.9
03.06.2016 09:45:31	18.1	11.1	10.3	18.4	16.5	11.5	2400	7	0.8	10.3
03.06.2016 09:45:37	11.2	11.2	11.2	11.2	11.2	11.2	2406	0	0	11.2
03.06.2016 09:45:43	16.6	13.9	13.4	16.6	16.5	14.8	2412	2.7	0.5	13.4
03.06.2016 09:45:49	22.4	15	13.1	22.7	20.8	15.5	2418	7.4	1.9	13.1
03.06.2016 09:45:55	14.1	14	13	14.1	14.1	14.1	2424	0.1	1	13
03.06.2016 09:46:01	25.3	10.9	10.7	30.3	23.6	12	2430	14.4	0.2	10.7
03.06.2016 09:46:07	15.4	12.2	11.1	37	22	12.8	2436	3.2	1.1	11.1
03.06.2016 09:46:13	12.6	12.5	12.1	12.6	12.6	12.6	2442	0.1	0.4	12.1
03.06.2016 09:46:19	13.6	13.5	12.6	13.6	13.6	13.5	2448	0.1	0.9	12.6
03.06.2016 09:46:25	22.7	14.2	13.9	23	21	15.2	2454	8.5	0.3	13.9
03.06.2016 09:46:31	18.5	16.2	14.4	18.5	18.4	16.8	2460	2.3	1.8	14.4
03.06.2016 09:46:37	18.5	15.9	13.8	40.1	25.1	16.6	2466	2.6	2.1	13.8
03.06.2016 09:46:43	21.7	14.5	12.3	59.5	27.7	15	2472	7.2	2.2	12.3
03.06.2016 09:46:49	14.6	14.5	13.5	14.6	14.6	14.5	2478	0.1	1	13.5
03.06.2016 09:46:55	12.5	12.5	12.4	12.5	12.5	12.5	2484	0	0.1	12.4
03.06.2016 09:47:01	16	14.8	13.9	16	16	15.3	2490	1.2	0.9	13.9
03.06.2016 09:47:07	16.4	13.5	12.3	16.4	16.4	14.8	2496	2.9	1.2	12.3
03.06.2016 09:47:13	13.6	13.5	13.1	13.6	13.6	13.6	2502	0.1	0.4	13.1
03.06.2016 09:47:19	16.3	12.4	11.5	16.3	16	13.1	2508	3.9	0.9	11.5
03.06.2016 09:47:25	16.5	12.2	11.2	16.5	16.2	13.1	2514	4.3	1	11.2
03.06.2016 09:47:31	13.8	12.7	12	13.8	13.8	13.2	2520	1.1	0.7	12
03.06.2016 09:47:37	14.3	13.3	12.4	14.3	14.3	13.8	2526	1	0.9	12.4
03.06.2016 09:47:43	12.7	12.7	12.4	12.7	12.7	12.7	2532	0	0.3	12.4
03.06.2016 09:47:49	12.2	12.2	11.9	12.2	12.2	12.2	2538	0	0.3	11.9
03.06.2016 09:47:55	12	12	12	12	12	12	2544	0	0	12
03.06.2016 09:48:01	13.6	13.4	12.3	13.6	13.6	13.4	2550	0.2	1.1	12.3
03.06.2016 09:48:07	12.7	12.7	12.3	12.7	12.7	12.7	2556	0	0.4	12.3
03.06.2016 09:48:13	17.6	16.4	12.5	17.6	17.6	16.9	2562	1.2	3.9	12.5
03.06.2016 09:48:19	12.1	12.1	12.1	12.1	12.1	12.1	2568	0	0	12.1
03.06.2016 09:48:25	15	12.4	11.9	15	14.9	13.2	2574	2.6	0.5	11.9
03.06.2016 09:48:31	15.9	13.9	12.1	15.9	15.9	14.4	2580	2	1.8	12.1
03.06.2016 09:48:37	11.8	11.8	11.7	11.8	11.8	11.8	2586	0	0.1	11.7
03.06.2016 09:48:43	13.2	12.9	11.8	13.2	13.2	13.1	2592	0.3	1.1	11.8
03.06.2016 09:48:49	14	13	12.4	14	13.9	13.4	2598	1	0.6	12.4
03.06.2016 09:48:55	22.4	14.3	12.4	27.4	21.6	14.7	2604	8.1	1.9	12.4
03.06.2016 09:49:01	16.2	12.8	11.7	16.2	15.9	13.3	2610	3.4	1.1	11.7
03.06.2016 09:49:07	18.4	13.5	13.2	118	23.4	14.9	2616	4.9	0.3	13.2
03.06.2016 09:49:13	19.8	13.8	12	19.8	19	14.8	2622	6	1.8	12
03.06.2016 09:49:19	12.5	12.5	12.3	12.5	12.5	12.5	2628	0	0.2	12.3
03.06.2016 09:49:25	23.2	14.4	11.7	28.1	22.3	15.1	2634	8.8	2.7	11.7
03.06.2016 09:49:31	12.2	12.2	12.2	12.2	12.2	12.2	2640	0	0	12.2
03.06.2016 09:49:37	15.4	12.3	11.7	15.4	15.1	12.7	2646	3.1	0.6	11.7
03.06.2016 09:49:43	13.5	13.5	13.4	13.5	13.5	13.5	2652	0	0.1	13.4
03.06.2016 09:49:49	12.1	12.1	12.1	12.1	12.1	12.1	2658	0	0	12.1
03.06.2016 09:49:55	14.1	13.8	12.9	14.1	14.1	13.9	2664	0.3	0.9	12.9
03.06.2016 09:50:01	14.3	14.3	13.8	14.3	14.3	14.3	2670	0	0.5	13.8
03.06.2016 09:50:07	13.8	13.8	13.3	13.8	13.8	13.8	2676	0	0.5	13.3
03.06.2016 09:50:13	13.8	13.8	13.8	13.8	13.8	13.8	2682	0	0	13.8
03.06.2016 09:50:19	15.9	15.9	14.9	15.9	15.9	15.9	2688	0	1	14.9
03.06.2016 09:50:25	16.7	14.7	13.6	16.7	16.6	15.2	2694	2	1.1	13.6
03.06.2016 09:50:31	15.6	15.1	13.8	15.6	15.6	15.3	2700	0.5	1.3	13.8
03.06.2016 09:50:37	14.2	14.1	13.5	14.2	14.2	14.2	2706	0.1	0.6	13.5
03.06.2016 09:50:43	15.5	15.1	14.1	15.5	15.5	15.3	2712	0.4	1	14.1
03.06.2016 09:50:49	13.2	13.1	12.7	13.2	13.2	13.2	2718	0.1	0.4	12.7
03.06.2016 09:50:55	15.7	15.3	13.8	15.7	15.7	15.4	2724	0.4	1.5	13.8
03.06.2016 09:51:01	13	13	12.4	13	13	13	2730	0	0.6	12.4
03.06.2016 09:51:07	17.8	14	13.6	39.4	24.3	14.9	2736	3.8	0.4	13.6
03.06.2016 09:51:13	16.1	15	13.7	16.1	16	15.5	2742	1.1	1.3	13.7
03.06.2016 09:51:19	16.4	14.2	12.9	16.4	16.4	15.2	2748	2.2	1.3	12.9
03.06.2016 09:51:25	20.3	12.7	12.1	25.3	19.5	12.9	2754	7.6	0.6	12.1
03.06.2016 09:51:31	12.4	12.4	12.2	12.4	12.4	12.4	2760	0	0.2	12.2
03.06.2016 09:51:37	13.4	13.4	13.4	13.4	13.4	13.4	2766	0	0	13.4
03.06.2016 09:51:43	12.9	12.9	12.1	12.9	12.9	12.9	2772	0	0.8	12.1
03.06.2016 09:51:49	12.7	12.7	12.2	12.7	12.7	12.7	2778	0	0.5	12.2
03.06.2016 09:51:55	16.1	15.8	15.1	16.1	16.1	15.9	2784	0.3	0.7	15.1
03.06.2016 09:52:01	15	15	15	15	15	15	2790	0	0	15
03.06.2016 09:52:07	14.8	13.8	12.7	14.8	14.8	14.2	2796	1	1.1	12.7
03.06.2016 09:52:13	15.2	15	14.5	72.9	22.1	15.1	2802	0.2	0.5	14.5
03.06.2016 09:52:19	12.9	12.6	11.9	12.9	12.9	12.7	2808	0.3	0.7	11.9
03.06.2016 09:52:25	11.8	11.8	11.6	11.8	11.8	11.8	2814	0	0.2	11.6
03.06.2016 09:52:31	13.4	12.2	11	13.4	13.4	12.8	2820	1.2	1.2	11
03.06.2016 09:52:37	14.1	14.1	13.7	14.1	14.1	14	2826	0	0.4	13.7
03.06.2016 09:52:43	22.4	13.2	12.5	22.8	20.7	14.2	2832	9.2	0.7	12.5
03.06.2016 09:52:49	21	13.2	12.5	79	26.3	14	2838	7.8	0.7	12.5
03.06.2016 09:52:55	11.4	11.4	11.4	11.4	11.4	11.4	2844	0	0	11.4
03.06.2016 09:53:01	11.6	11.6	11.1	11.6	11.6	11.6	2850	0	0.5	11.1
03.06.2016 09:53:07	11.5	11.5	11.4	11.5	11.5	11.5	2856	0	0.1	11.4
03.06.2016 09:53:13	12.6	12.6	12	12.6	12.6	12.6	2862	0	0.6	12
03.06.2016 09:53:19	13.5	13	12.3	13.5	13.5	13.2	2868	0.5	0.7	12.3
03.06.2016 09:53:25	15.7	13.1	12.4	15.7	15.6	13.9	2874	2.6	0.7	12.4
03.06.2016 09:53:31	11.6	11.6	11.4	11.6	11.6	11.6	2880	0	0.2	11.4
03.06.2016 09:53:37	20.1	12.1	11.5	25	19.2	12.4	2886	8	0.6	11.5
03.06.2016 09:53:43	19.5	12	11.5	19.9	17.9	12.6	2892	7.5	0.5	11.5
03.06.2016 09:53:49	15.2	13.4	12.7	52.7	22.8	13.8	2898	1.8	0.7	12.7
03.06.2016 09:53:55	12.9	12.9	12.9	12.9	12.9	12.9	2904	0	0	12.9
03.06.2016 09:54:01	15.7	14.9	13.3	15.7	15.7	15.3	2910	0.8	1.6	13.3
03.06.2016 09:54:07	12.3	12.3	12.1	12.3	12.3	12.3	2916	0	0.2	12.1
03.06.2016 09:54:13	11.4	11.4	11.4	11.4	11.4	11.4	2922	0	0	11.4
03.06.2016 09:54:19	15.8	13.4	12.2	15.8	15.7	14.1	2928	2.4	1.2	12.2
03.06.2016 09:54:25	14.5	14.5	14.4	14.5	14.5	14.5	2934	0	0.1	14.4
03.06.2016 09:54:31	18.1	17.3	15.6	18.1	18.1	17.7	2940	0.8	1.7	15.6
03.06.2016 09:54:37	36.8	19.1	17	42.1	34	20	2946	17.7	2.1	17
03.06.2016 09:54:43	14.9	13.9	13.4	14.9	14.9	14.3	2952	1	0.5	13.4
03.06.2016 09:54:49	12.9	12.9	12.8	12.9	12.9	12.9	2958	0	0.1	12.8
03.06.2016 09:54:55	12.5	12.1	10.7	12.5	12.5	12.3	2964	0.4	1.4	10.7
03.06.2016 09:55:01	12.7	12.7	12.7	12.7	12.7	12.7	2970	0	0	12.7
03.06.2016 09:55:07	15.7	14.7	13.7	15.7	15.6	15.1	2976	1	1	13.7
03.06.2016 09:55:13	16.2	16.1	15.6	16.2	16.2	16.1	2982	0.1	0.5	15.6
03.06.2016 09:55:19	20.6	18.8	17.1	42.2	27.2	19.2	2988	1.8	1.7	17.1
03.06.2016 09:55:25	27.7	17.5	15.8	54.3	33.5	18.4	2994	10.2	1.7	15.8
03.06.2016 09:55:31	18.1	17.1	16.2	18.1	18.1	17.5	3000	1	0.9	16.2
03.06.2016 09:55:37	15.3	14.5	12.4	15.3	15.3	14.8	3006	0.8	2.1	12.4
03.06.2016 09:55:43	17.9	15.8	15.2	39.5	24.5	16.2	3012	2.1	0.6	15.2
03.06.2016 09:55:49	13	13	13	13	13	13	3018	0	0	13
03.06.2016 09:55:55	21.6	16.3	13.3	21.6	20.8	16.9	3024	5.3	3	13.3
03.06.2016 09:56:01	15.6	13.6	12.9	15.6	15.5	14.1	3030	2	0.7	12.9
03.06.2016 09:56:07	12.2	12.1	11.6	12.2	12.2	12.1	3036	0.1	0.5	11.6
03.06.2016 09:56:13	17.6	15	12.4	17.6	17.5	15.8	3042	2.6	2.6	12.4
03.06.2016 09:56:19	11.2	11.1	10.7	11.2	11.2	11.1	3048	0.1	0.4	10.7
03.06.2016 09:56:25	13.5	13.2	12.1	13.5	13.5	13.3	3054	0.3	1.1	12.1
03.06.2016 09:56:31	12.4	11.9	11.2	12.4	12.4	12.1	3060	0.5	0.7	11.2
03.06.2016 09:56:37	10.7	10.7	10.4	10.7	10.7	10.7	3066	0	0.3	10.4
03.06.2016 09:56:43	11.9	11.7	11	11.9	11.9	11.8	3072	0.2	0.7	11
03.06.2016 09:56:49	12.1	12.1	12.1	12.1	12.1	12.1	3078	0	0	12.1
03.06.2016 09:56:55	11.9	11.9	11.5	11.9	11.9	11.9	3084	0	0.4	11.5
03.06.2016 09:57:01	11.8	11.8	11.5	11.8	11.8	11.8	3090	0	0.3	11.5
03.06.2016 09:57:07	15.4	15.4	15.4	15.4	15.4	15.4	3096	0	0	15.4
03.06.2016 09:57:13	13.7	13.7	13.7	13.7	13.7	13.7	3102	0	0	13.7
03.06.2016 09:57:19	13.4	12.5	11.2	13.4	13.4	12.9	3108	0.9	1.3	11.2
03.06.2016 09:57:25	16	14	13.4	16	15.9	14.5	3114	2	0.6	13.4
03.06.2016 09:57:31	17.3	14	12.8	54.9	25	15.2	3120	3.3	1.2	12.8
03.06.2016 09:57:37	13.2	13.2	12.9	13.2	13.2	13.2	3126	0	0.3	12.9
03.06.2016 09:57:43	21.6	13.8	12.2	22	20	14.6	3132	7.8	1.6	12.2
03.06.2016 09:57:49	14	14	13.9	14	14	14	3138	0	0.1	13.9
03.06.2016 09:57:55	14.2	14.2	14.1	14.2	14.2	14.2	3144	0	0.1	14.1
03.06.2016 09:58:01	17.4	14.9	13.4	17.4	17.4	16	3150	2.5	1.5	13.4
03.06.2016 09:58:07	14.9	14.4	13	14.9	14.9	14.6	3156	0.5	1.4	13
03.06.2016 09:58:13	12.5	12.3	11.6	12.5	12.5	12.4	3162	0.2	0.7	11.6
03.06.2016 09:58:19	12	12	11.9	12	12	12	3168	0	0.1	11.9
03.06.2016 09:58:25	11.7	11.7	11.7	11.7	11.7	11.7	3174	0	0	11.7
03.06.2016 09:58:31	20.5	12.8	12	25.5	19.7	13	3180	7.7	0.8	12
03.06.2016 09:58:37	12.8	12.7	12.1	12.8	12.8	12.7	3186	0.1	0.6	12.1
03.06.2016 09:58:43	13.2	12.8	11.9	13.2	13.2	13	3192	0.4	0.9	11.9
03.06.2016 09:58:49	10.9	10.9	10.9	10.9	10.9	10.9	3198	0	0	10.9
03.06.2016 09:58:55	13.8	13.6	12.9	13.8	13.8	13.7	3204	0.2	0.7	12.9
03.06.2016 09:59:01	12.2	12.2	11.7	12.2	12.2	12.1	3210	0	0.5	11.7
03.06.2016 09:59:07	13.9	13.1	11.6	13.9	13.9	13.4	3216	0.8	1.5	11.6
03.06.2016 09:59:13	13.7	11.8	11.3	13.7	13.6	12.3	3222	1.9	0.5	11.3
03.06.2016 09:59:19	14.2	13.1	11.9	14.2	14.1	13.6	3228	1.1	1.2	11.9
03.06.2016 09:59:25	11.9	11.8	11.3	11.9	11.9	11.9	3234	0.1	0.5	11.3
03.06.2016 09:59:31	11.4	11.4	11.4	11.4	11.4	11.4	3240	0	0	11.4
03.06.2016 09:59:37	13	12.6	10.9	13	13	12.7	3246	0.4	1.7	10.9
03.06.2016 09:59:43	11.7	11.7	11.7	11.7	11.7	11.7	3252	0	0	11.7
03.06.2016 09:59:49	10.9	10.9	10.9	10.9	10.9	10.9	3258	0	0	10.9
03.06.2016 09:59:55	13.5	12.2	11	13.5	13.4	12.8	3264	1.3	1.2	11
03.06.2016 10:00:01	14.3	13.3	11.2	14.3	14.3	13.7	3270	1	2.1	11.2
03.06.2016 10:00:07	11.7	11.7	11.7	11.7	11.7	11.7	3276	0	0	11.7
03.06.2016 10:00:13	12.2	12.2	12.1	12.2	12.2	12.2	3282	0	0.1	12.1
03.06.2016 10:00:19	12.5	12.4	11.9	12.5	12.5	12.4	3288	0.1	0.5	11.9
03.06.2016 10:00:25	12.2	12.2	11.6	12.2	12.2	12.2	3294	0	0.6	11.6
03.06.2016 10:00:31	16.6	16.3	14.9	16.6	16.6	16.4	3300	0.3	1.4	14.9
03.06.2016 10:00:37	16.5	15.5	14.9	16.5	16.5	15.9	3306	1	0.6	14.9
03.06.2016 10:00:43	14.1	14.1	14.1	14.1	14.1	14.1	3312	0	0	14.1
03.06.2016 10:00:49	12.7	12.7	12.7	12.7	12.7	12.7	3318	0	0	12.7
03.06.2016 10:00:55	13.1	13	12.6	13.1	13.1	13.1	3324	0.1	0.4	12.6
03.06.2016 10:01:01	18.1	14.8	14.3	39.7	24.7	15.5	3330	3.3	0.5	14.3
03.06.2016 10:01:07	14.7	14.7	14.3	14.7	14.7	14.7	3336	0	0.4	14.3
03.06.2016 10:01:13	14.3	14.3	14.2	14.3	14.3	14.3	3342	0	0.1	14.2
03.06.2016 10:01:19	12.5	12.5	12.5	12.5	12.5	12.5	3348	0	0	12.5
03.06.2016 10:01:25	11.8	11.8	11.8	11.8	11.8	11.8	3354	0	0	11.8
03.06.2016 10:01:31	12	12	12	12	12	12	3360	0	0	12
03.06.2016 10:01:37	12.3	12.3	12.1	12.3	12.3	12.3	3366	0	0.2	12.1
03.06.2016 10:01:43	14.2	13.9	13.2	14.2	14.2	14	3372	0.3	0.7	13.2
03.06.2016 10:01:49	19.2	18	14.1	19.2	19.2	18.5	3378	1.2	3.9	14.1
03.06.2016 10:01:55	12.9	12.8	12.3	12.9	12.9	12.8	3384	0.1	0.5	12.3
03.06.2016 10:02:01	20.8	13.2	12.6	25.8	20	13.4	3390	7.6	0.6	12.6
03.06.2016 10:02:07	10.6	10.6	10.6	10.6	10.6	10.6	3396	0	0	10.6
03.06.2016 10:02:13	13.5	13.4	12.4	13.5	13.5	13.4	3402	0.1	1	12.4
03.06.2016 10:02:19	19.8	12.2	11.7	20.1	18.1	12.8	3408	7.6	0.5	11.7
03.06.2016 10:02:25	12.7	12.7	12.7	12.7	12.7	12.7	3414	0	0	12.7
03.06.2016 10:02:31	11.6	11.6	11.6	11.6	11.6	11.6	3420	0	0	11.6
03.06.2016 10:02:37	13.2	13.1	12.6	13.2	13.2	13.2	3426	0.1	0.5	12.6
03.06.2016 10:02:43	15.5	13.1	11.8	15.5	15.4	13.8	3432	2.4	1.3	11.8
03.06.2016 10:02:49	16.8	15.6	12.9	16.8	16.8	16.1	3438	1.2	2.7	12.9
03.06.2016 10:02:55	12	12	12	12	12	12	3444	0	0	12
03.06.2016 10:03:01	12.4	12.4	12.4	12.4	12.4	12.4	3450	0	0	12.4
03.06.2016 10:03:07	19.2	12.2	11.6	19.6	17.6	12.6	3456	7	0.6	11.6
03.06.2016 10:03:13	11.4	11.4	11.4	11.4	11.4	11.4	3462	0	0	11.4
03.06.2016 10:03:19	14.7	12.9	12.3	14.7	14.6	13.3	3468	1.8	0.6	12.3
03.06.2016 10:03:25	12.7	12.7	12.6	12.7	12.7	12.7	3474	0	0.1	12.6
03.06.2016 10:03:31	12.6	12.6	12.6	12.6	12.6	12.6	3480	0	0	12.6
03.06.2016 10:03:37	11.9	11.9	11.7	11.9	11.9	11.9	3486	0	0.2	11.7
03.06.2016 10:03:43	11.9	11.8	11.4	11.9	11.9	11.9	3492	0.1	0.4	11.4
03.06.2016 10:03:49	11.7	11.7	11.5	11.7	11.7	11.7	3498	0	0.2	11.5
03.06.2016 10:03:55	11.3	11.3	11.3	11.3	11.3	11.3	3504	0	0	11.3
03.06.2016 10:04:01	12.8	12.8	12.8	12.8	12.8	12.8	3510	0	0	12.8
03.06.2016 10:04:07	14.3	14.3	14.3	14.3	14.3	14.3	3516	0	0	14.3
03.06.2016 10:04:13	14.3	14.3	14.1	14.3	14.3	14.3	3522	0	0.2	14.1
03.06.2016 10:04:19	16.8	14.3	13.2	16.8	16.7	15.4	3528	2.5	1.1	13.2
03.06.2016 10:04:25	22.9	15	13.1	27.9	22.1	15.3	3534	7.9	1.9	13.1
03.06.2016 10:04:31	14.8	14.7	14.3	14.8	14.8	14.8	3540	0.1	0.4	14.3
03.06.2016 10:04:37	22.5	13.9	13.5	22.9	20.8	14.7	3546	8.6	0.4	13.5
03.06.2016 10:04:43	13.4	13.4	13	13.4	13.4	13.4	3552	0	0.4	13
03.06.2016 10:04:49	18.5	14.9	13.7	18.5	18.3	15.8	3558	3.6	1.2	13.7
03.06.2016 10:04:55	13.9	13.5	12.1	13.9	13.9	13.7	3564	0.4	1.4	12.1
03.06.2016 10:05:01	17.4	12.6	12.3	17.4	17.2	14	3570	4.8	0.3	12.3
03.06.2016 10:05:07	14.1	13.6	12.9	14.1	14.1	13.8	3576	0.5	0.7	12.9
03.06.2016 10:05:13	13.2	12.2	11.7	13.2	13.2	12.7	3582	1	0.5	11.7
03.06.2016 10:05:19	12.2	12.2	12.2	12.2	12.2	12.2	3588	0	0	12.2
03.06.2016 10:05:25	17.5	15.4	14.1	17.5	17.4	15.9	3594	2.1	1.3	14.1
03.06.2016 10:05:31	13.1	12.8	11.4	13.1	13.1	12.9	3600	0.3	1.4	11.4
03.06.2016 10:05:37	11.8	11.8	11.8	11.8	11.8	11.8	3606	0	0	11.8
03.06.2016 10:05:43	12.3	12.3	12.3	12.3	12.3	12.3	3612	0	0	12.3
03.06.2016 10:05:49	11.7	11.7	11.7	11.7	11.7	11.7	3618	0	0	11.7
03.06.2016 10:05:55	11.9	11.9	11.4	11.9	11.9	11.9	3624	0	0.5	11.4
03.06.2016 10:06:01	13.5	12.9	12.2	13.5	13.5	13.2	3630	0.6	0.7	12.2
03.06.2016 10:06:07	12.7	12.7	12.6	12.7	12.7	12.7	3636	0	0.1	12.6
03.06.2016 10:06:13	11.9	11.9	11.8	11.9	11.9	11.9	3642	0	0.1	11.8
03.06.2016 10:06:19	11.4	11.4	11.2	11.4	11.4	11.4	3648	0	0.2	11.2
03.06.2016 10:06:25	11.2	11.2	11.2	11.2	11.2	11.2	3654	0	0	11.2
03.06.2016 10:06:31	14.4	13.1	12.4	14.4	14.4	13.7	3660	1.3	0.7	12.4
03.06.2016 10:06:37	11.7	11.7	11.6	11.7	11.7	11.7	3666	0	0.1	11.6
03.06.2016 10:06:43	12.7	12.7	12.7	12.7	12.7	12.7	3672	0	0	12.7
03.06.2016 10:06:49	13.4	13.4	13.4	13.4	13.4	13.4	3678	0	0	13.4
03.06.2016 10:06:55	12.6	12.6	12.6	12.6	12.6	12.6	3684	0	0	12.6
03.06.2016 10:07:01	11.9	11.9	11.7	11.9	11.9	11.9	3690	0	0.2	11.7
03.06.2016 10:07:07	11.9	11.8	11.4	11.9	11.9	11.8	3696	0.1	0.4	11.4
03.06.2016 10:07:13	12.5	12.5	12.4	12.5	12.5	12.5	3702	0	0.1	12.4
03.06.2016 10:07:19	13	13	12.9	13	13	13	3708	0	0.1	12.9
03.06.2016 10:07:25	11.6	11.6	11.6	11.6	11.6	11.6	3714	0	0	11.6
03.06.2016 10:07:31	11.9	11.9	11.9	11.9	11.9	11.9	3720	0	0	11.9
03.06.2016 10:07:37	13.5	13.2	12.1	13.5	13.5	13.3	3726	0.3	1.1	12.1
03.06.2016 10:07:43	12.5	12.5	12.5	12.5	12.5	12.5	3732	0	0	12.5
03.06.2016 10:07:49	12.2	12.2	12.2	12.2	12.2	12.2	3738	0	0	12.2
03.06.2016 10:07:55	12.2	11.8	10.6	12.2	12.2	12	3744	0.4	1.2	10.6
03.06.2016 10:08:01	12.3	12.3	12.2	12.3	12.3	12.3	3750	0	0.1	12.2
03.06.2016 10:08:07	11.5	11.5	11.4	11.5	11.5	11.5	3756	0	0.1	11.4
03.06.2016 10:08:13	11.9	11.8	11	49.5	19.6	11.9	3762	0.1	0.8	11
03.06.2016 10:08:19	17.7	11.4	11	17.7	16.8	12.1	3768	6.3	0.4	11
03.06.2016 10:08:25	11.4	11.4	11.4	11.4	11.4	11.4	3774	0	0	11.4
03.06.2016 10:08:31	11.8	11.8	11.5	11.8	11.8	11.8	3780	0	0.3	11.5
03.06.2016 10:08:37	11.6	11.6	11.3	11.6	11.6	11.6	3786	0	0.3	11.3
03.06.2016 10:08:43	11.2	11.1	10.7	11.2	11.2	11.1	3792	0.1	0.4	10.7
03.06.2016 10:08:49	13	12.6	11.9	13	13	12.8	3798	0.4	0.7	11.9
03.06.2016 10:08:55	10.5	10.5	10.5	10.5	10.5	10.5	3804	0	0	10.5
03.06.2016 10:09:01	16.4	12.9	12.5	16.4	16.2	13.7	3810	3.5	0.4	12.5
03.06.2016 10:09:07	11.3	11.3	11.3	11.3	11.3	11.3	3816	0	0	11.3
03.06.2016 10:09:13	14.1	12.8	11.5	14.1	14.1	13.4	3822	1.3	1.3	11.5
03.06.2016 10:09:19	22.4	15.3	14.1	22.7	20.8	15.7	3828	7.1	1.2	14.1
03.06.2016 10:09:25	15.5	15.3	14.3	15.5	15.5	15.4	3834	0.2	1	14.3
03.06.2016 10:09:31	23	15.1	13.7	27.9	22.1	15.4	3840	7.9	1.4	13.7
03.06.2016 10:09:37	13.3	13.3	13.2	13.3	13.3	13.3	3846	0	0.1	13.2
03.06.2016 10:09:43	11.7	11.7	11.7	11.7	11.7	11.7	3852	0	0	11.7
03.06.2016 10:09:49	12.4	12.4	11.9	12.4	12.4	12.4	3858	0	0.5	11.9
03.06.2016 10:09:55	12.6	12.6	12.6	12.6	12.6	12.6	3864	0	0	12.6
03.06.2016 10:10:01	12.1	12.1	12	12.1	12.1	12.1	3870	0	0.1	12
03.06.2016 10:10:07	13.2	13.2	13.2	13.2	13.2	13.2	3876	0	0	13.2
03.06.2016 10:10:13	12.9	12.9	12.8	12.9	12.9	12.9	3882	0	0.1	12.8
03.06.2016 10:10:19	13	13	13	13	13	13	3888	0	0	13
03.06.2016 10:10:25	12.4	12.4	12.3	12.4	12.4	12.4	3894	0	0.1	12.3
03.06.2016 10:10:31	13.2	13	11.8	13.2	13.2	13.1	3900	0.2	1.2	11.8
03.06.2016 10:10:37	11.1	11.1	11	11.1	11.1	11.1	3906	0	0.1	11
03.06.2016 10:10:43	12.3	12.3	12.2	12.3	12.3	12.3	3912	0	0.1	12.2
03.06.2016 10:10:49	11.7	11.5	10.8	11.7	11.7	11.6	3918	0.2	0.7	10.8
03.06.2016 10:10:55	12	11.8	10.6	12	12	11.9	3924	0.2	1.2	10.6
03.06.2016 10:11:01	10.7	10.7	10.7	10.7	10.7	10.7	3930	0	0	10.7
03.06.2016 10:11:07	11.3	11.3	11.3	11.3	11.3	11.3	3936	0	0	11.3
03.06.2016 10:11:13	10.5	10.5	10.4	10.5	10.5	10.5	3942	0	0.1	10.4
03.06.2016 10:11:19	12.4	11.9	10.7	12.4	12.4	12.1	3948	0.5	1.2	10.7
03.06.2016 10:11:25	11.2	11.2	11.2	11.2	11.2	11.2	3954	0	0	11.2
03.06.2016 10:11:31	11.2	11.2	11.2	11.2	11.2	11.2	3960	0	0	11.2
03.06.2016 10:11:37	11.3	11.3	11.2	11.3	11.3	11.3	3966	0	0.1	11.2
03.06.2016 10:11:43	13.7	12.7	10.3	13.7	13.7	13.1	3972	1	2.4	10.3
03.06.2016 10:11:49	11.4	11.3	10.6	11.4	11.4	11.3	3978	0.1	0.7	10.6
03.06.2016 10:11:55	11.6	11.6	11.6	11.6	11.6	11.6	3984	0	0	11.6
03.06.2016 10:12:01	14.1	13.9	13.2	14.1	14.1	14	3990	0.2	0.7	13.2
03.06.2016 10:12:07	12.1	12.1	12.1	12.1	12.1	12.1	3996	0	0	12.1
03.06.2016 10:12:13	14	14	13.8	14	14	14	4002	0	0.2	13.8
03.06.2016 10:12:19	9.8	9.8	9.7	9.8	9.8	9.8	4008	0	0.1	9.7
03.06.2016 10:12:25	10.8	10.8	10.8	10.8	10.8	10.8	4014	0	0	10.8
03.06.2016 10:12:31	9.6	9.6	9.5	9.6	9.6	9.6	4020	0	0.1	9.5
03.06.2016 10:12:37	9.4	9.4	9.4	9.4	9.4	9.4	4026	0	0	9.4
03.06.2016 10:12:43	9.9	9.9	9.6	9.9	9.9	9.9	4032	0	0.3	9.6
03.06.2016 10:12:49	10.3	10.3	10.3	10.3	10.3	10.3	4038	0	0	10.3
03.06.2016 10:12:55	12.8	11.6	9.9	12.8	12.8	12.1	4044	1.2	1.7	9.9
03.06.2016 10:13:01	8.5	8.5	8.5	8.5	8.5	8.5	4050	0	0	8.5
03.06.2016 10:13:07	9.4	9.4	8.9	9.4	9.4	9.4	4056	0	0.5	8.9
03.06.2016 10:13:13	8.6	8.6	8.6	8.6	8.6	8.6	4062	0	0	8.6
03.06.2016 10:13:19	9.4	9.4	9.4	9.4	9.4	9.4	4068	0	0	9.4
03.06.2016 10:13:25	10.6	10.1	9.4	10.6	10.6	10.4	4074	0.5	0.7	9.4
03.06.2016 10:13:31	15.8	12.5	10	15.8	15.7	13.6	4080	3.3	2.5	10
03.06.2016 10:13:37	10.6	10.3	9.4	10.6	10.6	10.4	4086	0.3	0.9	9.4
03.06.2016 10:13:43	12.2	11.7	10.8	12.2	12.2	11.9	4092	0.5	0.9	10.8
03.06.2016 10:13:49	11.2	11.2	11.2	11.2	11.2	11.2	4098	0	0	11.2
03.06.2016 10:13:55	10.4	10.4	10.4	10.4	10.4	10.4	4104	0	0	10.4
03.06.2016 10:14:01	10.6	10.6	10.5	10.6	10.6	10.6	4110	0	0.1	10.5
03.06.2016 10:14:07	10.7	10.7	10.7	10.7	10.7	10.7	4116	0	0	10.7
03.06.2016 10:14:13	11	11	10.9	11	11	11	4122	0	0.1	10.9
03.06.2016 10:14:19	12.3	11.9	10.5	12.3	12.3	12.1	4128	0.4	1.4	10.5
03.06.2016 10:14:25	10.8	10.8	10.7	10.8	10.8	10.8	4134	0	0.1	10.7
03.06.2016 10:14:31	12.6	12.3	11.4	12.6	12.6	12.4	4140	0.3	0.9	11.4
03.06.2016 10:14:37	11.8	11.8	11.5	11.8	11.8	11.8	4146	0	0.3	11.5
03.06.2016 10:14:43	11.9	11.9	11.8	11.9	11.9	11.9	4152	0	0.1	11.8
03.06.2016 10:14:49	18.1	11.7	11.4	18.1	17.3	12.8	4158	6.4	0.3	11.4
03.06.2016 10:14:55	15.8	14.4	13	37.4	22.4	14.6	4164	1.4	1.4	13
03.06.2016 10:15:01	14.4	14.3	13.4	14.4	14.4	14.3	4170	0.1	0.9	13.4
03.06.2016 10:15:07	15.5	14.3	12.9	15.5	15.5	14.9	4176	1.2	1.4	12.9
03.06.2016 10:15:13	12	12	12	12	12	12	4182	0	0	12
03.06.2016 10:15:19	20.4	12.5	11.9	25.4	19.6	12.8	4188	7.9	0.6	11.9
03.06.2016 10:15:25	11.3	11.3	11.3	11.3	11.3	11.3	4194	0	0	11.3
03.06.2016 10:15:31	12.1	12	11.5	12.1	12.1	12.1	4200	0.1	0.5	11.5
03.06.2016 10:15:37	13	13	12.8	13	13	13	4206	0	0.2	12.8
03.06.2016 10:15:43	11.9	11.9	11.9	11.9	11.9	11.9	4212	0	0	11.9
03.06.2016 10:15:49	11.2	11.2	11.1	11.2	11.2	11.2	4218	0	0.1	11.1
03.06.2016 10:15:55	11.6	11.6	11.4	11.6	11.6	11.6	4224	0	0.2	11.4
03.06.2016 10:16:01	11.8	11.8	11.4	11.8	11.8	11.8	4230	0	0.4	11.4
03.06.2016 10:16:07	10.9	10.9	10.9	10.9	10.9	10.9	4236	0	0	10.9
03.06.2016 10:16:13	13.6	12.4	11.1	13.6	13.6	12.9	4242	1.2	1.3	11.1
03.06.2016 10:16:19	11.9	11.9	11.9	11.9	11.9	11.9	4248	0	0	11.9
03.06.2016 10:16:25	11	11	10.4	11	11	11	4254	0	0.6	10.4
03.06.2016 10:16:31	11.6	11.6	11.4	11.6	11.6	11.6	4260	0	0.2	11.4
03.06.2016 10:16:37	21.4	12.8	12.2	26.3	20.5	13.4	4266	8.6	0.6	12.2
03.06.2016 10:16:43	10.9	10.9	10.8	10.9	10.9	10.9	4272	0	0.1	10.8
03.06.2016 10:16:49	12.3	12.3	11.8	12.3	12.3	12.3	4278	0	0.5	11.8
03.06.2016 10:16:55	13.4	12.6	10.7	13.4	13.4	12.9	4284	0.8	1.9	10.7
03.06.2016 10:17:01	22.1	12.7	11.6	22.5	20.4	13.8	4290	9.4	1.1	11.6
03.06.2016 10:17:07	14.8	14	12	14.8	14.8	14.4	4296	0.8	2	12
03.06.2016 10:17:13	21.8	13.8	13.2	26.8	20.9	14.2	4302	8	0.6	13.2
03.06.2016 10:17:19	12.9	12.9	12.6	12.9	12.9	12.9	4308	0	0.3	12.6
03.06.2016 10:17:25	13.9	12.6	11.6	35.5	20.5	12.7	4314	1.3	1	11.6
03.06.2016 10:17:31	20.8	15.4	14.1	20.8	20	16.1	4320	5.4	1.3	14.1
03.06.2016 10:17:37	15.9	13.8	13.2	15.9	15.8	14.3	4326	2.1	0.6	13.2
03.06.2016 10:17:43	14.9	13.8	12.6	14.9	14.9	14.3	4332	1.1	1.2	12.6
03.06.2016 10:17:49	10.7	10.7	10.6	10.7	10.7	10.7	4338	0	0.1	10.6
03.06.2016 10:17:55	12.5	12.4	11.9	12.5	12.5	12.5	4344	0.1	0.5	11.9
03.06.2016 10:18:01	14.7	11.6	10.6	114.3	19.8	12.6	4350	3.1	1	10.6
03.06.2016 10:18:07	16	14	12.5	16	16	14.9	4356	2	1.5	12.5
03.06.2016 10:18:13	17.1	12.9	11.7	17.1	16.8	13.8	4362	4.2	1.2	11.7
03.06.2016 10:18:19	15.8	12.9	12.1	37.4	22.4	13.7	4368	2.9	0.8	12.1
03.06.2016 10:18:25	15.4	12.7	11.7	15.4	15.4	13.5	4374	2.7	1	11.7	0
03.06.2016 10:18:31	15.5	12.3	11.7	15.5	15.2	12.7	4380	3.2	0.6	11.7	6
03.06.2016 10:18:37	14.7	14.2	12.8	14.7	14.7	14.4	4386	0.5	1.4	12.8	12
03.06.2016 10:18:43	30.1	15.3	12.1	35	28.4	16.6	4392	14.8	3.2	12.1	18
03.06.2016 10:18:49	32.1	14.8	14.1	59	36.2	16.1	4398	17.3	0.7	14.1	24
03.06.2016 10:18:55	24.9	16.8	14.6	29.9	24.1	17.2	4404	8.1	2.2	14.6	30
03.06.2016 10:19:01	46.5	19.8	13.7	56.8	43.1	21.8	4410	26.7	6.1	13.7	36
03.06.2016 10:19:07	31.1	19.1	12.6	31.5	29.4	21.3	4416	12	6.5	12.6	42
03.06.2016 10:19:13	38.7	17.2	14.1	225.5	39.7	20.5	4422	21.5	3.1	14.1	48
03.06.2016 10:19:19	12.1	12.1	12	12.1	12.1	12.1	4428	0	0.1	12	54
03.06.2016 10:19:25	12.9	12.9	12.8	12.9	12.9	12.9	4434	0	0.1	12.8	60
03.06.2016 10:19:31	12.4	12.4	12.4	12.4	12.4	12.4	4440	0	0	12.4	66
03.06.2016 10:19:37	27.4	19.4	14.5	49	33.2	20.7	4446	8	4.9	14.5	72
03.06.2016 10:19:43	28.8	18.4	14.1	29.2	27.1	19.9	4452	10.4	4.3	14.1	78
03.06.2016 10:19:49	20.2	15.3	14	20.2	19.9	16.1	4458	4.9	1.3	14	84
03.06.2016 10:19:55	27.9	18.4	17.2	28.2	26.2	19.5	4464	9.5	1.2	17.2	90
03.06.2016 10:20:01	21.6	20.1	17.7	21.6	21.6	20.7	4470	1.5	2.4	17.7	96
03.06.2016 10:20:07	24	14.9	14.7	24.4	22.4	16.3	4476	9.1	0.2	14.7	102
03.06.2016 10:20:13	14.4	14.1	13.2	14.4	14.4	14.2	4482	0.3	0.9	13.2	108
03.06.2016 10:20:19	17.2	12.5	12	60.4	30.4	13.3	4488	4.7	0.5	12	114
03.06.2016 10:20:25	18.5	11.5	10.4	18.9	16.9	11.9	4494	7	1.1	10.4	120
03.06.2016 10:20:31	20.4	17.1	14.8	20.4	20.4	18.6	4500	3.3	2.3	14.8	126
03.06.2016 10:20:37	24	15.9	15.4	24	22.9	16.8	4506	8.1	0.5	15.4	132
03.06.2016 10:20:43	15	14.4	12.8	15	15	14.7	4512	0.6	1.6	12.8	138
03.06.2016 10:20:49	34	15.7	12.7	39.3	31.4	17.1	4518	18.3	3	12.7	144
03.06.2016 10:20:55	20.7	14.1	14	20.7	20.5	16	4524	6.6	0.1	14	150
03.06.2016 10:21:01	26.2	13.8	13	31.2	24.6	14.4	4530	12.4	0.8	13	156
03.06.2016 10:21:07	26.4	16.7	14.1	26.7	24.7	17.9	4536	9.7	2.6	14.1	162
03.06.2016 10:21:13	19.5	15.2	13.2	19.5	19.4	16.8	4542	4.3	2	13.2	168
03.06.2016 10:21:19	13.2	13.2	13.2	13.2	13.2	13.2	4548	0	0	13.2	174
03.06.2016 10:21:25	46.7	18	14.9	73.9	48.4	19.9	4554	28.7	3.1	14.9	180
03.06.2016 10:21:31	21.1	16.7	14.7	21.1	21	18.7	4560	4.4	2	14.7	186
03.06.2016 10:21:37	17.2	16.3	14.3	17.2	17.2	16.7	4566	0.9	2	14.3	192
03.06.2016 10:21:43	26.5	16.3	13.6	126.1	30.8	18.4	4572	10.2	2.7	13.6	198
03.06.2016 10:21:49	21.2	17	14	42.8	27.8	18.1	4578	4.2	3	14	204
03.06.2016 10:21:55	22.2	13.4	12.9	44.1	27.1	14.1	4584	8.8	0.5	12.9	210
03.06.2016 10:22:01	23.7	14.2	13.2	24	22	15.3	4590	9.5	1	13.2	216
03.06.2016 10:22:07	23.8	14.8	13.1	24.1	22.1	16.1	4596	9	1.7	13.1	222
03.06.2016 10:22:13	28.5	14.6	11.5	28.9	26.1	16.4	4602	13.9	3.1	11.5	228
03.06.2016 10:22:19	14.4	12	10.9	14.4	14.4	13.1	4608	2.4	1.1	10.9	234
03.06.2016 10:22:25	32.2	18.2	13.3	94.8	37.9	20.2	4614	14	4.9	13.3	240
03.06.2016 10:22:31	24.3	15.8	12.8	24.3	23.9	18.2	4620	8.5	3	12.8	246
03.06.2016 10:22:37	19.7	18.3	13.8	19.7	19.7	18.9	4626	1.4	4.5	13.8	252
03.06.2016 10:22:43	35.9	13.7	12.9	67.4	40	14.5	4632	22.2	0.8	12.9	258
03.06.2016 10:22:49	23.9	13.8	13.6	24.3	22.2	15.2	4638	10.1	0.2	13.6	264
03.06.2016 10:22:55	29.5	14	13.4	56.1	34.5	15.1	4644	15.5	0.6	13.4	270
03.06.2016 10:23:01	14.3	14.2	13.4	14.3	14.3	14.3	4650	0.1	0.8	13.4	276
03.06.2016 10:23:07	56.9	19	14.9	72.5	51.1	20.7	4656	37.9	4.1	14.9	282
03.06.2016 10:23:13	17.8	14.7	13.6	39.4	24.4	15.6	4662	3.1	1.1	13.6	288
03.06.2016 10:23:19	24.9	15.2	14.3	29.9	24.1	16.3	4668	9.7	0.9	14.3	294
03.06.2016 10:23:25	23.7	14.6	12.7	28.7	22.9	15.4	4674	9.1	1.9	12.7	300
03.06.2016 10:23:31	13.5	13.4	12.7	13.5	13.5	13.4	4680	0.1	0.7	12.7	306
03.06.2016 10:23:37	23.3	14.9	13.3	23.7	21.7	16	4686	8.4	1.6	13.3	312
03.06.2016 10:23:43	13.1	11.6	11	34.7	19.7	11.8	4692	1.5	0.6	11	318
03.06.2016 10:23:49	18.2	14.7	14.1	18.2	17.9	15.3	4698	3.5	0.6	14.1	324
03.06.2016 10:23:55	18.9	16.6	14.8	18.9	18.9	17.6	4704	2.3	1.8	14.8	330
03.06.2016 10:24:01	13.4	13.4	12.9	13.4	13.4	13.4	4710	0	0.5	12.9	336
03.06.2016 10:24:07	11.8	11.8	11.7	11.8	11.8	11.8	4716	0	0.1	11.7	342
03.06.2016 10:24:13	25.3	18.1	13.1	62.8	32.9	21	4722	7.2	5	13.1	348
03.06.2016 10:24:19	150.2	46.1	22.4	376.5	168.2	66.9	4728	104.1	23.7	22.4	354
03.06.2016 10:24:25	203.2	54.4	27.4	591.3	218.3	80.6	4734	148.8	27	27.4	360
03.06.2016 10:24:31	211.6	90.2	39.9	799.7	232.9	114.1	4740	121.4	50.3	39.9	366
03.06.2016 10:24:37	12580.7	845.3	244.9	39149.5	13897.4	2618.5	4746	11735.4	600.4	244.9	372
03.06.2016 10:24:43	4271.9	481.2	130.2	12410.8	4645.5	1040.8	4752	3790.7	351	130.2	378
03.06.2016 10:24:49	3124.3	506	125.4	8993.1	3390.4	901.6	4758	2618.3	380.6	125.4	384
03.06.2016 10:24:55	3326.1	545.3	131.3	12966.4	3849.7	965.5	4764	2780.8	414	131.3	390
03.06.2016 10:25:01	3099.4	406	113.3	8726.8	3456.8	809.2	4770	2693.4	292.7	113.3	396
03.06.2016 10:25:07	2137	315.5	86.9	7861.8	2398.6	612.2	4776	1821.5	228.6	86.9	402
03.06.2016 10:25:13	1836.2	302.9	82.2	5084.1	2080.3	564	4782	1533.3	220.7	82.2	408
03.06.2016 10:25:19	2185	422.9	105.1	6171.6	2378.7	687.9	4788	1762.1	317.8	105.1	414
03.06.2016 10:25:25	1407.8	220.6	65.5	3984.7	1565.3	400.3	4794	1187.2	155.1	65.5	420
03.06.2016 10:25:31	1487.5	238.2	73.5	3436.3	1563.3	430.5	4800	1249.3	164.7	73.5	426
03.06.2016 10:25:37	1176.4	245.8	74.8	2638	1249.6	393.2	4806	930.6	171	74.8	432
03.06.2016 10:25:43	1351.9	332.9	94.9	3319	1433.3	512.4	4812	1019	238	94.9	438
03.06.2016 10:25:49	1335.6	378.7	102.8	2535	1375.1	556.3	4818	956.9	275.9	102.8	444
03.06.2016 10:25:55	1366.8	327.8	94.3	2387.2	1401.8	500.6	4824	1039	233.5	94.3	450
03.06.2016 10:26:01	1133.9	295.1	87.3	2581.3	1211.7	453.7	4830	838.8	207.8	87.3	456
03.06.2016 10:26:07	1168.1	303.5	86.8	2349.7	1184	454.2	4836	864.6	216.7	86.8	462
03.06.2016 10:26:13	987.5	213.9	71.6	1506.5	1013.7	347.4	4842	773.6	142.3	71.6	468
03.06.2016 10:26:19	927.2	215.9	62.4	1651.9	955.9	338.5	4848	711.3	153.5	62.4	474
03.06.2016 10:26:25	870.8	205.5	62.2	1467.3	888.7	321.9	4854	665.3	143.3	62.2	480
03.06.2016 10:26:31	932.5	260.2	74.8	1244.9	938	387.7	4860	672.3	185.4	74.8	486
03.06.2016 10:26:37	908.9	254.6	72.5	1411.8	927.8	370.4	4866	654.3	182.1	72.5	492
03.06.2016 10:26:43	863.7	214	61.5	1537.9	900.6	328.6	4872	649.7	152.5	61.5	498
03.06.2016 10:26:49	675.6	110.1	43.2	1305	731	202.5	4878	565.5	66.9	43.2	504
03.06.2016 10:26:55	478.6	139.5	45.2	1084	492.7	204.3	4884	339.1	94.3	45.2	510
03.06.2016 10:27:01	572.7	139.1	45.2	990.5	592.1	212.9	4890	433.6	93.9	45.2	516
03.06.2016 10:27:07	472.4	111.5	38.7	1052.8	531.5	173.7	4896	360.9	72.8	38.7	522
03.06.2016 10:27:13	549.7	135.6	44.2	948	540.9	201.6	4902	414.1	91.4	44.2	528
03.06.2016 10:27:19	496.6	103.5	37.9	1157.7	523.5	172.8	4908	393.1	65.6	37.9	534
03.06.2016 10:27:25	494	125.2	38.7	854.6	493.8	189.5	4914	368.8	86.5	38.7	540
03.06.2016 10:27:31	349.6	86.9	31.5	514.1	341.3	133.2	4920	262.7	55.4	31.5	546
03.06.2016 10:27:37	393.4	112.6	36.4	561.2	398.9	163.6	4926	280.8	76.2	36.4	552
03.06.2016 10:27:43	351.5	107.4	37.2	638.2	387.2	160	4932	244.1	70.2	37.2	558
03.06.2016 10:27:49	441.9	105	38.1	681.9	456.4	162.2	4938	336.9	66.9	38.1	564
03.06.2016 10:27:55	478.8	115.4	41.7	942.2	477.1	179.2	4944	363.4	73.7	41.7	570
03.06.2016 10:28:01	354	94.3	32.8	851.4	382.9	140.8	4950	259.7	61.5	32.8	576
03.06.2016 10:28:07	495.3	125.2	43	725.8	495.7	186	4956	370.1	82.2	43	582
03.06.2016 10:28:13	497.4	129	43	738.1	490.3	189.7	4962	368.4	86	43	588
03.06.2016 10:28:19	423.8	116.8	40.5	895.1	431.8	171.7	4968	307	76.3	40.5	594
03.06.2016 10:28:25	274.2	92.2	35.7	438.5	287.2	130.9	4974	182	56.5	35.7	600
03.06.2016 10:28:31	345.4	114.6	35.9	531.3	353.5	159.8	4980	230.8	78.7	35.9	606
03.06.2016 10:28:37	347.8	89.7	30.9	528.3	358.1	131.7	4986	258.1	58.8	30.9	612
03.06.2016 10:28:43	316.8	83.8	31.9	519.7	326.4	122.4	4992	233	51.9	31.9	618
03.06.2016 10:28:49	356.1	101.6	35.7	522.8	361.4	145.5	4998	254.5	65.9	35.7	624
03.06.2016 10:28:55	349.3	90.3	34.7	444.2	328.5	135.3	5004	259	55.6	34.7	630
03.06.2016 10:29:01	329.4	104.2	34.9	543.2	348.3	147.5	5010	225.2	69.3	34.9	636
03.06.2016 10:29:07	318.7	88.3	34.1	471.8	308.6	132.1	5016	230.4	54.2	34.1	642
03.06.2016 10:29:13	229.6	86	31.7	278.1	226.7	120.7	5022	143.6	54.3	31.7	648
03.06.2016 10:29:19	286.2	81.4	31.5	367.3	279.1	116.6	5028	204.8	49.9	31.5	654
03.06.2016 10:29:25	252.4	78.7	31.9	444.1	262.4	116.6	5034	173.7	46.8	31.9	660
03.06.2016 10:29:31	336	76.4	28.6	431.1	320.5	111.3	5040	259.6	47.8	28.6	666
03.06.2016 10:29:37	253.5	61	29.3	347	253.9	98.7	5046	192.5	31.7	29.3	672
03.06.2016 10:29:43	221	69.5	28.8	514	215.6	100.5	5052	151.5	40.7	28.8	678
03.06.2016 10:29:49	208.9	67.8	27.8	257.1	203.7	96.6	5058	141.1	40	27.8
03.06.2016 10:29:55	228.2	72	27.9	283.5	223.3	99.1	5064	156.2	44.1	27.9
03.06.2016 10:30:01	224.8	72.6	28.7	410.1	227.4	96.7	5070	152.2	43.9	28.7
03.06.2016 10:30:07	211.7	54.6	23.8	326.5	211	80.4	5076	157.1	30.8	23.8
03.06.2016 10:30:13	278.8	71.7	28.7	436.2	269.5	107.2	5082	207.1	43	28.7
03.06.2016 10:30:19	169.9	40.6	20.6	220.1	167.4	62.5	5088	129.3	20	20.6
03.06.2016 10:30:25	160.9	49.6	22.8	273.1	168.3	67.2	5094	111.3	26.8	22.8
03.06.2016 10:30:31	159.6	54.1	21.8	217.4	157.2	71.7	5100	105.5	32.3	21.8
03.06.2016 10:30:37	165.6	57.7	23.8	267.9	176.2	78.6	5106	107.9	33.9	23.8
03.06.2016 10:30:43	155.3	47	20.9	179.3	147	65.9	5112	108.3	26.1	20.9
03.06.2016 10:30:49	181.2	54.8	22.6	239.6	183.1	78.4	5118	126.4	32.2	22.6
03.06.2016 10:30:55	127.7	61.8	24.7	165.9	130.7	80.5	5124	65.9	37.1	24.7
03.06.2016 10:31:01	234	77.2	29.7	399.4	238	109.3	5130	156.8	47.5	29.7
03.06.2016 10:31:07	189.4	61.8	27.2	205.4	177.5	86.2	5136	127.6	34.6	27.2
03.06.2016 10:31:13	178.4	68.5	28.4	248.5	183	91.4	5142	109.9	40.1	28.4
03.06.2016 10:31:19	152.4	35.3	17.9	164.4	138.4	56.2	5148	117.1	17.4	17.9
03.06.2016 10:31:25	188.8	68	28.4	221.4	183.8	91.4	5154	120.8	39.6	28.4
03.06.2016 10:31:31	212	67.3	27.8	276	206	99.5	5160	144.7	39.5	27.8
03.06.2016 10:31:37	188.1	65.7	26.6	203.4	179.3	93.6	5166	122.4	39.1	26.6
03.06.2016 10:31:43	177.2	55.1	24.6	182.5	167.2	82.2	5172	122.1	30.5	24.6
03.06.2016 10:31:49	226.3	66.9	26.5	301.3	213.7	92.7	5178	159.4	40.4	26.5
03.06.2016 10:31:55	199.8	60.4	26.4	237.3	194.1	89.5	5184	139.4	34	26.4
03.06.2016 10:32:01	146.1	60	23.7	166.3	139.3	77.4	5190	86.1	36.3	23.7
03.06.2016 10:32:07	170.5	46.5	22	208	165.5	71.1	5196	124	24.5	22
03.06.2016 10:32:13	163.9	49.7	22	223.4	164.4	69.4	5202	114.2	27.7	22
03.06.2016 10:32:19	139.5	70.2	26	166	141.6	87.5	5208	69.3	44.2	26
03.06.2016 10:32:25	130.2	40.3	20.7	131.2	120.3	58.7	5214	89.9	19.6	20.7
03.06.2016 10:32:31	136.9	34	19	228.2	148.4	53.5	5220	102.9	15	19
03.06.2016 10:32:37	97.7	42.2	17.8	136	100.6	55.7	5226	55.5	24.4	17.8
03.06.2016 10:32:43	103	35.6	18.1	104.1	96	49.5	5232	67.4	17.5	18.1
03.06.2016 10:32:49	87.1	21.2	14.7	114	87.8	33.6	5238	65.9	6.5	14.7
03.06.2016 10:32:55	94.8	32.5	15.7	95.5	87	43.1	5244	62.3	16.8	15.7
03.06.2016 10:33:01	59.3	27.7	14.8	80.9	64.1	36.1	5250	31.6	12.9	14.8
03.06.2016 10:33:07	102	39.3	16.4	112.6	94.9	49.3	5256	62.7	22.9	16.4
03.06.2016 10:33:13	51.1	28.3	13.8	72.7	56.7	35.2	5262	22.8	14.5	13.8
03.06.2016 10:33:19	58.7	24.7	13	121.3	63.1	31.5	5268	34	11.7	13
03.06.2016 10:33:25	74.1	19.3	12.9	89.3	67.1	24.8	5274	54.8	6.4	12.9
03.06.2016 10:33:31	51.2	21	12.8	51.9	47.5	27.2	5280	30.2	8.2	12.8
03.06.2016 10:33:37	44.7	21.6	12.2	44.7	43.4	28	5286	23.1	9.4	12.2
03.06.2016 10:33:43	70.6	26	13.3	92.9	71.6	33.7	5292	44.6	12.7	13.3
03.06.2016 10:33:49	68.4	28.8	14	73.4	64.5	35.6	5298	39.6	14.8	14
03.06.2016 10:33:55	82.9	27.9	15.9	93.5	77.2	37.8	5304	55	12	15.9
03.06.2016 10:34:01	87.9	42.1	20	88.6	82.6	51.9	5310	45.8	22.1	20
03.06.2016 10:34:07	125.2	35.1	17	131.6	114.4	49.5	5316	90.1	18.1	17
03.06.2016 10:34:13	127.3	36.2	21.1	314	142.5	51.3	5322	91.1	15.1	21.1
03.06.2016 10:34:19	102	39.9	18.5	107.6	96	53.3	5328	62.1	21.4	18.5
03.06.2016 10:34:25	116.6	32.8	16.4	160.1	114.9	48.2	5334	83.8	16.4	16.4
03.06.2016 10:34:31	72	40.8	16.5	72	70.9	50.5	5340	31.2	24.3	16.5
03.06.2016 10:34:37	67.5	21.8	14	72.8	63.3	31.8	5346	45.7	7.8	14
03.06.2016 10:34:43	84.9	38.6	18.9	85.2	79.5	46.9	5352	46.3	19.7	18.9
03.06.2016 10:34:49	70.2	32.9	17.3	75.2	67.5	41.8	5358	37.3	15.6	17.3
03.06.2016 10:34:55	55.6	25	13.7	77.2	60.6	33.3	5364	30.6	11.3	13.7
03.06.2016 10:35:01	59.4	31.3	17.5	59.4	58.6	41.5	5370	28.1	13.8	17.5
03.06.2016 10:35:07	54.9	24	15.4	54.9	53.8	34	5376	30.9	8.6	15.4
03.06.2016 10:35:13	97.2	40.6	19.5	97.2	94.8	56.7	5382	56.6	21.1	19.5
03.06.2016 10:35:19	77.8	30.9	18.7	328.7	91.7	39.4	5388	46.9	12.2	18.7
03.06.2016 10:35:25	66	26.6	17.5	66.3	61.8	33.9	5394	39.4	9.1	17.5
03.06.2016 10:35:31	72.2	25.5	16.6	72.9	66.3	33.5	5400	46.7	8.9	16.6
03.06.2016 10:35:37	77.5	29	16.6	99.4	80.1	39.8	5406	48.5	12.4	16.6
03.06.2016 10:35:43	73.1	27.7	15.9	78.8	68.1	35.8	5412	45.4	11.8	15.9
03.06.2016 10:35:49	91.1	23.9	17.2	97.8	80.8	32.7	5418	67.2	6.7	17.2
03.06.2016 10:35:55	61.6	21.5	13	124.3	65.2	29.6	5424	40.1	8.5	13
03.06.2016 10:36:01	35.5	18.7	13.3	35.8	33.6	22.4	5430	16.8	5.4	13.3
03.06.2016 10:36:07	47.9	23	12.8	48.3	45.4	28.2	5436	24.9	10.2	12.8
03.06.2016 10:36:13	53.1	23.9	16.6	53.8	49.3	29.7	5442	29.2	7.3	16.6
03.06.2016 10:36:19	46.3	27.9	17.5	125.9	58.1	32.5	5448	18.4	10.4	17.5
03.06.2016 10:36:25	48.6	27.3	18.7	48.9	46.8	33.7	5454	21.3	8.6	18.7
03.06.2016 10:36:31	63.1	37.3	18.7	122.2	75.8	43.9	5460	25.8	18.6	18.7
03.06.2016 10:36:37	62	24.9	16.9	62.7	57.7	31.8	5466	37.1	8	16.9
03.06.2016 10:36:43	119.8	43.8	23.8	125.8	111.4	57.6	5472	76	20	23.8
03.06.2016 10:36:49	50.9	25.5	17.2	72.5	56	31.9	5478	25.4	8.3	17.2
03.06.2016 10:36:55	53.8	26.4	17.9	54.2	51.6	34.2	5484	27.4	8.5	17.9
03.06.2016 10:37:01	49.3	20.9	14.1	71.6	52.5	26.9	5490	28.4	6.8	14.1
03.06.2016 10:37:07	78	38.6	20.6	83.3	74.5	46.3	5496	39.4	18	20.6
03.06.2016 10:37:13	65.2	36.5	18.6	70.1	63.6	43.2	5502	28.7	17.9	18.6
03.06.2016 10:37:19	83.2	35.5	20.2	88.5	79.2	44.9	5508	47.7	15.3	20.2
03.06.2016 10:37:25	86.3	34.4	22	86.7	81.4	45.9	5514	51.9	12.4	22
03.06.2016 10:37:31	73.4	28.5	17.6	95.3	76.3	38.7	5520	44.9	10.9	17.6
03.06.2016 10:37:37	85.4	25.8	17	217.3	91.2	36.2	5526	59.6	8.8	17
03.06.2016 10:37:43	81.9	25.8	16.5	91.9	76.6	34.3	5532	56.1	9.3	16.5
03.06.2016 10:37:49	72.4	50	22.8	72.4	71.8	57.5	5538	22.4	27.2	22.8
03.06.2016 10:37:55	72.3	35.2	20.3	72.7	69.1	44.1	5544	37.1	14.9	20.3
03.06.2016 10:38:01	73.2	36.8	20.9	94.8	77.9	47	5550	36.4	15.9	20.9
03.06.2016 10:38:07	57.3	30.3	20.1	57.3	56.5	39.6	5556	27	10.2	20.1
03.06.2016 10:38:13	63.4	30.9	16.1	68.4	61.4	38	5562	32.5	14.8	16.1
03.06.2016 10:38:19	43.8	24.9	16	43.8	42.7	30.2	5568	18.9	8.9	16
03.06.2016 10:38:25	35.6	19.8	14.5	93.2	41.9	24.8	5574	15.8	5.3	14.5
03.06.2016 10:38:31	48.4	28.7	17	53.4	46.7	32.2	5580	19.7	11.7	17
03.06.2016 10:38:37	61.1	30.4	18.6	61.8	56.9	36.9	5586	30.7	11.8	18.6
03.06.2016 10:38:43	52.4	27.8	16.6	52.4	50.9	34.6	5592	24.6	11.2	16.6
03.06.2016 10:38:49	66.8	28.5	17.5	67.5	62	35.2	5598	38.3	11	17.5
03.06.2016 10:38:55	50.6	21.6	16.4	55.6	48.6	27.8	5604	29	5.2	16.4
03.06.2016 10:39:01	62.8	26	15.3	68.1	58.9	32.6	5610	36.8	10.7	15.3
03.06.2016 10:39:07	30.5	17	14	30.5	30	21	5616	13.5	3	14
03.06.2016 10:39:13	46.5	30.4	18.6	46.8	44.7	34.1	5622	16.1	11.8	18.6
03.06.2016 10:39:19	28.9	18.8	15	28.9	28.7	22.2	5628	10.1	3.8	15
03.06.2016 10:39:25	49.7	27.7	15.7	50	47.8	33.3	5634	22	12	15.7
03.06.2016 10:39:31	33.9	18	14.3	38.9	33	21.5	5640	15.9	3.7	14.3
03.06.2016 10:39:37	42.5	24.9	15.8	47.4	41.5	28.8	5646	17.6	9.1	15.8
03.06.2016 10:39:43	49.9	20.1	15.8	60.2	46.5	23.9	5652	29.8	4.3	15.8
03.06.2016 10:39:49	41.2	20.2	15.1	41.2	39.3	25	5658	21	5.1	15.1
03.06.2016 10:39:55	33.9	20.3	14.5	33.9	32.9	23.9	5664	13.6	5.8	14.5
03.06.2016 10:40:01	40	21.4	14.1	40.3	38.2	26.6	5670	18.6	7.3	14.1
03.06.2016 10:40:07	27.1	17.5	13.7	27.1	26.7	20.1	5676	9.6	3.8	13.7

## Sheet: 10OS
date & time	PM10 [ug/m3]	PM2,5 [ug/m3]	PM1 [ug/m3]	Inhalable [ug/m3]	Thoracic [ug/m3]	Alveolic [ug/m3]	Zeit in sek	2.5 bis 10	1 bis 2.5	kleiner 1
03.06.2016 12:14:37	17.5	16.2	14.3	17.5	17.5	16.8	6	1.3	1.9	14.3		Sägedauer	36			Temperature [°C]	Humidity [%rH]
03.06.2016 12:14:43	16.3	16.2	15.3	16.3	16.3	16.2	12	0.1	0.9	15.3						28.31	40.7
03.06.2016 12:14:49	15	15	14.5	15	15	15	18	0	0.5	14.5						28.31	41.12
03.06.2016 12:14:55	22	20.3	18.4	43.6	28.6	20.6	24	1.7	1.9	18.4						27.73	43.2
03.06.2016 12:15:01	26.6	16	15	31.6	25.7	17.1	30	10.6	1	15						27.16	45.08
03.06.2016 12:15:07	16	15.8	14.6	16	16	15.9	36	0.2	1.2	14.6						26.78	46.86
03.06.2016 12:15:13	17.2	15.1	13.8	17.2	17.1	15.7	42	2.1	1.3	13.8						26.49	48.32
03.06.2016 12:15:19	13.9	13.8	13.4	13.9	13.9	13.9	48	0.1	0.4	13.4						26.11	48.42
03.06.2016 12:15:25	15.9	15.8	15.4	15.9	15.9	15.9	54	0.1	0.4	15.4						25.91	50.41
03.06.2016 12:15:31	16.4	16.4	16.4	16.4	16.4	16.4	60	0	0	16.4						25.82	50.2
03.06.2016 12:15:37	20.4	17	16.2	20.4	20.3	18.2	66	3.4	0.8	16.2						25.63	49.57
03.06.2016 12:15:43	39.6	23.9	21.8	61.5	44.2	26.3	72	15.7	2.1	21.8						25.53	51.03
03.06.2016 12:15:49	32.3	23.9	20.2	32.3	31.9	26.3	78	8.4	3.7	20.2						25.43	49.36
03.06.2016 12:15:55	24.8	17.7	17	24.8	24.4	19.5	84	7.1	0.7	17						25.34	48.42
03.06.2016 12:16:01	22.8	19.1	17.6	22.8	22.6	20	90	3.7	1.5	17.6						25.24	48.01
03.06.2016 12:16:07	16.2	16.1	15.2	16.2	16.2	16.1	96	0.1	0.9	15.2						25.15	49.99
03.06.2016 12:16:13	31	16.7	16.6	31.4	28.5	18.3	102	14.3	0.1	16.6						25.05	51.45
03.06.2016 12:16:19	22.5	19.4	17.5	22.5	22.4	20.7	108	3.1	1.9	17.5						24.96	52.91
03.06.2016 12:16:25	28.1	17.5	15.6	28.5	26.4	19.1	114	10.6	1.9	15.6						24.96	53.23
03.06.2016 12:16:31	48.9	28.6	21.9	54.2	46.1	30.6	120	20.3	6.7	21.9						24.86	55
03.06.2016 12:16:37	29.6	18.2	17.9	30	27.9	19.8	126	11.4	0.3	17.9						24.86	55.11
03.06.2016 12:16:43	15.8	15.7	14.4	15.8	15.8	15.7	132	0.1	1.3	14.4						24.86	54.27
03.06.2016 12:16:49	32.7	22.2	17.1	33.1	31	23.8	138	10.5	5.1	17.1						24.86	54.17
03.06.2016 12:16:55	18.1	18	16.2	18.1	18.1	18.1	144	0.1	1.8	16.2						24.86	52.81
03.06.2016 12:17:01	14.7	14.7	14.4	14.7	14.7	14.7	150	0	0.3	14.4						24.86	52.6
03.06.2016 12:17:07	19.5	15.9	13.8	41.1	26	17	156	3.6	2.1	13.8						24.86	52.29
03.06.2016 12:17:13	23.3	18.3	16.4	23.3	23	19.5	162	5	1.9	16.4						24.86	50.2
03.06.2016 12:17:19	15.1	13.4	12.9	15.1	15.1	14.1	168	1.7	0.5	12.9						24.76	50.62
03.06.2016 12:17:25	17.7	15.8	13.8	17.7	17.7	16.6	174	1.9	2	13.8						24.76	51.24
03.06.2016 12:17:31	16.6	16.3	14.5	16.6	16.6	16.4	180	0.3	1.8	14.5						24.76	51.97
03.06.2016 12:17:37	20.8	15.8	14.9	20.8	20.7	17.7	186	5	0.9	14.9						24.76	53.12
03.06.2016 12:17:43	29.2	16.3	14.7	34.2	28.3	18.5	192	12.9	1.6	14.7						24.67	54.58
03.06.2016 12:17:49	21.8	19.5	16.8	21.8	21.7	20.5	198	2.3	2.7	16.8						24.76	55.63
03.06.2016 12:17:55	26.5	19	16.7	26.5	26.3	21.6	204	7.5	2.3	16.7						24.76	54.9
03.06.2016 12:18:01	23	14.4	13.7	512.9	40.2	14.6	210	8.6	0.7	13.7
03.06.2016 12:18:07	20.5	16.9	14.3	20.5	20.5	18.6	216	3.6	2.6	14.3
03.06.2016 12:18:13	28.4	19.3	15.5	28.8	26.8	20.6	222	9.1	3.8	15.5
03.06.2016 12:18:19	23.6	18.6	12.9	45.2	30.1	20.3	228	5	5.7	12.9
03.06.2016 12:18:25	23.7	17.7	14.2	23.7	23.6	19.7	234	6	3.5	14.2
03.06.2016 12:18:31	28.7	17.2	15.1	29	27	19.2	240	11.5	2.1	15.1
03.06.2016 12:18:37	31.4	22.2	17.6	36.4	30.6	23	246	9.2	4.6	17.6
03.06.2016 12:18:43	29.3	21.8	15.9	29.3	28.9	23.7	252	7.5	5.9	15.9
03.06.2016 12:18:49	27.5	22.3	14.6	27.5	27.5	24.7	258	5.2	7.7	14.6
03.06.2016 12:18:55	39.1	23.6	16.6	39.4	37.3	27	264	15.5	7	16.6
03.06.2016 12:19:01	38.7	22	15	38.7	37.8	26	270	16.7	7	15
03.06.2016 12:19:07	26.1	16.3	13.8	26.1	25.2	18.3	276	9.8	2.5	13.8
03.06.2016 12:19:13	19.2	15.2	14.1	19.2	19.1	16.6	282	4	1.1	14.1
03.06.2016 12:19:19	29	16.9	13.4	29	28.8	21.6	288	12.1	3.5	13.4
03.06.2016 12:19:25	24.6	18.2	15.4	24.6	24.4	20	294	6.4	2.8	15.4
03.06.2016 12:19:31	37.4	28.7	19.8	37.4	37.3	32.2	300	8.7	8.9	19.8
03.06.2016 12:19:37	22.1	14.3	13.3	22.1	21.2	16	306	7.8	1	13.3
03.06.2016 12:19:43	30	18.4	14.2	30.4	28.1	19.8	312	11.6	4.2	14.2
03.06.2016 12:19:49	31.2	19.1	15.8	36.2	30.3	20.9	318	12.1	3.3	15.8
03.06.2016 12:19:55	32.5	24.2	18.5	32.5	31.7	26.2	324	8.3	5.7	18.5
03.06.2016 12:20:01	50.3	38.7	28.2	50.3	49.8	41.8	330	11.6	10.5	28.2
03.06.2016 12:20:07	48.2	34.7	29.5	48.2	46.5	36.9	336	13.5	5.2	29.5
03.06.2016 12:20:13	46.3	36.2	28.4	46.3	45.5	38.9	342	10.1	7.8	28.4
03.06.2016 12:20:19	42.4	39.1	31.4	42.4	42.4	40.6	348	3.3	7.7	31.4
03.06.2016 12:20:25	72.3	41.3	33.4	95	73.6	44.7	354	31	7.9	33.4
03.06.2016 12:20:31	46.8	41.5	34.9	46.8	46.7	43.5	360	5.3	6.6	34.9
03.06.2016 12:20:37	63.1	40.6	31.4	73	60.6	42.4	366	22.5	9.2	31.4
03.06.2016 12:20:43	70.7	42.2	38.6	70.7	69.2	49.6	372	28.5	3.6	38.6
03.06.2016 12:20:49	59.8	44.9	36.7	60.1	57.7	47.4	378	14.9	8.2	36.7
03.06.2016 12:20:55	66.9	63.3	58.4	66.9	66.8	64.5	384	3.6	4.9	58.4
03.06.2016 12:21:01	70.4	57.2	50.3	70.4	69.2	60	390	13.2	6.9	50.3
03.06.2016 12:21:07	67.3	53	47.1	67.7	65.3	55.2	396	14.3	5.9	47.1
03.06.2016 12:21:13	57.3	52.4	45.9	57.3	57.3	54.6	402	4.9	6.5	45.9
03.06.2016 12:21:19	58.8	52.3	47.8	58.8	58.5	54.1	408	6.5	4.5	47.8
03.06.2016 12:21:25	56.9	41.2	36.5	78.8	61.5	43.6	414	15.7	4.7	36.5
03.06.2016 12:21:31	64	48.3	42.7	69	62.6	50.1	420	15.7	5.6	42.7
03.06.2016 12:21:37	61.1	50.7	44.3	61.5	59.5	52.6	426	10.4	6.4	44.3
03.06.2016 12:21:43	50.4	45	39.8	50.4	50.2	46.6	432	5.4	5.2	39.8
03.06.2016 12:21:49	70.8	53	42.3	92.7	75.1	55.6	438	17.8	10.7	42.3
03.06.2016 12:21:55	38.9	38.9	36.8	38.9	38.9	38.9	444	0	2.1	36.8
03.06.2016 12:22:01	53.3	45	39.5	74.9	59.1	46.5	450	8.3	5.5	39.5
03.06.2016 12:22:07	63.5	53.2	49.3	63.5	62.6	55.3	456	10.3	3.9	49.3
03.06.2016 12:22:13	49.7	46.4	37.1	49.7	49.7	47.9	462	3.3	9.3	37.1
03.06.2016 12:22:19	53.1	40.8	35.4	75	58	42.7	468	12.3	5.4	35.4
03.06.2016 12:22:25	73.8	62	57.9	78.8	72.9	64	474	11.8	4.1	57.9
03.06.2016 12:22:31	76	59.8	56.3	76.3	73.4	61.8	480	16.2	3.5	56.3
03.06.2016 12:22:37	59.5	55.3	49	59.5	59.5	57.2	486	4.2	6.3	49
03.06.2016 12:22:43	70.7	40.4	33.9	81	66.6	42.9	492	30.3	6.5	33.9
03.06.2016 12:22:49	55.7	34.5	32.1	93.6	60.1	37.4	498	21.2	2.4	32.1
03.06.2016 12:22:55	53.9	40.9	32.2	58.8	53	43.5	504	13	8.7	32.2
03.06.2016 12:23:01	74.4	47.2	30.2	79.7	71.7	52.2	510	27.2	17	30.2
03.06.2016 12:23:07	55.6	43.6	32.8	55.6	55	46.9	516	12	10.8	32.8
03.06.2016 12:23:13	63.2	37.8	31.8	68.5	59.8	41.1	522	25.4	6	31.8
03.06.2016 12:23:19	54	40.5	32.7	54	53.1	44.1	528	13.5	7.8	32.7
03.06.2016 12:23:25	48.9	38.8	32.8	48.9	48	41.2	534	10.1	6	32.8
03.06.2016 12:23:31	44.5	37.9	33.5	44.5	44.3	40.1	540	6.6	4.4	33.5
03.06.2016 12:23:37	62.7	43.7	38.3	105.2	68.9	46.6	546	19	5.4	38.3
03.06.2016 12:23:43	50.5	43.6	40.9	50.5	49.7	44.9	552	6.9	2.7	40.9
03.06.2016 12:23:49	46.6	44.5	38.7	46.6	46.6	45.4	558	2.1	5.8	38.7
03.06.2016 12:23:55	58.5	46.4	37.6	58.8	56.8	49	564	12.1	8.8	37.6
03.06.2016 12:24:01	57.7	38.5	34	58.1	54.5	40.8	570	19.2	4.5	34
03.06.2016 12:24:07	41	38.1	35.9	41	41	39	576	2.9	2.2	35.9
03.06.2016 12:24:13	43.2	40.6	35	43.2	43.2	41.8	582	2.6	5.6	35
03.06.2016 12:24:19	36.6	36.1	33.7	36.6	36.6	36.3	588	0.5	2.4	33.7
03.06.2016 12:24:25	55.6	41.5	38.6	60.5	53.9	42.8	594	14.1	2.9	38.6
03.06.2016 12:24:31	53.4	41.5	40	80	59.1	42.7	600	11.9	1.5	40
03.06.2016 12:24:37	53.5	45.6	41.8	53.5	53.3	48.7	606	7.9	3.8	41.8
03.06.2016 12:24:43	59.2	38.4	35.8	86.2	63	39.9	612	20.8	2.6	35.8
03.06.2016 12:24:49	50.8	38.7	33.2	55.8	50	40.9	618	12.1	5.5	33.2
03.06.2016 12:24:55	42.8	37.7	33.7	42.8	42.7	39.6	624	5.1	4	33.7
03.06.2016 12:25:01	48.5	42.4	36.9	48.5	48.2	44.1	630	6.1	5.5	36.9	0
03.06.2016 12:25:07	50.1	40	36	87.6	57	42.8	636	10.1	4	36	6
03.06.2016 12:25:13	49.2	44.5	39.3	49.2	49.2	46.6	642	4.7	5.2	39.3	12
03.06.2016 12:25:19	44.5	39.8	36.2	44.5	44.4	41.5	648	4.7	3.6	36.2	18
03.06.2016 12:25:25	34	33.9	32.4	34	34	33.9	654	0.1	1.5	32.4	24
03.06.2016 12:25:31	44.4	39.5	32.8	44.4	44.3	41.3	660	4.9	6.7	32.8	30
03.06.2016 12:25:37	45.6	38.4	37.8	45.6	45.1	39.9	666	7.2	0.6	37.8	36
03.06.2016 12:25:43	49.9	44.6	41.6	49.9	49.9	46.6	672	5.3	3	41.6	42
03.06.2016 12:25:49	34.5	34.4	33.1	34.5	34.5	34.5	678	0.1	1.3	33.1	48
03.06.2016 12:25:55	42.9	33.4	31.4	43.2	41.2	34.5	684	9.5	2	31.4	54
03.06.2016 12:26:01	43.1	36	32.9	43.1	42.2	37.1	690	7.1	3.1	32.9	60
03.06.2016 12:26:07	52.5	36.8	35.8	52.5	50.1	38.6	696	15.7	1	35.8	66
03.06.2016 12:26:13	31.1	31.1	29.7	31.1	31.1	31.1	702	0	1.4	29.7	72
03.06.2016 12:26:19	40.3	34.8	31.9	61.9	46.9	36.8	708	5.5	2.9	31.9	78
03.06.2016 12:26:25	41.2	36.9	34.6	41.2	41.1	38.4	714	4.3	2.3	34.6	84
03.06.2016 12:26:31	54.4	38.9	37.7	64.3	52.7	39.3	720	15.5	1.2	37.7	90
03.06.2016 12:26:37	44	40	37.9	65.6	50.6	41.3	726	4	2.1	37.9	96
03.06.2016 12:26:43	42	35.6	33.4	42	41.2	36.7	732	6.4	2.2	33.4	102
03.06.2016 12:26:49	27.7	26.9	24.5	27.7	27.7	27.3	738	0.8	2.4	24.5	108
03.06.2016 12:26:55	29.8	29.8	29.5	29.8	29.8	29.8	744	0	0.3	29.5	114
03.06.2016 12:27:01	31.1	31	29.8	31.1	31.1	31	750	0.1	1.2	29.8	120
03.06.2016 12:27:07	41.2	28.8	26.6	63.2	45.4	29.4	756	12.4	2.2	26.6	126
03.06.2016 12:27:13	38.9	31	29.9	39.2	37.3	31.8	762	7.9	1.1	29.9	132
03.06.2016 12:27:19	34.6	32.5	29.3	34.6	34.6	33.4	768	2.1	3.2	29.3	138
03.06.2016 12:27:25	52.1	37.6	33.7	57.1	50.8	39.1	774	14.5	3.9	33.7	144
03.06.2016 12:27:31	33.2	31	27.6	33.2	33.1	31.9	780	2.2	3.4	27.6	150
03.06.2016 12:27:37	45.5	31.2	28.6	50.4	43.8	32.6	786	14.3	2.6	28.6	156
03.06.2016 12:27:43	43.3	28.9	25.8	48.3	41.7	30.4	792	14.4	3.1	25.8	162
03.06.2016 12:27:49	27.9	22.3	20.2	27.9	27.8	24.5	798	5.6	2.1	20.2	168
03.06.2016 12:27:55	36.9	27.1	26	41.9	36	28.2	804	9.8	1.1	26	174
03.06.2016 12:28:01	24.4	24.4	24	24.4	24.4	24.4	810	0	0.4	24	180
03.06.2016 12:28:07	33.9	24.4	22.8	60.5	39.7	24.9	816	9.5	1.6	22.8	186
03.06.2016 12:28:13	34.6	29.5	25.5	56.2	41.2	31	822	5.1	4	25.5	192
03.06.2016 12:28:19	26.5	25.8	24	26.5	26.5	26.1	828	0.7	1.8	24	198
03.06.2016 12:28:25	34.3	24.3	21.9	39.2	33.4	25.5	834	10	2.4	21.9	204
03.06.2016 12:28:31	21.9	21.2	17.9	21.9	21.9	21.5	840	0.7	3.3	17.9	210
03.06.2016 12:28:37	23.3	22.2	18.2	23.3	23.3	22.7	846	1.1	4	18.2	216
03.06.2016 12:28:43	29.6	21.6	19.5	30	28	22.4	852	8	2.1	19.5	222
03.06.2016 12:28:49	28.7	20.8	19.9	29	27	21.6	858	7.9	0.9	19.9	228
03.06.2016 12:28:55	26.5	23.2	19.8	64.1	34.2	24.3	864	3.3	3.4	19.8	234
03.06.2016 12:29:01	25.1	23.9	21.5	25.1	25.1	24.4	870	1.2	2.4	21.5	240
03.06.2016 12:29:07	32.6	23.9	21.5	37.5	31.7	24.5	876	8.7	2.4	21.5	246
03.06.2016 12:29:13	27.3	22	19.2	48.9	33.6	22.9	882	5.3	2.8	19.2	252
03.06.2016 12:29:19	39.5	23.2	20.9	208.2	57.3	23.5	888	16.3	2.3	20.9	258
03.06.2016 12:29:25	41.6	25.4	24.1	51.6	40	26.2	894	16.2	1.3	24.1	264
03.06.2016 12:29:31	37.2	26.7	23.4	37.6	35.5	27.9	900	10.5	3.3	23.4	270
03.06.2016 12:29:37	29.1	24.7	22.8	50.7	35.6	25.8	906	4.4	1.9	22.8	276
03.06.2016 12:29:43	34.5	26.4	24.4	34.5	33.4	27.3	912	8.1	2	24.4	282
03.06.2016 12:29:49	26.7	24.3	22.5	26.7	26.6	25	918	2.4	1.8	22.5	288
03.06.2016 12:29:55	23.8	23.7	22.7	23.8	23.8	23.8	924	0.1	1	22.7	294
03.06.2016 12:30:01	32.8	23.7	22.7	90.8	38	24.7	930	9.1	1	22.7	300
03.06.2016 12:30:07	24.2	24.2	22.6	24.2	24.2	24.2	936	0	1.6	22.6	306
03.06.2016 12:30:13	35.5	35.3	33.4	35.5	35.5	35.4	942	0.2	1.9	33.4	312
03.06.2016 12:30:19	45	36	31.6	50	44.2	36.8	948	9	4.4	31.6	318
03.06.2016 12:30:25	43.8	34.9	31.5	43.8	43.4	37.5	954	8.9	3.4	31.5	324
03.06.2016 12:30:31	53.5	42.1	33.4	293	63.1	45.8	960	11.4	8.7	33.4	330
03.06.2016 12:30:37	136.1	34.7	27.7	623	182.3	45.9	966	101.4	7	27.7	336
03.06.2016 12:30:43	84.8	30	26.4	319.5	89.2	35.2	972	54.8	3.6	26.4	342
03.06.2016 12:30:49	106.7	34	26.9	122	99	43.9	978	72.7	7.1	26.9	348
03.06.2016 12:30:55	119.6	35.4	32	230.9	113.8	47.8	984	84.2	3.4	32	354
03.06.2016 12:31:01	94.4	38.9	30.7	99.7	89.1	48.3	990	55.5	8.2	30.7	360
03.06.2016 12:31:07	102.4	39.5	29	353.6	114.2	50.2	996	62.9	10.5	29	366
03.06.2016 12:31:13	78.2	26.7	24.8	388.9	100.9	29.3	1002	51.5	1.9	24.8	372
03.06.2016 12:31:19	96.9	37.8	27.9	107.6	90.4	47.3	1008	59.1	9.9	27.9	378
03.06.2016 12:31:25	97.1	33.9	26.9	208.2	111	43.7	1014	63.2	7	26.9	384
03.06.2016 12:31:31	80.8	33.7	25.7	118.6	83.5	42.9	1020	47.1	8	25.7	390
03.06.2016 12:31:37	105.7	33.1	25.5	195.6	109.8	41.3	1026	72.6	7.6	25.5	396
03.06.2016 12:31:43	69.5	35.6	31	70.2	65	41.7	1032	33.9	4.6	31	402
03.06.2016 12:31:49	71	33.7	29.8	166.5	80.9	39.4	1038	37.3	3.9	29.8	408
03.06.2016 12:31:55	78.1	35.7	31.9	83.5	74.9	44.7	1044	42.4	3.8	31.9	414
03.06.2016 12:32:01	66.7	34.7	29.1	67.4	62.3	40.3	1050	32	5.6	29.1	420
03.06.2016 12:32:07	86	37.2	27.8	95.9	80.5	43.1	1056	48.8	9.4	27.8	426
03.06.2016 12:32:13	67.1	30.7	27.6	254.6	65.7	36.4	1062	36.4	3.1	27.6	432
03.06.2016 12:32:19	57	33.2	27.9	62.3	53.7	36.1	1068	23.8	5.3	27.9	438
03.06.2016 12:32:25	54.6	26.4	24.9	59.9	50.8	29.5	1074	28.2	1.5	24.9	444
03.06.2016 12:32:31	59	33.8	27.8	64.7	54.9	36.4	1080	25.2	6	27.8	450
03.06.2016 12:32:37	39.3	30.2	26.3	76.8	46.5	32.6	1086	9.1	3.9	26.3	456
03.06.2016 12:32:43	54.1	32.2	25.8	75.7	59.1	37.1	1092	21.9	6.4	25.8	462
03.06.2016 12:32:49	42.9	27.4	24.7	47.9	41.9	30.1	1098	15.5	2.7	24.7	468
03.06.2016 12:32:55	40	27.2	23.2	77.5	47.2	31.6	1104	12.8	4	23.2	474
03.06.2016 12:33:01	41.6	29.4	26.9	41.6	41.1	33.1	1110	12.2	2.5	26.9	480
03.06.2016 12:33:07	42	35.1	28	42	41.9	37.5	1116	6.9	7.1	28	486
03.06.2016 12:33:13	35.1	26.3	22.8	35.1	34.2	28.1	1122	8.8	3.5	22.8	492
03.06.2016 12:33:19	54.9	22.1	20.8	55.2	50.4	27	1128	32.8	1.3	20.8	498
03.06.2016 12:33:25	42	26.1	24.1	84.8	47.2	27.2	1134	15.9	2	24.1	504
03.06.2016 12:33:31	33.4	27.6	24	33.4	33.3	29.8	1140	5.8	3.6	24	510
03.06.2016 12:33:37	42	24.7	23.4	42.7	38.6	26.2	1146	17.3	1.3	23.4	516
03.06.2016 12:33:43	27.5	27.5	26.4	27.5	27.5	27.5	1152	0	1.1	26.4	522
03.06.2016 12:33:49	46.6	32.6	28.1	46.9	44.7	35	1158	14	4.5	28.1	528
03.06.2016 12:33:55	49.6	37	34.7	49.9	47.8	39.1	1164	12.6	2.3	34.7	534
03.06.2016 12:34:01	48.3	48.2	47.5	48.3	48.3	48.3	1170	0.1	0.7	47.5	540
03.06.2016 12:34:07	51.3	46.1	44.2	51.3	51.1	47.7	1176	5.2	1.9	44.2	546
03.06.2016 12:34:13	51.2	45.6	41.5	51.2	50.9	47.1	1182	5.6	4.1	41.5	552
03.06.2016 12:34:19	48.1	35.2	34.5	53.1	46.5	36	1188	12.9	0.7	34.5	558
03.06.2016 12:34:25	37.8	37.8	37.2	37.8	37.8	37.8	1194	0	0.6	37.2	564
03.06.2016 12:34:31	26.6	26.6	25.6	26.6	26.6	26.6	1200	0	1	25.6	570
03.06.2016 12:34:37	46.6	26.9	24.2	47.3	43	28.8	1206	19.7	2.7	24.2	576
03.06.2016 12:34:43	30.6	21.1	19.6	35.6	29.8	22.1	1212	9.5	1.5	19.6	582
03.06.2016 12:34:49	43.1	34.8	31.7	43.1	42.2	36.4	1218	8.3	3.1	31.7	588
03.06.2016 12:34:55	36.4	31.2	25.7	36.4	36.3	33.1	1224	5.2	5.5	25.7	594
03.06.2016 12:35:01	38.7	28	24.8	43.7	37.8	29.2	1230	10.7	3.2	24.8	600
03.06.2016 12:35:07	33.1	23	21.4	55.1	38.1	24.3	1236	10.1	1.6	21.4	606
03.06.2016 12:35:13	36.6	26.1	24	36.6	35.4	27.7	1242	10.5	2.1	24	612
03.06.2016 12:35:19	29.6	24.2	22	29.6	29.5	26.2	1248	5.4	2.2	22	618
03.06.2016 12:35:25	28	25.9	22.8	28	28	26.9	1254	2.1	3.1	22.8	624
03.06.2016 12:35:31	37.7	24.1	22.2	75.6	43.2	25.4	1260	13.6	1.9	22.2	630
03.06.2016 12:35:37	26.4	24	22.7	26.4	26.4	25.1	1266	2.4	1.3	22.7	636
03.06.2016 12:35:43	41.2	26.2	23.8	41.2	39.5	29.1	1272	15	2.4	23.8
03.06.2016 12:35:49	28	24.5	24	28	27.9	26	1278	3.5	0.5	24
03.06.2016 12:35:55	39.3	27	24.9	87.5	51.6	28	1284	12.3	2.1	24.9
03.06.2016 12:36:01	33.3	28.5	26.5	33.3	33.1	29.9	1290	4.8	2	26.5
03.06.2016 12:36:07	39.5	29.9	26.5	39.5	39	32.8	1296	9.6	3.4	26.5
03.06.2016 12:36:13	51	28.9	27.2	56	49.1	32.4	1302	22.1	1.7	27.2
03.06.2016 12:36:19	33.2	24.5	23.5	33.2	32.3	26.3	1308	8.7	1	23.5
03.06.2016 12:36:25	32.4	29.2	23.7	32.4	32.4	30.6	1314	3.2	5.5	23.7
03.06.2016 12:36:31	47	28	26.3	56.9	45.2	29.3	1320	19	1.7	26.3
03.06.2016 12:36:37	40	28.1	25.1	40.3	38	29.6	1326	11.9	3	25.1
03.06.2016 12:36:43	35.9	28.6	27.5	135.5	40.2	29.8	1332	7.3	1.1	27.5
03.06.2016 12:36:49	37.9	30.3	24.9	37.9	37.5	32.3	1338	7.6	5.4	24.9
03.06.2016 12:36:55	34.2	34	31.4	34.2	34.2	34	1344	0.2	2.6	31.4
03.06.2016 12:37:01	26.5	26.5	25.8	26.5	26.5	26.5	1350	0	0.7	25.8
03.06.2016 12:37:07	31	31	30.9	31	31	31	1356	0	0.1	30.9
03.06.2016 12:37:13	34.3	30.7	29	34.3	34	31.3	1362	3.6	1.7	29
03.06.2016 12:37:19	26.2	26.1	24.7	26.2	26.2	26.2	1368	0.1	1.4	24.7
03.06.2016 12:37:25	32.7	28.8	27.4	32.7	32.4	29.5	1374	3.9	1.4	27.4
03.06.2016 12:37:31	24.5	24.5	24.2	24.5	24.5	24.5	1380	0	0.3	24.2
03.06.2016 12:37:37	27.6	25.9	22.6	65.2	35.3	26.7	1386	1.7	3.3	22.6
03.06.2016 12:37:43	31.9	23.9	21.5	53.5	37.7	25.2	1392	8	2.4	21.5
03.06.2016 12:37:49	22.9	22.9	22.6	22.9	22.9	22.9	1398	0	0.3	22.6
03.06.2016 12:37:55	31.2	27.1	22.7	31.2	30.9	27.9	1404	4.1	4.4	22.7
03.06.2016 12:38:01	34.1	27.8	25.2	34.1	33.8	29.5	1410	6.3	2.6	25.2
03.06.2016 12:38:07	27.5	26.4	25	27.5	27.5	26.9	1416	1.1	1.4	25
03.06.2016 12:38:13	36.4	26.3	24.9	36.4	35.2	27.7	1422	10.1	1.4	24.9
03.06.2016 12:38:19	33.7	27.5	25.3	33.7	32.9	28.6	1428	6.2	2.2	25.3
03.06.2016 12:38:25	27.9	25.4	22.9	27.9	27.9	26.5	1434	2.5	2.5	22.9
03.06.2016 12:38:31	27.6	27.5	26.7	27.6	27.6	27.5	1440	0.1	0.8	26.7
03.06.2016 12:38:37	33.5	29.6	25.9	33.5	33.4	31	1446	3.9	3.7	25.9
03.06.2016 12:38:43	42.6	26.8	24.9	42.9	40	28.6	1452	15.8	1.9	24.9
03.06.2016 12:38:49	44.8	26.6	24.4	45.5	41.2	28.2	1458	18.2	2.2	24.4
03.06.2016 12:38:55	24.7	24.6	24	24.7	24.7	24.6	1464	0.1	0.6	24
03.06.2016 12:39:01	30.5	28.9	26.3	30.5	30.5	29.6	1470	1.6	2.6	26.3
03.06.2016 12:39:07	38.6	26.5	23.6	38.9	36.8	28.5	1476	12.1	2.9	23.6
03.06.2016 12:39:13	35	25.4	23.5	40	34.1	26.4	1482	9.6	1.9	23.5
03.06.2016 12:39:19	25.7	25.6	24	25.7	25.7	25.6	1488	0.1	1.6	24
03.06.2016 12:39:25	30.6	25.6	25.4	30.6	30.5	27.1	1494	5	0.2	25.4
03.06.2016 12:39:31	38	27.4	25.8	38.4	36.2	28.7	1500	10.6	1.6	25.8
03.06.2016 12:39:37	25	25	24.8	25	25	25	1506	0	0.2	24.8
03.06.2016 12:39:43	33.2	25.3	23.9	33.5	31.6	26.1	1512	7.9	1.4	23.9
03.06.2016 12:39:49	27.1	25.1	23.4	27.1	27	25.6	1518	2	1.7	23.4
03.06.2016 12:39:55	36.7	25.2	24.9	37	34.9	26.9	1524	11.5	0.3	24.9
03.06.2016 12:40:01	24.4	24.4	24.4	24.4	24.4	24.4	1530	0	0	24.4
03.06.2016 12:40:07	25.3	25.3	25	25.3	25.3	25.3	1536	0	0.3	25
03.06.2016 12:40:13	25.2	25.2	24.7	25.2	25.2	25.2	1542	0	0.5	24.7
03.06.2016 12:40:19	26.5	25.9	24.6	26.5	26.5	26.2	1548	0.6	1.3	24.6
03.06.2016 12:40:25	26.8	25	24.2	26.8	26.8	25.4	1554	1.8	0.8	24.2
03.06.2016 12:40:31	25.3	25.3	25.2	25.3	25.3	25.3	1560	0	0.1	25.2
03.06.2016 12:40:37	23.6	23.6	23.3	23.6	23.6	23.5	1566	0	0.3	23.3
03.06.2016 12:40:43	24.5	23.2	21.3	24.5	24.5	23.8	1572	1.3	1.9	21.3
03.06.2016 12:40:49	24.8	24.8	24	24.8	24.8	24.8	1578	0	0.8	24
03.06.2016 12:40:55	28.3	27.7	25.6	28.3	28.3	28	1584	0.6	2.1	25.6
03.06.2016 12:41:01	28.9	25.5	23.4	28.9	28.8	27	1590	3.4	2.1	23.4
03.06.2016 12:41:07	24.5	24.3	22.9	24.5	24.5	24.4	1596	0.2	1.4	22.9
03.06.2016 12:41:13	30	27.4	23.2	30	30	28.5	1602	2.6	4.2	23.2
03.06.2016 12:41:19	35.9	24.7	21.2	35.9	35	27.2	1608	11.2	3.5	21.2
03.06.2016 12:41:25	34.7	23.6	22.3	56.6	39.6	25	1614	11.1	1.3	22.3
03.06.2016 12:41:31	23.2	23.1	22.1	23.2	23.2	23.1	1620	0.1	1	22.1
03.06.2016 12:41:37	18	18	17.6	18	18	18	1626	0	0.4	17.6
03.06.2016 12:41:43	24.1	21.4	20.5	24.1	24.1	22.3	1632	2.7	0.9	20.5
03.06.2016 12:41:49	24.8	24.7	22.7	24.8	24.8	24.7	1638	0.1	2	22.7
03.06.2016 12:41:55	24.3	24	22.8	24.3	24.3	24.1	1644	0.3	1.2	22.8
03.06.2016 12:42:01	23.2	23.1	21.8	23.2	23.2	23.1	1650	0.1	1.3	21.8
03.06.2016 12:42:07	28.5	26.4	23.9	28.5	28.5	27.3	1656	2.1	2.5	23.9
03.06.2016 12:42:13	31.1	22.4	21.2	36.1	30.2	23.1	1662	8.7	1.2	21.2
03.06.2016 12:42:19	21.1	21.1	20.6	21.1	21.1	21.1	1668	0	0.5	20.6
03.06.2016 12:42:25	28.3	25.3	23.1	28.3	28.3	26.6	1674	3	2.2	23.1
03.06.2016 12:42:31	24.7	22.6	21.3	24.7	24.7	23.5	1680	2.1	1.3	21.3
03.06.2016 12:42:37	21.7	21.7	21.4	21.7	21.7	21.7	1686	0	0.3	21.4
03.06.2016 12:42:43	21.8	21.8	21.8	21.8	21.8	21.8	1692	0	0	21.8
03.06.2016 12:42:49	28.7	23.7	21.8	28.7	28.5	25.2	1698	5	1.9	21.8
03.06.2016 12:42:55	27.8	20.6	20	28.1	26.1	21.1	1704	7.2	0.6	20
03.06.2016 12:43:01	22.7	22.6	22	22.7	22.7	22.6	1710	0.1	0.6	22
03.06.2016 12:43:07	26.8	22.2	21.6	26.8	26.6	23.5	1716	4.6	0.6	21.6
03.06.2016 12:43:13	29.1	22.2	21.1	29.4	27.4	22.5	1722	6.9	1.1	21.1
03.06.2016 12:43:19	28.6	25.1	24	28.6	28.3	25.6	1728	3.5	1.1	24
03.06.2016 12:43:25	24.2	24.1	23.3	24.2	24.2	24.2	1734	0.1	0.8	23.3
03.06.2016 12:43:31	25.1	24.3	22.2	25.1	25.1	24.6	1740	0.8	2.1	22.2
03.06.2016 12:43:37	31	22	21.8	31	29.8	23.3	1746	9	0.2	21.8
03.06.2016 12:43:43	36.7	25.4	21.5	41.7	35.6	26.2	1752	11.3	3.9	21.5
03.06.2016 12:43:49	24	22.6	21.9	24	24	23.3	1758	1.4	0.7	21.9
03.06.2016 12:43:55	35.4	24.4	23	35.7	33.4	25.6	1764	11	1.4	23
03.06.2016 12:44:01	27.3	24.3	22.1	27.3	27.2	25.3	1770	3	2.2	22.1
03.06.2016 12:44:07	24.3	21.8	20.9	24.3	24.3	22.9	1776	2.5	0.9	20.9
03.06.2016 12:44:13	24.7	23.9	22.5	24.7	24.7	24.3	1782	0.8	1.4	22.5
03.06.2016 12:44:19	23.6	21.8	20.9	23.6	23.5	22.2	1788	1.8	0.9	20.9
03.06.2016 12:44:25	19.1	19	18.4	19.1	19.1	19	1794	0.1	0.6	18.4
03.06.2016 12:44:31	24.1	23	20.5	24.1	24.1	23.5	1800	1.1	2.5	20.5
03.06.2016 12:44:37	18.9	18.9	18.7	18.9	18.9	18.9	1806	0	0.2	18.7
03.06.2016 12:44:43	18.6	18.6	18.6	18.6	18.6	18.6	1812	0	0	18.6
03.06.2016 12:44:49	21.6	19.5	18	21.6	21.6	20.4	1818	2.1	1.5	18
03.06.2016 12:44:55	18.5	18	17.3	18.5	18.5	18.2	1824	0.5	0.7	17.3
03.06.2016 12:45:01	22.2	20.7	19.4	22.2	22.2	21.4	1830	1.5	1.3	19.4
03.06.2016 12:45:07	23	21.5	20.1	23	23	22.2	1836	1.5	1.4	20.1
03.06.2016 12:45:13	21.8	21.6	20.8	21.8	21.8	21.7	1842	0.2	0.8	20.8
03.06.2016 12:45:19	28.1	25.6	22.7	28.1	28.1	26.7	1848	2.5	2.9	22.7
03.06.2016 12:45:25	25.8	23	22.2	25.8	25.7	23.9	1854	2.8	0.8	22.2
03.06.2016 12:45:31	25.4	24.1	22.8	25.4	25.4	24.7	1860	1.3	1.3	22.8
03.06.2016 12:45:37	23.7	23.7	23.7	23.7	23.7	23.7	1866	0	0	23.7
03.06.2016 12:45:43	23.6	23.6	23.3	23.6	23.6	23.6	1872	0	0.3	23.3
03.06.2016 12:45:49	33.6	30.3	28.6	33.6	33.3	30.8	1878	3.3	1.7	28.6
03.06.2016 12:45:55	30	23.5	23	30	29.2	24.7	1884	6.5	0.5	23
03.06.2016 12:46:01	23.1	23.1	22.6	23.1	23.1	23.1	1890	0	0.5	22.6
03.06.2016 12:46:07	30.1	28.8	26.9	30.1	30.1	29.4	1896	1.3	1.9	26.9
03.06.2016 12:46:13	22.5	22.5	22.4	22.5	22.5	22.5	1902	0	0.1	22.4

## Sheet: 11OS
date & time	PM10 [ug/m3]	PM2,5 [ug/m3]	PM1 [ug/m3]	Inhalable [ug/m3]	Thoracic [ug/m3]	Alveolic [ug/m3]	Zeit in sek	2.5 bis 10	1 bis 2.5	kleiner 1
06.06.2016 08:43:14	31.9	28.1	25.2	31.9	31.8	29.8	6	3.8	2.9	25.2			Sägedauer	102			Temperature [°C]	Humidity [%rH]
06.06.2016 08:43:20	30.2	26.7	24	30.2	30.1	27.9	12	3.5	2.7	24							24.09	53.64
06.06.2016 08:43:26	29.8	27.3	24.4	29.8	29.7	28.4	18	2.5	2.9	24.4							24.09	53.75
06.06.2016 08:43:32	29	26.2	24.7	29	29	27.4	24	2.8	1.5	24.7							24	53.96
06.06.2016 08:43:38	25.8	25.8	25.3	25.8	25.8	25.8	30	0	0.5	25.3							23.9	53.96
06.06.2016 08:43:44	25.5	25.4	24.8	25.5	25.5	25.5	36	0.1	0.6	24.8							23.81	52.6
06.06.2016 08:43:50	37.4	26.5	25.3	59.4	42.1	27.1	42	10.9	1.2	25.3							23.81	52.7
06.06.2016 08:43:56	30.9	28.5	27.2	30.9	30.8	29.6	48	2.4	1.3	27.2							23.81	51.76
06.06.2016 08:44:02	29.1	27.4	25.3	29.1	29.1	28.2	54	1.7	2.1	25.3							23.81	51.14
06.06.2016 08:44:08	24.9	24.9	24.8	24.9	24.9	24.9	60	0	0.1	24.8							23.71	50.72
06.06.2016 08:44:14	52.4	25.5	25.4	584.8	75.7	28.2	66	26.9	0.1	25.4							23.71	52.29
06.06.2016 08:44:20	33.7	30.2	28.2	215.5	36.7	31.8	72	3.5	2	28.2							23.52	53.02
06.06.2016 08:44:26	32.6	28.5	25.5	32.6	32.6	30.3	78	4.1	3	25.5							23.52	54.06
06.06.2016 08:44:32	24.3	24.3	24.1	24.3	24.3	24.3	84	0	0.2	24.1							23.52	56.36
06.06.2016 08:44:38	32.8	28.6	25.4	32.8	32.7	30.1	90	4.2	3.2	25.4							23.42	56.88
06.06.2016 08:44:44	28.6	25.2	24	28.6	28.5	26.4	96	3.4	1.2	24							23.42	56.78
06.06.2016 08:44:50	24.6	24.6	24.4	24.6	24.6	24.6	102	0	0.2	24.4							23.42	56.88
06.06.2016 08:44:56	37.2	23.4	22.6	37.5	34.9	24.8	108	13.8	0.8	22.6							23.42	56.15
06.06.2016 08:45:02	25.2	24	23.3	25.2	25.2	24.6	114	1.2	0.7	23.3							23.42	54.69
06.06.2016 08:45:08	32.3	28.9	26.5	32.3	32.2	30.1	120	3.4	2.4	26.5							23.42	52.29
06.06.2016 08:45:14	25.2	25.1	24.2	25.2	25.2	25.1	126	0.1	0.9	24.2							23.42	51.76
06.06.2016 08:45:20	31	24.3	23.2	31	30.2	25.5	132	6.7	1.1	23.2							23.33	50.93
06.06.2016 08:45:26	27.9	26.5	25.5	27.9	27.9	27.1	138	1.4	1	25.5							23.33	51.03
06.06.2016 08:45:32	25.1	24.8	23	25.1	25.1	24.9	144	0.3	1.8	23							23.33	52.7
06.06.2016 08:45:38	26.7	24.3	23.2	26.7	26.7	25.4	150	2.4	1.1	23.2							23.33	54.27
06.06.2016 08:45:44	25.5	25.5	24.9	25.5	25.5	25.5	156	0	0.6	24.9							23.23	55.42
06.06.2016 08:45:50	26.6	24.7	23.3	26.6	26.6	25.6	162	1.9	1.4	23.3							23.33	56.78
06.06.2016 08:45:56	33.5	24.3	23.1	38.5	32.7	25.2	168	9.2	1.2	23.1							23.33	57.92
06.06.2016 08:46:02	28.3	23.6	23	28.3	27.5	24	174	4.7	0.6	23							23.33	57.61
06.06.2016 08:46:08	25.1	24.6	23	25.1	25.1	24.8	180	0.5	1.6	23							23.33	57.19
06.06.2016 08:46:14	42.4	28.4	27.4	43.1	39.2	29.2	186	14	1	27.4							23.33	56.67
06.06.2016 08:46:20	29.3	26.1	24.9	29.3	29.2	27.2	192	3.2	1.2	24.9							23.33	56.05
06.06.2016 08:46:26	23.9	23.9	23.7	23.9	23.9	23.9	198	0	0.2	23.7							23.42	55.21
06.06.2016 08:46:32	26.6	24.5	23.5	84.2	33.4	25.4	204	2.1	1	23.5							23.42	54.69
06.06.2016 08:46:38	33.9	22.8	21.7	55.9	38.8	24.2	210	11.1	1.1	21.7							23.42	53.12
06.06.2016 08:46:44	54.1	27.6	25.4	64.1	51.3	29.9	216	26.5	2.2	25.4							23.42	52.29
06.06.2016 08:46:50	42.9	26.6	24.3	52.9	41.3	27.4	222	16.3	2.3	24.3							23.42	53.33
06.06.2016 08:46:56	25.5	24.1	22.6	162.6	38.4	24.7	228	1.4	1.5	22.6
06.06.2016 08:47:02	39.5	24.3	23.5	77	44.7	25.5	234	15.2	0.8	23.5
06.06.2016 08:47:08	31	28.1	24.5	31	31	29.4	240	2.9	3.6	24.5
06.06.2016 08:47:14	35.4	23.9	23.2	40.4	34.5	25.4	246	11.5	0.7	23.2
06.06.2016 08:47:20	25.9	24.9	24.3	63.4	33.6	25.4	252	1	0.6	24.3
06.06.2016 08:47:26	25.7	25.6	24.4	25.7	25.7	25.6	258	0.1	1.2	24.4
06.06.2016 08:47:32	25.1	25.1	24.7	25.1	25.1	25.1	264	0	0.4	24.7
06.06.2016 08:47:38	37.2	24.2	23.9	42.1	35.9	25.4	270	13	0.3	23.9
06.06.2016 08:47:44	24.6	24.6	24.3	24.6	24.6	24.6	276	0	0.3	24.3
06.06.2016 08:47:50	33.3	29.6	26.4	33.3	33.2	30.9	282	3.7	3.2	26.4
06.06.2016 08:47:56	29.5	26.1	24.2	29.5	29.4	27.3	288	3.4	1.9	24.2
06.06.2016 08:48:02	34.7	26.2	24.2	39.7	33.9	26.8	294	8.5	2	24.2
06.06.2016 08:48:08	30.1	27.4	24.9	30.1	30	28.2	300	2.7	2.5	24.9
06.06.2016 08:48:14	26.8	26.2	24.3	26.8	26.8	26.5	306	0.6	1.9	24.3
06.06.2016 08:48:20	28.9	26.6	24.6	28.9	28.9	27.6	312	2.3	2	24.6
06.06.2016 08:48:26	29.9	27.5	26	51.5	36.5	28.1	318	2.4	1.5	26
06.06.2016 08:48:32	32.6	29.5	26.1	54.2	39.2	30.4	324	3.1	3.4	26.1
06.06.2016 08:48:38	28.9	27.5	26.2	28.9	28.9	28.1	330	1.4	1.3	26.2
06.06.2016 08:48:44	32.5	28.8	25.1	32.5	32.5	30.1	336	3.7	3.7	25.1
06.06.2016 08:48:50	25.2	25.2	24.9	25.2	25.2	25.2	342	0	0.3	24.9
06.06.2016 08:48:56	38.8	30.2	29.7	39.2	37.2	31.3	348	8.6	0.5	29.7
06.06.2016 08:49:02	30	26.6	26	30	29.9	27.7	354	3.4	0.6	26
06.06.2016 08:49:08	26.2	26.2	26.1	26.2	26.2	26.2	360	0	0.1	26.1
06.06.2016 08:49:14	29.6	27.2	25.2	29.6	29.5	27.9	366	2.4	2	25.2
06.06.2016 08:49:20	36.8	26.9	24.4	36.8	35.2	27.9	372	9.9	2.5	24.4
06.06.2016 08:49:26	23.8	23.8	23.5	23.8	23.8	23.8	378	0	0.3	23.5
06.06.2016 08:49:32	36.1	24.7	24.3	36.5	33.7	25.3	384	11.4	0.4	24.3
06.06.2016 08:49:38	26.8	25.6	24.3	26.8	26.8	26.1	390	1.2	1.3	24.3
06.06.2016 08:49:44	33.6	26.4	24.8	55.2	40.1	28.8	396	7.2	1.6	24.8
06.06.2016 08:49:50	24.4	24.4	24.1	24.4	24.4	24.4	402	0	0.3	24.1
06.06.2016 08:49:56	35.8	26.3	23.9	36.1	34.1	27.4	408	9.5	2.4	23.9
06.06.2016 08:50:02	30.8	26.3	23.5	30.8	30.5	27.3	414	4.5	2.8	23.5
06.06.2016 08:50:08	25.7	25.7	25.3	25.7	25.7	25.7	420	0	0.4	25.3
06.06.2016 08:50:14	33.9	27.4	24.7	33.9	33.1	28.6	426	6.5	2.7	24.7
06.06.2016 08:50:20	30.6	26.7	24.5	30.6	30.3	27.4	432	3.9	2.2	24.5
06.06.2016 08:50:26	35.7	29.6	24.9	35.7	35.4	31.3	438	6.1	4.7	24.9
06.06.2016 08:50:32	30.5	26.6	24.8	30.5	30.2	27.3	444	3.9	1.8	24.8
06.06.2016 08:50:38	35.5	27.6	24.5	35.5	35	29.4	450	7.9	3.1	24.5
06.06.2016 08:50:44	31.8	28.2	25.4	31.8	31.7	29.5	456	3.6	2.8	25.4
06.06.2016 08:50:50	25.3	25.3	25.3	25.3	25.3	25.3	462	0	0	25.3
06.06.2016 08:50:56	29.9	28.4	25.6	29.9	29.9	29.1	468	1.5	2.8	25.6
06.06.2016 08:51:02	29.1	26.6	25.4	29.1	29.1	27.7	474	2.5	1.2	25.4
06.06.2016 08:51:08	36.4	28.2	26.1	41.3	35.5	28.6	480	8.2	2.1	26.1
06.06.2016 08:51:14	34.9	25.3	23.4	39.9	34	26	486	9.6	1.9	23.4
06.06.2016 08:51:20	24.4	24.4	23.9	24.4	24.4	24.4	492	0	0.5	23.9
06.06.2016 08:51:26	24.2	24.2	23.6	24.2	24.2	24.2	498	0	0.6	23.6
06.06.2016 08:51:32	30	26.2	23.8	51.6	36.6	27.4	504	3.8	2.4	23.8
06.06.2016 08:51:38	25.4	25.4	24.5	25.4	25.4	25.4	510	0	0.9	24.5
06.06.2016 08:51:44	35.5	26.4	24.8	35.8	33.8	27.4	516	9.1	1.6	24.8
06.06.2016 08:51:50	32.2	25.1	24.3	32.2	31.4	26.5	522	7.1	0.8	24.3
06.06.2016 08:51:56	26.5	25.8	23.8	26.5	26.5	26.1	528	0.7	2	23.8
06.06.2016 08:52:02	29.5	26.8	24.4	29.5	29.4	27.6	534	2.7	2.4	24.4
06.06.2016 08:52:08	36.3	26.7	25	41.3	35.4	27.7	540	9.6	1.7	25
06.06.2016 08:52:14	28.8	27.2	25.5	28.8	28.8	27.9	546	1.6	1.7	25.5
06.06.2016 08:52:20	24.6	24.6	24.5	24.6	24.6	24.6	552	0	0.1	24.5
06.06.2016 08:52:26	28.8	25.7	24	28.8	28.8	27.1	558	3.1	1.7	24
06.06.2016 08:52:32	29.9	25.4	25	211.7	32.8	26.7	564	4.5	0.4	25
06.06.2016 08:52:38	25.7	23.7	22.9	25.7	25.6	24.2	570	2	0.8	22.9
06.06.2016 08:52:44	24.6	24.6	24.4	24.6	24.6	24.6	576	0	0.2	24.4
06.06.2016 08:52:50	29.6	27.7	24.4	29.6	29.6	28.6	582	1.9	3.3	24.4
06.06.2016 08:52:56	25	25	24.6	25	25	25	588	0	0.4	24.6
06.06.2016 08:53:02	25.5	24.3	23.7	25.5	25.5	24.8	594	1.2	0.6	23.7
06.06.2016 08:53:08	26.8	25.7	24.9	26.8	26.8	26.2	600	1.1	0.8	24.9
06.06.2016 08:53:14	29.1	26.3	25.1	29.1	29	27.2	606	2.8	1.2	25.1
06.06.2016 08:53:20	22.8	22.8	22.6	22.8	22.8	22.8	612	0	0.2	22.6
06.06.2016 08:53:26	24	24	23.5	24	24	24	618	0	0.5	23.5
06.06.2016 08:53:32	28.2	24.3	23.3	49.8	34.8	25.2	624	3.9	1	23.3
06.06.2016 08:53:38	22.9	22.9	22.8	22.9	22.9	22.9	630	0	0.1	22.8
06.06.2016 08:53:44	23.9	23.4	22.4	23.9	23.9	23.6	636	0.5	1	22.4
06.06.2016 08:53:50	21.7	21.7	21.2	21.7	21.7	21.7	642	0	0.5	21.2
06.06.2016 08:53:56	24.5	24.2	23.2	24.5	24.5	24.3	648	0.3	1	23.2
06.06.2016 08:54:02	23.9	23.6	22.9	23.9	23.9	23.7	654	0.3	0.7	22.9
06.06.2016 08:54:08	26.4	24.3	22.2	48	33	24.8	660	2.1	2.1	22.2
06.06.2016 08:54:14	22.7	22.7	22.7	22.7	22.7	22.7	666	0	0	22.7
06.06.2016 08:54:20	23.4	23.1	22.2	23.4	23.4	23.2	672	0.3	0.9	22.2
06.06.2016 08:54:26	22.7	22.7	22.2	22.7	22.7	22.7	678	0	0.5	22.2
06.06.2016 08:54:32	21.9	21.9	21.9	21.9	21.9	21.9	684	0	0	21.9
06.06.2016 08:54:38	37.5	22.8	21.2	42.8	35	23.4	690	14.7	1.6	21.2
06.06.2016 08:54:44	20.7	20.7	20.7	20.7	20.7	20.7	696	0	0	20.7
06.06.2016 08:54:50	23.4	23	22.3	23.4	23.4	23.2	702	0.4	0.7	22.3
06.06.2016 08:54:56	22.7	22.6	22.2	22.7	22.7	22.7	708	0.1	0.4	22.2
06.06.2016 08:55:02	21.9	21.9	21.9	21.9	21.9	21.9	714	0	0	21.9
06.06.2016 08:55:08	21.6	21.6	21.6	21.6	21.6	21.6	720	0	0	21.6
06.06.2016 08:55:14	21.8	21.8	21.6	21.8	21.8	21.8	726	0	0.2	21.6
06.06.2016 08:55:20	22.1	21.8	21.1	22.1	22.1	21.9	732	0.3	0.7	21.1
06.06.2016 08:55:26	27.3	24.6	21.6	27.3	27.2	25.5	738	2.7	3	21.6
06.06.2016 08:55:32	23.5	22.2	21.7	45.1	30.1	22.3	744	1.3	0.5	21.7
06.06.2016 08:55:38	21.8	21.8	21.7	21.8	21.8	21.8	750	0	0.1	21.7	0
06.06.2016 08:55:44	22.8	21.9	19.8	22.8	22.8	22.3	756	0.9	2.1	19.8	6
06.06.2016 08:55:50	21.2	21.2	20.9	21.2	21.2	21.2	762	0	0.3	20.9	12
06.06.2016 08:55:56	20.9	20.9	20.8	20.9	20.9	20.9	768	0	0.1	20.8	18
06.06.2016 08:56:02	22.2	21.9	21.3	22.2	22.2	22	774	0.3	0.6	21.3	24
06.06.2016 08:56:08	22.1	22.1	21.6	22.1	22.1	22.1	780	0	0.5	21.6	30
06.06.2016 08:56:14	23	22.7	21.8	23	23	22.8	786	0.3	0.9	21.8	36
06.06.2016 08:56:20	20.7	20.7	20.3	20.7	20.7	20.7	792	0	0.4	20.3	42
06.06.2016 08:56:26	24.1	23.2	21.1	24.1	24.1	23.6	798	0.9	2.1	21.1	48
06.06.2016 08:56:32	21.9	21.9	21.9	21.9	21.9	21.9	804	0	0	21.9	54
06.06.2016 08:56:38	22.7	22.3	21.1	22.7	22.7	22.5	810	0.4	1.2	21.1	60
06.06.2016 08:56:44	27.9	24.7	22.1	27.9	27.9	25.8	816	3.2	2.6	22.1	66
06.06.2016 08:56:50	24	23.9	23	24	24	23.9	822	0.1	0.9	23	72
06.06.2016 08:56:56	23.5	23.5	23.1	23.5	23.5	23.5	828	0	0.4	23.1	78
06.06.2016 08:57:02	23.3	23.3	22.7	23.3	23.3	23.3	834	0	0.6	22.7	84
06.06.2016 08:57:08	28.4	23.8	22.7	50	34.7	24.4	840	4.6	1.1	22.7	90
06.06.2016 08:57:14	24.4	23.8	22.7	24.4	24.4	24.1	846	0.6	1.1	22.7	96
06.06.2016 08:57:20	23.2	23	22.3	23.2	23.2	23.1	852	0.2	0.7	22.3	102
06.06.2016 08:57:26	24.3	24	22.8	24.3	24.3	24.1	858	0.3	1.2	22.8	108
06.06.2016 08:57:32	24.5	24.5	24.5	24.5	24.5	24.5	864	0	0	24.5	114
06.06.2016 08:57:38	23.3	23.2	22.3	23.3	23.3	23.2	870	0.1	0.9	22.3	120
06.06.2016 08:57:44	25.2	24.2	22.5	25.2	25.2	24.7	876	1	1.7	22.5	126
06.06.2016 08:57:50	23.7	23.5	22.5	23.7	23.7	23.5	882	0.2	1	22.5	132
06.06.2016 08:57:56	25.9	24.2	23.2	25.9	25.9	24.9	888	1.7	1	23.2	138
06.06.2016 08:58:02	21.8	21.8	21.4	21.8	21.8	21.8	894	0	0.4	21.4	144
06.06.2016 08:58:08	26.1	23.3	22.6	26.1	26	24.2	900	2.8	0.7	22.6	150
06.06.2016 08:58:14	26.4	22.9	22.2	26.4	26.3	24.1	906	3.5	0.7	22.2	156
06.06.2016 08:58:20	22.8	22.8	22.7	22.8	22.8	22.8	912	0	0.1	22.7	162
06.06.2016 08:58:26	23.8	21.9	21.1	23.8	23.7	22.4	918	1.9	0.8	21.1	168
06.06.2016 08:58:32	25.1	24.6	23.2	25.1	25.1	24.8	924	0.5	1.4	23.2	174
06.06.2016 08:58:38	27	23.5	23.1	27	26.8	24.3	930	3.5	0.4	23.1	180
06.06.2016 08:58:44	23.6	22.2	21.7	45.1	30.2	22.4	936	1.4	0.5	21.7	186
06.06.2016 08:58:50	23.7	22	21.6	23.7	23.7	22.8	942	1.7	0.4	21.6	192
06.06.2016 08:58:56	38.6	24.1	23.1	39.3	35.3	25.1	948	14.5	1	23.1	198
06.06.2016 08:59:02	22.5	22.5	22.5	22.5	22.5	22.5	954	0	0	22.5	204
06.06.2016 08:59:08	22.4	22.4	22.3	22.4	22.4	22.4	960	0	0.1	22.3	210
06.06.2016 08:59:14	26.1	23.9	22.4	26.1	26.1	24.5	966	2.2	1.5	22.4	216
06.06.2016 08:59:20	22.5	22.4	21.9	22.5	22.5	22.4	972	0.1	0.5	21.9	222
06.06.2016 08:59:26	22.9	22.6	21.8	22.9	22.9	22.7	978	0.3	0.8	21.8	228
06.06.2016 08:59:32	24.6	23.9	22.5	24.6	24.6	24.2	984	0.7	1.4	22.5	234
06.06.2016 08:59:38	28.1	25.7	23	28.1	28	26.7	990	2.4	2.7	23	240
06.06.2016 08:59:44	22.6	22.6	22.5	22.6	22.6	22.6	996	0	0.1	22.5	246
06.06.2016 08:59:50	24.6	23.3	22.7	24.6	24.6	23.9	1002	1.3	0.6	22.7	252
06.06.2016 08:59:56	23.1	23.1	22.6	23.1	23.1	23.1	1008	0	0.5	22.6	258
06.06.2016 09:00:02	25.6	23.5	22	25.6	25.6	24.4	1014	2.1	1.5	22	264
06.06.2016 09:00:08	23.9	23.3	22	23.9	23.9	23.6	1020	0.6	1.3	22	270
06.06.2016 09:00:14	22.2	22.2	22.2	22.2	22.2	22.2	1026	0	0	22.2	276
06.06.2016 09:00:20	22.8	22.7	22.1	22.8	22.8	22.7	1032	0.1	0.6	22.1	282
06.06.2016 09:00:26	22.4	22.3	21.2	22.4	22.4	22.4	1038	0.1	1.1	21.2	288
06.06.2016 09:00:32	24.5	23.1	21.9	46.1	31.1	23.2	1044	1.4	1.2	21.9	294
06.06.2016 09:00:38	22	22	22	22	22	22	1050	0	0	22	300
06.06.2016 09:00:44	21.9	21.8	20.9	21.9	21.9	21.8	1056	0.1	0.9	20.9	306
06.06.2016 09:00:50	21.2	21.2	20.6	21.2	21.2	21.2	1062	0	0.6	20.6	312
06.06.2016 09:00:56	21.3	21.3	21	21.3	21.3	21.3	1068	0	0.3	21	318
06.06.2016 09:01:02	23.4	22.9	21.7	23.4	23.4	23.1	1074	0.5	1.2	21.7	324
06.06.2016 09:01:08	22.7	22.5	21.5	22.7	22.7	22.6	1080	0.2	1	21.5	330
06.06.2016 09:01:14	22.9	22.9	22.7	22.9	22.9	22.9	1086	0	0.2	22.7	336
06.06.2016 09:01:20	28.2	25.3	24.4	28.2	28.2	26.6	1092	2.9	0.9	24.4	342
06.06.2016 09:01:26	44.2	29.6	23.3	44.6	42.2	32	1098	14.6	6.3	23.3	348
06.06.2016 09:01:32	86	47	29.8	90.9	83.3	55.6	1104	39	17.2	29.8	354
06.06.2016 09:01:38	144.3	43.4	27	192.1	143.6	64	1110	100.9	16.4	27	360
06.06.2016 09:01:44	158.4	60.5	32.3	227	153.9	77.6	1116	97.9	28.2	32.3	366
06.06.2016 09:01:50	135	40.9	27.8	449.7	140.9	57.6	1122	94.1	13.1	27.8	372
06.06.2016 09:01:56	151.2	55.5	31.9	183.8	148.2	74	1128	95.7	23.6	31.9	378
06.06.2016 09:02:02	138.4	52.3	35	230.4	156.2	67	1134	86.1	17.3	35	384
06.06.2016 09:02:08	199.1	69.7	38.9	205.8	184.6	95.7	1140	129.4	30.8	38.9	390
06.06.2016 09:02:14	177.4	77.5	38.3	209.6	176.7	102.3	1146	99.9	39.2	38.3	396
06.06.2016 09:02:20	196.3	87.7	44.2	239.5	195	113	1152	108.6	43.5	44.2	402
06.06.2016 09:02:26	207.7	65.2	38.3	250.3	202.6	96.3	1158	142.5	26.9	38.3	408
06.06.2016 09:02:32	121.8	40.9	27.9	686.4	124.9	57.2	1164	80.9	13	27.9	414
06.06.2016 09:02:38	141.9	74.6	35.1	147.2	137	90.9	1170	67.3	39.5	35.1	420
06.06.2016 09:02:44	132	65.3	33.8	137.3	127.3	83.5	1176	66.7	31.5	33.8	426
06.06.2016 09:02:50	126.8	45.6	30	127.8	118	62.5	1182	81.2	15.6	30	432
06.06.2016 09:02:56	122	49.5	28.7	150	118.4	58.9	1188	72.5	20.8	28.7	438
06.06.2016 09:03:02	93.5	47.3	26.9	98.5	90.6	59.5	1194	46.2	20.4	26.9	444
06.06.2016 09:03:08	95.2	41	26.7	101.2	89	51.6	1200	54.2	14.3	26.7	450
06.06.2016 09:03:14	93.5	52.5	30.9	280.4	94.7	63.8	1206	41	21.6	30.9	456
06.06.2016 09:03:20	51.8	31.9	25.6	95	63.9	36.4	1212	19.9	6.3	25.6	462
06.06.2016 09:03:26	82.8	43.3	28.1	83.2	79.6	53	1218	39.5	15.2	28.1	468
06.06.2016 09:03:32	71.2	38.6	26.7	331.7	72	48.8	1224	32.6	11.9	26.7	474
06.06.2016 09:03:38	93.7	41.2	27	99	89.8	53	1230	52.5	14.2	27	480
06.06.2016 09:03:44	91.6	41	28	92.3	85.7	50.8	1236	50.6	13	28	486
06.06.2016 09:03:50	69.2	37.8	27.7	127.1	73.1	45.6	1242	31.4	10.1	27.7	492
06.06.2016 09:03:56	53.3	32.6	24.8	53.7	51.3	37.7	1248	20.7	7.8	24.8	498
06.06.2016 09:04:02	51.3	30.7	25.6	51.7	49.4	36.1	1254	20.6	5.1	25.6	504
06.06.2016 09:04:08	76.6	38.6	26.6	81.9	72.5	45.1	1260	38	12	26.6	510
06.06.2016 09:04:14	73.3	31.3	26.2	145.9	76.7	36.2	1266	42	5.1	26.2	516
06.06.2016 09:04:20	49.8	32.6	26.2	50.2	47.7	35.8	1272	17.2	6.4	26.2	522
06.06.2016 09:04:26	54.6	29.1	24.1	54.9	52.2	34.9	1278	25.5	5	24.1	528
06.06.2016 09:04:32	47.5	34	24.9	47.5	47.3	39.7	1284	13.5	9.1	24.9	534
06.06.2016 09:04:38	34.5	29.1	24	34.5	34.5	31.2	1290	5.4	5.1	24	540
06.06.2016 09:04:44	43.7	32.3	24.6	65.2	49.4	35.2	1296	11.4	7.7	24.6	546
06.06.2016 09:04:50	57.9	25.2	23.4	163.5	57.2	27.6	1302	32.7	1.8	23.4	552
06.06.2016 09:04:56	25.5	25.5	24.2	25.5	25.5	25.5	1308	0	1.3	24.2	558
06.06.2016 09:05:02	33.2	24.2	21.5	54.7	39.4	26.7	1314	9	2.7	21.5	564
06.06.2016 09:05:08	33.5	30.4	24.8	33.5	33.5	31.8	1320	3.1	5.6	24.8	570
06.06.2016 09:05:14	39.8	28.5	24.6	61.4	45.5	30.6	1326	11.3	3.9	24.6	576
06.06.2016 09:05:20	36.4	27	23.8	36.4	36	29.9	1332	9.4	3.2	23.8	582
06.06.2016 09:05:26	39.7	29.9	24.6	39.7	38.8	32.2	1338	9.8	5.3	24.6	588
06.06.2016 09:05:32	33	28.5	23.2	33	33	30.6	1344	4.5	5.3	23.2	594
06.06.2016 09:05:38	35.3	23.8	22.3	40.2	34.3	25.3	1350	11.5	1.5	22.3	600
06.06.2016 09:05:44	31	26.1	24	52.6	37.6	27.9	1356	4.9	2.1	24	606
06.06.2016 09:05:50	43.3	26.2	22.8	48.6	40.8	27.8	1362	17.1	3.4	22.8	612
06.06.2016 09:05:56	36.2	23.4	22.7	36.6	33.7	24.3	1368	12.8	0.7	22.7	618
06.06.2016 09:06:02	27.9	25.2	23.2	27.9	27.8	26.1	1374	2.7	2	23.2	624
06.06.2016 09:06:08	42.1	25.7	24.2	64	46.6	28.1	1380	16.4	1.5	24.2	630
06.06.2016 09:06:14	29.7	21.9	20.9	34.7	28.9	22.2	1386	7.8	1	20.9	636
06.06.2016 09:06:20	35.7	28.4	24.7	35.7	35.3	30.3	1392	7.3	3.7	24.7	642
06.06.2016 09:06:26	35	30.4	25.4	35	35	32.1	1398	4.6	5	25.4	648
06.06.2016 09:06:32	33.3	25.5	23.8	38.3	32.5	25.7	1404	7.8	1.7	23.8	654
06.06.2016 09:06:38	38.2	28.1	23.3	43.2	37.4	29.4	1410	10.1	4.8	23.3	660
06.06.2016 09:06:44	36	24	21.8	41	35	25.4	1416	12	2.2	21.8	666
06.06.2016 09:06:50	30.3	24.2	21.5	30.3	30.2	26.2	1422	6.1	2.7	21.5	672
06.06.2016 09:06:56	31.2	24.5	22.6	31.2	30.4	25.8	1428	6.7	1.9	22.6	678
06.06.2016 09:07:02	36.5	25.2	22.5	41.5	35.3	26	1434	11.3	2.7	22.5	684
06.06.2016 09:07:08	28.5	26.9	22.8	28.5	28.5	27.6	1440	1.6	4.1	22.8	690
06.06.2016 09:07:14	24	23.8	22.4	24	24	23.9	1446	0.2	1.4	22.4	696
06.06.2016 09:07:20	25.6	24.2	22.8	25.6	25.5	24.8	1452	1.4	1.4	22.8	702
06.06.2016 09:07:26	30.2	22.5	21.1	30.5	28.6	23.2	1458	7.7	1.4	21.1
06.06.2016 09:07:32	25.3	23.1	20.9	25.3	25.2	24.1	1464	2.2	2.2	20.9
06.06.2016 09:07:38	22.8	22.1	20.8	22.8	22.8	22.4	1470	0.7	1.3	20.8
06.06.2016 09:07:44	31.3	22.1	21.2	31.7	29.6	23.1	1476	9.2	0.9	21.2
06.06.2016 09:07:50	28.5	23.9	22	28.5	28.2	25	1482	4.6	1.9	22
06.06.2016 09:07:56	21.3	21.2	20.8	21.3	21.3	21.2	1488	0.1	0.4	20.8
06.06.2016 09:08:02	25	22.6	20.9	25	24.9	23.3	1494	2.4	1.7	20.9
06.06.2016 09:08:08	27.5	24.1	22.3	27.5	27.4	25.3	1500	3.4	1.8	22.3
06.06.2016 09:08:14	25.7	23	21.4	25.7	25.6	23.8	1506	2.7	1.6	21.4
06.06.2016 09:08:20	24.5	22.9	20.8	24.5	24.4	23.6	1512	1.6	2.1	20.8
06.06.2016 09:08:26	22.6	21.4	20.3	22.6	22.6	21.9	1518	1.2	1.1	20.3
06.06.2016 09:08:32	33.8	25.2	21.8	38.8	33	25.8	1524	8.6	3.4	21.8
06.06.2016 09:08:38	22.8	22.5	21.6	22.8	22.8	22.6	1530	0.3	0.9	21.6
06.06.2016 09:08:44	24.6	22.7	21.4	24.6	24.5	23.2	1536	1.9	1.3	21.4
06.06.2016 09:08:50	25.6	22.8	21.3	25.6	25.6	24	1542	2.8	1.5	21.3
06.06.2016 09:08:56	31.3	23	20.7	36.3	30.5	23.5	1548	8.3	2.3	20.7
06.06.2016 09:09:02	27.2	22.2	21.7	27.2	26.4	22.7	1554	5	0.5	21.7
06.06.2016 09:09:08	23.9	23.9	23.4	23.9	23.9	23.9	1560	0	0.5	23.4
06.06.2016 09:09:14	28.5	26	22	28.5	28.5	27.1	1566	2.5	4	22
06.06.2016 09:09:20	30.4	21.8	20.5	30.8	28.7	22.5	1572	8.6	1.3	20.5
06.06.2016 09:09:26	26.8	22.2	21.1	26.8	26.8	24	1578	4.6	1.1	21.1
06.06.2016 09:09:32	25.7	22.1	21.4	25.7	25.7	23.4	1584	3.6	0.7	21.4
06.06.2016 09:09:38	23.2	23.1	21.6	23.2	23.2	23.1	1590	0.1	1.5	21.6
06.06.2016 09:09:44	30.1	25	22.4	30.1	29.3	25.5	1596	5.1	2.6	22.4
06.06.2016 09:09:50	22.6	21.4	20.3	22.6	22.6	21.9	1602	1.2	1.1	20.3
06.06.2016 09:09:56	26.3	21.9	21.7	26.3	26.2	23.5	1608	4.4	0.2	21.7
06.06.2016 09:10:02	22.1	22.1	21.6	22.1	22.1	22.1	1614	0	0.5	21.6
06.06.2016 09:10:08	25.3	23.6	21.5	25.3	25.3	24.4	1620	1.7	2.1	21.5
06.06.2016 09:10:14	24	23.3	20.7	24	24	23.6	1626	0.7	2.6	20.7
06.06.2016 09:10:20	24.7	22.1	21.6	24.7	24.6	22.9	1632	2.6	0.5	21.6
06.06.2016 09:10:26	28.8	22.5	20.9	28.8	28	23.6	1638	6.3	1.6	20.9
06.06.2016 09:10:32	21.3	21.1	20.4	21.3	21.3	21.2	1644	0.2	0.7	20.4
06.06.2016 09:10:38	25.2	21.7	20.9	25.2	24.9	22.2	1650	3.5	0.8	20.9
06.06.2016 09:10:44	21.5	21.5	20.7	21.5	21.5	21.5	1656	0	0.8	20.7
06.06.2016 09:10:50	23.4	22.7	20.8	23.4	23.4	23	1662	0.7	1.9	20.8
06.06.2016 09:10:56	40.6	24.3	22.7	84.1	51.3	25.8	1668	16.3	1.6	22.7
06.06.2016 09:11:02	32.5	24	21	37.5	31.7	24.6	1674	8.5	3	21
06.06.2016 09:11:08	22.7	22.7	22.2	22.7	22.7	22.7	1680	0	0.5	22.2
06.06.2016 09:11:14	23.1	23	22	23.1	23.1	23.1	1686	0.1	1	22
06.06.2016 09:11:20	22.9	22.8	22.1	22.9	22.9	22.8	1692	0.1	0.7	22.1
06.06.2016 09:11:26	22.4	22.4	21.8	22.4	22.4	22.4	1698	0	0.6	21.8
06.06.2016 09:11:32	33.4	24.5	23.2	33.8	31.8	25.8	1704	8.9	1.3	23.2
06.06.2016 09:11:38	27.2	24.8	23.7	27.2	27.2	25.5	1710	2.4	1.1	23.7
06.06.2016 09:11:44	24.7	23.5	22.7	24.7	24.7	24.1	1716	1.2	0.8	22.7
06.06.2016 09:11:50	28.3	25.4	23.1	28.3	28.2	26.3	1722	2.9	2.3	23.1
06.06.2016 09:11:56	31.7	23.8	21.8	32	30	24.6	1728	7.9	2	21.8
06.06.2016 09:12:02	27.2	22.7	21.9	27.2	27.1	24.3	1734	4.5	0.8	21.9
06.06.2016 09:12:08	43.4	24.9	22	43.8	40.6	27.3	1740	18.5	2.9	22
06.06.2016 09:12:14	30.3	23	21.9	30.3	29.5	24.2	1746	7.3	1.1	21.9
06.06.2016 09:12:20	29	24.4	21.5	29	29	26.1	1752	4.6	2.9	21.5
06.06.2016 09:12:26	26.2	24.5	22.7	26.2	26.2	25.3	1758	1.7	1.8	22.7
06.06.2016 09:12:32	28.5	23	22.5	28.5	27.7	23.7	1764	5.5	0.5	22.5
06.06.2016 09:12:38	31.1	25.9	25	31.1	31	27.5	1770	5.2	0.9	25
06.06.2016 09:12:44	33.5	25.6	23	33.5	33.1	27.8	1776	7.9	2.6	23
06.06.2016 09:12:50	35.7	22.4	20.6	36	33.2	23.8	1782	13.3	1.8	20.6
06.06.2016 09:12:56	33.2	20.5	20.4	91.2	37.7	21.7	1788	12.7	0.1	20.4
06.06.2016 09:13:02	26.5	25	22.6	26.5	26.5	25.7	1794	1.5	2.4	22.6
06.06.2016 09:13:08	29.6	25.5	23.7	29.6	29.5	27	1800	4.1	1.8	23.7
06.06.2016 09:13:14	34.6	27	22.9	34.6	33.8	28.6	1806	7.6	4.1	22.9
06.06.2016 09:13:20	39.7	28.6	25.9	44.7	38.8	30	1812	11.1	2.7	25.9
06.06.2016 09:13:26	29.3	25.2	22.1	50.9	35.8	26.2	1818	4.1	3.1	22.1
06.06.2016 09:13:32	36.5	27.1	23.1	94.1	43.2	30.6	1824	9.4	4	23.1
06.06.2016 09:13:38	26.6	23.7	22	26.6	26.5	24.6	1830	2.9	1.7	22
06.06.2016 09:13:44	30.4	25.4	23.4	30.4	30.2	26.9	1836	5	2	23.4
06.06.2016 09:13:50	35.1	25.4	24.6	73	41.1	26.7	1842	9.7	0.8	24.6
06.06.2016 09:13:56	32.8	29.8	25.5	32.8	32.8	31.2	1848	3	4.3	25.5
06.06.2016 09:14:02	31.7	26.8	23.2	31.7	31.6	28.6	1854	4.9	3.6	23.2
06.06.2016 09:14:08	29.3	26.2	23.7	29.3	29.3	27.6	1860	3.1	2.5	23.7
06.06.2016 09:14:14	30.3	26.1	23.7	30.3	30.3	28	1866	4.2	2.4	23.7
06.06.2016 09:14:20	29.7	26.3	21.7	29.7	29.6	27.5	1872	3.4	4.6	21.7
06.06.2016 09:14:26	36.5	25	22.4	36.5	34.9	26.7	1878	11.5	2.6	22.4
06.06.2016 09:14:32	25.7	24.1	22.8	25.7	25.7	24.8	1884	1.6	1.3	22.8
06.06.2016 09:14:38	37.3	23.7	22	37.7	34.8	24.9	1890	13.6	1.7	22
06.06.2016 09:14:44	41.8	25.7	22.5	42.2	39.1	27.4	1896	16.1	3.2	22.5
06.06.2016 09:14:50	31.6	26.1	24	31.6	31.2	27.5	1902	5.5	2.1	24
06.06.2016 09:14:56	27.5	26	22.4	27.5	27.5	26.7	1908	1.5	3.6	22.4
06.06.2016 09:15:02	34.6	24.8	22.8	34.6	33.4	26.4	1914	9.8	2	22.8
06.06.2016 09:15:08	40.9	24.7	22	45.9	39.6	27.3	1920	16.2	2.7	22
06.06.2016 09:15:14	41.2	26.3	22.9	41.2	39.7	28.8	1926	14.9	3.4	22.9
06.06.2016 09:15:20	32.3	25	21.8	90.2	37.5	25.5	1932	7.3	3.2	21.8
06.06.2016 09:15:26	26.9	25.1	22.7	64.5	34.6	25.9	1938	1.8	2.4	22.7
06.06.2016 09:15:32	37.6	22.6	21	38.3	34.3	23.7	1944	15	1.6	21
06.06.2016 09:15:38	31.2	23.5	22.3	31.2	30.8	25.2	1950	7.7	1.2	22.3
06.06.2016 09:15:44	27.3	24.4	22.3	64.8	34.9	25.3	1956	2.9	2.1	22.3
06.06.2016 09:15:50	27.3	24.8	22	27.3	27.2	25.9	1962	2.5	2.8	22
06.06.2016 09:15:56	24	22.9	21.5	61.5	31.7	23.4	1968	1.1	1.4	21.5
06.06.2016 09:16:02	33.3	27.1	23.1	33.3	32.5	28.1	1974	6.2	4	23.1
06.06.2016 09:16:08	30.7	24.5	23	30.7	30.5	26.2	1980	6.2	1.5	23
06.06.2016 09:16:14	27.8	26.1	23.5	65.3	35.5	26.9	1986	1.7	2.6	23.5
06.06.2016 09:16:20	29.6	26.3	23.2	67.1	37.3	27.8	1992	3.3	3.1	23.2
06.06.2016 09:16:26	22.4	22.4	22.2	22.4	22.4	22.4	1998	0	0.2	22.2
06.06.2016 09:16:32	36.4	24.9	22.6	36.4	36	27.8	2004	11.5	2.3	22.6
06.06.2016 09:16:38	31.2	25	22.6	31.2	30.9	26.7	2010	6.2	2.4	22.6
06.06.2016 09:16:44	28.5	22.7	22.1	28.5	28.1	24.3	2016	5.8	0.6	22.1
06.06.2016 09:16:50	23.9	23.9	22.7	23.9	23.9	23.8	2022	0	1.2	22.7
06.06.2016 09:16:56	28	22.8	21	28	27.7	24.1	2028	5.2	1.8	21
06.06.2016 09:17:02	28.5	26.6	20.6	28.5	28.5	27.4	2034	1.9	6	20.6
06.06.2016 09:17:08	30.9	22.1	20.3	35.9	30.1	22.8	2040	8.8	1.8	20.3
06.06.2016 09:17:14	27.1	24.5	21.1	27.1	27	25.6	2046	2.6	3.4	21.1
06.06.2016 09:17:20	29.5	21.7	21.1	29.8	27.9	22.4	2052	7.8	0.6	21.1
06.06.2016 09:17:26	21.8	21.8	21.4	21.8	21.8	21.8	2058	0	0.4	21.4
06.06.2016 09:17:32	31.4	24.1	21.6	69	38.3	25.3	2064	7.3	2.5	21.6
06.06.2016 09:17:38	27.1	22.6	20	27.1	27	24.3	2070	4.5	2.6	20

## Sheet: 12OS
date & time	PM10 [ug/m3]	PM2,5 [ug/m3]	PM1 [ug/m3]	Inhalable [ug/m3]	Thoracic [ug/m3]	Alveolic [ug/m3]	Zeit in sek	2.5 bis 10	1 bis 2.5	kleiner 1		Sägedauer	36				Temperature [°C]	Humidity [%rH]
06.06.2016 11:35:55	37.8	31.1	30.5	38.2	36.2	31.3	6	6.7	0.6	30.5							24.67	48.11
06.06.2016 11:36:01	31.3	31.2	30.2	31.3	31.3	31.2	12	0.1	1	30.2							24.67	48.21
06.06.2016 11:36:07	35.2	31.6	29.9	35.2	35.1	32.5	18	3.6	1.7	29.9							24.48	48.63
06.06.2016 11:36:13	34.3	34.2	33.4	34.3	34.3	34.2	24	0.1	0.8	33.4							24.29	48.95
06.06.2016 11:36:19	37.4	36.1	34.6	37.4	37.4	36.7	30	1.3	1.5	34.6							24.09	49.05
06.06.2016 11:36:25	33	32.9	31.4	33	33	33	36	0.1	1.5	31.4							24	48.95
06.06.2016 11:36:31	49.3	33.3	31	49.7	47.3	36.3	42	16	2.3	31							23.9	49.15
06.06.2016 11:36:37	33	28.7	27	33	32.7	29.6	48	4.3	1.7	27							23.81	49.26
06.06.2016 11:36:43	42.5	30.5	29.6	69.1	48.2	31.8	54	12	0.9	29.6							23.71	49.57
06.06.2016 11:36:49	30	30	29.9	30	30	30	60	0	0.1	29.9							23.71	49.57
06.06.2016 11:36:55	26.2	26.1	25.2	26.2	26.2	26.2	66	0.1	0.9	25.2							23.61	49.78
06.06.2016 11:37:01	28.7	26.8	25.8	28.7	28.6	27.3	72	1.9	1	25.8							23.52	49.68
06.06.2016 11:37:07	31.4	31.3	30.9	31.4	31.4	31.3	78	0.1	0.4	30.9							23.52	49.68
06.06.2016 11:37:13	29.8	29.8	29.7	29.8	29.8	29.8	84	0	0.1	29.7							23.52	49.78
06.06.2016 11:37:19	47.6	32.1	31.3	47.9	45.6	34.5	90	15.5	0.8	31.3							23.42	49.89
06.06.2016 11:37:25	47.9	29.1	28.4	74.8	51.9	30.3	96	18.8	0.7	28.4							23.42	49.89
06.06.2016 11:37:31	29.1	29.1	29.1	29.1	29.1	29.1	102	0	0	29.1							23.42	49.47
06.06.2016 11:37:37	27.9	27.9	27.8	27.9	27.9	27.9	108	0	0.1	27.8							23.33	50.09
06.06.2016 11:37:43	38.3	31.5	28.9	38.3	37.7	32.5	114	6.8	2.6	28.9							23.33	50.72
06.06.2016 11:37:49	39.5	30.8	29.5	44.4	38.6	31.4	120	8.7	1.3	29.5							23.33	50.62
06.06.2016 11:37:55	30.1	30	28.9	30.1	30.1	30	126	0.1	1.1	28.9							23.33	50.3
06.06.2016 11:38:01	28.7	28.7	28.5	28.7	28.7	28.7	132	0	0.2	28.5							23.33	50.09
06.06.2016 11:38:07	37.2	27.1	25.6	42.1	36.3	28	138	10.1	1.5	25.6							23.33	49.68
06.06.2016 11:38:13	39.2	25.5	25.1	44.2	37.5	26.3	144	13.7	0.4	25.1							23.33	50.09
06.06.2016 11:38:19	37.1	27.9	25.3	42.1	36.3	28.8	150	9.2	2.6	25.3							23.33	50.3
06.06.2016 11:38:25	28	26.7	25.9	28	28	27.3	156	1.3	0.8	25.9							23.33	50.2
06.06.2016 11:38:31	29.6	29.6	29	29.6	29.6	29.6	162	0	0.6	29							23.42	49.68
06.06.2016 11:38:37	26.1	25.8	24.7	26.1	26.1	25.9	168	0.3	1.1	24.7							23.42	49.47
06.06.2016 11:38:43	26.3	26	25.5	63.8	34	26.2	174	0.3	0.5	25.5							23.42	49.36
06.06.2016 11:38:49	28.6	28.6	28.3	28.6	28.6	28.6	180	0	0.3	28.3							23.42	49.15
06.06.2016 11:38:55	28.3	28.3	27.9	28.3	28.3	28.3	186	0	0.4	27.9							23.42	48.95
06.06.2016 11:39:01	27.5	27.4	26.8	27.5	27.5	27.4	192	0.1	0.6	26.8							23.42	49.05
06.06.2016 11:39:07	27.7	27.7	27.7	27.7	27.7	27.7	198	0	0	27.7							23.42	48.74
06.06.2016 11:39:13	28.5	27.8	27.1	28.5	28.5	28.1	204	0.7	0.7	27.1							23.42	48.74
06.06.2016 11:39:19	29.9	29.9	29.1	29.9	29.9	29.9	210	0	0.8	29.1							23.42	49.05
06.06.2016 11:39:25	29.2	28.9	27.7	29.2	29.2	29	216	0.3	1.2	27.7							23.42	49.47
06.06.2016 11:39:31	29.5	28.9	27.4	29.5	29.5	29.2	222	0.6	1.5	27.4							23.42	49.47
06.06.2016 11:39:37	27.3	27.3	27.1	27.3	27.3	27.3	228	0	0.2	27.1							23.42	49.26
06.06.2016 11:39:43	36.2	27.5	25.9	41.2	35.4	28.2	234	8.7	1.6	25.9							23.42	49.68
06.06.2016 11:39:49	27.9	27.9	27.7	27.9	27.9	27.9	240	0	0.2	27.7							23.42	49.57
06.06.2016 11:39:55	35.3	29.7	28.8	35.3	34.5	30.5	246	5.6	0.9	28.8							23.42	49.78
06.06.2016 11:40:01	27.4	27.1	25.9	27.4	27.4	27.2	252	0.3	1.2	25.9							23.42	50.09
06.06.2016 11:40:07	27.3	27.3	26.7	27.3	27.3	27.3	258	0	0.6	26.7							23.42	50.51
06.06.2016 11:40:13	25.2	25.2	25.2	25.2	25.2	25.2	264	0	0	25.2							23.33	51.24
06.06.2016 11:40:19	27.4	27.4	27.4	27.4	27.4	27.4	270	0	0	27.4							23.33	51.35
06.06.2016 11:40:25	25.3	25.3	25.3	25.3	25.3	25.3	276	0	0	25.3							23.33	50.83
06.06.2016 11:40:31	27.2	26.3	25.6	27.2	27.2	26.7	282	0.9	0.7	25.6							23.33	50.09
06.06.2016 11:40:37	37.8	27.8	26.9	42.8	36.9	28.7	288	10	0.9	26.9							23.33	49.36
06.06.2016 11:40:43	25.4	25.4	24.9	25.4	25.4	25.4	294	0	0.5	24.9							23.33	49.47
06.06.2016 11:40:49	28	27.6	26	28	28	27.8	300	0.4	1.6	26							23.33	49.47
06.06.2016 11:40:55	26.6	26.6	26.6	26.6	26.6	26.6	306	0	0	26.6							23.33	48.84
06.06.2016 11:41:01	30.1	27.5	26.6	129.7	35.2	28.3	312	2.6	0.9	26.6							23.23	48.53
06.06.2016 11:41:07	29	28.9	27.9	29	29	29	318	0.1	1	27.9							23.23	49.05
06.06.2016 11:41:13	25.7	25.7	25.7	25.7	25.7	25.7	324	0	0	25.7							23.23	48.74
06.06.2016 11:41:19	28.3	27	26.4	49.9	34.9	27.1	330	1.3	0.6	26.4							23.23	48.01
06.06.2016 11:41:25	38.5	27.7	27.1	60.4	43.1	28.3	336	10.8	0.6	27.1							23.23	48.01
06.06.2016 11:41:31	25.9	25.9	25.9	25.9	25.9	25.9	342	0	0	25.9							23.14	48.01
06.06.2016 11:41:37	28.3	27.3	26.8	28.3	28.3	27.7	348	1	0.5	26.8							23.14	47.9
06.06.2016 11:41:43	26.1	26.1	25.6	26.1	26.1	26.1	354	0	0.5	25.6							23.14	47.8
06.06.2016 11:41:49	29.4	28.7	26.5	29.4	29.4	29	360	0.7	2.2	26.5							23.14	47.8
06.06.2016 11:41:55	25.6	25.3	24.6	25.6	25.6	25.4	366	0.3	0.7	24.6							23.04	48.32
06.06.2016 11:42:01	26.1	26	25.6	26.1	26.1	26	372	0.1	0.4	25.6							23.04	48.21
06.06.2016 11:42:07	28.2	27	24.9	28.2	28.1	27.5	378	1.2	2.1	24.9							23.04	48.11
06.06.2016 11:42:13	29.3	29	27.8	29.3	29.3	29.1	384	0.3	1.2	27.8							23.04	48.53
06.06.2016 11:42:19	30.2	29.6	27.9	30.2	30.2	29.8	390	0.6	1.7	27.9							23.04	48.32
06.06.2016 11:42:25	25.5	25.4	25	25.5	25.5	25.4	396	0.1	0.4	25
06.06.2016 11:42:31	25.5	25.5	25.4	25.5	25.5	25.5	402	0	0.1	25.4
06.06.2016 11:42:37	26.2	25.9	24.8	26.2	26.2	26	408	0.3	1.1	24.8
06.06.2016 11:42:43	26.1	26.1	25.7	26.1	26.1	26.1	414	0	0.4	25.7
06.06.2016 11:42:49	25.4	25.4	25.4	25.4	25.4	25.4	420	0	0	25.4
06.06.2016 11:42:55	28.8	27.9	25.8	28.8	28.8	28.3	426	0.9	2.1	25.8
06.06.2016 11:43:01	25.1	25.1	25	25.1	25.1	25.1	432	0	0.1	25
06.06.2016 11:43:07	28.1	28.1	28.1	28.1	28.1	28.1	438	0	0	28.1
06.06.2016 11:43:13	25.5	25.5	25.3	25.5	25.5	25.5	444	0	0.2	25.3
06.06.2016 11:43:19	27.2	27.2	27.1	27.2	27.2	27.2	450	0	0.1	27.1
06.06.2016 11:43:25	26.2	26.2	25.7	26.2	26.2	26.2	456	0	0.5	25.7
06.06.2016 11:43:31	26.1	26.1	26.1	26.1	26.1	26.1	462	0	0	26.1
06.06.2016 11:43:37	24.7	24.7	24.6	24.7	24.7	24.7	468	0	0.1	24.6
06.06.2016 11:43:43	26	26	25.8	26	26	26	474	0	0.2	25.8
06.06.2016 11:43:49	31.4	29.8	27	89	38.3	30.5	480	1.6	2.8	27
06.06.2016 11:43:55	27.3	26.1	24.9	27.3	27.3	26.7	486	1.2	1.2	24.9
06.06.2016 11:44:01	27.7	27.7	27.5	27.7	27.7	27.7	492	0	0.2	27.5
06.06.2016 11:44:07	24.9	24.6	24	24.9	24.9	24.7	498	0.3	0.6	24
06.06.2016 11:44:13	25.4	25.4	25.4	25.4	25.4	25.4	504	0	0	25.4
06.06.2016 11:44:19	26	26	26	26	26	26	510	0	0	26
06.06.2016 11:44:25	26.7	24.8	24.2	26.7	26.6	25.3	516	1.9	0.6	24.2
06.06.2016 11:44:31	25.6	25.6	25.6	25.6	25.6	25.6	522	0	0	25.6
06.06.2016 11:44:37	25.6	25.6	25.4	25.6	25.6	25.6	528	0	0.2	25.4
06.06.2016 11:44:43	28.2	28.1	27.3	28.2	28.2	28.2	534	0.1	0.8	27.3
06.06.2016 11:44:49	26.3	26.1	25.3	26.3	26.3	26.2	540	0.2	0.8	25.3
06.06.2016 11:44:55	26.1	25.7	24.3	26.1	26.1	25.9	546	0.4	1.4	24.3
06.06.2016 11:45:01	32.5	29.3	28.2	32.5	32.2	29.7	552	3.2	1.1	28.2
06.06.2016 11:45:07	24.1	24.1	24.1	24.1	24.1	24.1	558	0	0	24.1
06.06.2016 11:45:13	27.9	27.7	26.8	27.9	27.9	27.8	564	0.2	0.9	26.8
06.06.2016 11:45:19	27.7	27.5	26.8	27.7	27.7	27.6	570	0.2	0.7	26.8
06.06.2016 11:45:25	37.9	27.8	25.3	42.9	37	28.7	576	10.1	2.5	25.3
06.06.2016 11:45:31	41.3	28.7	27.4	46.3	39.7	29.4	582	12.6	1.3	27.4
06.06.2016 11:45:37	26.7	26.7	26.7	26.7	26.7	26.7	588	0	0	26.7
06.06.2016 11:45:43	27.1	27.1	27.1	27.1	27.1	27.1	594	0	0	27.1
06.06.2016 11:45:49	26.7	26.7	26.7	26.7	26.7	26.7	600	0	0	26.7
06.06.2016 11:45:55	25.3	25.3	25.3	25.3	25.3	25.3	606	0	0	25.3
06.06.2016 11:46:01	24.7	24.7	24.7	24.7	24.7	24.7	612	0	0	24.7
06.06.2016 11:46:07	27.2	26.8	25.8	27.2	27.2	27	618	0.4	1	25.8
06.06.2016 11:46:13	24.4	24.4	24.4	24.4	24.4	24.4	624	0	0	24.4
06.06.2016 11:46:19	24.9	24.9	24.9	24.9	24.9	24.9	630	0	0	24.9
06.06.2016 11:46:25	24.8	24.8	24.2	24.8	24.8	24.8	636	0	0.6	24.2
06.06.2016 11:46:31	25	25	24.8	25	25	25	642	0	0.2	24.8
06.06.2016 11:46:37	26.2	26.1	25.6	26.2	26.2	26.1	648	0.1	0.5	25.6
06.06.2016 11:46:43	28.3	27.3	26.7	28.3	28.3	27.7	654	1	0.6	26.7
06.06.2016 11:46:49	25.1	25	24.5	25.1	25.1	25	660	0.1	0.5	24.5
06.06.2016 11:46:55	27.7	27.7	26.8	27.7	27.7	27.6	666	0	0.9	26.8
06.06.2016 11:47:01	25.4	25	23.5	25.4	25.4	25.2	672	0.4	1.5	23.5
06.06.2016 11:47:07	26.2	26.2	26.2	26.2	26.2	26.2	678	0	0	26.2
06.06.2016 11:47:13	30	29.5	28.8	30	30	29.7	684	0.5	0.7	28.8
06.06.2016 11:47:19	29.1	27.3	26.5	29.1	29	27.7	690	1.8	0.8	26.5
06.06.2016 11:47:25	24.1	24.1	24.1	24.1	24.1	24.1	696	0	0	24.1
06.06.2016 11:47:31	31	26.1	24.9	31	30.2	26.6	702	4.9	1.2	24.9
06.06.2016 11:47:37	25.1	24.8	24	25.1	25.1	24.9	708	0.3	0.8	24
06.06.2016 11:47:43	23.9	23.9	23.9	23.9	23.9	23.9	714	0	0	23.9
06.06.2016 11:47:49	25.6	25.6	25.6	25.6	25.6	25.6	720	0	0	25.6
06.06.2016 11:47:55	27.5	27.2	26.5	27.5	27.5	27.3	726	0.3	0.7	26.5
06.06.2016 11:48:01	27.3	27.1	25.9	27.3	27.3	27.2	732	0.2	1.2	25.9
06.06.2016 11:48:07	26.2	26.2	26	26.2	26.2	26.2	738	0	0.2	26
06.06.2016 11:48:13	26.9	26.6	25.4	26.9	26.9	26.7	744	0.3	1.2	25.4
06.06.2016 11:48:19	29.5	28.5	27.4	29.5	29.5	28.9	750	1	1.1	27.4
06.06.2016 11:48:25	24.4	24.4	24.4	24.4	24.4	24.4	756	0	0	24.4
06.06.2016 11:48:31	25.5	25.5	25.2	25.5	25.5	25.5	762	0	0.3	25.2
06.06.2016 11:48:37	31.1	27.8	26.6	68.6	38.5	28.3	768	3.3	1.2	26.6
06.06.2016 11:48:43	29	28.8	27.9	29	29	28.9	774	0.2	0.9	27.9
06.06.2016 11:48:49	26.9	26.9	26.8	26.9	26.9	26.9	780	0	0.1	26.8
06.06.2016 11:48:55	25.3	25.3	25.3	25.3	25.3	25.3	786	0	0	25.3
06.06.2016 11:49:01	24.6	24.6	24.3	24.6	24.6	24.6	792	0	0.3	24.3
06.06.2016 11:49:07	25.4	24.9	23.5	25.4	25.4	25.1	798	0.5	1.4	23.5
06.06.2016 11:49:13	24.7	24.7	24.7	24.7	24.7	24.7	804	0	0	24.7
06.06.2016 11:49:19	37.9	28.4	26.7	38.3	36.2	29.5	810	9.5	1.7	26.7
06.06.2016 11:49:25	26.9	26.8	26.4	26.9	26.9	26.9	816	0.1	0.4	26.4
06.06.2016 11:49:31	33.1	31.1	27.2	33.1	33	31.9	822	2	3.9	27.2
06.06.2016 11:49:37	27.4	27.4	27	27.4	27.4	27.4	828	0	0.4	27
06.06.2016 11:49:43	24.7	24.7	24.2	24.7	24.7	24.7	834	0	0.5	24.2
06.06.2016 11:49:49	28.1	27.1	26.2	28.1	28.1	27.5	840	1	0.9	26.2
06.06.2016 11:49:55	40.9	29.7	27.7	45.9	40	31.5	846	11.2	2	27.7
06.06.2016 11:50:01	29.7	26.1	25.8	29.7	29.6	27.4	852	3.6	0.3	25.8
06.06.2016 11:50:07	34.2	26.9	24.9	34.5	32.5	27.4	858	7.3	2	24.9
06.06.2016 11:50:13	35.7	25.1	24.6	40.7	34.5	25.6	864	10.6	0.5	24.6
06.06.2016 11:50:19	23.9	23.9	23.9	23.9	23.9	23.9	870	0	0	23.9
06.06.2016 11:50:25	25.6	25.4	24.7	25.6	25.6	25.5	876	0.2	0.7	24.7
06.06.2016 11:50:31	28.7	28.6	28.1	28.7	28.7	28.6	882	0.1	0.5	28.1
06.06.2016 11:50:37	28	25.8	25.3	28	27.9	26.4	888	2.2	0.5	25.3
06.06.2016 11:50:43	28.2	27.8	26.9	28.2	28.2	28	894	0.4	0.9	26.9
06.06.2016 11:50:49	27.6	27.5	26.2	27.6	27.6	27.5	900	0.1	1.3	26.2
06.06.2016 11:50:55	28.8	28.1	25.9	28.8	28.8	28.4	906	0.7	2.2	25.9
06.06.2016 11:51:01	29.8	24.7	23.5	29.8	29.4	25.6	912	5.1	1.2	23.5
06.06.2016 11:51:07	24.8	24.6	23.9	24.8	24.8	24.7	918	0.2	0.7	23.9
06.06.2016 11:51:13	43.3	25.9	24.5	43.7	40	27.1	924	17.4	1.4	24.5
06.06.2016 11:51:19	27.6	26.6	25.9	27.6	27.6	27.1	930	1	0.7	25.9
06.06.2016 11:51:25	29	26.8	26.2	29	28.9	27.4	936	2.2	0.6	26.2
06.06.2016 11:51:31	25.1	25.1	25	25.1	25.1	25.1	942	0	0.1	25
06.06.2016 11:51:37	26.9	26.4	25.1	26.9	26.9	26.6	948	0.5	1.3	25.1
06.06.2016 11:51:43	24.7	24.7	24.4	24.7	24.7	24.7	954	0	0.3	24.4
06.06.2016 11:51:49	25.6	25.6	25.5	25.6	25.6	25.6	960	0	0.1	25.5
06.06.2016 11:51:55	28.7	25.5	24.7	28.7	28.6	26.5	966	3.2	0.8	24.7
06.06.2016 11:52:01	29.2	29.2	29.1	29.2	29.2	29.2	972	0	0.1	29.1
06.06.2016 11:52:07	26.5	26.5	26.4	26.5	26.5	26.5	978	0	0.1	26.4
06.06.2016 11:52:13	26.3	26.3	26.3	26.3	26.3	26.3	984	0	0	26.3
06.06.2016 11:52:19	31.1	30.5	29	130.7	36.3	30.8	990	0.6	1.5	29
06.06.2016 11:52:25	32.1	27.8	26.2	69.6	39.4	28.7	996	4.3	1.6	26.2
06.06.2016 11:52:31	28	28	28	28	28	28	1002	0	0	28
06.06.2016 11:52:37	28.4	28.4	28.1	28.4	28.4	28.4	1008	0	0.3	28.1
06.06.2016 11:52:43	26.4	26.4	26.4	26.4	26.4	26.4	1014	0	0	26.4
06.06.2016 11:52:49	24.2	24.2	24.1	24.2	24.2	24.2	1020	0	0.1	24.1
06.06.2016 11:52:55	29.7	29.3	28.3	29.7	29.7	29.5	1026	0.4	1	28.3
06.06.2016 11:53:01	25.8	25.8	25.7	25.8	25.8	25.8	1032	0	0.1	25.7
06.06.2016 11:53:07	28.8	27.1	24.7	28.8	28.8	27.8	1038	1.7	2.4	24.7
06.06.2016 11:53:13	30.1	28.2	27.6	30.1	30	28.7	1044	1.9	0.6	27.6
06.06.2016 11:53:19	29.7	27.6	25.9	29.7	29.7	28.5	1050	2.1	1.7	25.9
06.06.2016 11:53:25	24.3	24.3	24.2	24.3	24.3	24.3	1056	0	0.1	24.2
06.06.2016 11:53:31	29.6	28.5	27	29.6	29.6	29	1062	1.1	1.5	27
06.06.2016 11:53:37	26.6	26.6	25.9	26.6	26.6	26.6	1068	0	0.7	25.9
06.06.2016 11:53:43	27.8	27.4	26.6	27.8	27.8	27.6	1074	0.4	0.8	26.6
06.06.2016 11:53:49	27.1	27	26.3	27.1	27.1	27.1	1080	0.1	0.7	26.3
06.06.2016 11:53:55	31.5	31.3	30.6	31.5	31.5	31.4	1086	0.2	0.7	30.6
06.06.2016 11:54:01	28.4	27.4	26.7	65.9	36.1	27.9	1092	1	0.7	26.7
06.06.2016 11:54:07	27.6	27.6	27.2	27.6	27.6	27.5	1098	0	0.4	27.2
06.06.2016 11:54:13	26.2	26.2	26.1	26.2	26.2	26.2	1104	0	0.1	26.1
06.06.2016 11:54:19	26.8	26.7	26.3	26.8	26.8	26.8	1110	0.1	0.4	26.3
06.06.2016 11:54:25	24.9	24.9	24.8	24.9	24.9	24.9	1116	0	0.1	24.8
06.06.2016 11:54:31	26.5	26.5	26.5	26.5	26.5	26.5	1122	0	0	26.5
06.06.2016 11:54:37	26.3	26	25.3	26.3	26.3	26.1	1128	0.3	0.7	25.3
06.06.2016 11:54:43	26.4	26.4	26.4	26.4	26.4	26.4	1134	0	0	26.4
06.06.2016 11:54:49	28.3	28.3	28.3	28.3	28.3	28.3	1140	0	0	28.3
06.06.2016 11:54:55	29.4	28.5	26.9	29.4	29.4	28.9	1146	0.9	1.6	26.9
06.06.2016 11:55:01	27.1	27.1	27	27.1	27.1	27.1	1152	0	0.1	27
06.06.2016 11:55:07	26.7	26.7	26.4	26.7	26.7	26.7	1158	0	0.3	26.4
06.06.2016 11:55:13	31.3	29	28.1	31.3	31.2	30	1164	2.3	0.9	28.1
06.06.2016 11:55:19	28	28	28	28	28	28	1170	0	0	28
06.06.2016 11:55:25	31.5	27.8	26.6	31.5	31.3	28.7	1176	3.7	1.2	26.6
06.06.2016 11:55:31	26.1	26.1	25.9	26.1	26.1	26.1	1182	0	0.2	25.9
06.06.2016 11:55:37	30.4	28.5	28.1	30.4	30.4	29.4	1188	1.9	0.4	28.1
06.06.2016 11:55:43	32.7	29.3	27.8	32.7	32.4	29.8	1194	3.4	1.5	27.8
06.06.2016 11:55:49	28.3	28.1	27.4	28.3	28.3	28.2	1200	0.2	0.7	27.4
06.06.2016 11:55:55	26.2	26.2	25.6	26.2	26.2	26.2	1206	0	0.6	25.6
06.06.2016 11:56:01	24.4	24.4	24.4	24.4	24.4	24.4	1212	0	0	24.4
06.06.2016 11:56:07	26.1	26.1	25.6	26.1	26.1	26.1	1218	0	0.5	25.6
06.06.2016 11:56:13	25.6	25.6	25.4	25.6	25.6	25.6	1224	0	0.2	25.4
06.06.2016 11:56:19	28.6	27.5	26.5	28.6	28.6	28	1230	1.1	1	26.5
06.06.2016 11:56:25	26	26	25.9	26	26	26	1236	0	0.1	25.9
06.06.2016 11:56:31	26.7	26.7	26.7	26.7	26.7	26.7	1242	0	0	26.7
06.06.2016 11:56:37	28	27.3	25.1	28	28	27.6	1248	0.7	2.2	25.1
06.06.2016 11:56:43	28.4	27.5	25.3	28.4	28.4	27.9	1254	0.9	2.2	25.3
06.06.2016 11:56:49	26.7	26.3	25.6	26.7	26.7	26.5	1260	0.4	0.7	25.6
06.06.2016 11:56:55	27.3	27.1	26.4	27.3	27.3	27.2	1266	0.2	0.7	26.4
06.06.2016 11:57:01	31.5	27.5	26.5	31.5	31.1	28.2	1272	4	1	26.5
06.06.2016 11:57:07	24.6	24.6	24.3	24.6	24.6	24.6	1278	0	0.3	24.3
06.06.2016 11:57:13	25.7	25.7	25.7	25.7	25.7	25.7	1284	0	0	25.7
06.06.2016 11:57:19	25.4	25.4	25.4	25.4	25.4	25.4	1290	0	0	25.4
06.06.2016 11:57:25	27.4	26.7	24.9	27.4	27.4	27.1	1296	0.7	1.8	24.9
06.06.2016 11:57:31	28	27.5	25.9	28	28	27.7	1302	0.5	1.6	25.9
06.06.2016 11:57:37	41	26.3	24.9	46.3	38.5	26.9	1308	14.7	1.4	24.9
06.06.2016 11:57:43	30.1	28.5	27.6	30.1	30.1	29.2	1314	1.6	0.9	27.6
06.06.2016 11:57:49	29.6	28.4	26.8	29.6	29.6	28.9	1320	1.2	1.6	26.8
06.06.2016 11:57:55	27	27	26.7	27	27	27	1326	0	0.3	26.7
06.06.2016 11:58:01	28.2	27.1	25.7	28.2	28.2	27.6	1332	1.1	1.4	25.7
06.06.2016 11:58:07	25.7	25.7	25.3	25.7	25.7	25.7	1338	0	0.4	25.3
06.06.2016 11:58:13	27.6	27.6	27.5	27.6	27.6	27.6	1344	0	0.1	27.5
06.06.2016 11:58:19	29.3	28.3	25.8	29.3	29.3	28.7	1350	1	2.5	25.8
06.06.2016 11:58:25	32.4	28.2	25.7	32.4	32.2	29.3	1356	4.2	2.5	25.7
06.06.2016 11:58:31	25.8	25.7	25.3	25.8	25.8	25.7	1362	0.1	0.4	25.3
06.06.2016 11:58:37	26.2	26	25.3	26.2	26.2	26.1	1368	0.2	0.7	25.3
06.06.2016 11:58:43	24.1	24.1	24.1	24.1	24.1	24.1	1374	0	0	24.1
06.06.2016 11:58:49	27.4	26.4	25.8	27.4	27.4	26.8	1380	1	0.6	25.8
06.06.2016 11:58:55	26.3	26.3	26.3	26.3	26.3	26.3	1386	0	0	26.3
06.06.2016 11:59:01	23.8	23.8	23.7	23.8	23.8	23.8	1392	0	0.1	23.7
06.06.2016 11:59:07	25.4	25.3	24.8	25.4	25.4	25.3	1398	0.1	0.5	24.8
06.06.2016 11:59:13	27	27	27	27	27	27	1404	0	0	27
06.06.2016 11:59:19	27.4	26.2	24.9	27.4	27.4	26.7	1410	1.2	1.3	24.9
06.06.2016 11:59:25	26.4	26.4	26	26.4	26.4	26.3	1416	0	0.4	26
06.06.2016 11:59:31	25	25	24.5	25	25	25	1422	0	0.5	24.5
06.06.2016 11:59:37	25.7	23.8	23.2	25.7	25.6	24.3	1428	1.9	0.6	23.2
06.06.2016 11:59:43	26.1	25.9	24.9	26.1	26.1	26	1434	0.2	1	24.9
06.06.2016 11:59:49	24.4	24.4	23.9	24.4	24.4	24.4	1440	0	0.5	23.9
06.06.2016 11:59:55	26.8	26.8	26.3	26.8	26.8	26.8	1446	0	0.5	26.3
06.06.2016 12:00:01	24.5	24.5	24.5	24.5	24.5	24.5	1452	0	0	24.5
06.06.2016 12:00:07	25.5	25.5	24.8	25.5	25.5	25.5	1458	0	0.7	24.8
06.06.2016 12:00:13	24.7	24.7	24.6	24.7	24.7	24.7	1464	0	0.1	24.6
06.06.2016 12:00:19	25.1	25.1	25.1	25.1	25.1	25.1	1470	0	0	25.1
06.06.2016 12:00:25	24.7	24.7	24.7	24.7	24.7	24.7	1476	0	0	24.7
06.06.2016 12:00:31	25.7	25.2	23.6	25.7	25.7	25.4	1482	0.5	1.6	23.6
06.06.2016 12:00:37	25.3	25.2	24.8	25.3	25.3	25.2	1488	0.1	0.4	24.8
06.06.2016 12:00:43	24.9	24.9	24.8	24.9	24.9	24.9	1494	0	0.1	24.8
06.06.2016 12:00:49	34.1	24.6	24.1	39.1	33.2	25.3	1500	9.5	0.5	24.1
06.06.2016 12:00:55	27.2	27.1	26.1	27.2	27.2	27.1	1506	0.1	1	26.1
06.06.2016 12:01:01	23.8	23.8	23.3	23.8	23.8	23.8	1512	0	0.5	23.3
06.06.2016 12:01:07	28	27.7	26.4	28	27.9	27.8	1518	0.3	1.3	26.4
06.06.2016 12:01:13	25.6	25.6	25.1	25.6	25.6	25.6	1524	0	0.5	25.1
06.06.2016 12:01:19	30.6	28.1	25.5	30.6	30.5	28.9	1530	2.5	2.6	25.5
06.06.2016 12:01:25	24.7	24.7	24.2	24.7	24.7	24.7	1536	0	0.5	24.2
06.06.2016 12:01:31	24.1	24	23.3	24.1	24.1	24.1	1542	0.1	0.7	23.3
06.06.2016 12:01:37	23.8	23.8	23.8	23.8	23.8	23.8	1548	0	0	23.8
06.06.2016 12:01:43	35.9	27.9	25.5	40.9	35.1	28.2	1554	8	2.4	25.5
06.06.2016 12:01:49	27.2	27.2	26.5	27.2	27.2	27.2	1560	0	0.7	26.5
06.06.2016 12:01:55	25.2	25.2	24.7	25.2	25.2	25.2	1566	0	0.5	24.7
06.06.2016 12:02:01	24.7	24.7	24.7	24.7	24.7	24.7	1572	0	0	24.7
06.06.2016 12:02:07	24.5	24.5	24.3	24.5	24.5	24.5	1578	0	0.2	24.3
06.06.2016 12:02:13	29.3	26	25.3	29.3	29	26.5	1584	3.3	0.7	25.3
06.06.2016 12:02:19	32.2	24.7	24.2	32.6	30.6	25.3	1590	7.5	0.5	24.2
06.06.2016 12:02:25	25.3	25.3	25.2	25.3	25.3	25.3	1596	0	0.1	25.2
06.06.2016 12:02:31	26.6	26.6	26	26.6	26.6	26.6	1602	0	0.6	26
06.06.2016 12:02:37	27.8	27.5	26.1	27.8	27.8	27.6	1608	0.3	1.4	26.1
06.06.2016 12:02:43	27.7	25.9	25.2	27.7	27.7	26.7	1614	1.8	0.7	25.2
06.06.2016 12:02:49	29.2	28.2	27.2	29.2	29.2	28.6	1620	1	1	27.2
06.06.2016 12:02:55	26.6	26.6	26.1	26.6	26.6	26.6	1626	0	0.5	26.1
06.06.2016 12:03:01	29.2	28.5	26.2	29.2	29.2	28.8	1632	0.7	2.3	26.2
06.06.2016 12:03:07	24.4	24.4	24.4	24.4	24.4	24.4	1638	0	0	24.4
06.06.2016 12:03:13	28.3	27.6	25.9	28.3	28.3	27.9	1644	0.7	1.7	25.9
06.06.2016 12:03:19	21.5	21.5	21.5	21.5	21.5	21.5	1650	0	0	21.5
06.06.2016 12:03:25	26.3	25.7	25	26.3	26.3	26	1656	0.6	0.7	25
06.06.2016 12:03:31	38.4	29.9	27.2	38.8	36.8	31	1662	8.5	2.7	27.2
06.06.2016 12:03:37	26.4	26.4	25.7	26.4	26.4	26.4	1668	0	0.7	25.7
06.06.2016 12:03:43	26.4	26.3	25.9	26.4	26.4	26.4	1674	0.1	0.4	25.9
06.06.2016 12:03:49	27.3	27.3	27.3	27.3	27.3	27.3	1680	0	0	27.3
06.06.2016 12:03:55	29.3	28	26.4	29.3	29.3	28.5	1686	1.3	1.6	26.4
06.06.2016 12:04:01	26.1	25.3	24.6	26.1	26.1	25.7	1692	0.8	0.7	24.6
06.06.2016 12:04:07	24.7	24.6	24.1	24.7	24.7	24.7	1698	0.1	0.5	24.1
06.06.2016 12:04:13	26.8	25.8	25.2	26.8	26.8	26.3	1704	1	0.6	25.2
06.06.2016 12:04:19	27.9	25.6	24.1	27.9	27.8	26.2	1710	2.3	1.5	24.1
06.06.2016 12:04:25	24.4	24.4	24.2	24.4	24.4	24.4	1716	0	0.2	24.2
06.06.2016 12:04:31	24	24	24	24	24	24	1722	0	0	24
06.06.2016 12:04:37	26.9	26.4	25	26.9	26.9	26.6	1728	0.5	1.4	25
06.06.2016 12:04:43	28.9	28.9	28.7	28.9	28.9	28.9	1734	0	0.2	28.7
06.06.2016 12:04:49	26.2	26.2	26	26.2	26.2	26.2	1740	0	0.2	26
06.06.2016 12:04:55	26.6	23.8	23.5	64.1	34.2	24.7	1746	2.8	0.3	23.5
06.06.2016 12:05:01	25.9	25.9	25.8	25.9	25.9	25.9	1752	0	0.1	25.8
06.06.2016 12:05:07	29.3	29.1	28.1	87	36.2	29.2	1758	0.2	1	28.1
06.06.2016 12:05:13	26.7	26.4	24.8	26.7	26.7	26.5	1764	0.3	1.6	24.8
06.06.2016 12:05:19	27.8	27.8	27.3	27.8	27.8	27.8	1770	0	0.5	27.3
06.06.2016 12:05:25	38.4	29.1	28.1	43.4	37.6	30	1776	9.3	1	28.1
06.06.2016 12:05:31	29.3	29.2	28.2	29.3	29.3	29.2	1782	0.1	1	28.2
06.06.2016 12:05:37	37.2	30.3	28.1	37.2	36.5	31.3	1788	6.9	2.2	28.1
06.06.2016 12:05:43	32.7	29	28	32.7	32.6	30.3	1794	3.7	1	28
06.06.2016 12:05:49	29.8	28.6	27.1	29.8	29.8	29.1	1800	1.2	1.5	27.1
06.06.2016 12:05:55	28.8	26.4	25	28.8	28.7	27.1	1806	2.4	1.4	25
06.06.2016 12:06:01	43.4	27.1	25.7	44.1	40.1	28.5	1812	16.3	1.4	25.7
06.06.2016 12:06:07	25.1	25.1	25.1	25.1	25.1	25.1	1818	0	0	25.1
06.06.2016 12:06:13	26.9	26.8	26.3	26.9	26.9	26.8	1824	0.1	0.5	26.3
06.06.2016 12:06:19	24.7	24.7	24.7	24.7	24.7	24.7	1830	0	0	24.7
06.06.2016 12:06:25	28.2	28.2	27.6	28.2	28.2	28.2	1836	0	0.6	27.6
06.06.2016 12:06:31	35.7	29.9	28.1	35.7	34.9	30.7	1842	5.8	1.8	28.1
06.06.2016 12:06:37	23.7	23.7	23.4	23.7	23.7	23.7	1848	0	0.3	23.4
06.06.2016 12:06:43	37.6	28.1	25.9	64.1	43.3	28.6	1854	9.5	2.2	25.9
06.06.2016 12:06:49	29.7	27.7	26.5	29.7	29.6	28.6	1860	2	1.2	26.5
06.06.2016 12:06:55	29.2	28.2	25	29.2	29.2	28.6	1866	1	3.2	25
06.06.2016 12:07:01	26.1	26	25.5	26.1	26.1	26	1872	0.1	0.5	25.5
06.06.2016 12:07:07	31.7	29.4	28	53.3	38.3	30	1878	2.3	1.4	28
06.06.2016 12:07:13	27.2	27.2	27	27.2	27.2	27.2	1884	0	0.2	27
06.06.2016 12:07:19	32.4	25.6	24.6	32.7	30.8	25.9	1890	6.8	1	24.6
06.06.2016 12:07:25	25.1	25.1	25	25.1	25.1	25.1	1896	0	0.1	25
06.06.2016 12:07:31	27.3	26.3	25.7	27.3	27.3	26.7	1902	1	0.6	25.7
06.06.2016 12:07:37	26.2	25.6	23.6	26.2	26.2	25.9	1908	0.6	2	23.6
06.06.2016 12:07:43	28.7	28.6	28.2	28.7	28.7	28.7	1914	0.1	0.4	28.2
06.06.2016 12:07:49	33	27.3	26.2	33	32.2	28.1	1920	5.7	1.1	26.2
06.06.2016 12:07:55	30.3	27.9	26.5	51.9	36.9	28.5	1926	2.4	1.4	26.5
06.06.2016 12:08:01	26.9	26.9	26.9	26.9	26.9	26.9	1932	0	0	26.9
06.06.2016 12:08:07	26.7	26.2	24.8	26.7	26.7	26.4	1938	0.5	1.4	24.8
06.06.2016 12:08:13	25.5	25.5	25.4	25.5	25.5	25.5	1944	0	0.1	25.4
06.06.2016 12:08:19	26.5	26.5	26.4	26.5	26.5	26.5	1950	0	0.1	26.4
06.06.2016 12:08:25	37.6	28.3	27.2	42.6	36.7	29.2	1956	9.3	1.1	27.2
06.06.2016 12:08:31	29.6	27.9	26.1	29.6	29.6	28.7	1962	1.7	1.8	26.1
06.06.2016 12:08:37	32.9	31.2	25.5	32.9	32.9	31.9	1968	1.7	5.7	25.5
06.06.2016 12:08:43	29.7	29.4	27.9	29.7	29.7	29.5	1974	0.3	1.5	27.9
06.06.2016 12:08:49	24.8	24.8	24.6	24.8	24.8	24.8	1980	0	0.2	24.6
06.06.2016 12:08:55	24.4	24.4	23.8	24.4	24.4	24.4	1986	0	0.6	23.8
06.06.2016 12:09:01	40.4	24.8	24.2	67.3	44.6	25.3	1992	15.6	0.6	24.2
06.06.2016 12:09:07	24.8	24.8	24.8	24.8	24.8	24.8	1998	0	0	24.8
06.06.2016 12:09:13	26.2	26.2	26.2	26.2	26.2	26.2	2004	0	0	26.2
06.06.2016 12:09:19	28.3	28.1	27.2	28.3	28.3	28.2	2010	0.2	0.9	27.2
06.06.2016 12:09:25	28.8	28.7	28.1	28.8	28.8	28.8	2016	0.1	0.6	28.1
06.06.2016 12:09:31	30.2	27.8	26.8	51.8	36.8	28.4	2022	2.4	1	26.8
06.06.2016 12:09:37	32.3	28.1	27.8	32.3	32.2	29.3	2028	4.2	0.3	27.8
06.06.2016 12:09:43	29.1	27.3	26.7	29.1	29.1	28.1	2034	1.8	0.6	26.7
06.06.2016 12:09:49	29	28.7	27.7	29	29	28.8	2040	0.3	1	27.7
06.06.2016 12:09:55	27	26.2	24.7	27	27	26.6	2046	0.8	1.5	24.7
06.06.2016 12:10:01	27.1	27	26.6	27.1	27.1	27	2052	0.1	0.4	26.6
06.06.2016 12:10:07	28	28	27.9	28	28	28	2058	0	0.1	27.9
06.06.2016 12:10:13	28.8	28.8	28.4	28.8	28.8	28.8	2064	0	0.4	28.4
06.06.2016 12:10:19	46	30	29.4	51.3	43.5	31.2	2070	16	0.6	29.4
06.06.2016 12:10:25	30.8	30.1	28.5	30.8	30.8	30.4	2076	0.7	1.6	28.5
06.06.2016 12:10:31	28.9	28.9	28.5	28.9	28.9	28.9	2082	0	0.4	28.5
06.06.2016 12:10:37	37.7	23.6	23.1	43.1	35.3	23.9	2088	14.1	0.5	23.1
06.06.2016 12:10:43	26.9	25	24	64.4	34.5	25.5	2094	1.9	1	24
06.06.2016 12:10:49	32.2	28.5	28.1	53.8	38.7	29.3	2100	3.7	0.4	28.1
06.06.2016 12:10:55	31.3	30.5	29	31.3	31.3	30.8	2106	0.8	1.5	29
06.06.2016 12:11:01	25.9	25.9	25.4	25.9	25.9	25.9	2112	0	0.5	25.4
06.06.2016 12:11:07	39.2	28.3	27.1	44.2	38.3	29.6	2118	10.9	1.2	27.1
06.06.2016 12:11:13	31.9	30.4	27.4	31.9	31.9	31.1	2124	1.5	3	27.4
06.06.2016 12:11:19	26.3	26.3	26.3	26.3	26.3	26.3	2130	0	0	26.3
06.06.2016 12:11:25	34.8	28.5	27.9	295.3	36.4	29.9	2136	6.3	0.6	27.9
06.06.2016 12:11:31	26.1	26.1	25.8	26.1	26.1	26.1	2142	0	0.3	25.8
06.06.2016 12:11:37	27.6	27.1	25.7	27.6	27.6	27.3	2148	0.5	1.4	25.7
06.06.2016 12:11:43	26.3	26.3	25.8	26.3	26.3	26.3	2154	0	0.5	25.8
06.06.2016 12:11:49	33.2	28.5	25.9	33.2	32.9	29.6	2160	4.7	2.6	25.9
06.06.2016 12:11:55	30.6	28.6	27.4	30.6	30.6	29.5	2166	2	1.2	27.4
06.06.2016 12:12:01	25.5	25.4	24.8	25.5	25.5	25.5	2172	0.1	0.6	24.8
06.06.2016 12:12:07	29.4	29.3	28	29.4	29.4	29.4	2178	0.1	1.3	28
06.06.2016 12:12:13	38.1	29.4	28.2	95.8	44.1	30.8	2184	8.7	1.2	28.2
06.06.2016 12:12:19	31.7	30.2	28.8	89.3	38.6	30.9	2190	1.5	1.4	28.8
06.06.2016 12:12:25	36.4	30	28.9	36.4	36	31.5	2196	6.4	1.1	28.9
06.06.2016 12:12:31	38.2	30.2	28.8	75.7	45	31.7	2202	8	1.4	28.8
06.06.2016 12:12:37	37.8	31.7	29.6	59.4	44.1	33	2208	6.1	2.1	29.6
06.06.2016 12:12:43	47.6	30.1	28.4	57.6	45.9	31.1	2214	17.5	1.7	28.4
06.06.2016 12:12:49	32.5	28.4	28.2	189.8	44.5	29.5	2220	4.1	0.2	28.2
06.06.2016 12:12:55	26.5	26.5	26.1	26.5	26.5	26.5	2226	0	0.4	26.1
06.06.2016 12:13:01	37.7	29.7	27.3	38.1	36.1	30.5	2232	8	2.4	27.3
06.06.2016 12:13:07	40.5	25.5	24.8	45.8	38	26.2	2238	15	0.7	24.8
06.06.2016 12:13:13	28.3	28.3	27.4	28.3	28.3	28.3	2244	0	0.9	27.4
06.06.2016 12:13:19	37.7	26	24.7	224.5	39.8	27.2	2250	11.7	1.3	24.7
06.06.2016 12:13:25	37.3	27.3	26.9	42.3	36.4	28.2	2256	10	0.4	26.9
06.06.2016 12:13:31	41.2	27.5	26.7	41.5	38.9	28.8	2262	13.7	0.8	26.7
06.06.2016 12:13:37	37.5	27.1	25.9	42.5	36.6	28.1	2268	10.4	1.2	25.9
06.06.2016 12:13:43	25.4	25.4	25.4	25.4	25.4	25.4	2274	0	0	25.4
06.06.2016 12:13:49	31.1	30.4	27.1	31.1	31.1	30.7	2280	0.7	3.3	27.1
06.06.2016 12:13:55	41.1	29.7	26.3	84.7	52.7	31.1	2286	11.4	3.4	26.3
06.06.2016 12:14:01	26.8	26.7	25.8	26.8	26.8	26.8	2292	0.1	0.9	25.8
06.06.2016 12:14:07	32	25.2	24.1	32.3	30.3	25.5	2298	6.8	1.1	24.1
06.06.2016 12:14:13	32.2	28.8	24.5	32.2	32.1	30.3	2304	3.4	4.3	24.5
06.06.2016 12:14:19	40.1	28.6	28.1	40.5	38.4	30.3	2310	11.5	0.5	28.1
06.06.2016 12:14:25	39.2	28.5	27.7	39.2	38	30.2	2316	10.7	0.8	27.7
06.06.2016 12:14:31	28.8	28.7	27.1	28.8	28.8	28.8	2322	0.1	1.6	27.1
06.06.2016 12:14:37	27.1	25.9	24.2	27.1	27.1	26.4	2328	1.2	1.7	24.2
06.06.2016 12:14:43	24.9	24.8	24.3	24.9	24.9	24.8	2334	0.1	0.5	24.3
06.06.2016 12:14:49	47.8	26.4	24.9	48.9	42.9	27.8	2340	21.4	1.5	24.9
06.06.2016 12:14:55	32.3	25.1	25	32.3	31.5	26.6	2346	7.2	0.1	25
06.06.2016 12:15:01	38.3	29.9	26.6	43.3	37.5	30.4	2352	8.4	3.3	26.6
06.06.2016 12:15:07	27.4	27.4	27.1	27.4	27.4	27.4	2358	0	0.3	27.1
06.06.2016 12:15:13	43	30.1	27.4	48	41.8	31.3	2364	12.9	2.7	27.4
06.06.2016 12:15:19	38.8	29.6	26.7	76.7	44.9	31	2370	9.2	2.9	26.7
06.06.2016 12:15:25	29.8	28.6	27.9	29.8	29.8	29.1	2376	1.2	0.7	27.9
06.06.2016 12:15:31	28.7	26	25.5	50.3	35.3	26.8	2382	2.7	0.5	25.5
06.06.2016 12:15:37	40.9	30.1	26.7	45.9	40	31.4	2388	10.8	3.4	26.7
06.06.2016 12:15:43	34.8	28.8	25.9	78	47.9	30.2	2394	6	2.9	25.9
06.06.2016 12:15:49	38.3	28.6	26.4	60.2	43.2	29.7	2400	9.7	2.2	26.4
06.06.2016 12:15:55	38.4	26.9	26.1	225.2	40.6	28.4	2406	11.5	0.8	26.1
06.06.2016 12:16:01	25.7	25.6	24.5	25.7	25.7	25.7	2412	0.1	1.1	24.5
06.06.2016 12:16:07	31.1	28.5	24.5	31.1	31.1	29.6	2418	2.6	4	24.5
06.06.2016 12:16:13	28.5	26.3	25.6	28.5	28.5	26.9	2424	2.2	0.7	25.6
06.06.2016 12:16:19	28.3	28	27.4	28.3	28.3	28.1	2430	0.3	0.6	27.4
06.06.2016 12:16:25	29.8	28.2	25.8	29.8	29.8	28.9	2436	1.6	2.4	25.8
06.06.2016 12:16:31	28	27.5	26.7	28	28	27.8	2442	0.5	0.8	26.7
06.06.2016 12:16:37	41.3	32	28.6	46.3	40.5	32.9	2448	9.3	3.4	28.6
06.06.2016 12:16:43	36	32.7	30.8	36	35.9	33.8	2454	3.3	1.9	30.8
06.06.2016 12:16:49	26.4	26.4	26.3	26.4	26.4	26.4	2460	0	0.1	26.3
06.06.2016 12:16:55	31.7	28	26.4	31.7	31.4	28.6	2466	3.7	1.6	26.4
06.06.2016 12:17:01	23.9	23.9	23.9	23.9	23.9	23.9	2472	0	0	23.9
06.06.2016 12:17:07	26.2	26.2	26.2	26.2	26.2	26.2	2478	0	0	26.2
06.06.2016 12:17:13	25.6	25.6	25.6	25.6	25.6	25.6	2484	0	0	25.6
06.06.2016 12:17:19	28.4	26.2	24.7	28.4	28.3	26.8	2490	2.2	1.5	24.7
06.06.2016 12:17:25	34.6	33.2	29.7	34.6	34.6	33.8	2496	1.4	3.5	29.7
06.06.2016 12:17:31	27.8	23.7	23.2	209.7	30.8	25.2	2502	4.1	0.5	23.2	0
06.06.2016 12:17:37	25.1	25.1	24.5	25.1	25.1	25.1	2508	0	0.6	24.5	6
06.06.2016 12:17:43	27.8	27	25.2	27.8	27.8	27.3	2514	0.8	1.8	25.2	12
06.06.2016 12:17:49	28.4	28.3	26.9	28.4	28.4	28.3	2520	0.1	1.4	26.9	18
06.06.2016 12:17:55	25.4	25.4	24.9	25.4	25.4	25.4	2526	0	0.5	24.9	24
06.06.2016 12:18:01	31.1	29.1	28	31.1	31.1	29.7	2532	2	1.1	28	30
06.06.2016 12:18:07	34	27	25.1	34.4	32.4	27.4	2538	7	1.9	25.1	36
06.06.2016 12:18:13	61.2	29.2	27.9	71.9	56.2	31.2	2544	32	1.3	27.9	42
06.06.2016 12:18:19	43.3	27.4	26.7	48.7	40.9	28.5	2550	15.9	0.7	26.7	48
06.06.2016 12:18:25	34.1	28	27.2	55.7	40.7	29.9	2556	6.1	0.8	27.2	54
06.06.2016 12:18:31	30.3	27.5	26.4	30.3	30.2	28.4	2562	2.8	1.1	26.4	60
06.06.2016 12:18:37	38.8	28.1	27.7	43.8	37.9	29.3	2568	10.7	0.4	27.7	66
06.06.2016 12:18:43	27.7	27.7	27.6	27.7	27.7	27.7	2574	0	0.1	27.6	72
06.06.2016 12:18:49	30.6	27.5	26.4	52.1	37.1	28	2580	3.1	1.1	26.4	78
06.06.2016 12:18:55	27.9	27.9	27.9	27.9	27.9	27.9	2586	0	0	27.9	84
06.06.2016 12:19:01	26.8	26.8	26.8	26.8	26.8	26.8	2592	0	0	26.8	90
06.06.2016 12:19:07	26	25.3	24.4	26	26	25.6	2598	0.7	0.9	24.4	96
06.06.2016 12:19:13	26.7	26.7	26.6	26.7	26.7	26.7	2604	0	0.1	26.6	102
06.06.2016 12:19:19	27.9	27.4	26.5	27.9	27.9	27.6	2610	0.5	0.9	26.5	108
06.06.2016 12:19:25	28.5	28.5	28	28.5	28.5	28.5	2616	0	0.5	28	114
06.06.2016 12:19:31	26.2	26.1	25.4	26.2	26.2	26.1	2622	0.1	0.7	25.4	120
06.06.2016 12:19:37	30.3	30	29	30.3	30.3	30.1	2628	0.3	1	29	126
06.06.2016 12:19:43	28.5	28.5	28.5	28.5	28.5	28.5	2634	0	0	28.5	132
06.06.2016 12:19:49	27.8	27.8	27.7	27.8	27.8	27.8	2640	0	0.1	27.7	138
06.06.2016 12:19:55	33.6	30.8	30.1	33.6	33.5	32.1	2646	2.8	0.7	30.1	144
06.06.2016 12:20:01	27.9	27.9	27.9	27.9	27.9	27.9	2652	0	0	27.9	150
06.06.2016 12:20:07	28.2	28.2	28.2	28.2	28.2	28.2	2658	0	0	28.2	156
06.06.2016 12:20:13	29.1	29.1	28.6	29.1	29.1	29.1	2664	0	0.5	28.6	162
06.06.2016 12:20:19	35	30.3	28.4	35	34.9	31.7	2670	4.7	1.9	28.4	168
06.06.2016 12:20:25	28.1	28.1	27.9	28.1	28.1	28.1	2676	0	0.2	27.9	174
06.06.2016 12:20:31	27.8	27.8	27.7	27.8	27.8	27.8	2682	0	0.1	27.7	180
06.06.2016 12:20:37	35.9	28.9	27.5	36.2	34.3	29.3	2688	7	1.4	27.5	186
06.06.2016 12:20:43	27.4	27.4	27.4	27.4	27.4	27.4	2694	0	0	27.4	192
06.06.2016 12:20:49	29.2	27.3	26.8	29.2	29.1	27.8	2700	1.9	0.5	26.8	198
06.06.2016 12:20:55	28.7	28.7	28.6	28.7	28.7	28.7	2706	0	0.1	28.6	204
06.06.2016 12:21:01	29.6	29.3	28.1	29.6	29.6	29.4	2712	0.3	1.2	28.1	210
06.06.2016 12:21:07	29.8	29.7	28.6	29.8	29.8	29.8	2718	0.1	1.1	28.6	216
06.06.2016 12:21:13	26.5	26	25.2	26.5	26.5	26.2	2724	0.5	0.8	25.2	222
06.06.2016 12:21:19	27.3	27.3	26.8	27.3	27.3	27.3	2730	0	0.5	26.8	228
06.06.2016 12:21:25	28.6	28.5	28.1	28.6	28.6	28.6	2736	0.1	0.4	28.1	234
06.06.2016 12:21:31	25.4	25.4	25.4	25.4	25.4	25.4	2742	0	0	25.4	240
06.06.2016 12:21:37	37.3	31	29.9	37.3	36.5	32.1	2748	6.3	1.1	29.9	246
06.06.2016 12:21:43	39.3	28.5	28.4	39.3	38	29.8	2754	10.8	0.1	28.4	252
06.06.2016 12:21:49	30.4	30.3	29.8	30.4	30.4	30.3	2760	0.1	0.5	29.8	258
06.06.2016 12:21:55	38.3	30.4	29.3	38.6	36.6	31.2	2766	7.9	1.1	29.3	264
06.06.2016 12:22:01	28.5	28.5	28.5	28.5	28.5	28.5	2772	0	0	28.5	270
06.06.2016 12:22:07	32.6	30.6	29.8	32.6	32.5	31.1	2778	2	0.8	29.8	276
06.06.2016 12:22:13	29.7	29.3	28.4	29.7	29.7	29.5	2784	0.4	0.9	28.4	282
06.06.2016 12:22:19	26.5	26.5	26.5	26.5	26.5	26.5	2790	0	0	26.5	288
06.06.2016 12:22:25	27.9	27.9	27.7	27.9	27.9	27.9	2796	0	0.2	27.7	294
06.06.2016 12:22:31	28.8	28.8	28.8	28.8	28.8	28.8	2802	0	0	28.8	300
06.06.2016 12:22:37	27.9	27.9	27.4	27.9	27.9	27.9	2808	0	0.5	27.4	306
06.06.2016 12:22:43	26.6	26.6	26.1	26.6	26.6	26.6	2814	0	0.5	26.1	312
06.06.2016 12:22:49	28.7	28.7	28.7	28.7	28.7	28.7	2820	0	0	28.7	318
06.06.2016 12:22:55	27.9	27.7	26.5	27.9	27.9	27.8	2826	0.2	1.2	26.5	324
06.06.2016 12:23:01	27.6	27.6	27.1	27.6	27.6	27.6	2832	0	0.5	27.1	330
06.06.2016 12:23:07	33.7	32.4	28.1	33.7	33.7	33	2838	1.3	4.3	28.1	336
06.06.2016 12:23:13	29.3	29.1	28.4	29.3	29.3	29.2	2844	0.2	0.7	28.4	342
06.06.2016 12:23:19	33	31.7	29.2	33	33	32.2	2850	1.3	2.5	29.2	348
06.06.2016 12:23:25	28.6	28.6	28.6	28.6	28.6	28.6	2856	0	0	28.6	354
06.06.2016 12:23:31	30.4	30.3	29.3	30.4	30.4	30.4	2862	0.1	1	29.3	360
06.06.2016 12:23:37	50.2	33.3	32.5	55.6	47.8	34.9	2868	16.9	0.8	32.5	366
06.06.2016 12:23:43	46.8	33.3	30.1	46.8	45.1	35.5	2874	13.5	3.2	30.1	372
06.06.2016 12:23:49	54	37.2	32	59	52.3	39.4	2880	16.8	5.2	32	378
06.06.2016 12:23:55	62.9	39.6	28.6	89.4	68.4	45.2	2886	23.3	11	28.6	384
06.06.2016 12:24:01	113.2	49.9	30.1	348.9	123	60.3	2892	63.3	19.8	30.1	390
06.06.2016 12:24:07	108	39.7	32.7	312.1	110	51.8	2898	68.3	7	32.7	396
06.06.2016 12:24:13	93.7	37.6	29.6	121	94.2	46.8	2904	56.1	8	29.6	402
06.06.2016 12:24:19	104.7	42.6	32.8	506.7	112	55.6	2910	62.1	9.8	32.8	408
06.06.2016 12:24:25	134	50.4	36.4	145.3	122.5	61.2	2916	83.6	14	36.4	414
06.06.2016 12:24:31	100.4	42.1	34	169.8	108.3	50.4	2922	58.3	8.1	34	420
06.06.2016 12:24:37	72.3	37.8	31.4	254.8	71.1	44.2	2928	34.5	6.4	31.4	426
06.06.2016 12:24:43	63.7	44.8	32.9	163.3	68	50.1	2934	18.9	11.9	32.9	432
06.06.2016 12:24:49	56.3	38.3	31.1	77.9	62	42.8	2940	18	7.2	31.1	438
06.06.2016 12:24:55	58.5	32.8	29.1	59.2	54.6	36.3	2946	25.7	3.7	29.1	444
06.06.2016 12:25:01	56.9	36.3	32.8	94.8	61.9	40	2952	20.6	3.5	32.8	450
06.06.2016 12:25:07	62.2	32.4	28.4	147.2	75.4	37.6	2958	29.8	4	28.4	456
06.06.2016 12:25:13	59.5	34.1	28.3	64.4	57.2	38.4	2964	25.4	5.8	28.3	462
06.06.2016 12:25:19	76.9	39.4	29.9	141.3	87.6	46	2970	37.5	9.5	29.9	468
06.06.2016 12:25:25	91.9	31	30.1	256.4	112.2	41.5	2976	60.9	0.9	30.1	474
06.06.2016 12:25:31	115.6	44.9	32.8	164.4	114.5	56.2	2982	70.7	12.1	32.8	480
06.06.2016 12:25:37	53.1	39.2	30.4	53.1	52.3	42.7	2988	13.9	8.8	30.4	486
06.06.2016 12:25:43	77.7	38.9	33.5	77.7	74.3	47.2	2994	38.8	5.4	33.5	492
06.06.2016 12:25:49	85.4	33.4	28.9	117	86.7	40	3000	52	4.5	28.9	498
06.06.2016 12:25:55	88.9	41.9	33.3	137	90.5	48.2	3006	47	8.6	33.3	504
06.06.2016 12:26:01	69	38.1	30.4	106.5	74.4	46	3012	30.9	7.7	30.4	510
06.06.2016 12:26:07	97.1	37	32.2	141	94.8	43.4	3018	60.1	4.8	32.2	516
06.06.2016 12:26:13	68.6	34.2	31	78.9	65	39.3	3024	34.4	3.2	31	522
06.06.2016 12:26:19	61.6	34.3	31.2	62	58.1	38.9	3030	27.3	3.1	31.2	528
06.06.2016 12:26:25	58.6	35.9	30.7	121.2	64.4	41.4	3036	22.7	5.2	30.7	534
06.06.2016 12:26:31	56.7	32.3	28.2	78.6	60	36.2	3042	24.4	4.1	28.2	540
06.06.2016 12:26:37	45.9	34.8	29.2	145.5	50.9	38.7	3048	11.1	5.6	29.2	546
06.06.2016 12:26:43	47.6	35.3	29.4	69.2	53.4	38.7	3054	12.3	5.9	29.4	552
06.06.2016 12:26:49	47.8	32.1	29.1	105.5	53.9	36.1	3060	15.7	3	29.1	558
06.06.2016 12:26:55	49	32.6	30.2	49.3	47.1	36.1	3066	16.4	2.4	30.2	564
06.06.2016 12:27:01	45.9	27.3	26.9	50.8	44.5	30.6	3072	18.6	0.4	26.9	570
06.06.2016 12:27:07	59.1	32.1	28.8	59.8	55.4	36.5	3078	27	3.3	28.8	576
06.06.2016 12:27:13	62.7	34.5	31.1	89.7	65.7	38	3084	28.2	3.4	31.1	582
06.06.2016 12:27:19	72.7	39.6	33.9	78.4	68.3	44.5	3090	33.1	5.7	33.9	588
06.06.2016 12:27:25	39.6	35.2	33	39.6	39.5	36.4	3096	4.4	2.2	33	594
06.06.2016 12:27:31	41.7	28.5	27.5	79.2	48.1	30.6	3102	13.2	1	27.5	600
06.06.2016 12:27:37	26.9	26.9	26.2	26.9	26.9	26.9	3108	0	0.7	26.2	606
06.06.2016 12:27:43	52.3	38.9	32.7	52.7	50.3	40.8	3114	13.4	6.2	32.7	612
06.06.2016 12:27:49	52.6	37	30.9	95.7	65.2	41	3120	15.6	6.1	30.9	618
06.06.2016 12:27:55	47.3	33.3	31	47.3	46.7	37.4	3126	14	2.3	31	624
06.06.2016 12:28:01	56.5	37.7	30.4	114.1	62	42.3	3132	18.8	7.3	30.4	630
06.06.2016 12:28:07	66.7	33.6	31.2	67.4	61.8	38.4	3138	33.1	2.4	31.2	636
06.06.2016 12:28:13	38.5	29.3	28.1	38.5	37.7	31.7	3144	9.2	1.2	28.1
06.06.2016 12:28:19	51.2	31.6	28.9	51.9	47.7	33.9	3150	19.6	2.7	28.9
06.06.2016 12:28:25	46.7	27	26.1	52	44.2	29.5	3156	19.7	0.9	26.1
06.06.2016 12:28:31	53.6	37.2	31.7	58.5	52.5	40.2	3162	16.4	5.5	31.7
06.06.2016 12:28:37	43.6	28.5	27.9	43.9	41.7	31.4	3168	15.1	0.6	27.9
06.06.2016 12:28:43	39.4	35.3	29.2	39.4	39.3	36.8	3174	4.1	6.1	29.2
06.06.2016 12:28:49	36.5	31.6	29.3	36.5	36.4	33.4	3180	4.9	2.3	29.3
06.06.2016 12:28:55	45.8	31.4	30	89.3	57.3	33.8	3186	14.4	1.4	30
06.06.2016 12:29:01	44.7	31.4	29.1	49.6	43.7	33.7	3192	13.3	2.3	29.1
06.06.2016 12:29:07	40.8	35	30.7	40.8	40.6	36.8	3198	5.8	4.3	30.7
06.06.2016 12:29:13	40.4	35.2	29.8	40.4	40.3	37.1	3204	5.2	5.4	29.8
06.06.2016 12:29:19	62.3	40.6	33.3	62.3	60.3	45.4	3210	21.7	7.3	33.3
06.06.2016 12:29:25	53.4	37.1	32.6	53.8	51.6	40.9	3216	16.3	4.5	32.6
06.06.2016 12:29:31	47.7	32.4	31.2	48.1	45.2	34.1	3222	15.3	1.2	31.2
06.06.2016 12:29:37	32.6	32.5	31.6	32.6	32.6	32.6	3228	0.1	0.9	31.6
06.06.2016 12:29:43	50.4	38.4	33.4	50.8	48.7	40.6	3234	12	5	33.4
06.06.2016 12:29:49	45.9	35.9	31	45.9	44.8	37.6	3240	10	4.9	31
06.06.2016 12:29:55	38.9	33.1	30.5	38.9	38.1	34	3246	5.8	2.6	30.5
06.06.2016 12:30:01	56.1	31.6	29.2	61.5	52.8	34.5	3252	24.5	2.4	29.2
06.06.2016 12:30:07	41.9	32.5	30.2	41.9	41.5	35	3258	9.4	2.3	30.2
06.06.2016 12:30:13	34.9	33.8	31.8	34.9	34.9	34.3	3264	1.1	2	31.8
06.06.2016 12:30:19	31.4	30.1	28.1	31.4	31.4	30.7	3270	1.3	2	28.1
06.06.2016 12:30:25	50.2	32.3	30.6	55.5	47.7	33.9	3276	17.9	1.7	30.6
06.06.2016 12:30:31	40.9	31.3	29.2	45.9	40.1	32.4	3282	9.6	2.1	29.2
06.06.2016 12:30:37	40	30.4	28.3	40	39.1	32.3	3288	9.6	2.1	28.3
06.06.2016 12:30:43	45.5	35.1	33.2	45.5	43.9	36.3	3294	10.4	1.9	33.2
06.06.2016 12:30:49	46.3	34	32.5	228.1	47.9	35.4	3300	12.3	1.5	32.5
06.06.2016 12:30:55	30.7	30.7	30.6	30.7	30.7	30.7	3306	0	0.1	30.6
06.06.2016 12:31:01	44.2	34.8	30.2	65.8	50.6	37.4	3312	9.4	4.6	30.2
06.06.2016 12:31:07	34.6	28	27	72.1	41.4	28.8	3318	6.6	1	27
06.06.2016 12:31:13	38.5	36.2	34.1	76	46.2	36.9	3324	2.3	2.1	34.1
06.06.2016 12:31:19	38.8	36	33.3	38.8	38.7	37.2	3330	2.8	2.7	33.3
06.06.2016 12:31:25	44	32.3	28	44	42.9	34.4	3336	11.7	4.3	28
06.06.2016 12:31:31	38.5	29.3	28.6	38.9	36.8	30.3	3342	9.2	0.7	28.6
06.06.2016 12:31:37	24.3	24.3	24.3	24.3	24.3	24.3	3348	0	0	24.3
06.06.2016 12:31:43	39.9	31.9	30.5	40.3	38.3	32.7	3354	8	1.4	30.5
06.06.2016 12:31:49	39.8	30.1	29.6	44.8	38.9	31.2	3360	9.7	0.5	29.6
06.06.2016 12:31:55	36.2	29.1	27.9	36.2	35.8	31.3	3366	7.1	1.2	27.9
06.06.2016 12:32:01	33.3	30.3	26.8	33.3	33.3	31.7	3372	3	3.5	26.8
06.06.2016 12:32:07	33.5	28.1	27.5	33.5	32.7	28.8	3378	5.4	0.6	27.5
06.06.2016 12:32:13	33.4	29.6	28.1	33.4	33.3	30.9	3384	3.8	1.5	28.1
06.06.2016 12:32:19	41	29.7	27.1	46	40.1	31.1	3390	11.3	2.6	27.1
06.06.2016 12:32:25	30.8	28.1	27.7	30.8	30.8	29.3	3396	2.7	0.4	27.7
06.06.2016 12:32:31	41.1	30.2	27.3	41.1	39.5	31.6	3402	10.9	2.9	27.3
06.06.2016 12:32:37	32.3	30.1	29.2	32.3	32.2	30.7	3408	2.2	0.9	29.2
06.06.2016 12:32:43	35.6	31.6	30.4	35.6	35.5	32.7	3414	4	1.2	30.4
06.06.2016 12:32:49	44.1	28	28	49.1	42.3	29.5	3420	16.1	0	28
06.06.2016 12:32:55	36.8	33	30.9	36.8	36.5	33.7	3426	3.8	2.1	30.9
06.06.2016 12:33:01	29.9	29.8	28.7	29.9	29.9	29.8	3432	0.1	1.1	28.7
06.06.2016 12:33:07	35.3	32.1	30.9	56.9	41.9	32.7	3438	3.2	1.2	30.9
06.06.2016 12:33:13	36.4	33.1	31.6	36.4	36.1	33.6	3444	3.3	1.5	31.6
06.06.2016 12:33:19	33.4	30.4	28.2	33.4	33.3	31.4	3450	3	2.2	28.2
06.06.2016 12:33:25	30.6	27.1	26.4	30.6	30.5	28.3	3456	3.5	0.7	26.4
06.06.2016 12:33:31	27.4	27.3	25.9	27.4	27.4	27.4	3462	0.1	1.4	25.9
06.06.2016 12:33:37	38.2	27.1	26.5	43.2	37.2	28.1	3468	11.1	0.6	26.5
06.06.2016 12:33:43	30.5	29.4	28.3	30.5	30.5	29.9	3474	1.1	1.1	28.3
06.06.2016 12:33:49	32.7	30.8	29.8	54.3	39.3	31.2	3480	1.9	1	29.8
06.06.2016 12:33:55	48	32.5	32.5	48.7	44.8	33.9	3486	15.5	0	32.5
06.06.2016 12:34:01	68.7	31.7	30.6	267.4	83.8	33.7	3492	37	1.1	30.6
06.06.2016 12:34:07	29.4	27.9	27.3	29.4	29.4	28.6	3498	1.5	0.6	27.3
06.06.2016 12:34:13	33	32	29.7	33	33	32.5	3504	1	2.3	29.7
06.06.2016 12:34:19	40.4	36.2	32.9	40.4	40.3	37.7	3510	4.2	3.3	32.9
06.06.2016 12:34:25	34.9	32.4	31	34.9	34.8	33.2	3516	2.5	1.4	31
06.06.2016 12:34:31	31.5	31.5	31.3	31.5	31.5	31.5	3522	0	0.2	31.3
06.06.2016 12:34:37	38.5	32.6	30.3	38.5	38.2	33.9	3528	5.9	2.3	30.3
06.06.2016 12:34:43	56.8	33.3	31	88.3	61.3	35.5	3534	23.5	2.3	31
06.06.2016 12:34:49	33.4	30.7	28.9	33.4	33.3	31.5	3540	2.7	1.8	28.9
06.06.2016 12:34:55	28.7	28.2	26.8	28.7	28.7	28.4	3546	0.5	1.4	26.8
06.06.2016 12:35:01	28.6	28.4	27.4	86.2	35.5	28.5	3552	0.2	1	27.4
06.06.2016 12:35:07	36.1	28.9	27.5	36.1	35.2	30.3	3558	7.2	1.4	27.5
06.06.2016 12:35:13	45.3	34.7	31.4	71.8	51	35.7	3564	10.6	3.3	31.4
06.06.2016 12:35:19	43.8	33.1	30.6	44.1	42	34.4	3570	10.7	2.5	30.6
06.06.2016 12:35:25	36.9	31.6	30.5	36.9	36.1	32.2	3576	5.3	1.1	30.5
06.06.2016 12:35:31	31.5	31.5	30.9	31.5	31.5	31.5	3582	0	0.6	30.9
06.06.2016 12:35:37	32.3	31.3	30.6	69.8	40	31.8	3588	1	0.7	30.6
06.06.2016 12:35:43	34	31.7	30.1	34	33.9	32.4	3594	2.3	1.6	30.1
06.06.2016 12:35:49	36.2	33.8	31.2	36.2	36.2	34.9	3600	2.4	2.6	31.2
06.06.2016 12:35:55	47	34.2	29.2	47.3	45.2	36.4	3606	12.8	5	29.2
06.06.2016 12:36:01	31.1	31.1	30.7	31.1	31.1	31.1	3612	0	0.4	30.7
06.06.2016 12:36:07	34.2	29.5	28.5	34.2	34.1	31.2	3618	4.7	1	28.5
06.06.2016 12:36:13	30	28.3	27.9	30	30	29	3624	1.7	0.4	27.9
06.06.2016 12:36:19	28.6	28.3	26.8	28.6	28.6	28.4	3630	0.3	1.5	26.8
06.06.2016 12:36:25	30.8	29.8	28.8	30.8	30.8	30.3	3636	1	1	28.8
06.06.2016 12:36:31	28	27.4	26	28	28	27.7	3642	0.6	1.4	26
06.06.2016 12:36:37	37.3	27.8	27.2	37.6	35.6	28.9	3648	9.5	0.6	27.2
06.06.2016 12:36:43	32.2	30.7	27.2	32.2	32.2	31.4	3654	1.5	3.5	27.2
06.06.2016 12:36:49	29.1	28.5	27.4	29.1	29.1	28.8	3660	0.6	1.1	27.4
06.06.2016 12:36:55	35.6	32.8	29.8	35.6	35.5	33.7	3666	2.8	3	29.8
06.06.2016 12:37:01	28.5	28.5	28	28.5	28.5	28.5	3672	0	0.5	28
06.06.2016 12:37:07	44.3	33.1	29.9	70.9	50.1	34.4	3678	11.2	3.2	29.9
06.06.2016 12:37:13	52	33.5	32.8	57	50	35.4	3684	18.5	0.7	32.8
06.06.2016 12:37:19	52.7	33.4	32.8	53.4	48.6	34.8	3690	19.3	0.6	32.8
06.06.2016 12:37:25	42.6	27.4	27.4	43	40	29	3696	15.2	0	27.4
06.06.2016 12:37:31	28.3	28.3	28.1	28.3	28.3	28.3	3702	0	0.2	28.1
06.06.2016 12:37:37	30	30	29.4	30	30	30	3708	0	0.6	29.4
06.06.2016 12:37:43	32	29.2	28.6	32	31.9	30.1	3714	2.8	0.6	28.6
06.06.2016 12:37:49	42.6	36.7	34.9	42.6	42.2	37.9	3720	5.9	1.8	34.9
06.06.2016 12:37:55	33.8	33.8	33.1	33.8	33.8	33.8	3726	0	0.7	33.1
06.06.2016 12:38:01	39.6	31.3	29.1	61.6	44.6	31.8	3732	8.3	2.2	29.1
06.06.2016 12:38:07	30.4	30.3	29.7	30.4	30.4	30.4	3738	0.1	0.6	29.7
06.06.2016 12:38:13	29.1	29	28	29.1	29.1	29.1	3744	0.1	1	28
06.06.2016 12:38:19	30.4	28.5	27.4	30.4	30.4	29	3750	1.9	1.1	27.4
06.06.2016 12:38:25	32.1	31.2	28.3	32.1	32.1	31.6	3756	0.9	2.9	28.3
06.06.2016 12:38:31	40.2	30.3	29	40.6	38.5	31.6	3762	9.9	1.3	29
06.06.2016 12:38:37	27.7	27.7	27.7	27.7	27.7	27.7	3768	0	0	27.7
06.06.2016 12:38:43	29.7	28.7	27.6	29.7	29.7	29.1	3774	1	1.1	27.6
06.06.2016 12:38:49	30.7	29.9	27.9	30.7	30.7	30.3	3780	0.8	2	27.9
06.06.2016 12:38:55	34.1	26.9	26.8	71.6	41.3	28.4	3786	7.2	0.1	26.8
06.06.2016 12:39:01	27.4	27.4	27.4	27.4	27.4	27.4	3792	0	0	27.4
06.06.2016 12:39:07	30.2	28.5	26.5	30.2	30.2	29.2	3798	1.7	2	26.5

[truncated: 23 more sheets: 13OS, 14OS, 22OS, 26 OS, 32 OS, 34 OS, 4MS, 15MS, 16MS, 17MS, 18MS, 19MS, 20MS, 21MS, 23MS, 24MS, 25MS, 27MS, 28MS, 29MS …]
